# Supplementary material
Source: MDPI journal article supplement (https://www.mdpi.com/2073-4352/7/12/354)
Supplement: s1 [file s1]

# Supplementary materials: Synthesis, crystal structure and luminescent properties of 2D zinc coordination polymers based on bis(1,2,4-triazol-1-yl)methane and 1,3-bis(1,2,4-triazol-1-yl)propane

Evgeny Semitut<sup>1,2</sup>, Taisiya Sukhikh<sup>2,3</sup>, Evgeny Filatov<sup>2,3</sup>, Alexey Ryadun<sup>2</sup>, Andrei Potapov<sup>1\*</sup>

1 Department of Biotechnology and Organic Chemistry, National Research Tomsk Polytechnic University, 30 Lenin Ave., 634050, Tomsk, Russia

2 Nikolaev Institute of Inorganic Chemistry, Siberian Branch of the Russian Academy of Sciences, Lavrentieva Ave., 3, 630090, Novosibirsk, Russia

3 Department of Natural Sciences, Novosibirsk State University, Pirogova Str. 2, 630090, Novosibirsk, Russia

\* Correspondence: potapov@tpu.ru; Tel.: +7-923-403-4103

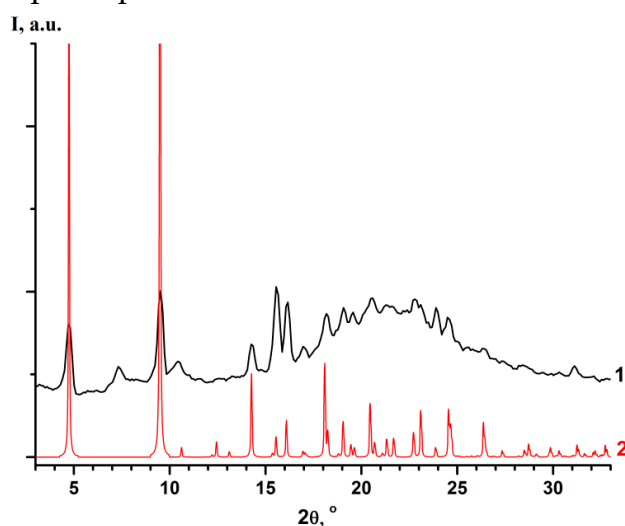

Figure S1. XRD patterns of compound 1: experimental (1) and simulated from single crystal data (2)

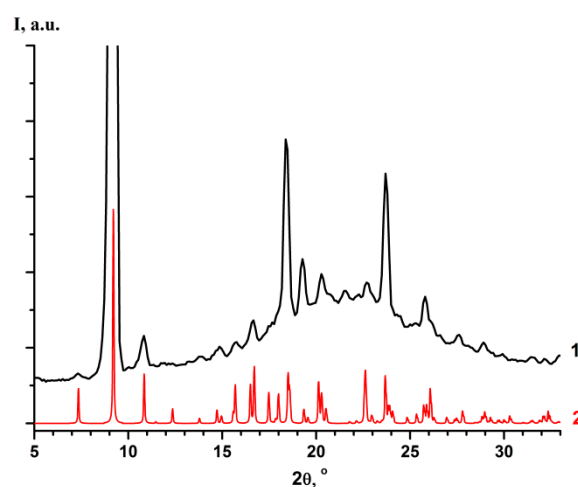

Figure S2. XRD patterns of compound 2: experimental (1) and simulated from single crystal data (2)

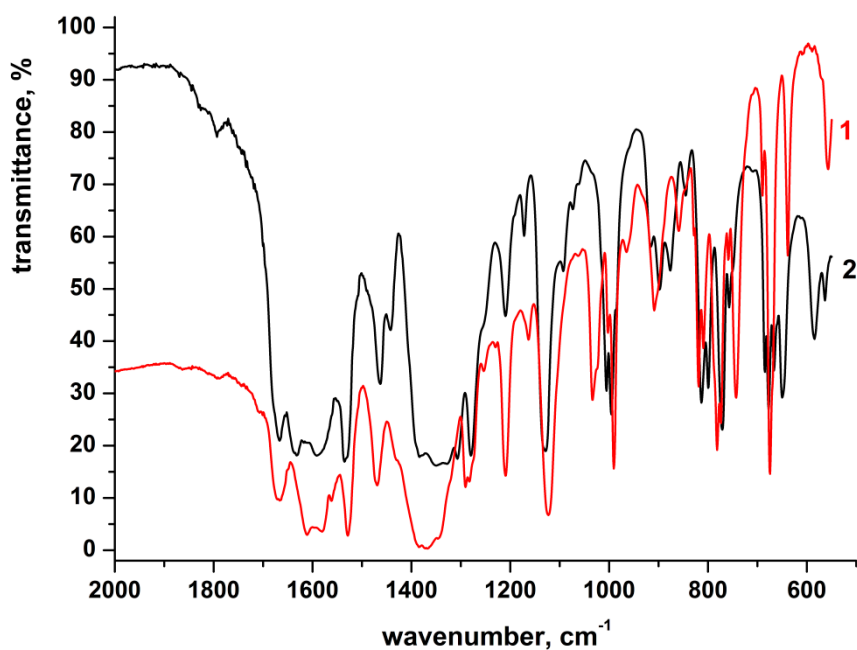

Figure S3. IR spectra of coordination polymers: 1 – compound **1**, 2 – compound **2**.

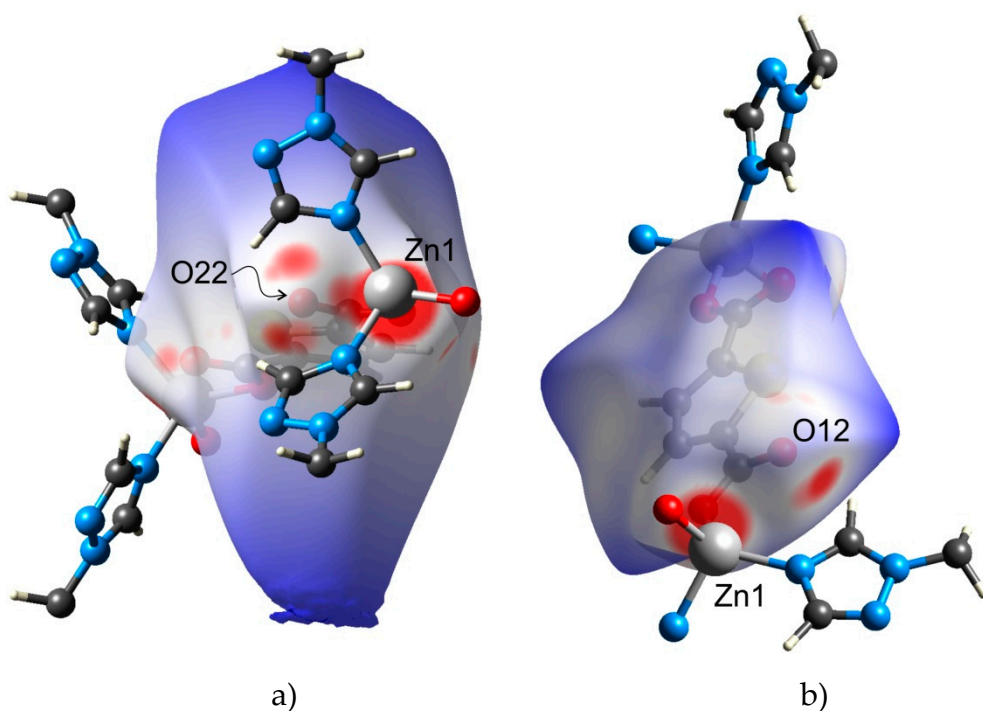

Figure S4. (a, b) The  $d_{\text{norm}}$  Hirshfeld surface of  $(\text{tdc})^{2-}$  ligands of the complex  $[\text{Zn}(\text{tdc})(\text{btrm})]\cdot 0.5\text{DMF}$  (**1**). Area with intermolecular contacts closer than the sum of atoms van der Waals radii are red, longer contacts are blue, and contacts around the sum of van der Waals radii are white. Blue prolate regions below and above  $(\text{tdc})^{2-}$  ligand (a) is an artifact of calculation due to lack of atoms in the voids of the crystal model.

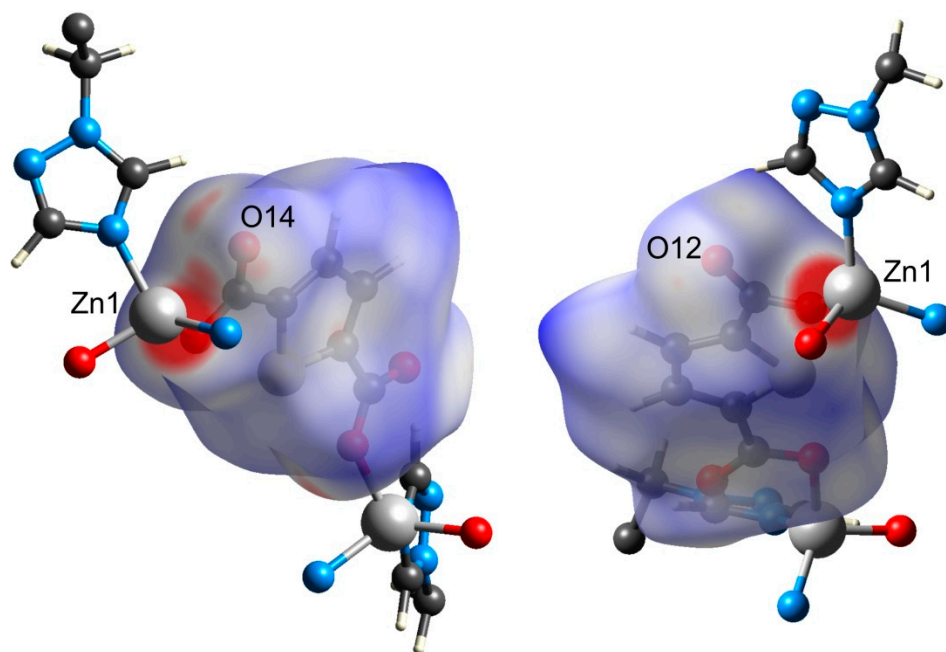

Figure S5. The  $d_{\text{norm}}$  Hirshfeld surface of  $(\text{tdc})^{2-}$  ligand of the complex  $[\text{Zn}(\text{tdc})(\text{btrp})]\cdot 0.5\text{DMF}$  (**2**) in different projections. Area with intermolecular contacts closer than the sum of atoms van der Waals radii are red, longer contacts are blue, and contacts around the sum of van der Waals radii are white.

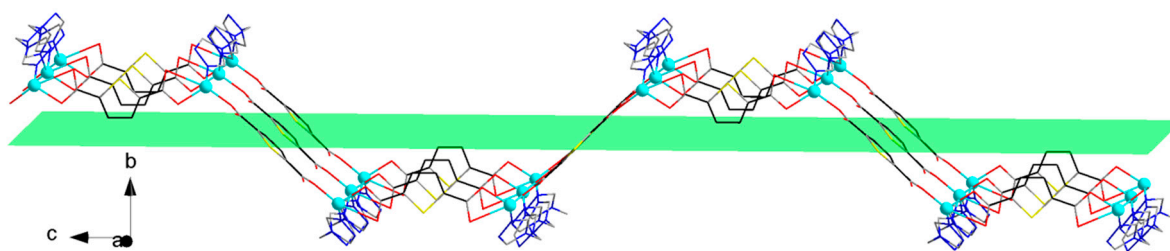

Figure S6. Fragment of the layer of the complex **1**. Green plane represents the mean plane of Zn atoms.

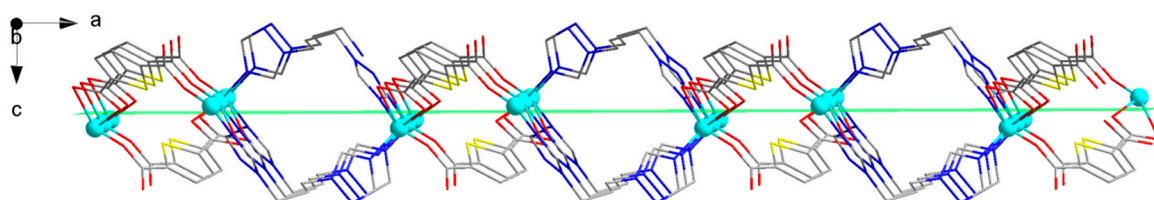

Figure S7. Fragment of the layer of the complex **2**. Green plane represents the mean plane of Zn atoms.
