# Supplementary material
Source: MDPI journal article supplement (https://www.mdpi.com/2073-4352/7/12/354)
Supplement: s1 [file s1]

Archive with 6 entries (5 files):
- crystals-245662-supplementary/
- crystals-245662-supplementary/1.cif
- crystals-245662-supplementary/1_checkcif.pdf
- crystals-245662-supplementary/2.cif
- crystals-245662-supplementary/2_checkcif.pdf
- crystals-245662-supplementary/Supplementary materials.pdf
