# Supplementary material
Source: MDPI journal article supplement (https://www.mdpi.com/2073-4352/7/12/354)
Supplement: s1 [file s1 › crystals-245662-supplementary/1.cif]

data_tgs185_sqd
_audit_creation_date              2017-11-02
_audit_creation_method
;
Olex2 1.2
(compiled 2017.08.10 svn.r3458 for OlexSys, GUI svn.r5381)
;
_shelx_SHELXL_version_number      '2014/7'
_publ_contact_author_address      ?
_publ_contact_author_email        ?
_publ_contact_author_id_orcid     ?
_publ_contact_author_name         ''
_publ_contact_author_phone        ?
_publ_section_references
;
Dolomanov, O.V., Bourhis, L.J., Gildea, R.J, Howard, J.A.K. & Puschmann, H.
 (2009), J. Appl. Cryst. 42, 339-341.
 
Sheldrick, G.M. (2015). Acta Cryst. C71, 3-8.
;
_chemical_name_common             ?
_chemical_name_systematic         ?
_chemical_formula_moiety          'C11 H8 N6 O4 S Zn'
_chemical_formula_sum             'C11 H8 N6 O4 S Zn'
_chemical_formula_weight          385.66
_chemical_melting_point           ?
loop_
  _atom_type_symbol
  _atom_type_description
  _atom_type_scat_dispersion_real
  _atom_type_scat_dispersion_imag
  _atom_type_scat_source
 'C' 'C' 0.0033 0.0016 'International Tables Vol C Tables 4.2.6.8 and 6.1.1.4'
 'H' 'H' 0.0000 0.0000 'International Tables Vol C Tables 4.2.6.8 and 6.1.1.4'
 'N' 'N' 0.0061 0.0033 'International Tables Vol C Tables 4.2.6.8 and 6.1.1.4'
 'O' 'O' 0.0106 0.0060 'International Tables Vol C Tables 4.2.6.8 and 6.1.1.4'
 'S' 'S' 0.1246 0.1234 'International Tables Vol C Tables 4.2.6.8 and 6.1.1.4'
 'Zn' 'Zn' 0.2839 1.4301 'International Tables Vol C Tables 4.2.6.8 and 6.1.1.4'
 
_shelx_space_group_comment
;
The symmetry employed for this shelxl refinement is uniquely defined
by the following loop, which should always be used as a source of
symmetry information in preference to the above space-group names.
They are only intended as comments.
;
_space_group_crystal_system       'orthorhombic'
_space_group_IT_number            57
_space_group_name_H-M_alt         'P b c m'
_space_group_name_Hall            '-P 2c 2b'
loop_
  _space_group_symop_operation_xyz
 'x, y, z'
 '-x, -y, z+1/2'
 '-x, y+1/2, -z+1/2'
 'x, -y+1/2, -z'
 '-x, -y, -z'
 'x, y, -z-1/2'
 'x, -y-1/2, z-1/2'
 '-x, y-1/2, z'
 
_cell_length_a                    9.3189(3)
_cell_length_b                    11.5387(3)
_cell_length_c                    37.2569(11)
_cell_angle_alpha                 90
_cell_angle_beta                  90
_cell_angle_gamma                 90
_cell_volume                      4006.2(2)
_cell_formula_units_Z             8
_cell_measurement_reflns_used     9936
_cell_measurement_temperature     298(2)
_cell_measurement_theta_max       24.62
_cell_measurement_theta_min       2.19
_shelx_estimated_absorpt_T_max    0.900
_shelx_estimated_absorpt_T_min    0.793
_exptl_absorpt_coefficient_mu     1.352
_exptl_absorpt_correction_T_max   0.7453
_exptl_absorpt_correction_T_min   0.6715
_exptl_absorpt_correction_type    multi-scan
_exptl_absorpt_process_details
;
SADABS-2012/1 (Bruker,2012) was used for absorption correction.
wR2(int) was 0.0568 before and 0.0454 after correction.
The Ratio of minimum to maximum transmission is 0.9010.
The \l/2 correction factor is 0.0015.
;

_exptl_absorpt_special_details    ?
_exptl_crystal_colour             colourless
_exptl_crystal_colour_primary     colourless
_exptl_crystal_density_diffrn     1.279
_exptl_crystal_density_meas       .
_exptl_crystal_density_method     ?
_exptl_crystal_description        prism
_exptl_crystal_F_000              1552
_exptl_crystal_size_max           0.18
_exptl_crystal_size_mid           0.17
_exptl_crystal_size_min           0.08
_exptl_transmission_factor_max    ?
_exptl_transmission_factor_min    ?
_diffrn_reflns_av_R_equivalents   0.0416
_diffrn_reflns_av_unetI/netI      0.0224
_diffrn_reflns_Laue_measured_fraction_full 0.998
_diffrn_reflns_Laue_measured_fraction_max 0.995
_diffrn_reflns_limit_h_max        11
_diffrn_reflns_limit_h_min        -7
_diffrn_reflns_limit_k_max        14
_diffrn_reflns_limit_k_min        -14
_diffrn_reflns_limit_l_max        45
_diffrn_reflns_limit_l_min        -45
_diffrn_reflns_number             42882
_diffrn_reflns_point_group_measured_fraction_full 0.998
_diffrn_reflns_point_group_measured_fraction_max 0.995
_diffrn_reflns_theta_full         25.242
_diffrn_reflns_theta_max          25.798
_diffrn_reflns_theta_min          2.185
_diffrn_ambient_temperature       298(2)
_diffrn_detector_area_resol_mean  ?
_diffrn_measured_fraction_theta_full 0.998
_diffrn_measured_fraction_theta_max 0.995
_diffrn_measurement_device_type   'CCD area detector'
_diffrn_measurement_method        'phi and omega scans'
_diffrn_radiation_monochromator   'graphite'
_diffrn_radiation_type            MoK\a
_diffrn_radiation_wavelength      0.71073
_diffrn_source                    ?
_reflns_Friedel_coverage          0.000
_reflns_Friedel_fraction_full     .
_reflns_Friedel_fraction_max      .
_reflns_number_gt                 3201
_reflns_number_total              3900
_reflns_special_details
;
 Reflections were merged by SHELXL according to the crystal
 class for the calculation of statistics and refinement.
 
 _reflns_Friedel_fraction is defined as the number of unique
 Friedel pairs measured divided by the number that would be
 possible theoretically, ignoring centric projections and
 systematic absences.
;
_reflns_threshold_expression      'I > 2\s(I)'
_computing_cell_refinement        ?
_computing_molecular_graphics     'Olex2 (Dolomanov et al., 2009)'
_computing_publication_material   'Olex2 (Dolomanov et al., 2009)'
_computing_structure_refinement   'ShelXL (Sheldrick, 2015)'
_computing_structure_solution     ?
_refine_diff_density_max          0.310
_refine_diff_density_min          -0.282
_refine_diff_density_rms          0.055
_refine_ls_extinction_coef        .
_refine_ls_extinction_method      none
_refine_ls_goodness_of_fit_ref    1.048
_refine_ls_hydrogen_treatment     constr
_refine_ls_matrix_type            full
_refine_ls_number_parameters      210
_refine_ls_number_reflns          3900
_refine_ls_number_restraints      0
_refine_ls_R_factor_all           0.0470
_refine_ls_R_factor_gt            0.0356
_refine_ls_restrained_S_all       1.048
_refine_ls_shift/su_max           0.002
_refine_ls_shift/su_mean          0.000
_refine_ls_structure_factor_coef  Fsqd
_refine_ls_weighting_details
'w=1/[\s^2^(Fo^2^)+(0.0370P)^2^+3.1730P] where P=(Fo^2^+2Fc^2^)/3'
_refine_ls_weighting_scheme       calc
_refine_ls_wR_factor_gt           0.0836
_refine_ls_wR_factor_ref          0.0871
_refine_special_details           ?
_olex2_refinement_description
;
1. Fixed Uiso
 At 1.2 times of:
  All C(H) groups, All C(H,H) groups
2.a Secondary CH2 refined with riding coordinates:
 C36(H36A,H36B)
2.b Aromatic/amide H refined with riding coordinates:
 C32(H32), C16(H16), C26(H26), C35(H35), C39(H39), C41(H41)
;
_atom_sites_solution_hydrogens    geom
_atom_sites_solution_primary      ?
_atom_sites_solution_secondary    ?
loop_
  _atom_site_label
  _atom_site_type_symbol
  _atom_site_fract_x
  _atom_site_fract_y
  _atom_site_fract_z
  _atom_site_U_iso_or_equiv
  _atom_site_adp_type
  _atom_site_occupancy
  _atom_site_site_symmetry_order
  _atom_site_calc_flag
  _atom_site_refinement_flags_posn
  _atom_site_refinement_flags_adp
  _atom_site_refinement_flags_occupancy
  _atom_site_disorder_assembly
  _atom_site_disorder_group
 Zn1 Zn 1.02011(3) 0.44307(3) 0.60891(2) 0.03475(11) Uani 1 1 d . . . . .
 S15 S 1.15360(10) 0.7500 0.5000 0.0440(2) Uani 1 2 d S T P . .
 S25 S 1.04808(13) 0.40097(8) 0.7500 0.0453(3) Uani 1 2 d S T P . .
 O11 O 0.9704(2) 0.5428(2) 0.56903(5) 0.0597(6) Uani 1 1 d . . . . .
 O12 O 1.1998(3) 0.5741(2) 0.55634(7) 0.0801(8) Uani 1 1 d . . . . .
 O21 O 1.0267(2) 0.53479(15) 0.65422(5) 0.0404(4) Uani 1 1 d . . . . .
 O22 O 1.0423(3) 0.35491(17) 0.67444(5) 0.0559(6) Uani 1 1 d . . . . .
 N31 N 0.8358(2) 0.34659(19) 0.60891(6) 0.0399(5) Uani 1 1 d . . . . .
 C32 C 0.7920(3) 0.2598(3) 0.63103(8) 0.0529(8) Uani 1 1 d . . . . .
 H32 H 0.8425 0.2379 0.6515 0.063 Uiso 1 1 calc R . . . .
 N34 N 0.6377(2) 0.26903(19) 0.59059(6) 0.0420(5) Uani 1 1 d . . . . .
 N37 N 0.3842(2) 0.25321(19) 0.58467(6) 0.0424(5) Uani 1 1 d . . . . .
 N38 N 0.3256(3) 0.1772(2) 0.60873(7) 0.0542(7) Uani 1 1 d . . . . .
 N40 N 0.1857(2) 0.33258(18) 0.60121(6) 0.0385(5) Uani 1 1 d . . . . .
 C13 C 1.0705(3) 0.5910(2) 0.55127(7) 0.0457(7) Uani 1 1 d . . . . .
 C14 C 1.0253(3) 0.6744(2) 0.52332(6) 0.0398(6) Uani 1 1 d . . . . .
 C16 C 0.8901(3) 0.7070(3) 0.51319(7) 0.0524(8) Uani 1 1 d . . . . .
 H16 H 0.8069 0.6753 0.5229 0.063 Uiso 1 1 calc R . . . .
 C23 C 1.0348(3) 0.4616(2) 0.67955(6) 0.0363(6) Uani 1 1 d . . . . .
 C24 C 1.0348(3) 0.5029(2) 0.71695(6) 0.0368(6) Uani 1 1 d . . . . .
 C26 C 1.0208(3) 0.6112(2) 0.73085(7) 0.0463(7) Uani 1 1 d . . . . .
 H26 H 1.0122 0.6778 0.7170 0.056 Uiso 1 1 calc R . . . .
 N33 N 0.6734(3) 0.2101(2) 0.62115(7) 0.0603(7) Uani 1 1 d . . . . .
 C35 C 0.7355(3) 0.3486(2) 0.58405(7) 0.0384(6) Uani 1 1 d . . . . .
 H35 H 0.7340 0.3992 0.5646 0.046 Uiso 1 1 calc R . . . .
 C36 C 0.5216(3) 0.2287(3) 0.56813(8) 0.0472(7) Uani 1 1 d . . . . .
 H36A H 0.5310 0.1459 0.5643 0.057 Uiso 1 1 calc R . . . .
 H36B H 0.5267 0.2667 0.5449 0.057 Uiso 1 1 calc R . . . .
 C39 C 0.2066(3) 0.2291(2) 0.61798(8) 0.0483(7) Uani 1 1 d . . . . .
 H39 H 0.1422 0.1983 0.6345 0.058 Uiso 1 1 calc R . . . .
 C41 C 0.2995(3) 0.3438(2) 0.58060(7) 0.0402(6) Uani 1 1 d . . . . .
 H41 H 0.3175 0.4063 0.5655 0.048 Uiso 1 1 calc R . . . .
 
loop_
  _atom_site_aniso_label
  _atom_site_aniso_U_11
  _atom_site_aniso_U_22
  _atom_site_aniso_U_33
  _atom_site_aniso_U_23
  _atom_site_aniso_U_13
  _atom_site_aniso_U_12
 Zn1 0.03485(17) 0.04287(19) 0.02652(16) -0.00096(13) 0.00226(12) -0.00210(13)
 S15 0.0372(5) 0.0520(6) 0.0429(5) 0.0091(5) 0.000 0.000
 S25 0.0822(8) 0.0281(4) 0.0255(5) 0.000 0.000 0.0012(5)
 O11 0.0723(14) 0.0718(14) 0.0349(11) 0.0200(10) 0.0073(10) -0.0008(12)
 O12 0.0582(15) 0.0728(16) 0.109(2) 0.0441(15) -0.0311(14) -0.0129(12)
 O21 0.0594(12) 0.0361(9) 0.0258(9) 0.0021(8) 0.0014(8) -0.0011(8)
 O22 0.0993(17) 0.0385(11) 0.0298(10) -0.0048(9) -0.0004(10) 0.0016(11)
 N31 0.0334(11) 0.0447(12) 0.0416(12) 0.0050(11) 0.0000(10) -0.0008(10)
 C32 0.0449(16) 0.0599(19) 0.0538(18) 0.0210(16) -0.0105(14) -0.0078(14)
 N34 0.0310(11) 0.0486(13) 0.0464(14) 0.0003(11) 0.0005(10) 0.0001(10)
 N37 0.0305(10) 0.0458(13) 0.0509(14) -0.0068(11) 0.0008(10) -0.0041(10)
 N38 0.0399(13) 0.0460(14) 0.0768(18) 0.0046(13) 0.0063(13) 0.0002(11)
 N40 0.0326(11) 0.0422(12) 0.0406(12) -0.0025(10) 0.0028(9) -0.0040(9)
 C13 0.0608(19) 0.0430(15) 0.0332(15) 0.0005(12) -0.0039(14) -0.0070(14)
 C14 0.0451(15) 0.0509(16) 0.0235(12) 0.0000(11) 0.0003(11) -0.0033(12)
 C16 0.0384(15) 0.082(2) 0.0366(15) 0.0074(14) 0.0050(12) -0.0054(15)
 C23 0.0475(15) 0.0338(14) 0.0276(13) 0.0013(11) 0.0001(11) -0.0017(11)
 C24 0.0521(16) 0.0328(13) 0.0255(13) 0.0008(10) 0.0017(11) -0.0021(12)
 C26 0.081(2) 0.0290(13) 0.0286(13) 0.0047(11) 0.0014(14) 0.0021(13)
 N33 0.0483(15) 0.0675(17) 0.0650(17) 0.0225(14) -0.0073(13) -0.0156(13)
 C35 0.0336(13) 0.0445(15) 0.0372(14) 0.0002(12) 0.0051(11) 0.0039(12)
 C36 0.0324(13) 0.0581(18) 0.0510(17) -0.0140(14) 0.0025(12) 0.0002(13)
 C39 0.0390(15) 0.0438(16) 0.0621(19) 0.0029(14) 0.0105(13) -0.0059(13)
 C41 0.0339(13) 0.0464(16) 0.0404(14) -0.0011(13) 0.0001(12) -0.0032(12)
 
_geom_special_details
;
 All esds (except the esd in the dihedral angle between two l.s. planes)
 are estimated using the full covariance matrix.  The cell esds are taken
 into account individually in the estimation of esds in distances, angles
 and torsion angles; correlations between esds in cell parameters are only
 used when they are defined by crystal symmetry.  An approximate (isotropic)
 treatment of cell esds is used for estimating esds involving l.s. planes.
;
loop_
  _geom_bond_atom_site_label_1
  _geom_bond_atom_site_label_2
  _geom_bond_distance
  _geom_bond_site_symmetry_2
  _geom_bond_publ_flag
 Zn1 O11 1.935(2) . ?
 Zn1 O21 1.9934(18) . ?
 Zn1 N31 2.046(2) . ?
 Zn1 N40 2.022(2) 1_655 ?
 S15 C14 1.717(3) 4_566 ?
 S15 C14 1.717(3) . ?
 S25 C24 1.708(3) . ?
 S25 C24 1.708(3) 6_557 ?
 O11 C13 1.272(4) . ?
 O12 C13 1.235(4) . ?
 O21 C23 1.269(3) . ?
 O22 C23 1.247(3) . ?
 N31 C32 1.360(3) . ?
 N31 C35 1.316(3) . ?
 C32 H32 0.9300 . ?
 C32 N33 1.298(4) . ?
 N34 N33 1.367(3) . ?
 N34 C35 1.317(3) . ?
 N34 C36 1.445(3) . ?
 N37 N38 1.368(3) . ?
 N37 C36 1.449(3) . ?
 N37 C41 1.319(3) . ?
 N38 C39 1.306(4) . ?
 N40 Zn1 2.022(2) 1_455 ?
 N40 C39 1.362(3) . ?
 N40 C41 1.316(3) . ?
 C13 C14 1.479(4) . ?
 C14 C16 1.368(4) . ?
 C16 C16 1.396(6) 4_566 ?
 C16 H16 0.9300 . ?
 C23 C24 1.473(3) . ?
 C24 C26 1.358(4) . ?
 C26 C26 1.427(5) 6_557 ?
 C26 H26 0.9300 . ?
 C35 H35 0.9300 . ?
 C36 H36A 0.9700 . ?
 C36 H36B 0.9700 . ?
 C39 H39 0.9300 . ?
 C41 H41 0.9300 . ?
 
loop_
  _geom_angle_atom_site_label_1
  _geom_angle_atom_site_label_2
  _geom_angle_atom_site_label_3
  _geom_angle
  _geom_angle_site_symmetry_1
  _geom_angle_site_symmetry_3
  _geom_angle_publ_flag
 O11 Zn1 O21 110.00(9) . . ?
 O11 Zn1 N31 97.04(9) . . ?
 O11 Zn1 N40 116.65(9) . 1_655 ?
 O21 Zn1 N31 108.34(8) . . ?
 O21 Zn1 N40 115.56(8) . 1_655 ?
 N40 Zn1 N31 107.29(9) 1_655 . ?
 C14 S15 C14 91.67(18) . 4_566 ?
 C24 S25 C24 92.29(17) . 6_557 ?
 C13 O11 Zn1 119.0(2) . . ?
 C23 O21 Zn1 106.15(15) . . ?
 C32 N31 Zn1 130.77(18) . . ?
 C35 N31 Zn1 125.88(18) . . ?
 C35 N31 C32 103.1(2) . . ?
 N31 C32 H32 122.9 . . ?
 N33 C32 N31 114.2(3) . . ?
 N33 C32 H32 122.9 . . ?
 N33 N34 C36 120.3(2) . . ?
 C35 N34 N33 109.4(2) . . ?
 C35 N34 C36 129.5(2) . . ?
 N38 N37 C36 120.4(2) . . ?
 C41 N37 N38 110.2(2) . . ?
 C41 N37 C36 129.4(2) . . ?
 C39 N38 N37 102.6(2) . . ?
 C39 N40 Zn1 126.66(18) . 1_455 ?
 C41 N40 Zn1 129.47(19) . 1_455 ?
 C41 N40 C39 103.8(2) . . ?
 O11 C13 C14 116.2(3) . . ?
 O12 C13 O11 124.5(3) . . ?
 O12 C13 C14 119.2(3) . . ?
 C13 C14 S15 119.2(2) . . ?
 C16 C14 S15 111.2(2) . . ?
 C16 C14 C13 129.5(3) . . ?
 C14 C16 C16 112.95(16) . 4_566 ?
 C14 C16 H16 123.5 . . ?
 C16 C16 H16 123.5 4_566 . ?
 O21 C23 C24 119.2(2) . . ?
 O22 C23 O21 123.1(2) . . ?
 O22 C23 C24 117.7(2) . . ?
 C23 C24 S25 117.30(18) . . ?
 C26 C24 S25 111.44(18) . . ?
 C26 C24 C23 131.2(2) . . ?
 C24 C26 C26 112.41(15) . 6_557 ?
 C24 C26 H26 123.8 . . ?
 C26 C26 H26 123.8 6_557 . ?
 C32 N33 N34 102.9(2) . . ?
 N31 C35 N34 110.4(2) . . ?
 N31 C35 H35 124.8 . . ?
 N34 C35 H35 124.8 . . ?
 N34 C36 N37 110.6(2) . . ?
 N34 C36 H36A 109.5 . . ?
 N34 C36 H36B 109.5 . . ?
 N37 C36 H36A 109.5 . . ?
 N37 C36 H36B 109.5 . . ?
 H36A C36 H36B 108.1 . . ?
 N38 C39 N40 113.7(2) . . ?
 N38 C39 H39 123.1 . . ?
 N40 C39 H39 123.1 . . ?
 N37 C41 H41 125.2 . . ?
 N40 C41 N37 109.7(2) . . ?
 N40 C41 H41 125.2 . . ?
 
_shelx_res_checksum               15727
_shelx_hkl_file
;
   1   0   0 2077789   15118
   2   0   0  462876   30157
   2   0   0  444621   32027
   2   0   0  453611   32027
   3   0   0  491431   10109
   3   0   0  472589   10589
   3   0   0  484013   10589
   4   0   0  210334    8429
   4   0   0  206862    8449
   4   0   0  210486    8049
   5   0   0  203000    5789
   5   0   0  203861    5589
   6   0   0  192337    6809
   6   0   0  182708    6349
   6   0   0  180898    6339
   7   0   0    7571     520
   7   0   0    7305     470
   7   0   0    8199     430
   8   0   0    1538     340
   8   0   0    1700     360
   8   0   0    1510     280
   9   0   0      20     240
   9   0   0     147     300
   9   0   0      20     290
  10   0   0     216     330
  10   0   0     349     360
  10   0   0     802     300
  10   0   0     511     350
  11   0   0      52     400
  11   0   0     294     350
  11   0   0       0     340
  11  -1   0    6526     580
  11  -1   0    5551     650
  10  -1   0    3937     390
  10  -1   0    3673     520
  10  -1   0    4110     490
   9  -1   0    2165     310
   9  -1   0    1896     380
   9  -1   0    1866     410
   8  -1   0    1374     320
   8  -1   0    1259     250
   8  -1   0     904     370
   7  -1   0     172     110
   7  -1   0       2     240
   7  -1   0     127     110
   7  -1   0      62     300
   7  -1   0      93     190
   6  -1   0   10447     560
   6  -1   0   12119     370
   6  -1   0   11781     430
   6  -1   0   10776     360
   6  -1   0   11330     500
   5  -1   0   11453     730
   5  -1   0   12471     590
   5  -1   0   11780     670
   5  -1   0   12402     590
   4  -1   0   37919    1110
   4  -1   0   37186    1090
   4  -1   0   37445    1090
  -4   1   0   37768    1100
   3  -1   0   13719     510
   3  -1   0   14736     510
   3  -1   0   13472     540
  -3   1   0   13976     540
   2  -1   0      44     100
   2  -1   0      52     100
   2  -1   0     379     150
  -2   1   0     189     130
   1  -1   0    5486     240
   1  -1   0    4886     240
   1  -1   0    5083     210
   1  -1   0    4299     240
  -1   1   0    5014     240
  -1   1   0    5161     240
  -1  -1   0    4374     230
  -1  -1   0    5768     260
  -1  -1   0    5001     230
   1   1   0    5709     260
   1   1   0    4962     230
   1   1   0    5178     250
  -2  -1   0      45      50
  -2  -1   0     112      50
   2   1   0     138     130
   3   1   0   13682     560
   4   1   0   36745    1080
   5   1   0   11931     670
   5   1   0   13265     690
   6   1   0   11703     500
   6   1   0   11398     480
   6   1   0   11217     560
   7   1   0     379     280
   7   1   0      20     290
   7   1   0     313     250
   7   1   0     231     250
   8   1   0     681     330
   8   1   0    1704     320
   8   1   0    1403     320
   8   1   0    1164     280
   9   1   0    2815     360
   9   1   0    2106     400
   9   1   0    1836     360
   9   1   0    2006     380
  10   1   0    4558     530
  10   1   0    4335     440
  10   1   0    3592     480
  10   1   0    4040     470
  11   1   0    6309     530
  11   1   0    5811     570
  11   1   0    5666     610
  11   1   0    6585     570
  11  -2   0      28     400
  11  -2   0       9     350
  10  -2   0     540     360
  10  -2   0      65     370
   9  -2   0    2111     270
   9  -2   0    2774     390
   9  -2   0    2100     390
   9  -2   0    2565     180
   8  -2   0    1989     200
   8  -2   0    2008     200
   8  -2   0    2464     390
   8  -2   0    1630     420
   8  -2   0    1814     260
   7  -2   0   15223     530
   7  -2   0   14736     760
   7  -2   0   16132     570
   7  -2   0   15959     680
   7  -2   0   15158     530
   6  -2   0    1442     340
   6  -2   0    1022     360
   6  -2   0     925     230
   6  -2   0    1313     250
   5  -2   0   50606    1200
   5  -2   0   52689    1200
   5  -2   0   51826    1220
   5  -2   0   51338    1320
   4  -2   0  253856   10199
   4  -2   0  259494    9689
   4  -2   0  267255   10379
   4  -2   0  256820   10189
  -4   2   0  263723    9689
   3  -2   0  274030    6219
   3  -2   0  266169    6219
   3  -2   0  268819    6549
   3  -2   0  264878    6549
   2  -2   0  595067   25387
   2  -2   0  593250   26827
   2  -2   0  594260   26787
   2  -2   0  590974   25447
  -2   2   0  623763   25437
   1  -2   0  647586    9979
   1  -2   0  656962   10599
   1  -2   0  635996    9969
   1  -2   0  670975   10559
   1  -2   0  639840   10559
   1  -2   0  643057   10529
  -1   2   0  649367    9979
  -1   2   0  650116   10559
   0  -2   0   27012     560
   0  -2   0   24954     530
   0  -2   0   25512     530
   0  -2   0   25122     530
   0   2   0   24551     570
   0   2   0   23488     580
   0   2   0   25996     530
   0   2   0   25426     530
  -1  -2   0  666534   10469
  -1  -2   0  628651   10299
  -1  -2   0  623795   10299
   1   2   0  646654    9769
   1   2   0  627470   10799
   1   2   0  638452    9789
   1   2   0  651967   10539
  -2  -2   0  588308   27087
  -2  -2   0  609083   27107
  -2  -2   0  627012   27497
   2   2   0  606335   27097
   2   2   0  597257   25917
   2   2   0  627728   27597
  -3  -2   0  272580    6639
  -3  -2   0  271717    6639
   3   2   0  275363    6769
   3   2   0  272695    6389
   4   2   0  254834    9639
   4   2   0  257998   10209
   5   2   0   52136    1200
   5   2   0   49500    1270
   6   2   0    1096     330
   6   2   0     957     310
   6   2   0    1020     310
   6   2   0    1558     350
   7   2   0   16105     700
   7   2   0   15770     670
   7   2   0   16721     740
   7   2   0   15077     660
   8   2   0    2479     390
   8   2   0    1950     380
   8   2   0    1719     340
   8   2   0    1775     330
   9   2   0    2543     380
   9   2   0    2477     350
   9   2   0    2697     380
   9   2   0    2100     360
  10   2   0      72     300
  10   2   0     440     340
  10   2   0     521     350
  10   2   0      42     330
  11   2   0       9     330
  11   2   0       9     350
  11   2   0     268     360
  11   2   0       9     360
  11  -3   0    1221     440
  11  -3   0    2227     540
  10  -3   0    7296     600
  10  -3   0    6366     640
   9  -3   0   23826     970
   9  -3   0   26390    1250
   9  -3   0   26172    1140
   9  -3   0   25637     960
   8  -3   0   18438     690
   8  -3   0   19309     950
   8  -3   0   18561     710
   8  -3   0   18182     850
   7  -3   0   52015    1750
   7  -3   0   52584    1820
   7  -3   0   49887    1730
   7  -3   0   50602    2010
   7  -3   0   49906    1840
   7  -3   0   50661    1820
   6  -3   0   11498     630
   6  -3   0   11529     490
   6  -3   0   11888     450
   6  -3   0   12351     490
   6  -3   0   11951     570
   5  -3   0   14244     670
   5  -3   0   15207     610
   5  -3   0   13902     770
   5  -3   0   14716     660
   5  -3   0   14151     710
   4  -3   0   55120    1410
   4  -3   0   52013    1600
   4  -3   0   52201    1490
   4  -3   0   54635    1530
   4  -3   0   55662    1520
  -4   3   0   54669    1490
   3  -3   0   40201    1860
   3  -3   0   41144    1920
   3  -3   0   40278    1790
   3  -3   0   41814    1870
   3  -3   0   40158    1720
   2  -3   0    4561     170
   2  -3   0    5541     180
   2  -3   0    4506     150
   2  -3   0    4653     160
   2  -3   0    5217     200
   2  -3   0    4282      90
  -2   3   0    4797     100
   1  -3   0    2799     350
   1  -3   0    2667     370
   1  -3   0    2987     370
   1  -3   0    3270     380
   1  -3   0    2975     380
   1  -3   0    3048     310
  -1   3   0    2787     380
  -1   3   0    3245     310
  -1   3   0    3251     370
  -1   3   0    3183     350
  -1  -3   0    3337     380
  -1  -3   0    3400     350
  -1  -3   0    2738     350
  -1  -3   0    3219     360
  -1  -3   0    3078     360
   1   3   0    2895     400
   1   3   0    3158     370
   1   3   0    2786     350
   1   3   0    3250     360
  -2  -3   0    3751     120
  -2  -3   0    5008     170
  -2  -3   0    4542     120
   2   3   0    4615     180
   2   3   0    4651     180
   2   3   0    4128     120
   2   3   0    4867     150
  -3  -3   0   40284    1800
  -3  -3   0   39239    1800
   3   3   0   41030    1790
   3   3   0   40190    1880
  -4  -3   0   54450    1460
  -4  -3   0   55002    1460
   4   3   0   52603    1580
   4   3   0   54594    1510
   5   3   0   14376     700
   5   3   0   14450     740
   5   3   0   14607     720
   6   3   0   11708     560
   6   3   0   11888     550
   6   3   0   10970     570
   7   3   0   50478    1910
   7   3   0   50155    1950
   7   3   0   50194    1830
   8   3   0   19102     900
   8   3   0   19440     890
   8   3   0   19757     860
   8   3   0   18047     830
   9   3   0   25626    1160
   9   3   0   25418    1110
   9   3   0   25121    1100
   9   3   0   24181    1150
  10   3   0    7046     630
  10   3   0    7485     590
  10   3   0    6913     600
  10   3   0    8597     670
  11   3   0    1446     420
  11   3   0    1446     440
  11   3   0     930     450
  11   3   0     894     400
  10  -4   0      12     370
  10  -4   0      12     320
  10  -4   0      43     180
   9  -4   0     328     200
   9  -4   0    1008     360
   9  -4   0    1206     420
   8  -4   0    6624     620
   8  -4   0    5624     370
   8  -4   0    5267     530
   8  -4   0    6218     430
   7  -4   0     434     170
   7  -4   0     280     350
   7  -4   0     223     290
   7  -4   0     512     190
   7  -4   0     234     210
   7  -4   0     274     210
   6  -4   0    7721     590
   6  -4   0    7085     520
   6  -4   0    7636     430
   6  -4   0    7858     520
   6  -4   0    6807     650
   5  -4   0   12466     500
   5  -4   0   12660     480
   5  -4   0   12775     570
   5  -4   0   12294     470
   5  -4   0   12030     360
   4  -4   0    4357     270
   4  -4   0    5019     190
   4  -4   0    4297     320
   4  -4   0    5813     300
   4  -4   0    5185     320
   3  -4   0      44     200
   3  -4   0      41     190
   3  -4   0      27     190
   3  -4   0      39     190
   3  -4   0      23      90
   3  -4   0     114     220
  -3   4   0      44     100
  -3   4   0     195     180
   2  -4   0    7043     670
   2  -4   0    6667     560
   2  -4   0    6718     670
   2  -4   0    6244     630
   2  -4   0    7384     700
   2  -4   0    7159     660
  -2   4   0    6673     570
   1  -4   0    9214    1110
   1  -4   0    9106    1150
   1  -4   0    9841    1220
   1  -4   0    8891    1190
   1  -4   0    9100    1220
  -1   4   0    9049    1220
  -1   4   0    8728    1110
  -1   4   0    8672    1240
  -1   4   0    9539    1160
   0  -4   0   35465    2780
   0  -4   0   31000    2930
   0  -4   0   37077    2940
   0  -4   0   32534    2900
   0  -4   0   32137    2770
   0   4   0   33448    2770
   0   4   0   34504    2940
   0   4   0   33092    2970
   0   4   0   32988    2780
  -1  -4   0    8629    1140
  -1  -4   0    9470    1150
  -1  -4   0    8604    1200
   1   4   0    9289    1150
   1   4   0    8807    1140
   1   4   0    9672    1200
   1   4   0    8594    1230
  -2  -4   0    5151     570
   2   4   0    5479     620
   2   4   0    5176     590
   2   4   0    5571     560
  -3  -4   0       8     130
  -3  -4   0       1     130
  -3  -4   0      87     190
   3   4   0      22     180
   3   4   0      63     200
  -4  -4   0    4184     210
  -4  -4   0    4727     300
  -4  -4   0    4438     210
   4   4   0    4281     230
   4   4   0    4799     320
   4   4   0    4438     300
  -5  -4   0   12849     390
  -5  -4   0   12586     390
   5   4   0   13953     570
   5   4   0   13783     480
   5   4   0   13020     530
   6   4   0    6594     530
   6   4   0    6317     570
   6   4   0    7651     590
   7   4   0     239     320
   7   4   0     510     310
   7   4   0     168     270
   8   4   0    5893     520
   8   4   0    5497     530
   8   4   0    5817     570
   9   4   0     889     330
   9   4   0     800     380
   9   4   0    1097     340
   9   4   0     800     340
  10   4   0      18     330
  10   4   0      12     350
  10   4   0      12     330
  10   4   0      13     310
  10  -5   0    5790     600
  10  -5   0    6242     460
  10  -5   0    5934     650
   9  -5   0   12522     780
   9  -5   0   11173     620
   9  -5   0   13648     860
   8  -5   0   20821     980
   8  -5   0   20801    1080
   8  -5   0   22801     910
   7  -5   0    1974     360
   7  -5   0    2072     170
   7  -5   0    1445     270
   7  -5   0    1788     400
   6  -5   0   22388    1030
   6  -5   0   22655     960
   6  -5   0   21972     760
   6  -5   0   21834     910
   6  -5   0   21794     920
   5  -5   0   42720    1280
   5  -5   0   41920    1470
   5  -5   0   41900    1540
   5  -5   0   43580    1460
   5  -5   0   41807    1440
   4  -5   0   16203     790
   4  -5   0   18018     810
   4  -5   0   17068     640
   4  -5   0   17896     840
   4  -5   0   17284     800
   3  -5   0   16657     670
   3  -5   0   16990     540
   3  -5   0   18437     690
   3  -5   0   17219     680
   3  -5   0   16907     660
  -3   5   0   16428     540
   2  -5   0    2043     150
   2  -5   0    1940     250
   2  -5   0    2370     230
   2  -5   0    1869     210
   2  -5   0    1325     220
   2  -5   0    1582     230
  -2   5   0    2094     160
  -2   5   0    2145     240
   1  -5   0   14688     620
   1  -5   0   14445     560
   1  -5   0   15378     600
   1  -5   0   15043     530
   1  -5   0   14891     620
  -1   5   0   15348     650
  -1   5   0   15054     580
  -1   5   0   14455     530
  -1  -5   0   14692     610
  -1  -5   0   15352     580
  -1  -5   0   15847     590
  -1  -5   0   14895     620
  -1  -5   0   14692     600
   1   5   0   15311     650
   1   5   0   15675     580
   1   5   0   14490     580
  -2  -5   0    2074     250
  -2  -5   0    1787     210
  -2  -5   0    2063     200
   2   5   0    2329     220
   2   5   0    1941     260
   2   5   0    1838     240
  -3  -5   0   16184     630
  -3  -5   0   17693     700
  -3  -5   0   16902     630
   3   5   0   18504     650
   3   5   0   17818     570
   3   5   0   17880     690
   3   5   0   17474     710
  -4  -5   0   16474     720
   4   5   0   16907     830
   4   5   0   17697     720
   4   5   0   17556     810
  -5  -5   0   41276    1370
   5   5   0   41686    1420
   5   5   0   44023    1460
   5   5   0   42517    1530
  -6  -5   0   21796     800
   6   5   0   21816    1020
   6   5   0   23299     920
   6   5   0   22192     980
   7   5   0    1508     280
   7   5   0    1567     370
   7   5   0    1498     360
   8   5   0   22311    1070
   8   5   0   22190    1020
   8   5   0   22351     980
   9   5   0   12447     820
   9   5   0   12659     790
   9   5   0   13192     770
   9   5   0   13031     730
  10   5   0    4914     610
  10   5   0    5973     630
  10   5   0    5973     540
  10   5   0    7913     610
  10  -6   0       3     390
  10  -6   0      56     410
  10  -6   0     116     250
   9  -6   0     220     340
   9  -6   0     244     380
   9  -6   0     156     250
   8  -6   0    4099     400
   8  -6   0    3289     480
   8  -6   0    3569     470
   7  -6   0    1124     310
   7  -6   0     758     260
   7  -6   0     717     350
   6  -6   0    1812     370
   6  -6   0    1410     290
   6  -6   0    1551     280
   6  -6   0    1299     310
   5  -6   0   20125     880
   5  -6   0   20383     860
   5  -6   0   19142     930
   5  -6   0   19708     860
   4  -6   0     131      90
   4  -6   0      11     210
   4  -6   0      11     210
   4  -6   0      11     230
   4  -6   0      11     210
   3  -6   0    1310     280
   3  -6   0    1129     290
   3  -6   0    1231     270
   2  -6   0   25968     860
   2  -6   0   24997     820
   2  -6   0   29268     870
   2  -6   0   26269     720
   2  -6   0   24360     800
  -2   6   0   24908     880
  -2   6   0   25310     730
   1  -6   0    9895     470
   1  -6   0   10425     560
   1  -6   0    8500     470
   1  -6   0    8268     560
   1  -6   0    8883     540
  -1   6   0    9053     470
  -1   6   0    8011     560
   0  -6   0   43804    1510
   0  -6   0   43978    1430
   0  -6   0   44980    1400
   0  -6   0   44663    1420
   0   6   0   43037    1420
   0   6   0   43814    1410
   0   6   0   43569    1540
  -1  -6   0    8834     500
  -1  -6   0    8576     520
  -1  -6   0    9227     540
   1   6   0    8718     500
   1   6   0   10016     520
   1   6   0    8460     580
  -2  -6   0   24810     800
  -2  -6   0   24866     780
   2   6   0   25592     800
   2   6   0   24273     860
   2   6   0   25972     770
  -3  -6   0     139     180
   3   6   0      73     240
   3   6   0     134     210
  -4  -6   0     131     160
   4   6   0      74     250
   4   6   0     414     110
   4   6   0     518     240
  -5  -6   0   21775     810
   5   6   0   20376     920
   5   6   0   19612     940
   5   6   0   20743     800
  -6  -6   0    1602     200
   6   6   0    1441     230
   6   6   0    1682     350
   6   6   0    2014     370
   7   6   0    1476     260
   7   6   0     905     360
   7   6   0     926     350
   8   6   0    3165     500
   8   6   0    3365     490
   8   6   0    4064     390
   9   6   0     101     270
   9   6   0       9     370
   9   6   0       9     380
  10   6   0       3     320
  10   6   0       3     400
  10   6   0       3     430
   9  -7   0    1706     340
   9  -7   0    2122     490
   9  -7   0    1556     420
   8  -7   0     814     310
   8  -7   0     924     390
   8  -7   0     632     350
   7  -7   0   10613     660
   7  -7   0   10917     650
   7  -7   0   11039     750
   6  -7   0    1026     320
   6  -7   0     724     340
   6  -7   0     861     350
   5  -7   0      12     260
   5  -7   0      12     280
   5  -7   0      12     260
   4  -7   0     536     280
   4  -7   0     891     130
   4  -7   0     553     270
   4  -7   0     766     290
  -4   7   0     819     140
   3  -7   0    1016     250
   3  -7   0     528     270
   3  -7   0     888     250
   3  -7   0     897     150
  -3   7   0    1107     170
   2  -7   0    7260     460
   2  -7   0    6881     300
   2  -7   0    5534     340
   2  -7   0    7260     440
  -2   7   0    6501     320
  -2   7   0    5568     410
   1  -7   0   16020     750
   1  -7   0   15734     670
   1  -7   0   15286     660
   1  -7   0   14934     760
  -1   7   0   15848     660
  -1   7   0   15753     790
  -1  -7   0   15513     720
  -1  -7   0   15275     740
   1   7   0   14923     780
   1   7   0   14818     690
  -2  -7   0    6727     410
  -2  -7   0    5694     360
   2   7   0    6984     410
   2   7   0    6134     440
  -3  -7   0     998     230
   3   7   0     842     310
   3   7   0     563     250
  -4  -7   0     877     220
   4   7   0     689     300
   4   7   0     281     280
  -5  -7   0       5     190
   5   7   0      13     290
   5   7   0     108     130
   5   7   0      79     270
   6   7   0     923     190
   6   7   0     823     370
   6   7   0     850     330
   7   7   0   11200     750
   7   7   0   10053     730
   7   7   0   10632     530
   8   7   0    1366     430
   8   7   0    1406     440
   9   7   0    1790     480
   9   7   0    1854     470
   9  -8   0    4430     490
   9  -8   0    3979     540
   9  -8   0    3821     570
   8  -8   0     124     370
   8  -8   0     262     320
   8  -8   0     199     370
   7  -8   0    3914     440
   7  -8   0    3417     480
   7  -8   0    3189     470
   6  -8   0    8398     660
   6  -8   0    9241     660
   6  -8   0    6882     610
   5  -8   0    5784     470
   5  -8   0    4777     450
   5  -8   0    4733     450
   4  -8   0   25640    1140
   4  -8   0   27229    1180
   4  -8   0   28199     970
   4  -8   0   26871    1210
  -4   8   0   27608     980
   3  -8   0   33717    1340
   3  -8   0   37085    1410
   3  -8   0   38051    1200
   3  -8   0   35356    1350
  -3   8   0   36341    1220
   2  -8   0   23397     770
   2  -8   0   23459     930
   2  -8   0   23043     900
   2  -8   0   21065     830
  -2   8   0   22929     790
  -2   8   0   20251     950
   1  -8   0   33427    1440
   1  -8   0   37181    1400
   1  -8   0   35251    1480
   1  -8   0   38208    1560
  -1   8   0   33669    1590
  -1   8   0   36715    1410
   0  -8   0   13033     570
   0  -8   0   14446     600
   0   8   0   13560     640
   0   8   0   14225     530
  -1  -8   0   36575    1550
  -1  -8   0   35550    1490
   1   8   0   37761    1480
   1   8   0   35130    1610
  -2  -8   0   20819     870
  -2  -8   0   23016     880
   2   8   0   19619     940
   2   8   0   23505     870
  -3  -8   0   35958    1330
   3   8   0   37235    1340
   3   8   0   33807    1430
  -4  -8   0   27503    1120
   4   8   0   27668    1180
   4   8   0   25536    1240
  -5  -8   0    5265     370
   5   8   0    5514     500
   5   8   0    4570     480
   6   8   0    7448     660
   6   8   0    7233     620
   7   8   0    3860     510
   7   8   0    3311     530
   8   8   0      19     410
   8   8   0       3     390
   9   8   0    5567     660
   8  -9   0     557     390
   8  -9   0     840     360
   8  -9   0     435     360
   7  -9   0       5     360
   7  -9   0     178     340
   7  -9   0     509     360
   6  -9   0     467     350
   6  -9   0     478     340
   6  -9   0      47     350
   5  -9   0     671     350
   5  -9   0     294     300
   5  -9   0     939     350
   4  -9   0     270     280
   4  -9   0      63     320
   4  -9   0     509     340
  -4   9   0     782     180
   3  -9   0       0     220
   3  -9   0       0     300
   3  -9   0       0     300
  -3   9   0       0     190
   2  -9   0    3051     430
   2  -9   0    2986     310
   2  -9   0    2319     400
  -2   9   0    2273     290
  -2   9   0    1370     390
   1  -9   0    1700     360
   1  -9   0    1590     330
   1  -9   0    1333     210
  -1   9   0    1028     250
  -1   9   0    1556     390
  -1  -9   0    1222     310
  -1  -9   0    1724     350
   1   9   0    1109     370
   1   9   0    1143     280
  -2  -9   0    2902     400
  -2  -9   0    2494     400
   2   9   0    2531     460
   2   9   0    2264     380
  -3  -9   0       0     260
   3   9   0     918     380
   3   9   0       0     320
  -4  -9   0     349     260
   4   9   0     437     350
   4   9   0     563     400
   5   9   0     552     400
   5   9   0     324     370
   6   9   0     487     400
   6   9   0      59     380
   7   9   0      11     420
   7   9   0       5     410
   8   9   0       0     450
   8   9   0       0     470
   8 -10   0    2758     510
   8 -10   0    1785     510
   8 -10   0    2237     550
   7 -10   0    6059     590
   7 -10   0    5001     560
   7 -10   0    4897     590
   6 -10   0    9261     770
   6 -10   0    8847     760
   6 -10   0    9434     740
   5 -10   0   14458     830
   5 -10   0   12447     760
   5 -10   0   16134     870
   4 -10   0    8287     690
   4 -10   0    6737     550
   4 -10   0    5553     560
   3 -10   0    4060     500
   3 -10   0    3234     370
   3 -10   0    3560     470
  -3  10   0    4152     340
   2 -10   0    3584     500
   2 -10   0    3403     350
   2 -10   0    3441     480
  -2  10   0    3346     350
  -2  10   0    2881     520
   1 -10   0   14556     810
   1 -10   0   13961     770
   1 -10   0   12963     590
  -1  10   0   13366     670
  -1  10   0   12247     840
   0 -10   0   44981    1670
   0 -10   0   49397    1770
   0  10   0   47618    1630
   0  10   0   43667    1780
  -1 -10   0   12117     730
  -1 -10   0   14183     770
   1  10   0   14405     730
   1  10   0    9979     800
  -2 -10   0    3763     460
  -2 -10   0    3287     460
   2  10   0    4164     460
   2  10   0    3639     560
  -3 -10   0    3665     410
   3  10   0    3584     460
   3  10   0    3461     520
  -4 -10   0    7567     580
   4  10   0    6283     640
   4  10   0    6714     600
   5  10   0   14949     870
   5  10   0   12083     940
   6  10   0    8056     800
   6  10   0   10288     850
   7  10   0    5474     680
   7  10   0    4664     630
   8  10   0    2058     570
   8  10   0    2976     600
   7 -11   0    1862     480
   7 -11   0    2148     450
   7 -11   0    2104     470
   6 -11   0    2234     500
   6 -11   0    2656     520
   6 -11   0    2733     470
   5 -11   0    2608     490
   5 -11   0    1362     390
   5 -11   0    2765     520
   4 -11   0    5744     590
   4 -11   0    3801     510
   4 -11   0    3781     450
   3 -11   0     778     350
   3 -11   0    1584     400
   3 -11   0    1164     280
   2 -11   0    2181     290
   2 -11   0    2008     420
   2 -11   0    1302     410
  -2  11   0    1652     300
  -2  11   0    2148     480
   1 -11   0       2     340
   1 -11   0      60     340
  -1  11   0     394     440
  -1  11   0       2     260
  -1 -11   0       2     340
  -1 -11   0     108     340
   1  11   0       2     300
   1  11   0     221     450
  -2 -11   0    1683     390
  -2 -11   0    1986     420
   2  11   0    1802     380
   2  11   0    2319     500
  -3 -11   0    1200     350
   3  11   0     732     460
   3  11   0     636     370
   4  11   0    4100     630
   4  11   0    4635     560
   5  11   0    2209     550
   5  11   0    2404     500
   6  11   0    2725     660
   6  11   0    2437     540
   7  11   0    1522     570
   7  11   0    2556     580
   6 -12   0       7     420
   5 -12   0       1     340
   5 -12   0     275     430
   5 -12   0      70     440
   4 -12   0    2763     540
   4 -12   0    3694     570
   3 -12   0    5932     640
   3 -12   0    4905     580
   2 -12   0    6404     640
   2 -12   0    5508     620
   1 -12   0    1345     440
   1 -12   0     993     460
  -1  12   0     433     330
  -1  12   0    1047     530
   0 -12   0     166     410
   0 -12   0     694     400
   0  12   0     373     340
   0  12   0     807     520
  -1 -12   0    1089     430
  -1 -12   0     439     410
   1  12   0     663     370
   1  12   0     972     530
  -2 -12   0    6300     580
  -2 -12   0    6021     620
   2  12   0    5065     690
   2  12   0    5612     580
   3  12   0    4483     540
   3  12   0    4388     640
   4  12   0    3410     550
   4  12   0    1747     560
   5  12   0      86     500
   5  12   0      78     460
   4 -13   0     957     480
   4 -13   0      81     450
   3 -13   0     495     460
   3 -13   0    1281     520
   2 -13   0    2494     500
   2 -13   0    3077     580
   1 -13   0      35     430
   1 -13   0       0     410
  -1  13   0     150     510
  -1 -13   0       0     410
  -1 -13   0     151     440
   1  13   0       0     360
   1  13   0       0     490
  -2 -13   0    2638     500
   2  13   0    2416     480
   2  13   0    2296     600
   3  13   0    1017     490
   3  13   0     864     580
   4  13   0       2     550
   4  13   0     172     460
   1 -14   0      12     470
   1 -14   0     349     470
  -1  14   0     458     560
   0 -14   0     889     490
   0 -14   0     731     510
   0  14   0    1354     640
  -1 -14   0     680     500
  -1 -14   0      12     430
   1  14   0      80     600
   1  14  -1       6     560
   1  14  -1     867     440
  -1 -14   1    1063     490
  -1 -14   1     167     440
   0  14  -1      46     570
   0 -14   1       0     440
   0 -14   1     360     490
  -1  14  -1     130     570
   1 -14   1     180     480
   1 -14   1     287     480
   4  13  -1     511     600
   4  13  -1     227     440
   3  13  -1      36     410
   3  13  -1      36     480
   2  13  -1      14     540
   2  13  -1      21     400
  -2 -13   1     184     410
   1  13  -1       3     500
   1  13  -1     546     400
  -1 -13   1      14     430
  -1 -13   1       8     420
  -1  13  -1     371     500
   1 -13   1     781     450
   1 -13   1     772     450
   2 -13   1      40     430
   2 -13   1     237     460
   3 -13   1     230     450
   3 -13   1      37     430
   4 -13   1       1     410
   4 -13   1     390     480
   5  12  -1    1635     580
   5  12  -1     201     460
   4  12  -1     974     490
   4  12  -1    1692     560
   3  12  -1    3821     640
   3  12  -1    4932     560
   2  12  -1    2221     550
   2  12  -1    3021     470
  -2 -12   1    3084     470
  -2 -12   1    1487     460
   1  12  -1    4421     500
   1  12  -1    3158     640
  -1 -12   1    3360     520
  -1 -12   1    4325     560
   0  12  -1    5047     650
   0  12  -1    6319     530
   0 -12   1    7142     620
   0 -12   1    5494     580
  -1  12  -1    3097     430
  -1  12  -1    2991     580
   1 -12   1    4032     570
   1 -12   1    4109     550
   2 -12   1    3016     500
   2 -12   1    2131     470
   3 -12   1    3744     520
   3 -12   1    6000     640
   4 -12   1    1294     460
   4 -12   1    2374     520
   5 -12   1    1120     480
   5 -12   1    1043     460
   5 -12   1    1859     440
   6 -12   1    1637     520
   7  11  -1     313     550
   7  11  -1      28     520
   6  11  -1      72     490
   6  11  -1     435     480
   5  11  -1     399     430
   5  11  -1     153     460
   4  11  -1     743     500
   4  11  -1    1555     460
   3  11  -1     404     380
   3  11  -1     107     440
  -3 -11   1     435     340
   2  11  -1     337     440
   2  11  -1     686     360
  -2 -11   1     148     360
  -2 -11   1     258     340
   1  11  -1       0     300
   1  11  -1     391     420
  -1 -11   1     274     360
  -1 -11   1     449     360
  -1  11  -1       0     270
  -1  11  -1     772     450
   1 -11   1     254     360
   1 -11   1       7     350
  -2  11  -1     317     270
  -2  11  -1     288     390
   2 -11   1     298     370
   2 -11   1     467     360
   2 -11   1     268     230
   3 -11   1      63     360
   3 -11   1     172     260
   3 -11   1     246     390
   4 -11   1    1048     440
   4 -11   1     328     390
   4 -11   1     731     330
   5 -11   1       0     370
   5 -11   1       0     380
   5 -11   1       0     310
   6 -11   1     204     430
   6 -11   1       0     340
   6 -11   1       0     390
   7 -11   1     868     420
   7 -11   1    1120     490
   7 -11   1    1014     440
   8  10  -1     224     540
   8  10  -1      49     500
   7  10  -1     216     480
   7  10  -1     833     500
   6  10  -1    1103     490
   6  10  -1    1972     490
   5  10  -1    1509     430
   5  10  -1    1122     470
   4  10  -1    2438     460
   4  10  -1    3442     460
  -4 -10   1    2529     350
   3  10  -1      44     400
   3  10  -1     432     370
  -3 -10   1     542     330
   2  10  -1    1018     430
   2  10  -1    2071     360
  -2 -10   1    2291     370
  -2 -10   1    1917     380
   1  10  -1    3861     420
   1  10  -1    3467     530
  -1 -10   1    3938     470
  -1 -10   1    4784     490
   0  10  -1    3830     380
   0  10  -1    3314     460
   0 -10   1    4474     450
   0 -10   1    3458     420
  -1  10  -1    2013     470
  -1  10  -1    3897     380
   1 -10   1    4716     500
   1 -10   1    3359     310
   1 -10   1    3081     430
  -2  10  -1    2603     490
  -2  10  -1    2396     290
   2 -10   1    2308     280
   2 -10   1    2155     370
   2 -10   1    2232     410
  -3  10  -1     407     230
   3 -10   1      52     340
   3 -10   1     240     350
   3 -10   1     104     260
   4 -10   1    2277     410
   4 -10   1    2563     420
   4 -10   1    2540     350
   5 -10   1    1561     360
   5 -10   1    1939     430
   5 -10   1    1412     420
   6 -10   1     926     360
   6 -10   1     564     390
   6 -10   1    1367     420
   7 -10   1     341     380
   7 -10   1     132     380
   7 -10   1    1080     420
   8 -10   1       0     410
   8 -10   1      50     360
   8 -10   1      50     400
   8   9  -1     558     470
   8   9  -1      28     430
   7   9  -1     781     450
   7   9  -1     771     450
   6   9  -1    2188     500
   6   9  -1    3408     470
   5   9  -1     790     390
   5   9  -1     849     410
   4   9  -1      18     300
   4   9  -1     646     380
  -4  -9   1       1     250
   3   9  -1       5     340
   3   9  -1     190     310
  -3  -9   1     260     270
   2   9  -1     539     310
   2   9  -1     474     340
  -2  -9   1     364     310
  -2  -9   1     220     280
   1   9  -1       1     250
   1   9  -1     124     360
  -1  -9   1     805     300
  -1  -9   1      27     280
  -1   9  -1      88     360
  -1   9  -1      61     210
   1  -9   1      44     170
   1  -9   1     263     300
   1  -9   1      36     300
  -2   9  -1     361     220
  -2   9  -1     379     340
   2  -9   1     452     330
   2  -9   1     148     310
   2  -9   1     407     220
  -3   9  -1       5     180
   3  -9   1       5     310
   3  -9   1       5     230
   3  -9   1       2     300
  -4   9  -1     133     150
   4  -9   1       1     260
   4  -9   1      89     330
   4  -9   1       1     310
   5  -9   1     245     300
   5  -9   1     871     360
   5  -9   1      43     310
   6  -9   1    2326     420
   6  -9   1    2899     440
   6  -9   1    2524     410
   7  -9   1    1116     380
   7  -9   1     800     360
   7  -9   1     401     350
   8  -9   1     854     370
   8  -9   1     389     430
   8  -9   1     688     420
   9   8  -1     342     470
   9   8  -1     130     470
   8   8  -1      67     410
   8   8  -1      50     430
   7   8  -1     715     420
   7   8  -1    1032     450
   6   8  -1    1114     390
   6   8  -1    1648     420
   5   8  -1     219     360
   5   8  -1     112     330
  -5  -8   1     338     220
   4   8  -1    1820     370
   4   8  -1    1623     400
  -4  -8   1    1048     270
   3   8  -1     619     330
   3   8  -1     684     290
  -3  -8   1     798     270
   2   8  -1     753     250
   2   8  -1    1009     310
  -2  -8   1     908     260
  -2  -8   1     701     260
   1   8  -1    1604     260
   1   8  -1    1882     310
  -1  -8   1    1119     260
  -1  -8   1     961     270
   0   8  -1    6846     570
   0   8  -1    6628     460
   0  -8   1    7131     540
   0  -8   1    6562     350
   0  -8   1    6969     510
  -1   8  -1     642     200
  -1   8  -1     920     300
   1  -8   1     719     280
   1  -8   1     732     180
   1  -8   1    1604     300
  -2   8  -1     464     180
  -2   8  -1     902     330
   2  -8   1     520     260
   2  -8   1    1323     290
   2  -8   1     377     190
  -3   8  -1     564     190
   3  -8   1    1227     330
   3  -8   1     258     250
   3  -8   1     709     310
  -4   8  -1    1442     170
   4  -8   1    1210     340
   4  -8   1    1488     310
   4  -8   1     935     310
   5  -8   1      95     290
   5  -8   1     167     300
   5  -8   1     217     310
   6  -8   1    1387     350
   6  -8   1    1849     380
   6  -8   1    1220     330
   7  -8   1     596     340
   7  -8   1     414     350
   7  -8   1    1181     400
   8  -8   1       3     380
   8  -8   1     113     320
   8  -8   1      75     380
   9  -8   1      57     300
   9  -8   1     108     390
   9  -8   1     316     410
   9   7  -1    1584     480
   9   7  -1     495     420
   8   7  -1    2190     480
   8   7  -1     685     420
   7   7  -1    2247     420
   7   7  -1    1008     390
   7   7  -1    1832     260
   6   7  -1      55     330
   6   7  -1     130     170
   6   7  -1       1     330
   5   7  -1     629     140
   5   7  -1     500     320
   5   7  -1    1029     350
  -5  -7   1     659     200
   4   7  -1     981     310
   4   7  -1     681     310
  -4  -7   1     971     230
   3   7  -1     564     260
   3   7  -1     355     270
  -3  -7   1     236     200
   2   7  -1     462     220
   2   7  -1     697     280
   1   7  -1      92     230
   1   7  -1     337     210
  -1  -7   1     309     220
  -1  -7   1     319     210
  -1   7  -1     299     260
  -1   7  -1     354     160
   1  -7   1     144     220
   1  -7   1      91     140
   1  -7   1     135     220
  -2   7  -1     591     280
  -2   7  -1      82     150
   2  -7   1     508     240
   2  -7   1      13     160
   2  -7   1     129     130
   2  -7   1      13     240
  -3   7  -1     514     140
   3  -7   1     523     120
   3  -7   1     593     260
   3  -7   1     553     270
   3  -7   1     216     210
  -4   7  -1    1151     130
   4  -7   1     260     250
   4  -7   1     811     260
   4  -7   1     571     270
   5  -7   1     390     280
   5  -7   1     590     300
   5  -7   1     410     300
   6  -7   1     335     330
   6  -7   1     234     310
   6  -7   1     597     290
   7  -7   1    1819     380
   7  -7   1    1694     320
   7  -7   1    1286     390
   8  -7   1     811     390
   8  -7   1    1132     320
   8  -7   1    1220     400
   9  -7   1    1445     440
   9  -7   1    1577     330
   9  -7   1    1598     450
  10   6  -1     466     330
  10   6  -1      43     430
  10   6  -1      43     390
   9   6  -1     529     430
   9   6  -1     673     440
   9   6  -1     317     310
   8   6  -1    2802     330
   8   6  -1    2534     470
   8   6  -1    3462     470
   7   6  -1    2473     460
   7   6  -1    2607     320
   7   6  -1    2258     440
   6   6  -1    2192     240
   6   6  -1    2042     350
   6   6  -1    2658     380
  -6  -6   1    2192     200
   5   6  -1   10430     640
   5   6  -1    9394     460
   5   6  -1    9912     640
  -5  -6   1    8935     470
   4   6  -1    5003     250
   4   6  -1    4934     410
   4   6  -1    4537     430
  -4  -6   1    4547     330
   3   6  -1    7601     460
   3   6  -1    7667     450
  -3  -6   1    7369     380
   2   6  -1   13822     760
   2   6  -1   14438     670
   2   6  -1   14291     700
  -2  -6   1   14650     690
  -2  -6   1   14217     710
   1   6  -1    5650     280
   1   6  -1    5391     340
   1   6  -1    5280     290
  -1  -6   1    5006     310
  -1  -6   1    5317     300
   0   6  -1     126     180
   0   6  -1     135     170
   0   6  -1     383     200
   0  -6   1     109     190
   0  -6   1     124     210
   0  -6   1     146     100
  -1   6  -1    5501     260
  -1   6  -1    4287     300
   1  -6   1    5735     310
   1  -6   1    5427     330
   1  -6   1    4704     240
   1  -6   1    4044     270
   1  -6   1    5042     250
  -2   6  -1   14514     620
  -2   6  -1   13935     770
   2  -6   1   14266     700
   2  -6   1   15095     750
   2  -6   1   14975     610
   2  -6   1   14340     710
   2  -6   1   14717     750
  -3   6  -1    6697     270
   3  -6   1    7351     260
   3  -6   1    6963     410
   3  -6   1    7274     420
   3  -6   1    7551     440
   3  -6   1    6975     430
   4  -6   1    5421     420
   4  -6   1    4307     400
   4  -6   1    5232     430
   4  -6   1    5103     220
   4  -6   1    4953     420
   5  -6   1    7877     640
   5  -6   1    9816     560
   5  -6   1    9577     590
   5  -6   1    9404     600
   6  -6   1    1735     320
   6  -6   1    2507     370
   6  -6   1    1887     300
   6  -6   1    2914     310
   7  -6   1    1752     410
   7  -6   1    1629     350
   7  -6   1    1656     320
   8  -6   1    2981     440
   8  -6   1    2607     430
   8  -6   1    2617     330
   9  -6   1     332     270
   9  -6   1     851     430
   9  -6   1      78     320
  10  -6   1     305     250
  10  -6   1    1196     460
  10  -6   1      44     380
  10   5  -1     156     310
  10   5  -1     573     430
  10   5  -1     303     400
  10   5  -1     381     340
   9   5  -1      76     370
   9   5  -1     422     310
   9   5  -1     683     360
   9   5  -1     257     290
   8   5  -1     422     330
   8   5  -1     495     330
   8   5  -1     527     270
   7   5  -1     596     230
   7   5  -1     773     310
   7   5  -1     540     300
   6   5  -1    3398     310
   6   5  -1    2498     370
   6   5  -1    3638     420
  -6  -5   1    3128     220
   5   5  -1    1963     300
   5   5  -1    1372     260
   5   5  -1    1183     200
  -5  -5   1    1327     160
   4   5  -1    1513     280
   4   5  -1    1704     230
   4   5  -1    1284     170
   4   5  -1    1714     280
  -4  -5   1    1609     190
   3   5  -1    1693     230
   3   5  -1    1223     150
   3   5  -1    1572     280
   3   5  -1    1358     280
  -3  -5   1    1701     210
  -3  -5   1    1753     220
   2   5  -1    3728     240
   2   5  -1    3102     280
   2   5  -1    3136     260
  -2  -5   1    3365     270
  -2  -5   1    4067     240
  -2  -5   1    3456     240
   1   5  -1    4068     370
   1   5  -1    3512     320
   1   5  -1    4329     300
  -1  -5   1    3827     330
  -1  -5   1    4542     350
  -1  -5   1    3632     300
  -1  -5   1    4310     300
  -1   5  -1    3698     250
  -1   5  -1    4804     320
  -1   5  -1    4134     370
   1  -5   1    4134     320
   1  -5   1    3522     250
   1  -5   1    4190     330
   1  -5   1    4004     270
   1  -5   1    3967     330
   1  -5   1    3763     340
  -2   5  -1    4147     270
  -2   5  -1    3002     280
  -2   5  -1    3299     180
   2  -5   1    3002     250
   2  -5   1    2760     250
   2  -5   1    3288     240
   2  -5   1    3662     270
   2  -5   1    2956     280
   2  -5   1    3105     180
  -3   5  -1    1339     140
   3  -5   1    1656     260
   3  -5   1    1382     150
   3  -5   1    1734     270
   3  -5   1    1804     270
   3  -5   1    1305     240
   4  -5   1    1679     230
   4  -5   1    1469     280
   4  -5   1    2072     270
   4  -5   1    1813     280
   5  -5   1    2193     300
   5  -5   1    1920     310
   5  -5   1    1668     230
   5  -5   1    1833     250
   6  -5   1    2822     400
   6  -5   1    3042     330
   6  -5   1    3791     410
   6  -5   1    3132     320
   7  -5   1     494     260
   7  -5   1     180     290
   7  -5   1     471     220
   7  -5   1     437     110
   8  -5   1     122     210
   8  -5   1     849     320
   8  -5   1     442     380
   9  -5   1     538     360
   9  -5   1     326     380
   9  -5   1     257     230
  10  -5   1     184     220
  10  -5   1     516     390
  10  -5   1     396     420
  10   4  -1      16     290
  10   4  -1     193     330
  10   4  -1      16     310
  10   4  -1      50     370
   9   4  -1    2659     470
   9   4  -1    2117     420
   9   4  -1    2059     380
   9   4  -1    2911     420
   8   4  -1    1542     360
   8   4  -1    1343     300
   8   4  -1    1751     320
   8   4  -1    2197     360
   7   4  -1    2705     420
   7   4  -1    2425     410
   7   4  -1    2864     370
   6   4  -1    8089     450
   6   4  -1    8413     510
   6   4  -1    8424     510
   5   4  -1    2485     340
   5   4  -1    2640     340
   5   4  -1    2675     280
  -5  -4   1    2125     200
  -5  -4   1    2313     190
   4   4  -1   15871     670
   4   4  -1   15931     610
   4   4  -1   16194     690
  -4  -4   1   17013     700
  -4  -4   1   15679     580
  -4  -4   1   15053     570
   3   4  -1   56760    1830
   3   4  -1   56121    1920
   3   4  -1   58242    1780
   3   4  -1   56548    1820
  -3  -4   1   58333    1920
  -3  -4   1   54456    1840
  -3  -4   1   56507    1840
   2   4  -1   46947    1700
   2   4  -1   47814    1570
   2   4  -1   45525    1600
  -2  -4   1   43830    1640
   1   4  -1   15210     610
   1   4  -1   16409     590
   1   4  -1   15927     670
  -1  -4   1   14935     630
  -1  -4   1   15760     600
   0   4  -1   25265     760
   0   4  -1   26819     770
   0   4  -1   24589     840
   0  -4   1   25469     750
   0  -4   1   23998     820
   0  -4   1   25995     780
   0  -4   1   24718     760
   0  -4   1   26434     820
  -1   4  -1   15828     670
  -1   4  -1   15190     560
  -1   4  -1   16222     610
   1  -4   1   16398     670
   1  -4   1   16349     620
   1  -4   1   15671     650
   1  -4   1   16025     570
   1  -4   1   15150     640
   1  -4   1   15710     610
  -2   4  -1   43157    1580
  -2   4  -1   45671    1520
   2  -4   1   46831    1590
   2  -4   1   45037    1670
   2  -4   1   45739    1510
   2  -4   1   47114    1670
   2  -4   1   47406    1700
   2  -4   1   46968    1670
   3  -4   1   61161    1960
   3  -4   1   56474    1910
   3  -4   1   56362    1730
   3  -4   1   55205    1820
   3  -4   1   59639    1910
   3  -4   1   56119    1940
   4  -4   1   15756     500
   4  -4   1   15341     630
   4  -4   1   15463     680
   4  -4   1   14635     630
   4  -4   1   15847     700
   4  -4   1   14797     640
   5  -4   1    2166     270
   5  -4   1    2252     350
   5  -4   1    3169     350
   5  -4   1    2466     280
   5  -4   1    1954     180
   6  -4   1    7540     440
   6  -4   1    7955     290
   6  -4   1    7843     300
   6  -4   1    6502     470
   6  -4   1    8470     420
   6  -4   1    8011     400
   7  -4   1    3055     480
   7  -4   1    2808     310
   7  -4   1    2615     400
   7  -4   1    2905     260
   7  -4   1    2597     250
   7  -4   1    2388     310
   8  -4   1    1562     350
   8  -4   1    1240     380
   8  -4   1    1584     190
   8  -4   1    1441     230
   9  -4   1    2641     300
   9  -4   1    3028     520
   9  -4   1    3261     470
  10  -4   1      16     350
  10  -4   1      16     350
  10  -4   1     208     190
  11   3  -1     108     350
  11   3  -1     704     430
  11   3  -1     602     380
  11   3  -1     435     360
  10   3  -1    1873     390
  10   3  -1    1579     410
  10   3  -1    1786     380
  10   3  -1    1797     370
   9   3  -1    4646     470
   9   3  -1    4467     490
   9   3  -1    4328     500
   9   3  -1    3631     440
   8   3  -1    3379     430
   8   3  -1    2715     430
   8   3  -1    3251     420
   8   3  -1    3187     410
   7   3  -1    2350     330
   7   3  -1    2153     300
   7   3  -1    2273     340
   7   3  -1    1844     310
   6   3  -1    4643     370
   6   3  -1    4182     370
   6   3  -1    4080     380
   5   3  -1    1513     230
   5   3  -1    1559     270
   5   3  -1    1812     280
   4   3  -1    1433     210
   4   3  -1    1204     160
   4   3  -1    1037     200
  -4  -3   1     952      90
   3   3  -1     515     180
  -3  -3   1     282      90
  -3  -3   1       0      80
   2   3  -1    1189     150
   2   3  -1    1075     210
   2   3  -1    1175     210
   2   3  -1    1533     210
  -2  -3   1    1661     230
  -2  -3   1    1623     190
  -2  -3   1    1452     190
   1   3  -1    4653     200
   1   3  -1    5052     230
   1   3  -1    4489     220
  -1  -3   1    4865     240
  -1  -3   1    4084     200
  -1  -3   1    4160     190
  -1  -3   1    3918     180
  -1   3  -1    5248     250
  -1   3  -1    4122     160
  -1   3  -1    4438     200
   1  -3   1    3892     200
   1  -3   1    5075     260
   1  -3   1    4727     210
   1  -3   1    4096     160
   1  -3   1    4236     210
  -2   3  -1    1556     130
   2  -3   1    1118     200
   2  -3   1    1965     240
   2  -3   1    1653     250
   2  -3   1    1182     220
   2  -3   1    1504     130
  -3   3  -1      23      80
   3  -3   1     300     150
   3  -3   1     355     170
  -4   3  -1    1702     210
   4  -3   1    1505     160
   4  -3   1    1154     110
   4  -3   1    1291     170
   4  -3   1    1805     190
   5  -3   1    2011     310
   5  -3   1    1487     200
   5  -3   1    1487     160
   5  -3   1    1842     270
   5  -3   1    1590     200
   6  -3   1    4327     260
   6  -3   1    4265     290
   6  -3   1    5492     460
   6  -3   1    4583     380
   6  -3   1    4593     260
   6  -3   1    4511     320
   7  -3   1    2055     370
   7  -3   1    1647     200
   7  -3   1    1758     210
   7  -3   1    2274     340
   7  -3   1    1824     200
   8  -3   1    2793     280
   8  -3   1    2558     440
   8  -3   1    3779     460
   8  -3   1    2694     280
   9  -3   1    3695     470
   9  -3   1    4821     570
   9  -3   1    4532     330
  10  -3   1    1485     190
  10  -3   1    2473     460
  10  -3   1    1529     400
  11  -3   1     370     430
  11  -3   1     250     390
  11   2  -1       0     330
  11   2  -1     402     360
  11   2  -1       0     370
  11   2  -1     153     350
  10   2  -1     156     320
  10   2  -1       2     310
  10   2  -1     202     290
  10   2  -1      10     320
   9   2  -1    1025     300
   9   2  -1     769     310
   9   2  -1    1525     350
   9   2  -1    1048     330
   8   2  -1      34     270
   8   2  -1     269     280
   8   2  -1       7     260
   8   2  -1     500     270
   7   2  -1    2470     370
   7   2  -1    2567     400
   7   2  -1    3040     370
   7   2  -1    3238     410
   6   2  -1    2037     270
   6   2  -1    1362     240
   6   2  -1    1868     270
   6   2  -1    1587     240
   5   2  -1   11419     550
   5   2  -1   10857     530
   5   2  -1   10502     560
   4   2  -1   21225     770
   4   2  -1   17752     800
   4   2  -1   20315     790
   3   2  -1   10451     420
   3   2  -1   11562     460
  -3  -2   1   12797     360
   2   2  -1   22207     790
   2   2  -1   19062     780
  -2  -2   1   19590     760
  -2  -2   1   16542     760
   1   2  -1   85752    2650
   1   2  -1   90321    2850
   1   2  -1   86122    2690
   1   2  -1   82164    2800
   1   2  -1   82824    2800
  -1  -2   1   87711    2660
  -1  -2   1   93220    2850
  -1  -2   1   83163    2800
  -1  -2   1   84343    2800
   0   2  -1   95088    2890
   0   2  -1   94779    2740
   0   2  -1   94810    2920
   0   2  -1   95634    2720
   0  -2   1   93935    2740
   0  -2   1   90650    2880
   0  -2   1   92143    2720
  -1   2  -1   86737    2810
  -1   2  -1   82818    2770
  -1   2  -1   84348    2610
   1  -2   1   83628    2770
   1  -2   1   85687    2630
   1  -2   1   84658    2780
   1  -2   1   84158    2610
   1  -2   1   87237    2810
  -2   2  -1   18503     730
   2  -2   1   18558     740
   2  -2   1   16298     760
   2  -2   1   21107     680
   2  -2   1   16464     760
   3  -2   1    7768     310
   3  -2   1    6988     300
   3  -2   1    9034     350
  -4   2  -1   14725     600
   4  -2   1   13285     560
   4  -2   1   13591     560
   4  -2   1   15002     610
   5  -2   1    9268     430
   5  -2   1   11158     530
   5  -2   1   10015     440
   6  -2   1    2266     320
   6  -2   1    2456     280
   6  -2   1    1775     170
   6  -2   1    1677     180
   6  -2   1    1665     160
   7  -2   1    2578     240
   7  -2   1    2364     430
   7  -2   1    2899     370
   7  -2   1    2667     240
   7  -2   1    2908     280
   8  -2   1     295     200
   8  -2   1     186     280
   8  -2   1      51     130
   8  -2   1       8     130
   8  -2   1       8     310
   9  -2   1    1256     240
   9  -2   1    1245     340
   9  -2   1    1040     360
   9  -2   1    1154     140
  10  -2   1       1     350
  10  -2   1     269     340
  11  -2   1     742     420
  11  -2   1      59     360
  11   1  -1    4524     520
  11   1  -1    5202     600
  11   1  -1    4332     490
  11   1  -1    4656     570
  10   1  -1    6518     600
  10   1  -1    6198     620
  10   1  -1    5362     510
  10   1  -1    5859     610
   9   1  -1    6685     550
   9   1  -1    6922     490
   9   1  -1    7889     590
   9   1  -1    8125     560
   8   1  -1   18420     930
   8   1  -1   17479     970
   8   1  -1   17368     890
   8   1  -1   17719     990
   7   1  -1   35395    1200
   7   1  -1   36937    1200
   7   1  -1   35808    1100
   7   1  -1   37539    1110
   6   1  -1   50889    1730
   6   1  -1   50919    1860
   6   1  -1   48098    1720
   5   1  -1   66041    2590
   5   1  -1   68681    2790
   4   1  -1   72714    1840
   4   1  -1   71025    1710
   2   1  -1   69852    2450
   2   1  -1   64581    2370
  -2  -1   1   69401    2370
  -2  -1   1   66900    2370
   1   1  -1   23917     370
   1   1  -1   23825     340
   1   1  -1   23840     350
  -1  -1   1   24101     370
  -1  -1   1   23440     340
  -1   1  -1   25051     370
   1  -1   1   23646     360
   1  -1   1   24366     370
  -2   1  -1   68394    2460
  -2   1  -1   69698    2350
   2  -1   1   70485    2350
   2  -1   1   68788    2460
   2  -1   1   70091    2460
  -3   1  -1   83880    3260
   3  -1   1   84880    3260
   3  -1   1   81277    3400
   3  -1   1   83355    3400
  -4   1  -1   73643    1750
   4  -1   1   71350    1760
   4  -1   1   72654    1770
   4  -1   1   72398    1750
   5  -1   1   64974    2590
   5  -1   1   69068    2640
   5  -1   1   66437    2640
   5  -1   1   66401    2550
   6  -1   1   50332    1760
   6  -1   1   51772    1770
   6  -1   1   55008    1960
   6  -1   1   51753    1800
   6  -1   1   51309    1740
   7  -1   1   38162    1020
   7  -1   1   36108    1070
   7  -1   1   37760    1150
   7  -1   1   36935    1250
   7  -1   1   36354    1010
   8  -1   1   17384    1000
   8  -1   1   16766     810
   8  -1   1   16371     890
   9  -1   1    6607     450
   9  -1   1    7102     560
   9  -1   1    6877     580
  10  -1   1    5307     570
  10  -1   1    5682     510
  10  -1   1    5372     630
  11  -1   1    4507     540
  11  -1   1    4537     600
  11  -1  -1    6011     660
  11  -1  -1    4373     540
  10  -1  -1    5421     560
  10  -1  -1    6455     530
  10  -1  -1    6031     650
   9  -1  -1    7300     540
   9  -1  -1    7343     480
   9  -1  -1    7537     620
   8  -1  -1   16806     810
   8  -1  -1   17091     920
   8  -1  -1   17110    1000
   7  -1  -1   34954    1220
   7  -1  -1   37446    1000
   7  -1  -1   36598    1060
   7  -1  -1   36184    1120
   7  -1  -1   36910    1000
   6  -1  -1   50804    1760
   6  -1  -1   49936    1790
   6  -1  -1   53684    1760
   6  -1  -1   52136    1940
   5  -1  -1   70543    2740
   5  -1  -1   67909    2680
   5  -1  -1   71965    2900
   5  -1  -1   68956    2740
   4  -1  -1   70909    1740
   4  -1  -1   71143    1720
   4  -1  -1   72622    1850
   4  -1  -1   72936    1750
  -4   1   1   71807    1720
   3  -1  -1   82276    3330
   3  -1  -1   78085    3190
   3  -1  -1   79979    3330
   3  -1  -1   84023    3430
  -3   1   1   83168    3200
   2  -1  -1   70161    2330
   2  -1  -1   69154    2500
   2  -1  -1   67515    2440
  -2   1   1   69336    2330
  -2   1   1   68925    2440
   1  -1  -1   23618     340
   1  -1  -1   23864     380
   1  -1  -1   23526     360
   1  -1  -1   24491     350
  -1   1   1   24094     360
  -1   1   1   24962     360
  -1   1   1   24002     340
  -1  -1  -1   24903     370
  -1  -1  -1   24248     360
  -1  -1  -1   23834     350
   1   1   1   24172     360
   1   1   1   23926     350
   1   1   1   23619     370
  -2  -1  -1   70846    2450
   2   1   1   69963    2450
   2   1   1   69435    2380
   2   1   1   70078    2520
   3   1   1   80705    3190
   3   1   1   80866    3380
   4   1   1   70499    1690
   5   1   1   67523    2570
   5   1   1   64922    2570
   6   1   1   52471    1900
   6   1   1   50380    1780
   6   1   1   51406    1770
   7   1   1   35579    1120
   7   1   1   36206    1090
   7   1   1   36351    1210
   7   1   1   37367    1180
   8   1   1   16992     890
   8   1   1   16109     950
   8   1   1   16716     930
   8   1   1   16753     850
   9   1   1    8029     580
   9   1   1    7386     570
   9   1   1    8756     540
   9   1   1    6827     540
  10   1   1    5192     590
  10   1   1    5126     500
  10   1   1    5642     580
  10   1   1    6498     650
  11   1   1    4244     530
  11   1   1    4153     540
  11   1   1    4041     460
  11   1   1    5620     620
  11  -2  -1      41     370
  11  -2  -1     520     410
  10  -2  -1       2     320
  10  -2  -1       2     360
   9  -2  -1    1412     330
   9  -2  -1    1128     140
   9  -2  -1    1288     250
   9  -2  -1    1480     370
   8  -2  -1     245     280
   8  -2  -1     257     130
   8  -2  -1     172     210
   8  -2  -1     409     330
   8  -2  -1     184     130
   7  -2  -1    2749     440
   7  -2  -1    2287     230
   7  -2  -1    2499     240
   7  -2  -1    2588     360
   6  -2  -1    1373     280
   6  -2  -1    1866     160
   6  -2  -1    1926     170
   6  -2  -1    1572     240
   5  -2  -1   10185     490
   5  -2  -1   10747     570
   5  -2  -1    9260     420
   5  -2  -1    9821     430
   4  -2  -1   14630     590
   4  -2  -1   13366     540
   4  -2  -1   13287     540
   4  -2  -1   13159     640
  -4   2   1   14245     590
   3  -2  -1    8619     380
   3  -2  -1    8706     280
   3  -2  -1    7964     310
   3  -2  -1    8051     330
   3  -2  -1    6779     310
   2  -2  -1   16629     710
   2  -2  -1   16979     650
   2  -2  -1   16730     700
   2  -2  -1   16666     750
  -2   2   1   17283     710
  -2   2   1   17634     700
   1  -2  -1   83325    2790
   1  -2  -1   83975    2640
   1  -2  -1   85134    2820
   1  -2  -1   86804    2650
  -1   2   1   87734    2650
  -1   2   1   85894    2640
   0  -2  -1   93967    2710
   0  -2  -1   93833    2900
   0  -2  -1   92505    2720
   0  -2  -1   90631    2870
   0  -2  -1   93452    2870
   0   2   1   94080    2870
   0   2   1   90981    2720
   0   2   1   94822    2900
   0   2   1   94842    2870
  -1  -2  -1   87642    2810
  -1  -2  -1   81964    2770
   1   2   1   86192    2630
   1   2   1   85443    2810
   1   2   1   83524    2770
   1   2   1   85333    2650
  -2  -2  -1   16699     680
  -2  -2  -1   17215     720
   2   2   1   17400     730
   2   2   1   15358     690
   2   2   1   16764     680
  -3  -2  -1    7183     250
  -3  -2  -1    8300     260
   3   2   1    8704     260
   3   2   1    7348     350
   3   2   1    8813     360
   4   2   1   15494     630
   4   2   1   13106     600
   5   2   1    9756     510
   5   2   1   11588     540
   6   2   1    1605     240
   6   2   1    1518     250
   7   2   1    2117     330
   7   2   1    2935     380
   7   2   1    2223     360
   7   2   1    1871     380
   8   2   1       7     260
   8   2   1      66     270
   8   2   1       7     240
   8   2   1       7     270
   9   2   1    1483     310
   9   2   1    1662     360
   9   2   1     739     320
   9   2   1    1939     360
  10   2   1       1     300
  10   2   1     288     330
  10   2   1       1     320
  10   2   1     382     320
  11   2   1     199     380
  11   2   1       1     340
  11   2   1     276     370
  11   2   1     877     390
  11  -3  -1     226     360
  11  -3  -1      20     450
  10  -3  -1    1808     390
  10  -3  -1    2123     460
   9  -3  -1    3775     330
   9  -3  -1    3398     500
   9  -3  -1    3437     460
   9  -3  -1    4611     310
   8  -3  -1    2962     410
   8  -3  -1    3300     480
   8  -3  -1    3172     310
   8  -3  -1    2908     300
   7  -3  -1    1804     220
   7  -3  -1    1882     200
   7  -3  -1    1970     370
   7  -3  -1    2091     220
   7  -3  -1    2245     330
   6  -3  -1    5180     320
   6  -3  -1    5414     290
   6  -3  -1    4443     380
   6  -3  -1    4607     310
   6  -3  -1    4678     430
   5  -3  -1    1566     210
   5  -3  -1    1640     170
   5  -3  -1    1594     210
   5  -3  -1    1278     270
   5  -3  -1    1706     250
   4  -3  -1     966     160
   4  -3  -1     880     160
   4  -3  -1    1009     190
   4  -3  -1     820     220
   4  -3  -1    1177     120
  -4   3   1     451     160
   3  -3  -1     374     100
   3  -3  -1     249     150
   3  -3  -1     479     150
   3  -3  -1     603     180
   3  -3  -1     311     140
  -3   3   1     182     150
   2  -3  -1    1536     160
   2  -3  -1    1206     210
   2  -3  -1    1663     240
   2  -3  -1    1708     250
   2  -3  -1    1723     220
  -2   3   1    1514     170
   1  -3  -1    4323     170
   1  -3  -1    5247     230
   1  -3  -1    4763     210
   1  -3  -1    4030     210
  -1   3   1    3979     200
  -1   3   1    4562     180
  -1   3   1    4030     220
  -1  -3  -1    4914     230
  -1  -3  -1    5297     240
  -1  -3  -1    5763     250
  -1  -3  -1    5519     240
   1   3   1    5075     230
   1   3   1    5038     240
   1   3   1    5788     270
   1   3   1    5137     230
  -2  -3  -1    1505     190
  -2  -3  -1    1270     200
   2   3   1    1639     230
   2   3   1    1700     240
   2   3   1    1520     220
   2   3   1    1565     200
  -3  -3  -1     134      90
  -3  -3  -1     409     100
  -3  -3  -1      43     100
   3   3   1     214     150
   3   3   1     191     150
   3   3   1     329     110
  -4  -3  -1    1090      90
  -4  -3  -1    1418     100
   4   3   1    1270     200
   4   3   1    1090     210
   5   3   1    1602     250
   5   3   1    1398     250
   6   3   1    5200     410
   6   3   1    4791     390
   6   3   1    4822     380
   7   3   1    2217     330
   7   3   1    1987     320
   7   3   1    1679     300
   8   3   1    2495     390
   8   3   1    3523     430
   8   3   1    3504     420
   8   3   1    2396     410
   9   3   1    4221     450
   9   3   1    3434     450
   9   3   1    3384     440
   9   3   1    4151     490
  10   3   1    2516     420
  10   3   1    2225     420
  10   3   1    1364     370
  10   3   1    2182     400
  11   3   1     338     400
  11   3   1      20     370
  11   3   1     411     380
  11   3   1     258     360
  10  -4  -1     247     390
  10  -4  -1     523     190
  10  -4  -1      70     330
   9  -4  -1    2106     480
   9  -4  -1    2910     450
   9  -4  -1    2638     300
   8  -4  -1    1689     360
   8  -4  -1    1722     200
   8  -4  -1    1667     240
   8  -4  -1    1247     330
   7  -4  -1    2346     430
   7  -4  -1    2854     320
   7  -4  -1    2969     280
   7  -4  -1    2372     300
   7  -4  -1    2898     410
   6  -4  -1    8189     340
   6  -4  -1    8368     480
   6  -4  -1    8089     530
   6  -4  -1    8189     400
   6  -4  -1    7820     410
   5  -4  -1    2344     310
   5  -4  -1    2292     280
   5  -4  -1    2404     220
   5  -4  -1    3142     380
   5  -4  -1    2447     300
   4  -4  -1   15178     650
   4  -4  -1   15338     630
   4  -4  -1   15318     680
   4  -4  -1   15652     640
   4  -4  -1   15500     530
   3  -4  -1   56754    1800
   3  -4  -1   56623    1930
   3  -4  -1   58977    1880
   3  -4  -1   56967    1720
   3  -4  -1   54531    1910
   3  -4  -1   55201    1880
  -3   4   1   55993    1730
  -3   4   1   57800    1810
   2  -4  -1   45583    1590
   2  -4  -1   44862    1530
   2  -4  -1   47494    1670
   2  -4  -1   44541    1670
   2  -4  -1   47816    1680
   2  -4  -1   47816    1710
  -2   4   1   44833    1540
   1  -4  -1   14712     600
   1  -4  -1   15565     620
   1  -4  -1   15202     550
   1  -4  -1   15457     590
   1  -4  -1   14124     630
  -1   4   1   15124     630
  -1   4   1   15683     650
  -1   4   1   15536     560
  -1   4   1   14996     590
   0  -4  -1   23511     750
   0  -4  -1   23791     730
   0  -4  -1   24662     740
   0  -4  -1   24759     790
   0   4   1   25199     730
   0   4   1   24652     750
   0   4   1   24952     790
   0   4   1   24329     810
  -1  -4  -1   14159     610
  -1  -4  -1   15904     600
  -1  -4  -1   16287     600
   1   4   1   16395     660
   1   4   1   14933     620
   1   4   1   14433     590
   1   4   1   15080     590
  -2  -4  -1   45793    1570
  -2  -4  -1   43376    1610
   2   4   1   43142    1570
   2   4   1   46466    1620
   2   4   1   45998    1660
   2   4   1   46359    1550
  -3  -4  -1   58751    1930
  -3  -4  -1   56782    1850
  -3  -4  -1   53900    1850
   3   4   1   56651    1860
   3   4   1   58315    1810
   3   4   1   57594    1930
   3   4   1   57147    1830
  -4  -4  -1   15431     570
  -4  -4  -1   15673     570
  -4  -4  -1   16259     670
   4   4   1   15390     670
   4   4   1   15149     650
  -5  -4  -1    2147     200
  -5  -4  -1    2189     190
   5   4   1    2593     330
   5   4   1    2464     330
   6   4   1    7008     430
   6   4   1    7481     450
   6   4   1    8846     480
   7   4   1    2592     370
   7   4   1    3155     430
   7   4   1    2899     420
   8   4   1    1981     360
   8   4   1    1586     360
   8   4   1    1497     320
   9   4   1    2058     400
   9   4   1    2251     400
   9   4   1    3024     450
   9   4   1    2898     430
  10   4   1      16     340
  10   4   1     221     330
  10   4   1     351     340
  10   4   1      16     350
  10  -5  -1      13     420
  10  -5  -1     109     230
  10  -5  -1      29     340
   9  -5  -1     326     370
   9  -5  -1     300     230
   9  -5  -1       0     330
   8  -5  -1     547     220
   8  -5  -1     132     340
   8  -5  -1     452     320
   7  -5  -1     573     230
   7  -5  -1     573     310
   7  -5  -1      64     300
   6  -5  -1    3325     340
   6  -5  -1    3086     230
   6  -5  -1    3335     380
   6  -5  -1    2576     290
   6  -5  -1    3116     400
   5  -5  -1    1375     240
   5  -5  -1    1508     290
   5  -5  -1    1695     250
   5  -5  -1    1596     250
   5  -5  -1    1607     140
   4  -5  -1    1319     250
   4  -5  -1    1328     240
   4  -5  -1    1261     240
   4  -5  -1    1682     140
   4  -5  -1     939     250
   3  -5  -1    1524     250
   3  -5  -1    1185     250
   3  -5  -1    1481     150
   3  -5  -1    2017     280
   3  -5  -1    1193     250
  -3   5   1    1558     160
   2  -5  -1    3871     280
   2  -5  -1    2984     230
   2  -5  -1    3178     260
   2  -5  -1    3338     190
   2  -5  -1    3916     300
   2  -5  -1    2961     250
  -2   5   1    2614     210
  -2   5   1    3167     240
  -2   5   1    3293     190
   1  -5  -1    3838     330
   1  -5  -1    3893     320
   1  -5  -1    3884     270
   1  -5  -1    3338     250
   1  -5  -1    3550     330
  -1   5   1    4125     320
  -1   5   1    3995     360
  -1   5   1    4219     310
  -1   5   1    4042     270
  -1  -5  -1    3827     310
  -1  -5  -1    3134     300
  -1  -5  -1    4514     310
  -1  -5  -1    4096     330
  -1  -5  -1    3567     290
   1   5   1    4207     310
   1   5   1    3614     350
   1   5   1    3614     310
   1   5   1    3771     290
  -2  -5  -1    3501     240
  -2  -5  -1    3376     260
  -2  -5  -1    3773     240
  -2  -5  -1    3319     250
   2   5   1    3444     240
   2   5   1    3010     230
   2   5   1    3694     270
   2   5   1    2802     270
  -3  -5  -1    1705     210
  -3  -5  -1    1533     200
  -3  -5  -1    1697     260
   3   5   1    1353     260
   3   5   1    1679     290
   3   5   1    1697     240
  -4  -5  -1    1444     180
   4   5   1    1472     260
   4   5   1    1549     290
  -5  -5  -1    1363     160
   5   5   1    1252     290
   5   5   1    1650     290
   5   5   1    1017     200
  -6  -5  -1    2931     210
   6   5   1    3031     380
   6   5   1    2831     300
   6   5   1    3061     390
   7   5   1     563     310
   7   5   1     289     230
   7   5   1     370     310
   8   5   1     673     330
   8   5   1      42     270
   8   5   1     839     340
   9   5   1     519     380
   9   5   1     265     300
   9   5   1     882     370
  10   5   1     273     400
  10   5   1       5     310
  10   5   1     516     410
  10   5   1     250     360
  10  -6  -1      43     390
  10  -6  -1      43     250
  10  -6  -1      43     390
   9  -6  -1     751     400
   9  -6  -1     239     260
   9  -6  -1     555     400
   8  -6  -1    2941     440
   8  -6  -1    2082     430
   8  -6  -1    3601     370
   7  -6  -1    2091     380
   7  -6  -1    2484     440
   7  -6  -1    1860     330
   6  -6  -1    1868     290
   6  -6  -1    2064     280
   6  -6  -1    2006     360
   6  -6  -1    2041     340
   6  -6  -1    2052     140
   5  -6  -1   10501     590
   5  -6  -1    8940     640
   5  -6  -1    9495     610
   5  -6  -1   10501     610
   5  -6  -1    9725     400
   4  -6  -1    4457     390
   4  -6  -1    4159     360
   4  -6  -1    4656     380
   4  -6  -1    5291     420
   4  -6  -1    4845     240
  -4   6   1    4855     250
   3  -6  -1    7415     430
   3  -6  -1    7437     280
   3  -6  -1    6649     420
   3  -6  -1    7304     430
   3  -6  -1    6760     410
  -3   6   1    7592     290
   2  -6  -1   14313     740
   2  -6  -1   14764     740
   2  -6  -1   14368     610
   2  -6  -1   13513     690
   2  -6  -1   14543     720
  -2   6   1   15225     630
   1  -6  -1    5655     270
   1  -6  -1    4785     300
   1  -6  -1    5507     310
   1  -6  -1    5222     310
   1  -6  -1    4911     260
  -1   6   1    5680     280
  -1   6   1    5433     350
  -1   6   1    5974     330
   0  -6  -1     112     210
   0  -6  -1     152     150
   0  -6  -1     141     110
   0  -6  -1     141     160
   0   6   1     117     150
   0   6   1     109     170
   0   6   1     117     210
   0   6   1     384     150
  -1  -6  -1    4526     290
  -1  -6  -1    5376     300
  -1  -6  -1    5770     290
   1   6   1    4979     270
   1   6   1    6125     330
   1   6   1    5881     300
   1   6   1    4904     310
  -2  -6  -1   14793     730
   2   6   1   15586     730
   2   6   1   15227     720
   2   6   1   14416     760
  -3  -6  -1    6958     370
   3   6   1    7809     440
   3   6   1    6958     440
  -4  -6  -1    4262     330
   4   6   1    4630     400
   4   6   1    5306     440
   4   6   1    5197     270
  -5  -6  -1    9163     480
   5   6   1   10216     640
   5   6   1    9517     480
   5   6   1    9813     630
  -6  -6  -1    2300     210
   6   6   1    1921     350
   6   6   1    2059     350
   6   6   1    2822     260
   7   6   1    2941     460
   7   6   1    2508     440
   7   6   1    2535     320
   8   6   1    2424     430
   8   6   1    4010     490
   8   6   1    3332     350
   9   6   1     629     310
   9   6   1     487     410
   9   6   1     405     410
  10   6   1      43     330
  10   6   1     539     420
  10   6   1     165     380
   9  -7  -1    1574     330
   9  -7  -1     610     400
   9  -7  -1    1278     460
   8  -7  -1    1738     430
   8  -7  -1    1699     420
   8  -7  -1    1493     340
   7  -7  -1    1519     400
   7  -7  -1    1934     360
   7  -7  -1    2038     330
   6  -7  -1      62     300
   6  -7  -1      55     310
   6  -7  -1     243     280
   5  -7  -1     330     280
   5  -7  -1     540     120
   5  -7  -1     620     290
   5  -7  -1     640     270
   4  -7  -1     394     280
   4  -7  -1     875     270
   4  -7  -1     283     260
   4  -7  -1    1066     140
  -4   7   1     936     160
   3  -7  -1     353     130
   3  -7  -1     146     260
   3  -7  -1     492     220
   3  -7  -1     165     240
  -3   7   1     363     150
   2  -7  -1     144     230
   2  -7  -1     327     220
   2  -7  -1      14     160
   2  -7  -1     158     140
  -2   7   1     315     270
  -2   7   1     238     160
   1  -7  -1     290     220
   1  -7  -1     189     210
   1  -7  -1     355     150
   1  -7  -1      74     150
  -1   7   1     226     180
  -1   7   1     374     260
  -1  -7  -1     365     230
  -1  -7  -1     235     210
   1   7   1     162     210
   1   7   1       2     240
  -2  -7  -1      14     190
  -2  -7  -1     129     230
   2   7   1      14     250
   2   7   1      14     220
  -3  -7  -1     532     220
   3   7   1     492     280
   3   7   1     363     260
  -4  -7  -1     741     220
   4   7   1    1231     290
   4   7   1    1121     330
  -5  -7  -1     698     210
   5   7   1     718     320
   5   7   1     109     310
   5   7   1     638     150
   6   7   1     439     180
   6   7   1     370     360
   6   7   1      16     320
   7   7   1    2069     270
   7   7   1    2349     450
   7   7   1    2308     420
   8   7   1    1486     440
   8   7   1    1623     440
   9   7   1    1239     480
   9   7   1    1759     480
   9  -8  -1     313     440
   9  -8  -1      58     310
   9  -8  -1     136     410
   8  -8  -1     192     370
   8  -8  -1      66     370
   8  -8  -1      66     280
   7  -8  -1    1228     410
   7  -8  -1     854     340
   7  -8  -1     633     370
   6  -8  -1    1419     360
   6  -8  -1    1274     350
   6  -8  -1    1330     330
   5  -8  -1     224     290
   5  -8  -1     386     310
   5  -8  -1     257     300
   4  -8  -1    1060     170
   4  -8  -1     795     290
   4  -8  -1    1366     340
   4  -8  -1    1338     360
  -4   8   1    1143     190
   3  -8  -1     222     240
   3  -8  -1     612     180
   3  -8  -1    1024     330
   3  -8  -1    1033     320
  -3   8   1     385     200
   2  -8  -1     580     210
   2  -8  -1     497     280
   2  -8  -1     675     180
   2  -8  -1     960     280
  -2   8   1     553     190
  -2   8   1    1184     320
   1  -8  -1    1584     300
   1  -8  -1    1131     280
   1  -8  -1    1156     210
   1  -8  -1     657     180
  -1   8   1     657     200
  -1   8   1     973     290
   0  -8  -1    6738     500
   0  -8  -1    7743     550
   0   8   1    8238     490
   0   8   1    6833     590
  -1  -8  -1    1110     270
  -1  -8  -1    1085     270
   1   8   1     938     250
   1   8   1    1902     340
  -2  -8  -1     121     260
  -2  -8  -1     743     240
   2   8   1     636     310
   2   8   1    1358     280
  -3  -8  -1     686     270
   3   8   1     933     320
   3   8   1     966     360
  -4  -8  -1     923     260
   4   8   1    1450     360
   4   8   1     987     360
  -5  -8  -1     500     230
   5   8   1     102     330
   5   8   1     474     350
   6   8   1    1924     420
   6   8   1    1052     360
   7   8   1     681     430
   7   8   1    1254     440
   8   8   1       3     410
   8   8   1      80     420
   9   8   1       1     430
   9   8   1      56     470
   8  -9  -1     450     420
   8  -9  -1     777     420
   8  -9  -1    1204     390
   7  -9  -1     829     410
   7  -9  -1     266     350
   7  -9  -1     431     350
   6  -9  -1    3417     460
   6  -9  -1    2751     440
   6  -9  -1    2845     460
   5  -9  -1     556     320
   5  -9  -1    1116     330
   5  -9  -1     830     350
   4  -9  -1       1     260
   4  -9  -1     265     330
   4  -9  -1     211     310
  -4   9   1     467     180
   3  -9  -1       5     230
   3  -9  -1       5     290
   3  -9  -1       5     310
   3  -9  -1       5     160
  -3   9   1       5     200
   2  -9  -1     891     350
   2  -9  -1     299     290
   2  -9  -1    1032     240
   2  -9  -1     994     210
  -2   9   1     390     370
  -2   9   1     629     230
   1  -9  -1     106     310
   1  -9  -1     124     180
   1  -9  -1     452     270
  -1   9   1     133     340
  -1   9   1     189     230
  -1  -9  -1     452     300
  -1  -9  -1     133     280
   1   9   1     115     340
   1   9   1     404     260
  -2  -9  -1      65     290
  -2  -9  -1     526     290
   2   9   1     805     380
   2   9   1     281     300
  -3  -9  -1       5     250
   3   9   1       2     310
   3   9   1      87     360
  -4  -9  -1     168     250
   4   9   1       1     370
   4   9   1       1     330
   5   9   1     654     400
   5   9   1       0     360
   6   9   1    2005     460
   6   9   1    2424     470
   7   9   1     893     450
   7   9   1     586     410
   8   9   1     853     510
   8   9   1     899     510
   8 -10  -1     151     420
   8 -10  -1      49     400
   8 -10  -1     217     390
   7 -10  -1     890     390
   7 -10  -1     112     360
   7 -10  -1     570     400
   6 -10  -1     113     400
   6 -10  -1    1718     420
   6 -10  -1     867     380
   5 -10  -1    1795     440
   5 -10  -1     873     350
   5 -10  -1    1229     410
   4 -10  -1    2882     430
   4 -10  -1    2290     350
   4 -10  -1    2758     430
   3 -10  -1     333     280
   3 -10  -1     118     320
   3 -10  -1      93     360
  -3  10   1      93     240
   2 -10  -1    1985     290
   2 -10  -1    3065     440
   2 -10  -1    2051     390
  -2  10   1    2566     310
  -2  10   1    2205     430
   1 -10  -1    3768     320
   1 -10  -1    3163     440
   1 -10  -1    4952     520
  -1  10   1    3970     390
  -1  10   1    3058     500
   0 -10  -1    4280     470
   0 -10  -1    4291     440
   0  10   1    3184     370
   0  10   1    3669     500
  -1 -10  -1    4655     500
  -1 -10  -1    3280     450
   1  10   1    3914     520
   1  10   1    4116     440
  -2 -10  -1    2438     410
  -2 -10  -1    2786     390
   2  10   1    2503     470
   2  10   1    1945     380
  -3 -10  -1     386     310
   3  10   1     586     370
   3  10   1     379     430
  -4 -10  -1    3101     360
   4  10   1    2672     440
   4  10   1    2616     480
   5  10   1    1622     500
   5  10   1    1483     450
   6  10   1     928     460
   6  10   1     338     440
   7  10   1       1     460
   7  10   1     459     490
   8  10   1      50     470
   8  10   1      50     460
   7 -11  -1     295     450
   7 -11  -1       1     400
   7 -11  -1     164     410
   6 -11  -1       0     380
   6 -11  -1       0     410
   6 -11  -1       0     340
   5 -11  -1     192     400
   5 -11  -1     104     330
   5 -11  -1      18     400
   4 -11  -1     473     310
   4 -11  -1     189     400
   4 -11  -1     473     390
   3 -11  -1     247     280
   3 -11  -1      29     360
   3 -11  -1     226     390
   2 -11  -1      10     350
   2 -11  -1     278     370
   2 -11  -1     578     250
  -2  11   1     348     260
   1 -11  -1     273     350
   1 -11  -1     909     400
  -1  11   1      71     270
  -1  11   1       0     420
  -1 -11  -1      53     350
  -1 -11  -1     489     340
   1  11   1     226     330
   1  11   1       0     420
  -2 -11  -1     139     380
  -2 -11  -1     268     340
   2  11   1     158     340
   2  11   1     218     430
  -3 -11  -1     594     330
   3  11   1       1     440
   3  11   1       1     340
   4  11   1     652     480
   4  11   1    1116     440
   5  11   1       0     400
   5  11   1       0     470
   6  11   1      21     500
   6  11   1       0     430
   7  11   1       5     480
   7  11   1       1     530
   6 -12  -1     950     480
   5 -12  -1     687     380
   5 -12  -1    1705     500
   5 -12  -1    1590     500
   4 -12  -1    1474     430
   4 -12  -1    2564     510
   3 -12  -1    4038     570
   3 -12  -1    5150     630
   2 -12  -1    2996     520
   2 -12  -1    1914     460
  -2  12   1    2018     350
   1 -12  -1    3928     550
   1 -12  -1    3165     520
  -1  12   1    3349     460
  -1  12   1    3522     610
   0 -12  -1    7562     650
   0 -12  -1    6780     640
   0  12   1    5632     520
   0  12   1    5388     690
  -1 -12  -1    4024     560
  -1 -12  -1    4140     540
   1  12   1    2482     540
   1  12   1    3473     490
  -2 -12  -1    1973     420
  -2 -12  -1    1522     450
   2  12   1    1533     430
   2  12   1    2607     580
   3  12   1    5556     710
   3  12   1    4285     550
   4  12   1    1935     500
   4  12   1    1595     560
   5  12   1    1595     520
   5  12   1    1509     570
   4 -13  -1       1     440
   4 -13  -1       1     440
   3 -13  -1     540     460
   3 -13  -1     307     460
   2 -13  -1      21     410
   2 -13  -1     148     470
   1 -13  -1     136     440
   1 -13  -1       3     400
  -1  13   1       3     330
  -1  13   1       3     430
  -1 -13  -1     137     400
  -1 -13  -1     371     430
   1  13   1       3     360
   1  13   1     999     580
  -2 -13  -1      91     400
   2  13   1      21     520
   2  13   1      21     410
   3  13   1      36     520
   3  13   1      36     400
   4  13   1      80     540
   4  13   1       1     430
   1 -14  -1     781     500
   1 -14  -1     192     500
  -1  14   1     333     580
   0 -14  -1      46     480
   0 -14  -1       0     450
   0  14   1       0     560
  -1 -14  -1     637     470
  -1 -14  -1     703     480
   1  14   1      77     430
   1  14   1       6     530
   1  14  -2       6     400
   1  14  -2     388     600
  -1 -14   2     798     500
  -1 -14   2     776     470
   0  14  -2       0     550
   0 -14   2       0     450
   0 -14   2     144     450
  -1  14  -2     238     550
   1 -14   2       6     450
   1 -14   2       6     480
   4  13  -2    1005     620
   4  13  -2      11     460
   3  13  -2    1505     500
   3  13  -2     112     560
   2  13  -2    1289     450
   2  13  -2    2127     620
  -2 -13   2    1920     480
   1  13  -2       0     510
   1  13  -2       0     400
  -1 -13   2     747     450
  -1 -13   2     553     440
  -1  13  -2     170     530
   1 -13   2     892     490
   1 -13   2      45     430
   2 -13   2    1590     520
   2 -13   2    2005     500
   3 -13   2     232     460
   3 -13   2     681     460
   4 -13   2     412     460
   4 -13   2     518     470
   5  12  -2       4     500
   5  12  -2     611     480
   4  12  -2     229     540
   4  12  -2     210     430
   3  12  -2     400     520
   3  12  -2     939     440
   2  12  -2    1155     530
   2  12  -2     371     380
  -2 -12   2     875     400
  -2 -12   2     560     410
   1  12  -2     281     470
   1  12  -2      25     320
  -1 -12   2     572     380
  -1 -12   2       8     390
   0  12  -2    1830     370
   0  12  -2    1145     520
   0 -12   2    1571     430
   0 -12   2    1903     440
  -1  12  -2     414     490
  -1  12  -2     265     310
   1 -12   2     223     410
   1 -12   2     440     400
  -2  12  -2      84     480
   2 -12   2       2     370
   2 -12   2     679     430
   3 -12   2     549     420
   3 -12   2     719     430
   4 -12   2       0     390
   4 -12   2     242     440
   5 -12   2     709     460
   5 -12   2     261     440
   5 -12   2     199     350
   6 -12   2     703     460
   7  11  -2      17     480
   7  11  -2      17     510
   6  11  -2      25     430
   6  11  -2      25     490
   5  11  -2     397     490
   5  11  -2     233     430
   4  11  -2     565     420
   4  11  -2     792     500
   3  11  -2     841     450
   3  11  -2       6     360
  -3 -11   2       6     320
   2  11  -2    1229     380
   2  11  -2     667     470
  -2 -11   2    1540     410
  -2 -11   2    1287     390
   1  11  -2     142     320
   1  11  -2     588     430
  -1 -11   2     435     360
  -1 -11   2     516     350
  -1  11  -2     141     390
  -1  11  -2     303     270
   1 -11   2     166     330
   1 -11   2     294     380
  -2  11  -2    1344     490
  -2  11  -2    1383     300
   2 -11   2     907     400
   2 -11   2    1295     400
   2 -11   2    1130     280
   3 -11   2       6     360
   3 -11   2       6     250
   3 -11   2     629     390
   4 -11   2     368     300
   4 -11   2     823     370
   4 -11   2     771     390
   5 -11   2       3     380
   5 -11   2     652     430
   5 -11   2       8     330
   6 -11   2     128     340
   6 -11   2     282     360
   6 -11   2     445     410
   7 -11   2     165     400
   7 -11   2      18     390
   7 -11   2      40     390
   8  10  -2       1     510
   8  10  -2     258     510
   7  10  -2     692     450
   7  10  -2     497     500
   6  10  -2    2495     530
   6  10  -2     788     470
   5  10  -2    1262     390
   5  10  -2    1965     520
   4  10  -2     304     370
   4  10  -2     304     440
  -4 -10   2    1345     330
   3  10  -2    1318     370
   3  10  -2    1618     450
  -3 -10   2    2018     370
   2  10  -2    1621     340
   2  10  -2    1710     450
  -2 -10   2    1293     330
  -2 -10   2    1822     380
   1  10  -2    4372     480
   1  10  -2    4336     580
  -1 -10   2    5403     560
  -1 -10   2    4399     520
   0  10  -2   14606     680
   0  10  -2   13648     800
   0 -10   2   15064     760
   0 -10   2   16497     800
  -1  10  -2    4432     420
  -1  10  -2    4180     560
   1 -10   2    4198     520
   1 -10   2    4585     530
   1 -10   2    4216     380
  -2  10  -2    1682     450
  -2  10  -2    1378     270
   2 -10   2    1570     260
   2 -10   2    1298     360
   2 -10   2    1321     370
  -3  10  -2    1318     240
   3 -10   2    1428     300
   3 -10   2     618     370
   3 -10   2    1488     350
   4 -10   2    1164     390
   4 -10   2     881     310
   4 -10   2     619     350
   5 -10   2    1390     420
   5 -10   2    1601     360
   5 -10   2    1671     420
   6 -10   2    1207     380
   6 -10   2    1137     430
   6 -10   2    1478     430
   7 -10   2     539     400
   7 -10   2     642     380
   7 -10   2     447     420
   8 -10   2       1     410
   8 -10   2     167     370
   8   9  -2       7     430
   8   9  -2      93     470
   7   9  -2     318     420
   7   9  -2     129     410
   6   9  -2    2110     500
   6   9  -2    2598     500
   5   9  -2    2000     450
   5   9  -2    2072     440
   4   9  -2    1070     350
   4   9  -2    1874     420
  -4  -9   2    1357     290
   3   9  -2     751     380
   3   9  -2       0     300
  -3  -9   2     265     280
   2   9  -2       6     330
   2   9  -2     433     290
  -2  -9   2       6     280
  -2  -9   2     456     280
   1   9  -2      92     350
   1   9  -2     288     270
  -1  -9   2     494     290
  -1  -9   2     184     290
  -1   9  -2      46     350
  -1   9  -2     143     220
   1  -9   2     109     170
   1  -9   2       5     280
   1  -9   2       5     290
  -2   9  -2       6     190
  -2   9  -2     130     330
   2  -9   2     105     290
   2  -9   2     661     320
   2  -9   2     437     210
  -3   9  -2      90     190
   3  -9   2       0     320
   3  -9   2       0     220
   3  -9   2     340     320
  -4   9  -2    1526     170
   4  -9   2    1621     310
   4  -9   2    1228     350
   4  -9   2    1737     380
   5  -9   2    1995     370
   5  -9   2    1985     400
   5  -9   2    2356     420
   6  -9   2    2157     450
   6  -9   2    1543     400
   6  -9   2    2635     450
   7  -9   2      44     330
   7  -9   2     772     360
   7  -9   2       3     360
   8  -9   2       8     340
   8  -9   2       7     370
   8  -9   2     481     390
   9   8  -2     533     490
   9   8  -2    1154     490
   8   8  -2      16     400
   8   8  -2      16     400
   7   8  -2      19     350
   7   8  -2       1     390
   6   8  -2    1056     400
   6   8  -2    1176     400
   5   8  -2    2049     430
   5   8  -2    1864     420
  -5  -8   2    1756     280
   4   8  -2    8636     630
   4   8  -2   10283     620
  -4  -8   2    9428     510
   3   8  -2   11389     710
   3   8  -2   11653     790
  -3  -8   2   10518     660
   2   8  -2    8729     530
   2   8  -2    9778     500
  -2  -8   2   10630     500
  -2  -8   2   10117     500
   1   8  -2   19345     950
   1   8  -2   17892    1060
  -1  -8   2   19045    1010
  -1  -8   2   18147     960
   0   8  -2    9090     480
   0   8  -2    9613     410
   0  -8   2    8253     290
   0  -8   2    9244     440
   0  -8   2   10611     490
  -1   8  -2   19547     890
  -1   8  -2   17566    1060
   1  -8   2   18604    1010
   1  -8   2   18912     970
   1  -8   2   18542     900
  -2   8  -2    7949     530
  -2   8  -2    9345     380
   2  -8   2   10328     560
   2  -8   2   10083     510
   2  -8   2    9063     420
  -3   8  -2   10834     530
   3  -8   2   10508     700
   3  -8   2   10173     640
   3  -8   2   11270     730
  -4   8  -2   10129     360
   4  -8   2   10396     630
   4  -8   2    9573     560
   4  -8   2    9958     580
   5  -8   2    2156     370
   5  -8   2    1843     360
   5  -8   2    1999     350
   6  -8   2      65     300
   6  -8   2     259     330
   6  -8   2      29     280
   7  -8   2       1     330
   7  -8   2      49     280
   7  -8   2       1     330
   8  -8   2      17     350
   8  -8   2     406     370
   8  -8   2      17     300
   9  -8   2     476     430
   9  -8   2     919     340
   9  -8   2    1294     450
   9   7  -2       4     410
   9   7  -2     297     440
   8   7  -2     210     370
   8   7  -2     993     430
   7   7  -2    2435     430
   7   7  -2    2229     270
   7   7  -2    2174     440
   6   7  -2      44     320
   6   7  -2       2     330
   6   7  -2       2     160
   5   7  -2      47     130
   5   7  -2       1     320
   5   7  -2      93     290
  -5  -7   2      93     180
   4   7  -2     128     310
   4   7  -2     540     330
  -4  -7   2     717     240
   3   7  -2    3127     330
   3   7  -2    4054     310
  -3  -7   2    3368     240
   2   7  -2    7710     670
   2   7  -2    8072     600
  -2  -7   2    8429     610
  -2  -7   2    7645     580
   1   7  -2    5983     330
   1   7  -2    5947     410
  -1  -7   2    6961     380
  -1  -7   2    6533     360
  -1   7  -2    7135     440
  -1   7  -2    6744     310
   1  -7   2    6218     370
   1  -7   2    6026     280
   1  -7   2    6434     380
  -2   7  -2    8598     650
  -2   7  -2    7789     500
   2  -7   2    7901     610
   2  -7   2    8314     640
   2  -7   2    8217     560
  -3   7  -2    3183     160
   3  -7   2    2316     240
   3  -7   2    3334     290
   3  -7   2    2830     280
   4  -7   2     507     310
   4  -7   2     758     310
   4  -7   2     229     270
   5  -7   2      96     260
   5  -7   2      96     270
   5  -7   2      41     290
   6  -7   2       3     270
   6  -7   2     176     320
   6  -7   2       8     300
   7  -7   2    2337     420
   7  -7   2    2120     400
   7  -7   2    2033     340
   8  -7   2     325     390
   8  -7   2     361     290
   8  -7   2     618     380
   9  -7   2     363     400
   9  -7   2     210     380
   9  -7   2     426     290
  10   6  -2     579     430
  10   6  -2      28     420
  10   6  -2     340     350
   9   6  -2       0     370
   9   6  -2     261     390
   8   6  -2     494     390
   8   6  -2     184     360
   8   6  -2     428     260
   7   6  -2      40     210
   7   6  -2     205     330
   7   6  -2      30     310
   6   6  -2    1268     350
   6   6  -2    1210     350
   6   6  -2    1073     220
  -6  -6   2    1102     180
   5   6  -2    1659     200
   5   6  -2    1282     320
   5   6  -2    1722     360
  -5  -6   2    1542     220
   4   6  -2    1767     340
   4   6  -2    2267     200
   4   6  -2    2416     370
  -4  -6   2    2159     260
   3   6  -2    2542     280
   3   6  -2    2514     210
   3   6  -2    2418     280
  -3  -6   2    2278     210
   2   6  -2    1405     160
   2   6  -2    1864     240
   2   6  -2    1633     210
  -2  -6   2    1226     180
  -2  -6   2    1864     200
   1   6  -2     849     310
   1   6  -2     734     370
   1   6  -2     747     310
  -1  -6   2     823     330
  -1  -6   2     709     340
   0   6  -2   14846     310
   0   6  -2   12243     350
   0   6  -2   14930     340
   0  -6   2   14458     350
  -1   6  -2     945     270
  -1   6  -2     556     350
  -1   6  -2     818     330
   1  -6   2     647     320
   1  -6   2     883     350
   1  -6   2     663     270
   1  -6   2     611     340
  -2   6  -2    1347     120
  -2   6  -2    1347     210
   2  -6   2     415     160
   2  -6   2     415     190
   2  -6   2     415     190
   2  -6   2     415     190
  -3   6  -2    2640     130
   3  -6   2    2434     260
   3  -6   2    1837     230
   3  -6   2    1939     240
   3  -6   2    2503     230
   4  -6   2    2534     360
   4  -6   2    2559     380
   4  -6   2    2484     350
   4  -6   2    3005     380
   5  -6   2    1699     300
   5  -6   2    1510     300
   5  -6   2    1573     330
   5  -6   2     830     330
   6  -6   2     768     310
   6  -6   2     963     280
   6  -6   2     875     260
   6  -6   2     506     310
   7  -6   2      53     270
   7  -6   2     201     330
   7  -6   2      47     240
   8  -6   2     772     380
   8  -6   2    1077     390
   8  -6   2     703     270
   9  -6   2      88     370
   9  -6   2     489     370
   9  -6   2       0     220
  10  -6   2      78     260
  10  -6   2     457     450
  10  -6   2       1     360
  10   5  -2     996     360
  10   5  -2     194     330
  10   5  -2     539     400
  10   5  -2    1005     440
   9   5  -2     850     300
   9   5  -2     544     370
   9   5  -2     667     360
   9   5  -2     708     310
   8   5  -2     941     390
   8   5  -2     958     300
   8   5  -2     515     350
   7   5  -2      48     310
   7   5  -2      15     220
   7   5  -2     122     310
   6   5  -2    5067     520
   6   5  -2    5345     550
   6   5  -2    4824     410
  -6  -5   2    4305     300
   5   5  -2   12780     580
   5   5  -2   11162     570
   5   5  -2   11128     450
  -5  -5   2   10852     410
   4   5  -2   10241     580
   4   5  -2   10741     480
   4   5  -2   10333     540
   4   5  -2   10361     620
  -4  -5   2   10000     500
   3   5  -2    4241     250
   3   5  -2    4276     170
   3   5  -2    4218     320
   3   5  -2    3097     260
  -3  -5   2    3745     230
  -3  -5   2    3709     230
   2   5  -2     309     200
   2   5  -2     127     170
   2   5  -2     385     140
  -2  -5   2     336     140
  -2  -5   2     572     160
  -2  -5   2     591     160
   1   5  -2    5637     340
   1   5  -2    5334     360
   1   5  -2    5848     420
  -1  -5   2    5876     400
  -1  -5   2    5573     360
  -1  -5   2    5426     350
  -1  -5   2    5444     380
  -1   5  -2    5897     410
  -1   5  -2    5787     310
  -1   5  -2    5741     350
   1  -5   2    6054     340
   1  -5   2    4998     380
   1  -5   2    5768     370
   1  -5   2    5346     390
   1  -5   2    6054     400
  -2   5  -2     338     170
  -2   5  -2     432     100
  -2   5  -2     701     210
   2  -5   2     128     180
   2  -5   2     128      90
   2  -5   2     454     190
   2  -5   2     592     170
   2  -5   2     803     170
   2  -5   2     282     180
  -3   5  -2    4340     160
   3  -5   2    3585     270
   3  -5   2    4176     290
   3  -5   2    4106     150
   3  -5   2    3358     260
   3  -5   2    4188     290
   4  -5   2   10552     630
   4  -5   2   10682     590
   4  -5   2   10274     570
   4  -5   2   10145     580
   5  -5   2   11068     500
   5  -5   2   10236     570
   5  -5   2   11996     520
   5  -5   2   10603     510
   6  -5   2    3959     440
   6  -5   2    4717     520
   6  -5   2    5055     470
   6  -5   2    4535     430
   7  -5   2      50     330
   7  -5   2      83     260
   7  -5   2     176     230
   8  -5   2    1382     380
   8  -5   2     932     260
   8  -5   2     897     410
   9  -5   2     426     230
   9  -5   2     867     360
   9  -5   2     508     400
  10  -5   2    1079     390
  10  -5   2     512     420
  10  -5   2     651     240
  10   4  -2     522     330
  10   4  -2     593     370
  10   4  -2     522     330
  10   4  -2     859     380
   9   4  -2     211     340
   9   4  -2     331     310
   9   4  -2     436     360
   9   4  -2     211     310
   8   4  -2    1473     320
   8   4  -2    1574     370
   8   4  -2    1648     330
   8   4  -2    1538     360
   7   4  -2     242     250
   7   4  -2       1     290
   7   4  -2       1     290
   6   4  -2    2316     340
   6   4  -2    3164     310
   6   4  -2    2374     360
   5   4  -2     118     160
   5   4  -2     196     230
   5   4  -2     967     230
  -5  -4   2     455     100
  -5  -4   2     346      80
   4   4  -2    4161     240
   4   4  -2    4270     260
   4   4  -2    3763     190
  -4  -4   2    4957     180
  -4  -4   2    4836     170
   3   4  -2     497     230
   3   4  -2     300     260
   3   4  -2     282     270
   3   4  -2     354     200
  -3  -4   2     340     200
  -3  -4   2     460     210
  -3  -4   2     662     290
   2   4  -2   15994     920
   2   4  -2   14571     850
   2   4  -2   15631     820
  -2  -4   2   15245     890
  -2  -4   2   15309     860
   1   4  -2    2661     190
   1   4  -2    3461     160
   0   4  -2   32720    1170
   0   4  -2   32339    1280
   0   4  -2   31948    1170
   0  -4   2   32996    1250
   0  -4   2   31929    1250
   0  -4   2   32996    1180
   0  -4   2   31359    1190
  -1   4  -2    2931     130
  -1   4  -2    3079     170
  -1   4  -2    3255     220
   1  -4   2    2750     120
   1  -4   2    2612     170
   1  -4   2    3064     200
   1  -4   2    2627     190
   1  -4   2    3314     200
  -2   4  -2   15490     800
  -2   4  -2   17694     890
   2  -4   2   17262     940
   2  -4   2   16265     920
   2  -4   2   15756     920
   2  -4   2   16337     800
   2  -4   2   15731     880
   3  -4   2    1191     320
   3  -4   2     612     290
   3  -4   2     513     250
   3  -4   2     569     270
   4  -4   2    5033     280
   4  -4   2    5226     250
   4  -4   2    3890     230
   4  -4   2    4973     230
   5  -4   2     193     230
   5  -4   2     365     180
   5  -4   2     583     220
   5  -4   2     115     160
   6  -4   2    2451     270
   6  -4   2    2548     280
   6  -4   2    2881     360
   6  -4   2    2412     380
   6  -4   2    2783     200
   6  -4   2    2558     190
   7  -4   2     592     320
   7  -4   2     938     310
   7  -4   2     621     200
   8  -4   2    1277     360
   8  -4   2    1058     180
   8  -4   2    1304     240
   8  -4   2     824     390
   9  -4   2     529     350
   9  -4   2     204     390
   9  -4   2     131     200
  10  -4   2      63     370
  10  -4   2     433     350
  10  -4   2     248     190
  11   3  -2     177     380
  11   3  -2     191     400
  11   3  -2      36     340
  11   3  -2     306     380
  10   3  -2     355     330
  10   3  -2     355     320
  10   3  -2     768     360
  10   3  -2     127     360
   9   3  -2    4902     480
   9   3  -2    4698     500
   9   3  -2    5470     470
   9   3  -2    4665     460
   8   3  -2    3175     440
   8   3  -2    3156     390
   8   3  -2    3083     410
   8   3  -2    3304     430
   7   3  -2    3536     380
   7   3  -2    4833     440
   7   3  -2    3024     370
   7   3  -2    4076     380
   6   3  -2    2501     360
   6   3  -2    2389     300
   6   3  -2    2351     330
   5   3  -2    3722     260
   5   3  -2    4202     320
   5   3  -2    3225     270
   4   3  -2    1401     260
   4   3  -2    1237     210
   4   3  -2    1148     240
  -4  -3   2    1310     130
  -4  -3   2    1156     140
   3   3  -2     594     120
   3   3  -2     273     170
   3   3  -2      15     160
  -3  -3   2     325      90
  -3  -3   2     273     100
  -3  -3   2      88     110
   2   3  -2    3178     220
   2   3  -2    3368     170
   2   3  -2    3326     250
   2   3  -2    3601     240
  -2  -3   2    3390     230
  -2  -3   2    4244     210
  -2  -3   2    3548     210
   1   3  -2    4859     320
   1   3  -2    5545     290
   1   3  -2    5678     360
   1   3  -2    4144     310
  -1  -3   2    5404     300
  -1  -3   2    5722     340
  -1  -3   2    4405     300
  -1  -3   2    4850     310
  -1   3  -2    4704     340
  -1   3  -2    5126     260
  -1   3  -2    5390     310
  -1   3  -2    5487     360
   1  -3   2    4994     340
   1  -3   2    4512     330
   1  -3   2    5806     330
   1  -3   2    5673     360
   2  -3   2    3291     230
   2  -3   2    4157     250
   2  -3   2    3131     220
   2  -3   2    3131     240
  -3   3  -2     159      60
   3  -3   2     488     160
   3  -3   2     342     150
   3  -3   2      66     120
   3  -3   2     145     130
  -4   3  -2    1127     240
   4  -3   2    1371     210
   4  -3   2    1306     140
   4  -3   2    1744     250
   4  -3   2    1652     220
   5  -3   2    3375     180
   5  -3   2    3929     230
   5  -3   2    3941     190
   5  -3   2    3753     290
   5  -3   2    4360     250
   6  -3   2    2483     200
   6  -3   2    2549     330
   6  -3   2    1957     230
   6  -3   2    2351     250
   6  -3   2    2417     370
   7  -3   2    3680     290
   7  -3   2    3514     440
   7  -3   2    4136     290
   7  -3   2    4550     420
   7  -3   2    4167     270
   8  -3   2    3175     300
   8  -3   2    3535     500
   8  -3   2    3285     290
   8  -3   2    3267     450
   9  -3   2    4848     480
   9  -3   2    4525     550
   9  -3   2    4859     320
  10  -3   2     252     380
  10  -3   2     901     440
  10  -3   2     144     160
  11  -3   2      21     420
  11  -3   2      36     380
  11   2  -2       2     320
  11   2  -2     322     380
  11   2  -2       2     320
  11   2  -2     463     370
  10   2  -2    1177     390
  10   2  -2     735     350
  10   2  -2     905     390
  10   2  -2     507     350
   9   2  -2    1621     360
   9   2  -2    2327     380
   9   2  -2    1427     340
   9   2  -2    1869     330
   8   2  -2     531     260
   8   2  -2     234     290
   8   2  -2     221     270
   8   2  -2     344     280
   7   2  -2       0     260
   7   2  -2     700     270
   7   2  -2     639     250
   7   2  -2     282     270
   6   2  -2    2167     320
   6   2  -2    2158     280
   6   2  -2    2398     320
   6   2  -2    1918     290
   5   2  -2    1414     220
   5   2  -2    1160     230
   5   2  -2    1326     250
   4   2  -2   10205     660
   4   2  -2   10214     630
   3   2  -2     894     150
   3   2  -2    1016     180
  -3  -2   2    1524      80
  -3  -2   2    1669      80
   2   2  -2    6842      80
   2   2  -2    5146     140
   2   2  -2    6842      90
  -2  -2   2    5341     130
  -2  -2   2    6842      80
  -2  -2   2    4924      80
   1   2  -2    2813     610
   1   2  -2    4055     690
   1   2  -2    2722     640
  -1  -2   2    3782     670
  -1  -2   2    3266     610
  -1  -2   2    2889     610
  -1  -2   2    2647     640
   0   2  -2  181698    3650
   0   2  -2  177107    3680
   0   2  -2  175127    3870
   0   2  -2  183205    3910
   0  -2   2  181624    3650
  -1   2  -2    3069     610
  -1   2  -2    2482     640
  -1   2  -2    2842     570
  -1   2  -2    3313     660
   1  -2   2    3427     660
   1  -2   2    2617     650
   1  -2   2    2814     620
  -2   2  -2    6814      20
  -2   2  -2    6814     110
   2  -2   2    6814     130
  -3   2  -2    4055      70
   3  -2   2    1345     160
   3  -2   2    1937     130
   3  -2   2    1777     120
  -4   2  -2   11425     630
   4  -2   2    9364     580
   4  -2   2    9777     530
   4  -2   2   10589     610
   4  -2   2    9655     580
   5  -2   2    1827     260
   5  -2   2    1700     190
   5  -2   2    1476     160
   5  -2   2    1505     170
   6  -2   2    3536     350
   7  -2   2     304     180
   7  -2   2     416     150
   7  -2   2       0     300
   7  -2   2     222     140
   7  -2   2    1016     290
   8  -2   2     831     150
   8  -2   2    1151     310
   8  -2   2     352     190
   8  -2   2       9     340
   8  -2   2     446     140
   9  -2   2    1780     410
   9  -2   2    1530     250
   9  -2   2    1599     360
   9  -2   2    1667     160
  10  -2   2    1198     430
  10  -2   2     982     390
  11  -2   2       2     350
  11  -2   2     132     390
  11   1  -2    1357     430
  11   1  -2    1659     430
  11   1  -2    1754     460
  11   1  -2    1564     380
  10   1  -2     797     360
  10   1  -2    1280     350
  10   1  -2     980     390
  10   1  -2    1006     370
   9   1  -2    2764     370
   9   1  -2    2976     460
   9   1  -2    2802     420
   9   1  -2    2744     400
   8   1  -2    1670     330
   8   1  -2     622     320
   8   1  -2    1384     290
   8   1  -2    1435     310
   7   1  -2    3250     370
   7   1  -2    3682     420
   7   1  -2    4191     380
   7   1  -2    5013     480
   6   1  -2     553     210
   6   1  -2       1     240
   5   1  -2    1665     200
   5   1  -2     688     220
   4   1  -2     318     150
   4   1  -2     827     140
   3   1  -2    2549     140
   2   1  -2   18413     990
   2   1  -2   17051    1010
   2   1  -2   16709     940
  -2  -1   2   17919     940
   1   1  -2    8302     220
   1   1  -2    8536     190
   1   1  -2    7873     180
  -1  -1   2    8247     180
  -1  -1   2    8604     220
  -1  -1   2    8714     190
  -1   1  -2    7919     200
   1  -1   2    8071     200
   1  -1   2    8264     200
   1  -1   2    8947     210
  -2   1  -2   16998     980
  -2   1  -2   18596     960
   2  -1   2   18352     920
   2  -1   2   18242     970
   2  -1   2   17913     990
  -3   1  -2    3278     120
  -3   1  -2    4176     110
   3  -1   2    3177     140
   3  -1   2    2798     100
   3  -1   2    3427     100
   4  -1   2     315     110
   4  -1   2     315      90
   4  -1   2    1267     150
   4  -1   2     315     100
   5  -1   2     695     110
   5  -1   2     470     120
   5  -1   2     670     150
   5  -1   2     910     180
   6  -1   2       1     160
   6  -1   2       1     110
   6  -1   2     120     110
   6  -1   2     423     210
   7  -1   2    4009     330
   7  -1   2    5236     460
   7  -1   2    4103     250
   7  -1   2    3952     250
   7  -1   2    4573     490
   8  -1   2    1546     340
   8  -1   2     663     340
   8  -1   2     694     230
   8  -1   2    1106     110
   9  -1   2    3069     340
   9  -1   2    3040     490
   9  -1   2    3040     430
  10  -1   2     507     400
  10  -1   2     728     290
  10  -1   2    1497     400
  11  -1   2    1660     440
  11  -1   2    1622     490
  11  -1   2    2232     460
  11   0  -2     536     350
  11   0  -2     548     390
  11   0  -2     611     380
  10   0  -2     164     330
  10   0  -2      27     310
  10   0  -2      94     290
  10   0  -2     569     380
   9   0  -2       3     290
   9   0  -2       3     260
   9   0  -2       3     240
   8   0  -2    2097     340
   8   0  -2    1963     380
   8   0  -2    1579     290
   7   0  -2    1426     310
   7   0  -2    1709     280
   7   0  -2    1360     340
   6   0  -2    7898     520
   6   0  -2    9792     460
   5   0  -2      78     170
   5   0  -2     277     200
   5   0  -2      47      60
   5   0  -2      50      60
   4   0  -2   10709     150
   4   0  -2    9828     240
   4   0  -2    9570     270
   4   0  -2   11026     150
   3   0  -2   50994    2880
   3   0  -2   51954    2780
   3   0  -2   55349    2990
  -3   0   2   50005    2880
   2   0  -2   85606    2380
   2   0  -2   83268    2480
   2   0  -2   88863    2560
  -2   0   2   85648    2480
  -2   0   2   86674    2380
   1   0  -2   40259      40
   1   0  -2   42360      60
   1   0  -2   40259      50
  -1   0   2   40168      70
  -1   0   2   40079      50
  -1   0   2   39729      50
   0   0  -2  152750      20
   0   0  -2  152750      10
   0   0   2  152750      10
   0   0   2  152750      10
  -1   0  -2   39756      50
  -1   0  -2   40379      50
   1   0   2   40017      50
   1   0   2   39502      50
  -2   0  -2   86548    2550
   2   0   2   87162    2550
   2   0   2   91232    2460
  -3   0  -2   53391    2940
   3   0   2   52863    2840
   3   0   2   53912    2840
   3   0   2   52795    2940
   4   0   2   10439     160
   4   0   2   11816     290
   4   0   2   10563     250
   4   0   2    9842     160
   6   0   2    9714     480
   6   0   2    8314     430
   7   0   2    2092     280
   7   0   2    1426     350
   7   0   2    1634     320
   8   0   2    1876     370
   8   0   2    1669     280
   8   0   2    1720     350
   9   0   2     159     320
   9   0   2     329     300
   9   0   2      66     230
  10   0   2       0     320
  10   0   2     587     370
  10   0   2     384     280
  10   0   2      26     310
  11   0   2      87     360
  11   0   2     333     370
  11   0   2     360     400
  11  -1  -2    1453     430
  11  -1  -2    1879     490
  10  -1  -2    1249     300
  10  -1  -2    1436     450
  10  -1  -2     792     370
   9  -1  -2    2465     390
   9  -1  -2    3044     470
   9  -1  -2    2919     350
   8  -1  -2    1387     260
   8  -1  -2     935     350
   8  -1  -2     997     310
   7  -1  -2    4013     460
   7  -1  -2    4570     240
   7  -1  -2    4259     240
   7  -1  -2    4826     440
   6  -1  -2      20     220
   6  -1  -2     286     100
   6  -1  -2     342     210
   6  -1  -2     304     100
   5  -1  -2    1106     110
   5  -1  -2    1131     110
   5  -1  -2     825     240
   5  -1  -2     936     190
   4  -1  -2     828     140
   4  -1  -2     319      80
   4  -1  -2    1022      90
   4  -1  -2    1214     180
  -4   1   2     620     120
   3  -1  -2    3336     160
   3  -1  -2    3209     140
   3  -1  -2    3386     100
  -3   1   2    3745     130
  -3   1   2    3411      90
   2  -1  -2   17228     960
   2  -1  -2   17509     980
   2  -1  -2   18795    1040
  -2   1   2   18480     960
  -2   1   2   18166     990
   1  -1  -2    8766     210
   1  -1  -2    8246     200
   1  -1  -2    8561     200
   1  -1  -2    8094     190
  -1   1   2    8411     200
  -1   1   2    8383     190
  -1   1   2    8397     190
  -1  -1  -2    8721     200
  -1  -1  -2    8707     200
  -1  -1  -2    8145     190
   1   1   2    7506     200
   1   1   2    8256     190
   1   1   2    8626     200
  -2  -1  -2   18622     980
  -2  -1  -2   18512     970
   2   1   2   18732    1020
   2   1   2   17704     980
   2   1   2   17955     980
  -3  -1  -2    3676      60
   3   1   2    3676      60
   3   1   2    3582     140
   3   1   2    3340     150
   4   1   2     580     150
   4   1   2    1189     160
   5   1   2    1299     200
   5   1   2     299     190
   5   1   2     683     190
   6   1   2     511     230
   6   1   2     714     220
   6   1   2       1     210
   7   1   2    4651     430
   7   1   2    4490     430
   7   1   2    5105     410
   8   1   2     993     270
   8   1   2    1137     310
   8   1   2     973     340
   8   1   2    1147     310
   9   1   2    2554     430
   9   1   2    2476     350
   9   1   2    2428     400
   9   1   2    2815     410
  10   1   2    1292     390
  10   1   2    1008     390
  10   1   2     350     350
  10   1   2     634     320
  11   1   2    1614     430
  11   1   2    2033     390
  11   1   2    2090     500
  11   1   2    1585     440
  11  -2  -2       2     340
  11  -2  -2     505     410
  10  -2  -2     593     380
  10  -2  -2    1278     460
   9  -2  -2    2077     410
   9  -2  -2    1797     160
   9  -2  -2    1707     280
   9  -2  -2    1605     350
   8  -2  -2     244     130
   8  -2  -2     423     140
   8  -2  -2     412     330
   8  -2  -2     181     200
   8  -2  -2     219     260
   7  -2  -2     315     260
   7  -2  -2     447     140
   7  -2  -2     559     150
   7  -2  -2       0     300
   6  -2  -2    2306     210
   6  -2  -2    2020     300
   6  -2  -2    2084     200
   6  -2  -2    2213     360
   5  -2  -2    1665     180
   5  -2  -2    1538     180
   5  -2  -2    1753     300
   5  -2  -2    1489     250
   4  -2  -2    8780     570
   4  -2  -2   10187     580
   4  -2  -2   10138     680
   4  -2  -2   10473     610
  -4   2   2   10898     610
   3  -2  -2    1335     110
   3  -2  -2    1047     170
   3  -2  -2    1226     190
   2  -2  -2    6846     110
   2  -2  -2    4646     140
   2  -2  -2    6846     130
   2  -2  -2    4445     100
  -2   2   2    5034     120
  -2   2   2    5149     120
  -2   2   2    6846      90
   1  -2  -2    2613     650
   1  -2  -2    3081     620
   1  -2  -2    2890     600
   1  -2  -2    2919     650
  -1   2   2    3176     650
  -1   2   2    3238     630
  -1   2   2    3230     600
   0  -2  -2  176451    3620
   0  -2  -2  178958    3600
   0  -2  -2  177766    3820
   0  -2  -2  184705    3840
   0  -2  -2  173880    3800
   0   2   2  177582    3820
   0   2   2  174004    3620
   0   2   2  172784    3800
  -1  -2  -2    2597     630
  -1  -2  -2    3358     650
   1   2   2    2706     630
   1   2   2    3358     620
   1   2   2    2718     640
   1   2   2    3287     660
  -2  -2  -2    5970      80
  -2  -2  -2    4581     120
  -2  -2  -2    6814     120
   2   2   2    5638      80
   2   2   2    5065     120
   2   2   2    6319     140
  -3  -2  -2     837     160
  -3  -2  -2    1408      80
   3   2   2    1381      90
   3   2   2    1719     150
   3   2   2    1082     160
  -4  -2  -2   12955     650
   4   2   2   13621     660
   4   2   2   13680     750
   4   2   2   14727     780
   5   2   2    1337     240
   5   2   2    1795     240
   6   2   2    2629     320
   6   2   2    2066     290
   7   2   2     547     290
   7   2   2    1105     270
   7   2   2     791     270
   7   2   2     973     290
   8   2   2     798     290
   8   2   2     708     270
   8   2   2     376     270
   8   2   2     411     300
   9   2   2    1758     340
   9   2   2    1826     360
   9   2   2    1815     350
   9   2   2    2095     330
  10   2   2     669     350
  10   2   2     274     350
  10   2   2     559     360
  10   2   2    1118     390
  11   2   2     461     350
  11   2   2       2     360
  11   2   2       2     360
  11   2   2     610     370
  11  -3  -2      37     400
  11  -3  -2       1     360
  10  -3  -2     340     410
  10  -3  -2     348     330
   9  -3  -2    4754     320
   9  -3  -2    4775     540
   9  -3  -2    4786     470
   9  -3  -2    5440     360
   8  -3  -2    3115     290
   8  -3  -2    3383     300
   8  -3  -2    3088     420
   8  -3  -2    3429     490
   7  -3  -2    3845     280
   7  -3  -2    3710     450
   7  -3  -2    3335     350
   7  -3  -2    4395     320
   7  -3  -2    4146     300
   6  -3  -2    2081     360
   6  -3  -2    1950     300
   6  -3  -2    2729     250
   6  -3  -2    2616     250
   6  -3  -2    2625     240
   5  -3  -2    4724     260
   5  -3  -2    3852     220
   5  -3  -2    3922     240
   5  -3  -2    3664     310
   5  -3  -2    4016     290
   4  -3  -2    1582     210
   4  -3  -2    1278     170
   4  -3  -2    1132     210
   4  -3  -2    1278     240
   4  -3  -2    1335     270
  -4   3   2    1409     240
   3  -3  -2     245     140
   3  -3  -2     191      90
   3  -3  -2     322     150
   3  -3  -2     103     160
  -3   3   2     205     140
  -3   3   2     205     120
   2  -3  -2    3806     180
   2  -3  -2    3310     250
   2  -3  -2    3532     230
   2  -3  -2    3595     240
  -2   3   2    3437     190
   1  -3  -2    5127     340
   1  -3  -2    4794     340
   1  -3  -2    5109     280
   1  -3  -2    5567     320
  -1   3   2    5444     310
  -1   3   2    4689     290
  -1   3   2    5241     350
  -1   3   2    5673     340
  -1  -3  -2    5134     330
  -1  -3  -2    5434     330
  -1  -3  -2    5610     340
  -1  -3  -2    5169     320
   1   3   2    5690     310
   1   3   2    4783     320
   1   3   2    4985     330
   1   3   2    6044     360
  -2  -3  -2    3295     240
  -2  -3  -2    3242     200
   2   3   2    3146     220
   2   3   2    3189     220
   2   3   2    3348     200
   2   3   2    3114     220
  -3  -3  -2     159     120
  -3  -3  -2     304      90
   3   3   2     391     140
   3   3   2     187     160
   3   3   2     253     100
  -4  -3  -2    1573     240
  -4  -3  -2    1293     160
  -4  -3  -2    1408     150
   4   3   2    1765     250
   4   3   2    1432     170
   4   3   2    1731     270
  -5  -3  -2    3731     140
  -5  -3  -2    3566     130
   5   3   2    3661     290
   5   3   2    3884     300
   6   3   2    2025     310
   6   3   2    2513     320
   7   3   2    3867     390
   7   3   2    4198     410
   7   3   2    5015     430
   8   3   2    2925     420
   8   3   2    3405     420
   8   3   2    3192     410
   8   3   2    3128     430
   9   3   2    4970     490
   9   3   2    5699     480
   9   3   2    4571     480
   9   3   2    4916     480
  10   3   2      83     350
  10   3   2     273     340
  10   3   2     681     360
  10   3   2     150     330
  11   3   2      36     360
  11   3   2     117     350
  11   3   2     163     350
  11   3   2      36     370
  10  -4  -2    1166     370
  10  -4  -2     253     380
  10  -4  -2     464     200
   9  -4  -2     104     380
   9  -4  -2      98     330
   9  -4  -2     199     210
   8  -4  -2    1116     340
   8  -4  -2    1372     250
   8  -4  -2    1648     410
   8  -4  -2    1666     230
   7  -4  -2      69     190
   7  -4  -2       1     170
   7  -4  -2     150     300
   7  -4  -2     449     180
   7  -4  -2       1     250
   6  -4  -2    2668     280
   6  -4  -2    2590     230
   6  -4  -2    2473     270
   6  -4  -2    2658     320
   6  -4  -2    2853     400
   5  -4  -2     661     130
   5  -4  -2     661     170
   5  -4  -2     393     240
   5  -4  -2     118     160
   5  -4  -2    1089     220
   4  -4  -2    5011     260
   4  -4  -2    4966     170
   4  -4  -2    4771     240
   4  -4  -2    3529     260
   4  -4  -2    6288     260
   3  -4  -2     553     270
   3  -4  -2     605     290
   3  -4  -2     370     250
   3  -4  -2     663     300
   3  -4  -2     440     190
   3  -4  -2     566     270
  -3   4   2     344     200
  -3   4   2     527     250
  -3   4   2     279     230
   2  -4  -2   16739     940
   2  -4  -2   16351     870
   2  -4  -2   16044     900
   2  -4  -2   15278     810
   2  -4  -2   15616     910
  -2   4   2   15536     810
   1  -4  -2    2868     150
   1  -4  -2    2486     170
   1  -4  -2    2423     170
   1  -4  -2    2686     140
  -1   4   2    2053     180
  -1   4   2    2732     150
  -1   4   2    2686     170
  -1   4   2    2328     140
   0  -4  -2   32039    1190
   0  -4  -2   32429    1160
   0  -4  -2   31659    1240
   0  -4  -2   30897    1170
   0   4   2   32067    1190
   0   4   2   32191    1170
   0   4   2   32115    1240
   0   4   2   32134    1260
   0   4   2   32105    1160
  -1  -4  -2    2660     170
  -1  -4  -2    3140     200
  -1  -4  -2    2220     160
  -1  -4  -2    2888     160
   1   4   2    2977     180
   1   4   2    3096     110
   1   4   2    3446     190
   1   4   2    2721     170
   1   4   2    2812     200
  -2  -4  -2   14866     880
  -2  -4  -2   16462     880
   2   4   2   16204     890
   2   4   2   14866     880
   2   4   2   15889     930
   2   4   2   18687     880
  -3  -4  -2     361     200
  -3  -4  -2     380     200
  -3  -4  -2     483     260
   3   4   2     426     220
   3   4   2     446     280
   3   4   2     346     260
  -4  -4  -2    4592     180
  -4  -4  -2    5135     180
  -4  -4  -2    4851     250
   4   4   2    4896     180
   4   4   2    3936     250
   4   4   2    4971     280
  -5  -4  -2     263      90
  -5  -4  -2     566     100
   5   4   2    1140     240
   5   4   2     388     200
   6   4   2    2743     340
   6   4   2    2977     360
   7   4   2       1     260
   7   4   2     477     300
   7   4   2     186     250
   8   4   2    1273     330
   8   4   2    1201     340
   8   4   2    1264     350
   9   4   2     262     340
   9   4   2     210     340
   9   4   2     167     310
   9   4   2     336     340
  10   4   2      12     310
  10   4   2     445     330
  10   4   2      12     340
  10   4   2     195     330
  10  -5  -2     640     430
  10  -5  -2     709     240
  10  -5  -2     998     400
   9  -5  -2     566     350
   9  -5  -2     658     240
   9  -5  -2     340     370
   8  -5  -2     417     340
   8  -5  -2     948     360
   8  -5  -2     505     250
   7  -5  -2      44     280
   7  -5  -2     253     320
   7  -5  -2       1     220
   6  -5  -2    3824     430
   6  -5  -2    4519     310
   6  -5  -2    4029     420
   6  -5  -2    4338     510
   6  -5  -2    5012     500
   5  -5  -2   10931     510
   5  -5  -2   11594     370
   5  -5  -2   11418     510
   5  -5  -2   10400     570
   5  -5  -2   10444     530
   4  -5  -2    9633     600
   4  -5  -2   10400     570
   4  -5  -2   10141     440
   4  -5  -2    9771     580
   4  -5  -2   10150     570
   3  -5  -2    3879     280
   3  -5  -2    4139     290
   3  -5  -2    4009     200
   3  -5  -2    3986     280
   3  -5  -2    3891     280
  -3   5   2    4210     210
   2  -5  -2     919     200
   2  -5  -2     312     180
   2  -5  -2     594     150
   2  -5  -2     886     180
   2  -5  -2     788     110
   2  -5  -2     129     170
  -2   5   2     339     120
  -2   5   2     129     160
  -2   5   2     129      30
   1  -5  -2    5197     390
   1  -5  -2    5913     340
   1  -5  -2    5904     390
   1  -5  -2    5426     320
  -1   5   2    4931     320
  -1   5   2    5848     390
  -1   5   2    5867     430
  -1   5   2    5977     370
  -1  -5  -2    5868     380
  -1  -5  -2    5923     360
  -1  -5  -2    5143     370
  -1  -5  -2    6024     380
   1   5   2    5868     380
   1   5   2    5308     370
   1   5   2    5849     270
   1   5   2    6117     420
   1   5   2    5473     340
  -2  -5  -2     668     140
  -2  -5  -2     365     150
  -2  -5  -2     129     170
  -2  -5  -2     389     160
   2   5   2    1014     200
   2   5   2     871     160
   2   5   2     365     150
   2   5   2     919     180
  -3  -5  -2    4107     230
  -3  -5  -2    3765     230
  -3  -5  -2    4599     300
   3   5   2    4576     310
   3   5   2    4025     240
   3   5   2    5178     300
   3   5   2    4284     310
  -4  -5  -2   10446     520
   4   5   2   10289     610
   4   5   2   11179     610
  -5  -5  -2   10814     400
   5   5   2   11157     560
   5   5   2   11544     560
  -6  -5  -2    4245     290
   6   5   2    4894     500
   6   5   2    4271     420
   6   5   2    4747     500
   7   5   2      88     300
   7   5   2     141     240
   7   5   2     114     310
   8   5   2    1291     380
   8   5   2     777     310
   8   5   2    1170     370
   9   5   2     835     330
   9   5   2     538     360
   9   5   2    1029     370
  10   5   2     767     410
  10   5   2     896     410
  10   5   2     559     360
  10   5   2     687     370
  10  -6  -2      12     380
  10  -6  -2     256     260
  10  -6  -2     219     400
   9  -6  -2     304     390
   9  -6  -2     365     260
   9  -6  -2      56     360
   8  -6  -2      21     330
   8  -6  -2     270     350
   8  -6  -2     506     270
   7  -6  -2      58     300
   7  -6  -2      29     240
   7  -6  -2     108     330
   6  -6  -2    1113     290
   6  -6  -2     743     270
   6  -6  -2    1221     340
   6  -6  -2    1201     150
   6  -6  -2    1573     340
   5  -6  -2    1731     300
   5  -6  -2    1822     320
   5  -6  -2    1363     160
   5  -6  -2    1150     280
   5  -6  -2    1704     340
   4  -6  -2    2247     220
   4  -6  -2    2890     360
   4  -6  -2    2546     350
   4  -6  -2    2504     350
   4  -6  -2    2321     350
  -4   6   2    2131     230
   3  -6  -2    1805     240
   3  -6  -2    2814     270
   3  -6  -2    2418     250
   3  -6  -2    2611     160
   3  -6  -2    2474     240
  -3   6   2    2349     170
   2  -6  -2     410     180
   2  -6  -2    1103     160
   2  -6  -2    1077     200
   2  -6  -2     744     130
   2  -6  -2     704     190
  -2   6   2     610     140
   1  -6  -2     716     330
   1  -6  -2     779     280
   1  -6  -2     779     280
   1  -6  -2     856     360
   1  -6  -2     822     350
  -1   6   2     792     350
  -1   6   2     419     340
  -1   6   2     856     290
   0  -6  -2   13548     300
   0  -6  -2   13927     370
   0  -6  -2   12900     330
   0   6   2   13059     330
   0   6   2   13478     350
   0   6   2   14505     390
   0   6   2   13565     350
  -1  -6  -2     955     330
  -1  -6  -2     721     330
  -1  -6  -2     627     320
   1   6   2     696     360
   1   6   2     692     320
   1   6   2     946     350
   1   6   2     680     300
  -2  -6  -2    1721     190
   2   6   2    1798     190
   2   6   2    2772     250
  -3  -6  -2    2265     200
   3   6   2    2760     220
   3   6   2    3001     280
   3   6   2    2556     280
  -4  -6  -2    2657     300
   4   6   2    2951     380
   4   6   2    2985     390
  -5  -6  -2    1937     240
   5   6   2    2082     360
   5   6   2    1460     220
   5   6   2    1774     350
  -6  -6  -2     839     180
   6   6   2    1054     230
   6   6   2    1270     350
   6   6   2     820     320
   7   6   2     123     220
   7   6   2      17     330
   7   6   2      21     300
   8   6   2       1     360
   8   6   2     195     260
   8   6   2      93     340
   9   6   2      46     280
   9   6   2     223     380
   9   6   2       0     370
  10   6   2       1     340
  10   6   2       1     400
  10   6   2       1     400
   9  -7  -2     368     400
   9  -7  -2     207     280
   9  -7  -2     113     380
   8  -7  -2     351     300
   8  -7  -2     663     380
   8  -7  -2     156     350
   7  -7  -2    2850     360
   7  -7  -2    1961     400
   7  -7  -2    2321     380
   6  -7  -2      47     290
   6  -7  -2      37     300
   6  -7  -2      19     260
   5  -7  -2      51     130
   5  -7  -2      94     280
   5  -7  -2      94     270
   5  -7  -2      83     280
   4  -7  -2     748     330
   4  -7  -2     321     260
   4  -7  -2     575     280
   4  -7  -2     536     160
  -4   7   2     776     190
   3  -7  -2    3197     260
   3  -7  -2    3540     260
   3  -7  -2    3106     170
   3  -7  -2    3377     310
  -3   7   2    2813     190
   2  -7  -2    8119     500
   2  -7  -2    8712     600
   2  -7  -2    7788     560
   2  -7  -2    7651     630
  -2   7   2    8087     520
   1  -7  -2    5609     350
   1  -7  -2    7468     410
   1  -7  -2    6079     300
   1  -7  -2    6235     300
  -1   7   2    6962     330
  -1   7   2    6247     410
  -1  -7  -2    6091     360
  -1  -7  -2    5862     350
   1   7   2    6749     350
   1   7   2    5850     370
   1   7   2    5850     350
  -2  -7  -2    9021     620
  -2  -7  -2    7779     610
   2   7   2    7851     620
   2   7   2    8670     680
  -3  -7  -2    2822     230
   3   7   2    3114     310
   3   7   2    3429     300
  -4  -7  -2     552     240
   4   7   2     664     290
   4   7   2     445     130
   4   7   2     354     320
  -5  -7  -2       5     190
   5   7   2      27     310
   5   7   2      54     310
   5   7   2       1     150
   6   7   2      47     280
   6   7   2      47     320
   6   7   2       1     180
   7   7   2    2774     290
   7   7   2    2244     430
   7   7   2    2124     400
   8   7   2     871     400
   8   7   2      41     380
   9   7   2     105     420
   9   7   2     279     390
   9  -8  -2     598     420
   9  -8  -2     319     330
   9  -8  -2     502     420
   8  -8  -2      16     350
   8  -8  -2     439     360
   8  -8  -2      16     300
   7  -8  -2      46     310
   7  -8  -2      77     350
   7  -8  -2     124     340
   6  -8  -2     355     310
   6  -8  -2      30     300
   6  -8  -2      30     300
   5  -8  -2    1941     350
   5  -8  -2    1482     350
   5  -8  -2    1844     350
   4  -8  -2   10074     610
   4  -8  -2    9337     380
   4  -8  -2    9209     610
   4  -8  -2    9080     560
  -4   8   2    9251     410
   3  -8  -2   10085     670
   3  -8  -2   11190     730
   3  -8  -2   11426     540
   3  -8  -2   10184     650
  -3   8   2   11072     570
   2  -8  -2   10253     400
   2  -8  -2    9633     530
   2  -8  -2   10684     550
   2  -8  -2   10101     440
  -2   8   2    9044     410
   1  -8  -2   18372     900
   1  -8  -2   18038     960
   1  -8  -2   17791    1010
   1  -8  -2   18416     880
  -1   8   2   19086     900
  -1   8   2   17668    1050
   0  -8  -2    7303     380
   0  -8  -2   10380     480
   0   8   2    8117     440
   0   8   2    8867     400
  -1  -8  -2   19798    1040
  -1  -8  -2   19648    1010
   1   8   2   21029     990
   1   8   2   18054    1060
  -2  -8  -2    9708     520
  -2  -8  -2    9778     500
   2   8   2    9837     570
   2   8   2   10478     530
  -3  -8  -2    9978     640
   3   8   2   10920     700
   3   8   2   10748     740
  -4  -8  -2   10103     530
   4   8   2    9601     620
   4   8   2    9397     650
  -5  -8  -2    2282     290
   5   8   2    1412     380
   5   8   2    1617     400
   6   8   2      29     360
   6   8   2      29     330
   7   8   2      15     390
   7   8   2      49     380
   8   8   2     468     420
   8   8   2      16     400
   9   8   2     826     460
   9   8   2     636     460
   8  -9  -2      69     400
   8  -9  -2      61     330
   8  -9  -2       7     390
   7  -9  -2     245     380
   7  -9  -2      61     340
   7  -9  -2     747     360
   6  -9  -2    2439     430
   6  -9  -2    2120     430
   6  -9  -2    1395     420
   5  -9  -2    1731     380
   5  -9  -2    2434     390
   5  -9  -2    2599     420
   4  -9  -2     986     360
   4  -9  -2    1273     360
   4  -9  -2    1231     300
  -4   9   2    1633     220
   3  -9  -2     145     330
   3  -9  -2       0     240
   3  -9  -2       0     300
   3  -9  -2       0     170
  -3   9   2       0     200
   2  -9  -2      75     310
   2  -9  -2     534     210
   2  -9  -2     455     290
   2  -9  -2     177     190
  -2   9   2     140     220
   1  -9  -2     288     320
   1  -9  -2      37     180
   1  -9  -2       5     290
  -1   9   2      83     230
  -1   9   2     341     320
  -1  -9  -2       5     280
  -1  -9  -2     328     290
   1   9   2       5     250
   1   9   2     373     360
  -2  -9  -2     537     280
  -2  -9  -2       6     310
   2   9   2     413     360
   2   9   2     682     310
  -3  -9  -2     139     260
   3   9   2       0     310
   3   9   2     189     370
  -4  -9  -2    1017     280
   4   9   2    1529     410
   4   9   2    1603     370
   5   9   2    2325     470
   5   9   2    2736     460
   6   9   2    2435     520
   6   9   2    2276     490
   7   9   2      61     430
   7   9   2       3     400
   8   9   2     320     470
   8   9   2     149     450
   8 -10  -2     108     380
   8 -10  -2       1     410
   7 -10  -2     428     420
   7 -10  -2     603     400
   7 -10  -2    1023     410
   6 -10  -2     928     390
   6 -10  -2    1330     410
   6 -10  -2    1139     420
   5 -10  -2    1923     440
   5 -10  -2    1160     350
   5 -10  -2    1070     400
   4 -10  -2     717     390
   4 -10  -2     543     310
   4 -10  -2    1616     400
   3 -10  -2    1411     400
   3 -10  -2    1541     380
   3 -10  -2    1401     300
  -3  10   2    1131     260
   2 -10  -2     995     330
   2 -10  -2    1933     410
   2 -10  -2    1475     260
  -2  10   2    1053     270
   1 -10  -2    5401     580
   1 -10  -2    5338     560
  -1  10   2    3594     530
  -1  10   2    4740     450
   0 -10  -2   15858     790
   0 -10  -2   16674     830
   0  10   2   14955     710
   0  10   2   16123     890
  -1 -10  -2    4323     530
  -1 -10  -2    5810     560
   1  10   2    3983     570
   1  10   2    4629     480
  -2 -10  -2    1173     380
  -2 -10  -2    1196     330
   2  10   2     988     410
   2  10   2    1196     350
  -3 -10  -2    1899     360
   3  10   2    1899     400
   3  10   2    1449     460
  -4 -10  -2     988     320
   4  10   2     320     360
   4  10   2     959     450
   5  10   2     979     450
   5  10   2     567     450
   6  10   2    1546     490
   6  10   2    1185     490
   7  10   2     508     470
   7  10   2     918     520
   8  10   2       1     480
   7 -11  -2      17     430
   7 -11  -2      17     410
   7 -11  -2     401     420
   6 -11  -2     309     390
   6 -11  -2      25     360
   6 -11  -2     223     350
   5 -11  -2     251     340
   5 -11  -2     424     420
   5 -11  -2     197     410
   4 -11  -2     348     370
   4 -11  -2     793     320
   4 -11  -2     265     360
   3 -11  -2     186     280
   3 -11  -2     195     380
   3 -11  -2     229     380
   2 -11  -2     982     410
   2 -11  -2    1001     430
   2 -11  -2    1049     280
  -2  11   2     558     280
   1 -11  -2     201     390
   1 -11  -2     499     400
  -1  11   2     321     300
  -1  11   2     348     460
  -1 -11  -2     760     380
  -1 -11  -2     587     370
   1  11   2       7     320
   1  11   2     769     460
  -2 -11  -2     847     350
  -2 -11  -2    1069     390
   2  11   2    1157     460
   2  11   2     982     370
  -3 -11  -2       7     310
   3  11   2       7     420
   3  11   2       7     340
   4  11   2     545     500
   4  11   2     669     410
   5  11   2     848     530
   5  11   2    1038     470
   6  11   2      24     480
   6  11   2    1066     460
   7  11   2      18     490
   7  11   2     219     560
   6 -12  -2     127     460
   5 -12  -2       4     410
   5 -12  -2       4     340
   5 -12  -2     132     430
   4 -12  -2     201     410
   4 -12  -2     336     440
   3 -12  -2     170     420
   3 -12  -2     243     420
   2 -12  -2     369     370
   2 -12  -2     606     440
  -2  12   2     323     310
   1 -12  -2      60     370
   1 -12  -2       8     390
  -1  12   2     447     340
  -1  12   2       8     440
   0 -12  -2    1438     460
   0 -12  -2    2039     440
   0  12   2    1396     520
   0  12   2    1956     370
  -1 -12  -2     467     390
  -1 -12  -2     131     400
   1  12   2       8     350
   1  12   2     396     470
  -2 -12  -2     284     360
   2  12   2     443     380
   2  12   2     566     510
   3  12   2     579     440
   3  12   2     438     510
   4  12   2     748     480
   4  12   2     348     540
   5  12   2       4     540
   5  12   2     148     460
   4 -13  -2     781     470
   4 -13  -2     240     450
   3 -13  -2    1560     520
   3 -13  -2     832     460
   2 -13  -2    1265     510
   2 -13  -2    2540     550
   1 -13  -2     245     440
   1 -13  -2     255     440
  -1  13   2      36     510
  -1 -13  -2     353     420
  -1 -13  -2       0     410
   1  13   2     159     390
   1  13   2       0     520
  -2 -13  -2    2577     490
   2  13   2    1358     600
   2  13   2    2101     500
   3  13   2    1486     600
   3  13   2     981     470
   4  13   2      11     460
   4  13   2    1452     580
   1 -14  -2       5     450
   1 -14  -2     102     500
   0 -14  -2     240     480
   0 -14  -2     666     480
   0  14   2     433     600
  -1 -14  -2       6     490
  -1 -14  -2    1214     490
   1  14   2     726     600
   1  14   2    1020     460
   1  14  -3    3967     730
   1  14  -3    5054     620
  -1 -14   3    4976     670
   0  14  -3    2159     640
   0 -14   3    2827     570
   0 -14   3    3123     620
  -1  14  -3    4406     760
   1 -14   3    5563     730
   4  13  -3     612     510
   4  13  -3     864     640
   3  13  -3     631     540
   3  13  -3      21     380
   2  13  -3      16     490
   2  13  -3      16     400
  -2 -13   3     147     420
  -2 -13   3      16     390
   1  13  -3     732     530
   1  13  -3       0     360
  -1 -13   3     302     420
  -1 -13   3     370     420
  -1  13  -3     305     480
   1 -13   3     150     420
   1 -13   3     159     430
  -2  13  -3     467     520
   2 -13   3      15     420
   2 -13   3      15     420
   3 -13   3      22     430
   3 -13   3     766     430
   4 -13   3       1     440
   4 -13   3       1     460
   5  12  -3    1405     590
   5  12  -3    1059     480
   4  12  -3    2460     540
   4  12  -3     978     520
   3  12  -3    9623     740
   3  12  -3    8433     850
   2  12  -3    4062     650
   2  12  -3    4775     520
  -2 -12   3    4592     540
  -2 -12   3    4337     540
   1  12  -3    7643     800
   1  12  -3    8334     640
  -1 -12   3    9266     700
  -1 -12   3    9917     750
   0  12  -3   15635    1060
   0  12  -3   16213     830
   0 -12   3   17610     970
   0 -12   3   14299     890
  -1  12  -3    8853     810
  -1  12  -3    8683     610
   1 -12   3    8342     690
   1 -12   3   10677     800
  -2  12  -3    3423     600
   2 -12   3    4442     570
   2 -12   3    3464     530
   3 -12   3   10554     830
   3 -12   3   11766     880
   4 -12   3    1897     490
   4 -12   3    1539     480
   5 -12   3    1509     500
   5 -12   3     787     370
   5 -12   3    1449     480
   7  11  -3    1238     610
   7  11  -3    2817     610
   6  11  -3       9     490
   6  11  -3       9     470
   5  11  -3    1859     580
   5  11  -3    1352     480
   4  11  -3    4064     610
   4  11  -3    4590     540
   3  11  -3    1496     520
   3  11  -3    2303     450
  -3 -11   3    1841     400
   2  11  -3       4     390
   2  11  -3       4     330
  -2 -11   3     101     350
  -2 -11   3     145     330
   1  11  -3     268     320
   1  11  -3       7     410
  -1 -11   3     543     360
  -1 -11   3     487     350
  -1  11  -3       6     260
  -1  11  -3       6     420
   1 -11   3      78     320
   1 -11   3       6     360
  -2  11  -3       4     240
  -2  11  -3       4     400
   2 -11   3     236     360
   2 -11   3       4     210
   2 -11   3     145     370
   3 -11   3    2619     460
   3 -11   3    2089     450
   3 -11   3    2503     350
   4 -11   3    4278     520
   4 -11   3    4299     440
   4 -11   3    3700     530
   5 -11   3    1421     460
   5 -11   3    2138     470
   5 -11   3    1769     400
   6 -11   3     539     430
   6 -11   3     219     390
   6 -11   3     219     350
   7 -11   3    1239     450
   7 -11   3    1170     510
   7 -11   3    2373     510
   7  10  -3     807     490
   7  10  -3     668     520
   6  10  -3    1134     510
   6  10  -3     869     440
   5  10  -3     929     480
   5  10  -3     707     410
   4  10  -3    3183     540
   4  10  -3    2391     450
  -4 -10   3    3425     420
   3  10  -3     333     330
   3  10  -3     147     400
  -3 -10   3     415     300
   2  10  -3    2725     390
   2  10  -3    2315     490
  -2 -10   3    2072     380
  -2 -10   3    2483     380
   1  10  -3    1952     450
   1  10  -3    3331     390
  -1 -10   3    2368     420
  -1 -10   3    2727     410
   0  10  -3    1851     450
   0  10  -3    2078     330
   0 -10   3    1258     370
   0 -10   3    2677     420
  -1  10  -3    2786     340
  -1  10  -3    2051     490
   1 -10   3    3311     450
   1 -10   3    1925     390
   1 -10   3    2515     270
  -2  10  -3    2132     460
  -2  10  -3    2428     290
   2 -10   3    1824     270
   2 -10   3    1685     380
   2 -10   3    2681     420
  -3  10  -3       9     190
   3 -10   3     525     370
   3 -10   3     164     330
   3 -10   3      18     230
   4 -10   3    3574     490
   4 -10   3    2570     370
   4 -10   3    2012     420
   5 -10   3     744     400
   5 -10   3     698     320
   5 -10   3     679     380
   6 -10   3     420     370
   6 -10   3     565     360
   6 -10   3    1538     420
   7 -10   3     739     380
   7 -10   3     451     390
   7 -10   3     858     380
   8 -10   3      27     350
   8   9  -3    4507     600
   8   9  -3    4762     640
   7   9  -3    7254     710
   7   9  -3    6671     700
   6   9  -3   18398     950
   6   9  -3   13536     930
   5   9  -3    6072     650
   5   9  -3    9250     700
   4   9  -3    4271     480
   4   9  -3    3705     510
  -4  -9   3    4177     390
   3   9  -3    4361     460
   3   9  -3    3615     510
  -3  -9   3    3813     420
   2   9  -3    5765     530
   2   9  -3    6874     470
  -2  -9   3    5776     450
  -2  -9   3    6465     470
   1   9  -3    3172     480
   1   9  -3    3369     380
  -1  -9   3    2788     400
  -1  -9   3    2938     390
  -1   9  -3    3110     480
  -1   9  -3    2848     310
   1  -9   3    2904     410
   1  -9   3    3091     280
   1  -9   3    2690     380
  -2   9  -3    6109     370
  -2   9  -3    5112     520
   2  -9   3    5351     380
   2  -9   3    6271     470
   2  -9   3    5699     500
  -3   9  -3    4040     310
   3  -9   3    3870     460
   3  -9   3    4606     490
   3  -9   3    4077     400
   4  -9   3    3806     390
   4  -9   3    3144     420
   4  -9   3    3470     460
   5  -9   3    7399     630
   5  -9   3    8275     650
   5  -9   3    9563     690
   6  -9   3   17020     920
   6  -9   3   15956     880
   6  -9   3   15314     870
   7  -9   3    4904     570
   7  -9   3    8202     670
   7  -9   3    7105     630
   8  -9   3    4762     610
   8  -9   3    4589     520
   8  -9   3    5168     600
   9   8  -3       6     450
   9   8  -3       6     450
   8   8  -3     851     480
   8   8  -3     851     420
   7   8  -3     343     390
   7   8  -3     925     420
   6   8  -3     931     400
   6   8  -3     502     390
   5   8  -3      32     320
   5   8  -3      32     340
  -5  -8   3     187     220
   4   8  -3    3563     480
   4   8  -3    3719     430
  -4  -8   3    3748     360
   3   8  -3    1795     400
   3   8  -3    1938     350
  -3  -8   3    1728     290
   2   8  -3    1026     340
   2   8  -3     936     270
  -2  -8   3     868     280
  -2  -8   3     661     250
   1   8  -3    7990     580
   1   8  -3    8021     460
  -1  -8   3    7572     510
  -1  -8   3    8491     520
   0   8  -3   29777    1280
   0   8  -3   28985    1130
   0  -8   3   30558    1090
   0  -8   3   30363    1250
   0  -8   3   30646    1180
  -1   8  -3    7650     400
  -1   8  -3    8047     580
   1  -8   3    7984     540
   1  -8   3    7619     510
   1  -8   3    7327     380
  -2   8  -3     355     170
  -2   8  -3     145     270
   2  -8   3     440     280
   2  -8   3     428     240
   2  -8   3     404     200
  -3   8  -3    1838     200
   3  -8   3    1723     340
   3  -8   3    1087     270
   3  -8   3    1953     370
   4  -8   3    3650     410
   4  -8   3    3308     440
   4  -8   3    3758     410
   5  -8   3     222     310
   5  -8   3      13     280
   5  -8   3      32     270
   6  -8   3     586     350
   6  -8   3     501     330
   6  -8   3     657     320
   7  -8   3     480     340
   7  -8   3     677     370
   7  -8   3     555     310
   8  -8   3    1004     400
   8  -8   3     948     400
   8  -8   3     824     340
   9  -8   3     250     310
   9  -8   3     198     420
   9  -8   3      90     390
   9   7  -3    4740     650
   9   7  -3    4878     600
   8   7  -3    4781     580
   8   7  -3    5665     600
   7   7  -3    6853     450
   7   7  -3    6545     610
   7   7  -3    6767     660
   6   7  -3    5119     500
   6   7  -3    4452     280
   6   7  -3    4597     460
   5   7  -3    7878     380
   5   7  -3    8881     650
   5   7  -3    7621     650
  -5  -7   3    8508     480
   4   7  -3    3823     400
   4   7  -3    4002     430
  -4  -7   3    3622     310
   3   7  -3    3128     370
   3   7  -3    3212     410
  -3  -7   3    3539     340
   2   7  -3    4694     360
   2   7  -3    4901     440
  -2  -7   3    4528     360
  -2  -7   3    5242     370
   1   7  -3    2698     280
   1   7  -3    2240     340
  -1  -7   3    2297     280
  -1  -7   3    3043     330
  -1   7  -3    2463     230
  -1   7  -3    1496     300
   1  -7   3    2434     310
   1  -7   3    2768     340
   1  -7   3    2329     220
  -2   7  -3    4656     280
  -2   7  -3    5947     450
   2  -7   3    4531     330
   2  -7   3    4718     380
   2  -7   3    3670     360
  -3   7  -3    2787     230
   3  -7   3    2694     330
   3  -7   3    3450     390
   3  -7   3    2657     320
   4  -7   3    3565     380
   4  -7   3    2833     350
   4  -7   3    3184     350
   5  -7   3    8505     610
   5  -7   3    7349     600
   5  -7   3    7235     600
   6  -7   3    3894     420
   6  -7   3    3522     380
   6  -7   3    4743     450
   7  -7   3    7871     650
   7  -7   3    6544     650
   7  -7   3    7804     590
   8  -7   3    4622     540
   8  -7   3    4813     460
   8  -7   3    4280     560
   9  -7   3    4346     560
   9  -7   3    4247     590
   9  -7   3    5228     480
  10   6  -3     114     420
  10   6  -3      35     320
  10   6  -3      48     420
   9   6  -3     517     400
   9   6  -3     637     410
   8   6  -3    2349     460
   8   6  -3    2978     350
   8   6  -3    2958     470
   7   6  -3    1526     260
   7   6  -3    1232     370
   7   6  -3    1526     360
   6   6  -3    2269     400
   6   6  -3    2525     270
   6   6  -3    2052     400
  -6  -6   3    2231     230
   5   6  -3   14986     710
   5   6  -3   15409     570
   5   6  -3   15420     760
  -5  -6   3   14624     590
   4   6  -3    5438     490
   4   6  -3    4710     440
   4   6  -3    5561     270
  -4  -6   3    5012     360
   3   6  -3   23018     960
   3   6  -3   23986     910
   3   6  -3   23996     840
  -3  -6   3   23365     880
   2   6  -3   44410    1710
   2   6  -3   43486    1540
   2   6  -3   45228    1590
  -2  -6   3   43408    1640
  -2  -6   3   44021    1560
   1   6  -3   22526     810
   1   6  -3   24003     800
   1   6  -3   24305     920
  -1  -6   3   23806     810
  -1  -6   3   22588     860
   0   6  -3    1146     270
   0   6  -3    1768     210
   0   6  -3    2012     230
   0  -6   3    1900     250
   0  -6   3    1257     240
   0  -6   3    1638     150
  -1   6  -3   23691     820
  -1   6  -3   23150     760
  -1   6  -3   24190     910
   1  -6   3   23836     810
   1  -6   3   23816     830
   1  -6   3   23472     880
   1  -6   3   23285     880
  -2   6  -3   43582    1710
  -2   6  -3   42881    1500
   2  -6   3   47946    1680
   2  -6   3   44263    1590
   2  -6   3   44020    1680
   2  -6   3   44721    1650
  -3   6  -3   22883     740
   3  -6   3   23626     890
   3  -6   3   24380     920
   3  -6   3   23270     930
   3  -6   3   23708     920
   4  -6   3    4757     420
   4  -6   3    5182     450
   4  -6   3    4832     430
   4  -6   3    4908     430
   5  -6   3   15433     680
   5  -6   3   13883     690
   5  -6   3   14338     730
   5  -6   3   14648     670
   6  -6   3    2392     340
   6  -6   3    2383     380
   6  -6   3    2194     320
   6  -6   3    2468     410
   7  -6   3    1459     330
   7  -6   3    1605     390
   7  -6   3     922     270
   8  -6   3    3297     370
   8  -6   3    1926     430
   8  -6   3    2429     430
   9  -6   3     582     390
   9  -6   3       4     370
   9  -6   3     461     250
  10  -6   3      49     260
  10  -6   3     116     400
  10  -6   3      42     410
  10   5  -3     765     340
  10   5  -3    1132     350
  10   5  -3     563     420
  10   5  -3      16     380
   9   5  -3      55     290
   9   5  -3     305     280
   9   5  -3       1     350
   9   5  -3     286     350
   8   5  -3     162     250
   8   5  -3       5     310
   8   5  -3       5     320
   7   5  -3      20     290
   7   5  -3      10     200
   7   5  -3      10     290
   6   5  -3    1967     350
   6   5  -3    1257     310
   6   5  -3    1675     240
  -6  -5   3    1633     160
   5   5  -3     482     260
   5   5  -3     561     260
   5   5  -3      32     160
  -5  -5   3      32     130
   4   5  -3      26     230
   4   5  -3       2     150
   4   5  -3      65     240
   4   5  -3      26     110
  -4  -5   3      26     130
   3   5  -3     108     140
   3   5  -3       0     190
   3   5  -3      76      80
   3   5  -3      45     210
  -3  -5   3     128     130
  -3  -5   3     128     150
   2   5  -3     529     220
   2   5  -3     113     180
   2   5  -3     508     150
  -2  -5   3     322     150
  -2  -5   3     518     170
  -2  -5   3     560     190
   1   5  -3    4608     310
   1   5  -3    4708     290
   1   5  -3    4778     370
  -1  -5   3    4109     310
  -1  -5   3    4338     290
  -1  -5   3    3999     300
  -1  -5   3    4778     320
  -1   5  -3    4531     360
  -1   5  -3    4931     310
  -1   5  -3    4181     240
   1  -5   3    4481     330
   1  -5   3    4901     350
   1  -5   3    4251     320
   1  -5   3    4891     350
  -2   5  -3     350     100
  -2   5  -3     453     220
  -2   5  -3     474     180
   2  -5   3     319     200
   2  -5   3     443     170
   2  -5   3     319     190
   2  -5   3     361     170
   3  -5   3     190     180
   3  -5   3      23     170
   3  -5   3     475     200
   3  -5   3     353     230
   4  -5   3      25     160
   4  -5   3       5     200
   4  -5   3      25     180
   5  -5   3      31     240
   5  -5   3      31     200
   5  -5   3     479     240
   5  -5   3      31     180
   6  -5   3    1328     280
   6  -5   3    1891     360
   6  -5   3    1756     250
   6  -5   3    1777     280
   7  -5   3      42     250
   7  -5   3       9     280
   7  -5   3      15     210
   8  -5   3     239     220
   8  -5   3     695     340
   8  -5   3       5     340
   9  -5   3      36     370
   9  -5   3     770     340
   9  -5   3      71     220
  10  -5   3    1138     410
  10  -5   3     897     240
  10  -5   3     567     410
  10   4  -3     843     410
  10   4  -3    1122     380
  10   4  -3     463     340
  10   4  -3     624     360
   9   4  -3    6918     590
   9   4  -3    7829     590
   9   4  -3    7284     650
   9   4  -3    8315     610
   8   4  -3    7526     590
   8   4  -3    7766     560
   8   4  -3    8266     640
   8   4  -3    7636     550
   7   4  -3    9529     630
   7   4  -3   10518     580
   7   4  -3   11251     670
   6   4  -3   20574     980
   6   4  -3   20661     900
   6   4  -3   21338     940
   5   4  -3    6059     340
   5   4  -3    5708     400
   5   4  -3    5299     360
  -5  -4   3    6136     240
  -5  -4   3    5917     240
   4   4  -3   33915    1280
   4   4  -3   33547    1260
   4   4  -3   32869    1350
  -4  -4   3   35406    1240
  -4  -4   3   33702    1230
   3   4  -3   97041    2830
   3   4  -3   92054    2880
   3   4  -3   92198    3060
   3   4  -3   93652    2970
  -3  -4   3   99026    2970
  -3  -4   3   94082    3060
  -3  -4   3   93406    2970
   2   4  -3   96730    3370
   2   4  -3  100560    3580
   2   4  -3  100290    3320
  -2  -4   3   95095    3500
  -2  -4   3  102206    3580
   1   4  -3    9865     330
   1   4  -3    9721     320
   1   4  -3    9656     290
   1   4  -3    9969     340
  -1  -4   3    9969     320
  -1  -4   3   10463     310
   0   4  -3    6532     480
   0   4  -3    5967     520
   0   4  -3    7434     490
   0   4  -3    5796     530
   0  -4   3    6424     530
   0  -4   3    7047     500
   0  -4   3    6216     520
  -1   4  -3    9990     340
  -1   4  -3   10016     350
  -1   4  -3    9821     310
  -1   4  -3    9324     250
   1  -4   3   10327     340
   1  -4   3    9416     330
   1  -4   3    9547     320
   1  -4   3    9586     320
  -2   4  -3  100438    3390
  -2   4  -3   99543    3330
  -2   4  -3   99947    3620
   2  -4   3   98572    3390
   2  -4   3  102055    3580
   2  -4   3  102141    3620
   2  -4   3   98533    3580
  -3   4  -3   99527    2960
   3  -4   3   95780    3100
   3  -4   3   98054    3100
   3  -4   3   99722    3150
   3  -4   3   94858    2950
   4  -4   3   34715    1350
   4  -4   3   35907    1310
   4  -4   3   32693    1260
   4  -4   3   33234    1300
   5  -4   3    4837     340
   5  -4   3    6195     360
   5  -4   3    6174     350
   6  -4   3   21207     750
   6  -4   3   20907    1020
   6  -4   3   21139     750
   6  -4   3   21710     900
   6  -4   3   21439     940
   6  -4   3   21749     910
   7  -4   3   10703     630
   7  -4   3    9978     690
   7  -4   3   10141     520
   7  -4   3   10591     400
   7  -4   3   11152     410
   7  -4   3   10090     530
   8  -4   3    7204     570
   8  -4   3    7814     630
   8  -4   3    7714     460
   9  -4   3    6949     600
   9  -4   3    7743     700
   9  -4   3    8101     470
  10  -4   3     828     390
  10  -4   3     847     220
  10  -4   3     637     420
  11   3  -3      40     360
  11   3  -3      81     350
  11   3  -3      14     390
  11   3  -3     104     370
  10   3  -3     612     330
  10   3  -3    1224     390
  10   3  -3     871     360
  10   3  -3    1434     420
   9   3  -3    3753     490
   9   3  -3    4107     460
   9   3  -3    3571     420
   9   3  -3    3915     460
   8   3  -3    1475     300
   8   3  -3    1734     340
   8   3  -3    2449     390
   8   3  -3    1927     350
   7   3  -3       0     250
   7   3  -3     249     270
   7   3  -3       0     270
   7   3  -3      10     240
   6   3  -3    3539     360
   6   3  -3    2998     360
   6   3  -3    3530     400
   5   3  -3     211     200
   5   3  -3      81     170
   5   3  -3     358     180
   4   3  -3     795     250
   4   3  -3    1249     220
  -4  -3   3     808     140
  -4  -3   3     860     160
   3   3  -3      76     160
   3   3  -3     219     100
  -3  -3   3     219     140
  -3  -3   3     219      90
  -3  -3   3     219      90
   2   3  -3    2106     190
   2   3  -3    1506     140
   2   3  -3    1664     170
   2   3  -3    1778     220
  -2  -3   3    1804     190
  -2  -3   3    1990     190
   1   3  -3    9486     420
   1   3  -3    9125     340
   1   3  -3    8299     370
  -1  -3   3    8877     350
  -1  -3   3    9012     370
  -1   3  -3    9561     370
  -1   3  -3    8745     380
  -1   3  -3    9003     310
  -1   3  -3    9385     410
   1  -3   3    9654     400
   1  -3   3    8703     370
   1  -3   3    8889     390
  -2   3  -3    2078     210
  -2   3  -3    1575     200
   2  -3   3    1698     210
   2  -3   3    1462     200
   2  -3   3    1601     180
  -3   3  -3     105      30
  -3   3  -3      87     130
   3  -3   3      75     160
   3  -3   3     216     130
   3  -3   3      77     150
   3  -3   3     101     130
   4  -3   3     855     130
   4  -3   3     823     200
   4  -3   3     842     210
   4  -3   3     915     120
   4  -3   3    1009     260
   5  -3   3     325     180
   5  -3   3      81     130
   5  -3   3     544     150
   5  -3   3     233      90
   6  -3   3    2544     230
   6  -3   3    2992     300
   6  -3   3    3245     290
   6  -3   3    2785     350
   7  -3   3     244     280
   7  -3   3       0     170
   7  -3   3     112     160
   7  -3   3       0     270
   7  -3   3     112     150
   8  -3   3    1985     360
   8  -3   3    1316     370
   8  -3   3    1803     210
   9  -3   3    3946     310
   9  -3   3    3815     550
   9  -3   3    3070     440
  10  -3   3    1072     400
  10  -3   3     723     430
  10  -3   3     937     190
  11  -3   3      14     350
  11  -3   3       8     410
  11   2  -3    1354     390
  11   2  -3    2185     410
  11   2  -3    1313     420
  11   2  -3    2379     470
  10   2  -3     385     340
  10   2  -3     587     360
  10   2  -3     278     310
  10   2  -3     349     310
   9   2  -3      16     280
   9   2  -3      16     280
   9   2  -3      39     270
   9   2  -3      16     300
   8   2  -3    6087     530
   8   2  -3    6285     490
   8   2  -3    6167     550
   8   2  -3    6483     500
   7   2  -3   22215     930
   7   2  -3   22275     980
   7   2  -3   22975    1000
   7   2  -3   21615     890
   6   2  -3   11834     580
   6   2  -3   13075     620
   6   2  -3   12575     640
   6   2  -3   12035     570
   5   2  -3   21084     880
   5   2  -3   21233     860
   4   2  -3   22008     890
   4   2  -3   20833     840
  -4  -2   3   22314     740
  -4  -2   3   21830     740
   3   2  -3    8538     300
   3   2  -3    9227     400
   3   2  -3    8924     360
  -3  -2   3    8632     300
   2   2  -3     784     100
   2   2  -3    1005     160
   2   2  -3     579      90
  -2  -2   3     708      90
  -2  -2   3     944     150
   1   2  -3   16316     350
   1   2  -3   16074     420
   1   2  -3   16393     380
  -1  -2   3   16507     380
  -1  -2   3   15780     350
  -1  -2   3   14063     390
  -1  -2   3   16087     350
   0   2  -3   31531    1430
   0   2  -3   33600    1550
   0   2  -3   29167    1530
   0  -2   3   31922    1430
   0  -2   3   33316    1550
  -1   2  -3   16069     410
  -1   2  -3   16414     390
  -1   2  -3   16159     410
   1  -2   3   16464     390
   1  -2   3   16706     410
   1  -2   3   16133     410
  -2   2  -3     138      60
  -2   2  -3     471     120
   2  -2   3     592     130
   2  -2   3     644     120
   2  -2   3    1172     140
  -3   2  -3    8734     360
   3  -2   3    8974     280
   3  -2   3    8703     390
   3  -2   3    8547     360
  -4   2  -3   22547     830
   4  -2   3   22152     820
   4  -2   3   22211     840
   4  -2   3   22202     820
   4  -2   3   22132     750
   5  -2   3   21019     830
   5  -2   3   20552     780
   5  -2   3   21766     730
   5  -2   3   21407     780
   6  -2   3   12585     630
   6  -2   3   13005     530
   6  -2   3   12915     520
   6  -2   3   13606     530
   7  -2   3   23575     840
   7  -2   3   22226     840
   7  -2   3   23336     970
   7  -2   3   22846     830
   8  -2   3    5247     550
   8  -2   3    6788     340
   8  -2   3    6254     390
   8  -2   3    6096     340
   8  -2   3    6106     520
   9  -2   3     215     350
   9  -2   3      54     120
   9  -2   3      15     200
   9  -2   3     511     340
  10  -2   3     828     390
  10  -2   3     623     370
  11  -2   3    2914     530
  11  -2   3    2033     470
  11   1  -3    6836     590
  11   1  -3    5812     620
  11   1  -3    6381     660
  11   1  -3    4951     530
  10   1  -3    4979     540
  10   1  -3    5142     500
  10   1  -3    4456     520
  10   1  -3    4497     470
   9   1  -3    1682     390
   9   1  -3    2229     350
   9   1  -3    1832     360
   9   1  -3    1012     370
   8   1  -3    3523     370
   8   1  -3    4337     440
   8   1  -3    3931     380
   8   1  -3    2703     390
   7   1  -3   11778     700
   7   1  -3   10940     630
   7   1  -3   11929     620
   7   1  -3   10301     700
   6   1  -3    8052     490
   6   1  -3    7425     540
   5   1  -3    3184     220
   5   1  -3    4010     200
   4   1  -3     261     190
   4   1  -3     246     180
   3   1  -3     127     120
   3   1  -3     117     200
  -3  -1   3     121     110
   2   1  -3     845     190
   2   1  -3     851     130
   2   1  -3    1042     170
  -2  -1   3    1116     190
  -2  -1   3     806     130
   1   1  -3     974     150
   1   1  -3     826     120
   1   1  -3     839     110
  -1  -1   3     967     120
  -1  -1   3     947     120
  -1   1  -3    1143     130
  -1   1  -3     978      90
  -1   1  -3     870     120
  -1   1  -3     937     140
   1  -1   3     937     130
   1  -1   3     897     140
   1  -1   3    1095      90
   1  -1   3     937     140
  -2   1  -3     772     140
   2  -1   3     715     160
   2  -1   3     784     140
   2  -1   3     797     120
  -3   1  -3     155     170
   3  -1   3     160     170
   3  -1   3     114     170
   3  -1   3     122     210
  -4   1  -3     272     110
   4  -1   3     281     130
   4  -1   3     338     170
   4  -1   3     274     110
   5  -1   3    3767     130
   5  -1   3    3493     170
   5  -1   3    3785     240
   5  -1   3    3658     130
   6  -1   3    7566     430
   6  -1   3    8120     520
   6  -1   3    7400     370
   6  -1   3    7492     370
   7  -1   3   10633     470
   7  -1   3   11620     660
   7  -1   3   10333     470
   7  -1   3   10793     550
   8  -1   3    3236     450
   8  -1   3    3344     190
   8  -1   3    3129     180
   8  -1   3    5062     460
   8  -1   3    3891     310
   9  -1   3    2175     310
   9  -1   3    1920     380
   9  -1   3    2298     450
  10  -1   3    4489     410
  10  -1   3    4961     540
  10  -1   3    4817     560
  11  -1   3    7567     690
  11  -1   3    5871     640
  11  -1   3    6286     610
  11  -1  -3    6258     660
  11  -1  -3    7178     600
  10  -1  -3    4746     490
  10  -1  -3    4531     570
  10  -1  -3    5554     460
   9  -1  -3    2444     440
   9  -1  -3    2141     370
   9  -1  -3    1717     320
   8  -1  -3    4554     480
   8  -1  -3    3923     320
   8  -1  -3    3429     380
   7  -1  -3   10389     450
   7  -1  -3   10689     450
   7  -1  -3   10727     710
   7  -1  -3   10041     610
   6  -1  -3    7115     360
   6  -1  -3    7999     360
   6  -1  -3    7427     490
   6  -1  -3    7381     560
   5  -1  -3    3319     250
   5  -1  -3    3617     120
   5  -1  -3    3745     130
   5  -1  -3    3726     210
  -5   1   3    3562     190
   4  -1  -3     280     110
   4  -1  -3     252     210
   4  -1  -3     324     160
  -4   1   3     254     110
   3  -1  -3     262     220
   3  -1  -3      73     220
   3  -1  -3     122     170
  -3   1   3     120     170
  -3   1   3     194     210
   2  -1  -3     912     150
   2  -1  -3    1004     180
   2  -1  -3    1550     220
   2  -1  -3    1011     170
  -2   1   3     821     170
  -2   1   3     815     170
  -2   1   3    1214     180
   1  -1  -3     991     130
   1  -1  -3    1087     130
   1  -1  -3    1115     150
   1  -1  -3     930     130
  -1   1   3     963     140
  -1   1   3     896     130
  -1   1   3     936     130
  -1  -1  -3     953     120
  -1  -1  -3     981     140
  -1  -1  -3     994     120
   1   1   3     879     120
   1   1   3     994     120
   1   1   3    1104     140
  -2  -1  -3    1056     170
  -2  -1  -3     787     140
   2   1   3    1448     190
   2   1   3     839     140
   2   1   3     989     180
  -3  -1  -3     163     130
   3   1   3     156     210
   3   1   3      60     190
   3   1   3     163     130
   4   1   3     247     180
   4   1   3     255      80
   4   1   3     252     180
   5   1   3    3476     200
   5   1   3    3823     200
   6   1   3    7941     530
   6   1   3    8977     520
   6   1   3    7084     490
   7   1   3   12002     680
   7   1   3   11918     680
   7   1   3   11918     640
   8   1   3    4255     370
   8   1   3    4170     400
   8   1   3    3613     440
   8   1   3    3538     400
   9   1   3    2333     350
   9   1   3    1852     390
   9   1   3    2012     380
   9   1   3    1169     360
  10   1   3    4289     440
  10   1   3    4843     510
  10   1   3    5027     530
  10   1   3    5057     560
  11   1   3    5525     610
  11   1   3    5867     580
  11   1   3    5535     580
  11   1   3    5142     490
  11  -2  -3    1229     400
  11  -2  -3    1568     490
  10  -2  -3     798     410
  10  -2  -3     321     320
   9  -2  -3       4     120
   9  -2  -3      59     280
   9  -2  -3     163     220
   9  -2  -3     309     340
   8  -2  -3    6634     530
   8  -2  -3    6822     340
   8  -2  -3    5930     340
   8  -2  -3    7664     630
   7  -2  -3   22107     920
   7  -2  -3   21597     820
   7  -2  -3   23018    1030
   7  -2  -3   22948     820
   6  -2  -3   12732     520
   6  -2  -3   12342     680
   6  -2  -3   12892     600
   6  -2  -3   12722     510
   5  -2  -3   21390     890
   5  -2  -3   20595     760
   5  -2  -3   20774     770
   5  -2  -3   20107     800
   4  -2  -3   22950     800
   4  -2  -3   20264     800
   4  -2  -3   23206     770
   4  -2  -3   20076     870
  -4   2   3   19997     790
  -4   2   3   22950     820
   3  -2  -3    8457     370
   3  -2  -3    8905     400
   3  -2  -3    8290     350
   3  -2  -3    9218     330
  -3   2   3    9145     350
  -3   2   3    8676     360
   2  -2  -3     644     140
   2  -2  -3     809     110
   2  -2  -3     670     120
   2  -2  -3     721     140
  -2   2   3     644     140
  -2   2   3     809     120
  -2   2   3     592     100
  -2   2   3     932     140
   1  -2  -3   16180     400
   1  -2  -3   15746     390
   1  -2  -3   15001     400
   1  -2  -3   15963     360
  -1   2   3   15720     390
  -1   2   3   15938     360
  -1   2   3   15963     380
   0  -2  -3   31066    1400
   0  -2  -3   32281    1490
   0  -2  -3   30792    1400
   0  -2  -3   29408    1470
   0   2   3   30145    1400
   0   2   3   31041    1470
   0   2   3   30361    1470
   0   2   3   26312    1390
   0   2   3   32498    1490
  -1  -2  -3   18248     430
  -1  -2  -3   16962     420
   1   2   3   18248     420
   1   2   3   16911     430
   1   2   3   17946     440
   1   2   3   16390     400
  -3  -2  -3    9454     340
  -3  -2  -3    9849     400
   3   2   3    9714     410
   3   2   3    9963     340
   3   2   3    9735     400
  -4  -2  -3   23402     790
   4   2   3   23471     790
   4   2   3   22068     870
   4   2   3   23076     890
   5   2   3   20900     810
   5   2   3   20761     840
   6   2   3   12800     600
   6   2   3   12680     610
   7   2   3   23354     990
   7   2   3   23674     950
   7   2   3   23154     960
   8   2   3    6494     540
   8   2   3    6385     490
   8   2   3    6336     510
   8   2   3    6118     520
   9   2   3      15     250
   9   2   3      15     280
   9   2   3      15     280
   9   2   3     135     300
  10   2   3     595     350
  10   2   3     401     360
  10   2   3     707     360
  10   2   3     679     330
  11   2   3    1427     420
  11   2   3    1633     440
  11   2   3    2095     460
  11   2   3    1756     410
  11  -3  -3     765     450
  11  -3  -3      14     340
  10  -3  -3    2006     490
  10  -3  -3     984     380
   9  -3  -3    4165     450
   9  -3  -3    3701     500
   9  -3  -3    4054     310
   9  -3  -3    4286     350
   8  -3  -3    1701     210
   8  -3  -3    1475     380
   8  -3  -3    1916     340
   7  -3  -3       0     280
   7  -3  -3       0     160
   7  -3  -3      40     150
   7  -3  -3     189     180
   7  -3  -3     259     260
   6  -3  -3    3244     360
   6  -3  -3    3154     280
   6  -3  -3    2902     300
   6  -3  -3    3416     410
   6  -3  -3    3010     290
   5  -3  -3      80     210
   5  -3  -3     453     130
   5  -3  -3     270     140
   5  -3  -3     136     200
   5  -3  -3      80     140
   4  -3  -3    1030     260
   4  -3  -3     751     250
   4  -3  -3     909     210
   4  -3  -3     889     180
  -4   3   3    1322     220
  -4   3   3     949     250
   3  -3  -3     131     130
   3  -3  -3     218     100
   3  -3  -3      98     140
   3  -3  -3     218     150
  -3   3   3     218     130
  -3   3   3     117     120
   2  -3  -3    1883     200
   2  -3  -3    1848     210
   2  -3  -3    1478     200
   2  -3  -3    1839     170
  -2   3   3    1540     190
  -2   3   3    1742     160
   1  -3  -3    8763     340
   1  -3  -3    9278     380
   1  -3  -3    8835     370
   1  -3  -3    8856     380
   1  -3  -3    8536     390
  -1   3   3    9402     390
  -1   3   3    9381     370
  -1   3   3    8959     350
  -1   3   3    8370     360
  -1  -3  -3    8938     360
  -1  -3  -3    8824     360
  -1  -3  -3    8266     360
  -1  -3  -3    9083     380
   1   3   3    8535     370
   1   3   3    8462     360
   1   3   3    8545     360
   1   3   3    8783     390
  -2  -3  -3    1677     190
  -2  -3  -3    1730     170
   2   3   3    1924     190
   2   3   3    2031     220
   2   3   3    1589     200
  -3  -3  -3      75     140
  -3  -3  -3      77     140
  -3  -3  -3     105      90
   3   3   3     115     100
   3   3   3      86     160
   3   3   3      86     140
  -4  -3  -3    1304     250
  -4  -3  -3    1220     170
   4   3   3    1035     240
   4   3   3    1041     170
   4   3   3    1137     250
  -5  -3  -3     572      80
  -5  -3  -3      81      40
   5   3   3     271     200
   5   3   3     699     200
   6   3   3    3606     380
   6   3   3    4271     390
   7   3   3      82     260
   7   3   3     123     240
   8   3   3    1282     330
   8   3   3    1877     340
   8   3   3    1823     340
   8   3   3    1748     350
   9   3   3    4118     470
   9   3   3    3524     440
   9   3   3    3575     460
   9   3   3    3655     450
  10   3   3     804     350
  10   3   3     939     380
  10   3   3    1047     400
  10   3   3    1092     390
  11   3   3     469     390
  11   3   3      83     370
  11   3   3      14     330
  11   3   3     113     350
  10  -4  -3     462     400
  10  -4  -3    1043     230
  10  -4  -3    1014     390
   9  -4  -3    7641     470
   9  -4  -3    9545     770
   9  -4  -3    8028     630
   8  -4  -3    8367     680
   8  -4  -3    7917     470
   8  -4  -3    7297     580
   7  -4  -3   10431     700
   7  -4  -3    9461     600
   7  -4  -3   10981     540
   7  -4  -3   10859     520
   7  -4  -3   11073     490
   6  -4  -3   21592     890
   6  -4  -3   20771     930
   6  -4  -3   21428     900
   6  -4  -3   19688    1000
   6  -4  -3   22367     820
   5  -4  -3    6361     360
   5  -4  -3    7018     450
   5  -4  -3    5790     280
   5  -4  -3    5669     350
   5  -4  -3    6141     390
   4  -4  -3   33712    1270
   4  -4  -3   34342    1190
   4  -4  -3   33190    1350
   4  -4  -3   36366    1310
   4  -4  -3   32967    1300
   3  -4  -3   96656    2840
   3  -4  -3   94423    3040
   3  -4  -3   94638    3080
   3  -4  -3   94270    2890
  -3   4   3   93153    2840
  -3   4   3   97352    3040
  -3   4   3   97618    2890
  -2   4   3   47737    1730
   1  -4  -3   10599     340
   1  -4  -3    9847     280
   1  -4  -3   10159     300
   1  -4  -3    9677     340
  -1   4   3   10431     300
  -1   4   3    9493     290
  -1   4   3    9925     340
  -1   4   3   10418     370
   0  -4  -3    5631     470
   0  -4  -3    5864     460
   0  -4  -3    5850     500
   0   4   3    6494     480
   0   4   3    6007     510
   0   4   3    6192     530
   0   4   3    5907     460
   0   4   3    6429     450
  -1  -4  -3   10149     320
  -1  -4  -3   10149     330
  -1  -4  -3    9038     310
  -1  -4  -3    9890     330
   1   4   3   10227     320
   1   4   3    9877     330
   1   4   3   10614     330
   1   4   3   10782     350
  -2  -4  -3  102129    3420
  -2  -4  -3   96416    3550
   2   4   3  103611    3390
   2   4   3  102138    3560
   2   4   3   99521    3610
   2   4   3   97405    3410
  -3  -4  -3   92705    3000
  -3  -4  -3   96762    2920
  -3  -4  -3   95144    3070
   3   4   3   98144    3010
   3   4   3   94775    3070
   3   4   3   96291    2920
  -4  -4  -3   34620    1270
  -4  -4  -3   34872    1270
  -4  -4  -3   35869    1360
   4   4   3   35540    1370
   4   4   3   34446    1280
   4   4   3   34233    1300
  -5  -4  -3    6221     260
  -5  -4  -3    6287     260
   5   4   3    6529     410
   5   4   3    6660     410
  -6  -4  -3   21732     770
  -6  -4  -3   20621     760
   6   4   3   21172     960
   6   4   3   21404     940
   7   4   3   10115     620
   7   4   3    9911     620
   8   4   3    7882     570
   8   4   3    9110     620
   8   4   3    7772     600
   9   4   3    7911     620
   9   4   3    8328     670
   9   4   3    8547     630
   9   4   3    8745     640
  10   4   3     647     360
  10   4   3     393     350
  10   4   3    1201     390
  10   4   3    1259     410
  10  -5  -3     825     240
  10  -5  -3     883     410
  10  -5  -3    1100     400
   9  -5  -3     333     350
   9  -5  -3     191     370
   9  -5  -3     380     240
   8  -5  -3     271     220
   8  -5  -3     162     310
   8  -5  -3     674     360
   7  -5  -3     111     220
   7  -5  -3     127     310
   7  -5  -3     178     280
   6  -5  -3    2379     370
   6  -5  -3    1673     270
   6  -5  -3    1777     270
   6  -5  -3    1328     190
   6  -5  -3    2057     340
   5  -5  -3      32     130
   5  -5  -3      32     190
   5  -5  -3      32     220
   5  -5  -3      32     220
   5  -5  -3      32     200
   4  -5  -3      25     180
   4  -5  -3      31     120
   4  -5  -3     174     210
   4  -5  -3      84     200
   4  -5  -3      25     200
   3  -5  -3     190     180
   3  -5  -3      56     120
   3  -5  -3     190     180
   3  -5  -3     170     190
  -3   5   3      24     130
   2  -5  -3     325     170
   2  -5  -3     293     190
   2  -5  -3     583     130
   2  -5  -3      49      80
   2  -5  -3     470     150
  -2   5   3     293     140
  -2   5   3     521     180
  -2   5   3     178     110
   1  -5  -3    4541     270
   1  -5  -3    4312     310
   1  -5  -3    3873     330
   1  -5  -3    4232     260
   1  -5  -3    4282     320
  -1   5   3    4940     370
  -1   5   3    4262     320
  -1   5   3    4192     280
  -1   5   3    4282     300
  -1   5   3    4391     270
  -1  -5  -3    4402     300
  -1  -5  -3    4322     320
  -1  -5  -3    4422     320
  -1  -5  -3    4492     330
   1   5   3    5060     310
   1   5   3    4671     320
   1   5   3    4522     210
   1   5   3    4212     350
   1   5   3    4082     320
  -2  -5  -3     363     160
  -2  -5  -3     445     180
  -2  -5  -3     321     170
   2   5   3     425     170
   2   5   3     394     160
   2   5   3     301     190
   2   5   3     579     200
  -3  -5  -3     314     170
  -3  -5  -3     232     150
   3   5   3     314     170
   3   5   3      98     150
   3   5   3     508     200
   3   5   3       0     170
  -4  -5  -3       5     130
   4   5   3      25     200
   4   5   3      12     220
   4   5   3      25     140
  -5  -5  -3      31     130
   5   5   3     848     270
   5   5   3      31     220
  -6  -5  -3    1590     160
   6   5   3    1705     350
   6   5   3    1611     320
   7   5   3     104     310
   7   5   3      57     280
   7   5   3       9     220
   8   5   3     250     310
   8   5   3       5     260
   8   5   3     400     330
   9   5   3       1     330
   9   5   3      36     300
   9   5   3     645     370
  10   5   3     641     400
  10   5   3      17     380
  10   5   3     333     330
  10   5   3     759     380
  10  -6  -3     294     420
  10  -6  -3      10     250
  10  -6  -3     310     400
   9  -6  -3     372     260
   9  -6  -3       4     370
   9  -6  -3     372     370
   8  -6  -3    2917     490
   8  -6  -3    2818     370
   8  -6  -3    3182     460
   7  -6  -3    1996     390
   7  -6  -3    1148     280
   7  -6  -3    1840     370
   6  -6  -3    2283     390
   6  -6  -3    2235     330
   6  -6  -3    2825     220
   6  -6  -3    2368     370
   6  -6  -3    2330     350
   5  -6  -3   14385     700
   5  -6  -3   15585     750
   5  -6  -3   15337     530
   5  -6  -3   15130     700
   5  -6  -3   15171     710
   4  -6  -3    5064     290
   4  -6  -3    4498     430
   4  -6  -3    5841     460
   4  -6  -3    5679     450
   4  -6  -3    4771     420
  -4   6   3    5310     310
   3  -6  -3   23358     900
   3  -6  -3   22278     900
   3  -6  -3   22818     770
   3  -6  -3   22971     880
   3  -6  -3   23511     910
  -3   6   3   22604     780
   2  -6  -3   42901    1680
   2  -6  -3   44701    1560
   2  -6  -3   46229    1720
   2  -6  -3   46823    1640
   2  -6  -3   48244    1730
  -2   6   3   45304    1570
   1  -6  -3   22292     880
   1  -6  -3   23988     820
   1  -6  -3   25027     850
   1  -6  -3   24092     780
  -1   6   3   24185     910
  -1   6   3   23322     880
  -1   6   3   22521     790
   0  -6  -3    1430     250
   0  -6  -3    1495     210
   0  -6  -3    1504     250
   0   6   3    1653     160
   0   6   3    1981     260
   0   6   3    1374     220
   0   6   3    1551     280
  -1  -6  -3   23656     810
  -1  -6  -3   21616     820
  -1  -6  -3   22949     850
   1   6   3   23594     740
   1   6   3   23708     890
   1   6   3   23365     850
   1   6   3   22730     810
  -2  -6  -3   44206    1670
   2   6   3   44012    1720
   2   6   3   47880    1690
   2   6   3   45687    1630
  -3  -6  -3   23105     870
   3   6   3   23981     900
   3   6   3   23207     880
   3   6   3   23503     950
  -4  -6  -3    5240     370
   4   6   3    4985     440
   4   6   3    5922     490
  -5  -6  -3   14439     590
   5   6   3   15141     730
   5   6   3   15441     740
  -6  -6  -3    2529     240
   6   6   3    1999     390
   6   6   3    2169     380
   6   6   3    2538     290
   7   6   3    1207     330
   7   6   3    1699     270
   7   6   3    1939     370
   8   6   3    2395     440
   8   6   3    2907     370
   8   6   3    2750     460
   9   6   3     450     380
   9   6   3     765     410
   9   6   3       4     280
  10   6   3     279     360
  10   6   3      10     390
  10   6   3      10     400
   9  -7  -3    5682     620
   9  -7  -3    5464     510
   9  -7  -3    5415     650
   8  -7  -3    4338     540
   8  -7  -3    4942     470
   8  -7  -3    5373     560
   7  -7  -3    8553     660
   7  -7  -3    7500     600
   7  -7  -3    7915     680
   6  -7  -3    4070     440
   6  -7  -3    4137     400
   6  -7  -3    4439     400
   5  -7  -3    8027     390
   5  -7  -3    7598     600
   5  -7  -3    8265     600
   5  -7  -3    7712     590
   4  -7  -3    3059     350
   4  -7  -3    3525     380
   4  -7  -3    3133     340
   4  -7  -3    3250     220
  -4   7   3    3990     280
   3  -7  -3    2828     320
   3  -7  -3    2939     260
   3  -7  -3    2958     360
   3  -7  -3    3536     390
  -3   7   3    2689     260
   2  -7  -3    4213     310
   2  -7  -3    4192     360
   2  -7  -3    4938     300
   2  -7  -3    4876     400
  -2   7   3    4866     330
   1  -7  -3    2636     250
   1  -7  -3    1695     290
   1  -7  -3    2074     280
   1  -7  -3    2579     240
  -1   7   3    2560     350
  -1   7   3    2732     260
  -1  -7  -3    2925     330
  -1  -7  -3    2486     320
   1   7   3    2087     280
   1   7   3    3193     330
   1   7   3    2477     340
  -2  -7  -3    4651     350
  -2  -7  -3    4817     370
   2   7   3    5117     390
   2   7   3    5385     390
   2   7   3    5065     420
  -3  -7  -3    2881     320
   3   7   3    2444     340
   3   7   3    3460     400
   3   7   3    3068     320
  -4  -7  -3    3981     320
   4   7   3    3643     360
   4   7   3    3273     390
  -5  -7  -3    7849     480
   5   7   3    7859     620
   5   7   3    7420     630
   5   7   3    7887     410
   6   7   3    4855     470
   6   7   3    4744     460
   6   7   3    4365     290
   7   7   3    7571     490
   7   7   3    7629     640
   7   7   3    5948     620
   8   7   3    5425     580
   8   7   3    5234     570
   9   7   3    5243     620
   9   7   3    5739     620
   9  -8  -3     127     420
   9  -8  -3      64     320
   9  -8  -3     484     390
   8  -8  -3     388     370
   8  -8  -3     215     330
   8  -8  -3     553     390
   7  -8  -3     670     360
   7  -8  -3     969     380
   7  -8  -3     433     320
   6  -8  -3     528     360
   6  -8  -3     498     330
   6  -8  -3     622     350
   5  -8  -3      31     280
   5  -8  -3      31     270
   5  -8  -3      70     270
   4  -8  -3    3312     260
   4  -8  -3    3722     450
   4  -8  -3    3263     430
   4  -8  -3    4415     430
  -4   8   3    3605     280
   3  -8  -3    1644     340
   3  -8  -3    1987     340
   3  -8  -3    1644     220
   3  -8  -3    1425     290
  -3   8   3    1873     250
   2  -8  -3      65     190
   2  -8  -3     821     270
   2  -8  -3      14     230
   2  -8  -3     520     180
  -2   8   3     351     200
   1  -8  -3    7146     410
   1  -8  -3    7554     390
   1  -8  -3    8598     530
   1  -8  -3    8108     490
  -1   8   3    8285     580
  -1   8   3    7031     440
   0  -8  -3   28705    1170
   0  -8  -3   30297    1220
   0   8   3   28940    1130
   0   8   3   29057    1260
  -1  -8  -3    7118     500
  -1  -8  -3    7192     500
   1   8   3    7495     480
   1   8   3    7181     550
  -2  -8  -3      14     270
  -2  -8  -3     130     240
   2   8   3      14     290
   2   8   3     826     280
  -3  -8  -3    2305     330
   3   8   3    1473     360
   3   8   3    1540     350
  -4  -8  -3    4267     390
   4   8   3    4022     470
   4   8   3    4061     490
  -5  -8  -3     128     220
   5   8   3      69     340
   5   8   3      13     330
   6   8   3     613     400
   6   8   3     398     390
   7   8   3     945     410
   7   8   3     756     400
   8   8   3     833     410
   8   8   3     380     430
   9   8   3      59     430
   9   8   3     393     480
   8  -9  -3    4124     560
   8  -9  -3    5263     600
   8  -9  -3    3961     500
   7  -9  -3    6419     590
   7  -9  -3    5038     550
   7  -9  -3    5906     600
   6  -9  -3   16273     880
   6  -9  -3   14880     860
   6  -9  -3   15220     870
   5  -9  -3    7968     660
   5  -9  -3    6760     580
   5  -9  -3    8651     660
   4  -9  -3    3924     440
   4  -9  -3    3977     400
   4  -9  -3    3599     450
  -4   9   3    3798     290
   3  -9  -3    4278     410
   3  -9  -3    3636     470
   3  -9  -3    4184     490
   3  -9  -3    3909     340
  -3   9   3    4013     350
   2  -9  -3    6357     500
   2  -9  -3    5776     380
   2  -9  -3    4920     430
  -2   9   3    6497     430
   1  -9  -3    3609     430
   1  -9  -3    3355     450
   1  -9  -3    3430     300
  -1   9   3    3252     490
  -1   9   3    2068     320
  -1  -9  -3    3694     420
  -1  -9  -3    2934     420
   1   9   3    2860     460
   1   9   3    2673     360
  -2  -9  -3    5979     440
  -2  -9  -3    5839     480
   2   9   3    5871     540
   2   9   3    6335     470
  -3  -9  -3    3195     400
   3   9   3    4156     480
   3   9   3    3684     510
  -4  -9  -3    4259     390
   4   9   3    3756     460
   4   9   3    3955     490
   5   9   3    8427     730
   5   9   3    9140     730
   6   9   3   18429     970
   6   9   3   15248    1000
   7   9   3    5945     690
   7   9   3    7613     700
   8   9   3    5089     650
   8   9   3    4580     640
   8 -10  -3     349     390
   7 -10  -3     745     440
   7 -10  -3     428     410
   7 -10  -3     428     390
   6 -10  -3    1137     400
   6 -10  -3     574     360
   6 -10  -3     646     410
   5 -10  -3    1219     410
   5 -10  -3     320     340
   5 -10  -3     635     390
   4 -10  -3    2791     440
   4 -10  -3    2926     400
   4 -10  -3    3585     500
   3 -10  -3     360     360
   3 -10  -3     506     370
   3 -10  -3       9     240
  -3  10   3     199     250
   2 -10  -3    1592     280
   2 -10  -3    2702     430
   2 -10  -3    2418     400
  -2  10   3    2218     310
   1 -10  -3    3433     450
   1 -10  -3    3316     460
  -1  10   3    1977     480
  -1  10   3    2325     370
   0 -10  -3    2076     420
   0 -10  -3    2180     440
   0  10   3    1528     350
   0  10   3    1575     480
  -1 -10  -3    2681     410
  -1 -10  -3    2062     430
   1  10   3    2982     500
   1  10   3    2294     380
  -2 -10  -3    2448     370
  -2 -10  -3    1513     390
   2  10   3    1567     430
   2  10   3    1929     370
  -3 -10  -3     198     300
   3  10   3     146     320
   3  10   3     542     410
  -4 -10  -3    3192     400
   4  10   3    2555     530
   4  10   3    2449     450
   5  10   3     524     420
   5  10   3     479     450
   6  10   3     616     410
   6  10   3    1058     480
   7  10   3     421     490
   7  10   3     946     490
   7 -11  -3    1434     530
   7 -11  -3    2608     530
   7 -11  -3    2006     490
   6 -11  -3     492     360
   6 -11  -3      71     400
   6 -11  -3       9     390
   5 -11  -3    1990     420
   5 -11  -3    1689     480
   5 -11  -3    1849     450
   4 -11  -3    3497     440
   4 -11  -3    4355     540
   4 -11  -3    4325     530
   3 -11  -3    1968     450
   3 -11  -3    2324     360
   3 -11  -3    2208     480
  -3  11   3    2517     350
   2 -11  -3       4     370
   2 -11  -3       4     220
   2 -11  -3       4     350
  -2  11   3       4     250
   1 -11  -3       6     350
   1 -11  -3     230     360
  -1  11   3     451     300
  -1  11   3     278     430
  -1 -11  -3       6     320
  -1 -11  -3       6     340
   1  11   3     311     320
   1  11   3     241     430
  -2 -11  -3      26     330
  -2 -11  -3       4     350
   2  11   3     201     340
   2  11   3      85     430
  -3 -11  -3    2487     420
   3  11   3    2150     520
   3  11   3    1641     420
   4  11   3    4607     630
   4  11   3    4658     550
   5  11   3    1590     560
   5  11   3    1506     500
   6  11   3     616     520
   6  11   3       9     450
   7  11   3    2213     570
   7  11   3     717     590
   5 -12  -3     225     350
   5 -12  -3     586     460
   5 -12  -3    1216     470
   4 -12  -3    1080     420
   4 -12  -3    2245     510
   4 -12  -3    1837     400
   3 -12  -3    9902     810
   3 -12  -3   12433     900
   2 -12  -3    4785     600
   2 -12  -3    3633     550
  -2  12   3    4235     450
   1 -12  -3    8665     700
   1 -12  -3    8885     730
  -1  12   3    8715     620
  -1  12   3    7733     770
   0 -12  -3   18641     980
   0 -12  -3   15452     950
   0  12   3   14705     970
   0  12   3   15402     850
  -1 -12  -3    8955     740
  -1 -12  -3    9437     750
   1  12   3    8895     660
   1  12   3    7381     750
  -2 -12  -3    4381     510
   2  12   3    3902     520
   2  12   3    3434     610
   3  12   3    9628     870
   3  12   3    8339     700
   4  12   3    2735     540
   4  12   3    2785     620
   5  12   3    1437     520
   5  12   3     884     570
   4 -13  -3    1050     510
   4 -13  -3       1     400
   3 -13  -3      21     450
   3 -13  -3     847     450
   2 -13  -3      17     450
   2 -13  -3     123     460
   1 -13  -3     513     430
   1 -13  -3       0     410
  -1  13   3       0     360
  -1  13   3      79     520
  -1 -13  -3       0     410
  -1 -13  -3     159     450
   1  13   3       0     380
   1  13   3     168     500
  -2 -13  -3      56     390
   2  13   3     111     410
   2  13   3      16     520
   3  13   3      21     420
   3  13   3      21     510
   4  13   3     216     590
   4  13   3     187     470
   1 -14  -3    6363     740
   0 -14  -3    2679     560
   0 -14  -3    2050     560
   0  14   3    1815     620
  -1 -14  -3    5454     660
   1  14   3    3711     560
   1  14   3    5238     790
  -1 -14   4    1490     510
   0  14  -4    1588     620
   0 -14   4    1165     520
   0 -14   4    2203     540
  -1  14  -4    1839     670
   1 -14   4    1508     520
   4  13  -4    1276     620
   4  13  -4    1497     500
   3  13  -4    1434     500
   3  13  -4     728     600
   2  13  -4     285     410
   2  13  -4    1000     570
  -2 -13   4    1131     460
  -2 -13   4     688     440
   1  13  -4       3     520
   1  13  -4      53     360
  -1 -13   4     343     420
  -1 -13   4       3     420
  -1  13  -4       3     510
   1 -13   4     401     450
   1 -13   4     379     430
  -2  13  -4     756     570
   2 -13   4     816     450
   2 -13   4     686     470
   3 -13   4     633     440
   3 -13   4     236     460
   4 -13   4    2438     560
   4 -13   4    1423     530
   5  12  -4     891     570
   5  12  -4     325     500
   4  12  -4    1479     570
   4  12  -4    1874     510
   3  12  -4    2659     500
   3  12  -4    1985     600
   2  12  -4    4094     640
   2  12  -4    4676     530
  -2 -12   4    6485     610
  -2 -12   4    6169     600
   1  12  -4    5181     520
   1  12  -4    6659     730
  -1 -12   4    6969     620
  -1 -12   4    5791     580
   0  12  -4    3099     560
   0  12  -4    3118     430
   0 -12   4    3564     530
   0 -12   4    3370     510
  -1  12  -4    5824     480
  -1  12  -4    5906     690
   1 -12   4    5318     570
   1 -12   4    6980     650
  -2  12  -4    4896     660
   2 -12   4    6270     670
   2 -12   4    5874     620
   3 -12   4    2751     520
   3 -12   4    2008     510
   4 -12   4    1136     470
   4 -12   4    1600     500
   5 -12   4     244     340
   5 -12   4     181     420
   5 -12   4     763     450
   7  11  -4    2442     650
   7  11  -4    2872     620
   6  11  -4     755     510
   6  11  -4    1343     490
   5  11  -4     390     450
   5  11  -4     761     490
   4  11  -4    1895     560
   4  11  -4    2465     490
   3  11  -4    2700     560
   3  11  -4    3545     490
  -3 -11   4    3453     450
   2  11  -4     799     430
   2  11  -4    1768     390
  -2 -11   4    1871     400
  -2 -11   4    1467     390
   1  11  -4    2163     390
   1  11  -4    2350     530
  -1 -11   4    2281     430
  -1 -11   4    3022     460
  -1  11  -4    2191     330
  -1  11  -4    1904     500
   1 -11   4    2627     470
   1 -11   4    1924     430
  -2  11  -4     789     270
  -2  11  -4    1475     480
   2 -11   4     967     400
   2 -11   4    1185     250
   2 -11   4    1382     390
   3 -11   4    3103     480
   3 -11   4    2824     350
   3 -11   4    3206     470
   4 -11   4    2859     500
   4 -11   4    1610     370
   4 -11   4    1708     460
   5 -11   4     881     400
   5 -11   4    1016     440
   5 -11   4      62     320
   6 -11   4    1648     410
   6 -11   4    1178     440
   6 -11   4    1589     490
   7 -11   4    2195     480
   7 -11   4    2727     520
   7 -11   4    2451     550
   7  10  -4      41     460
   7  10  -4     693     510
   6  10  -4    2294     540
   6  10  -4    1413     490
   5  10  -4   10428     870
   5  10  -4   11578     820
   4  10  -4   15869     970
   4  10  -4   16871     890
  -4 -10   4   15187     800
   3  10  -4   23222    1000
   3  10  -4   19257    1100
  -3 -10   4   22605     980
   2  10  -4   31486    1280
   2  10  -4   30874    1420
  -2 -10   4   29424    1260
  -2 -10   4   31722    1310
   1  10  -4   38346    1580
   1  10  -4   42060    1440
  -1 -10   4   42499    1550
  -1 -10   4   39144    1470
   0  10  -4   60247    2110
   0  10  -4   56223    2340
   0 -10   4   55514    2140
   0 -10   4   60549    2270
  -1  10  -4   39134    1370
  -1  10  -4   41038    1620
   1 -10   4   42153    1560
   1 -10   4   39164    1380
   1 -10   4   40608    1470
  -2  10  -4   30198    1110
  -2  10  -4   27091    1310
   2 -10   4   30169    1240
   2 -10   4   29784    1310
   2 -10   4   28965    1140
  -3  10  -4   21698     820
   3 -10   4   20626     980
   3 -10   4   23680    1070
   3 -10   4   21729     920
   4 -10   4   16389     830
   4 -10   4   16589     900
   4 -10   4   17580     950
   5 -10   4   12317     830
   5 -10   4   11603     790
   5 -10   4   11018     730
   6 -10   4    2486     450
   6 -10   4    2731     490
   6 -10   4    1865     420
   7 -10   4     856     420
   7 -10   4    1013     410
   7 -10   4     631     440
   8   9  -4     540     510
   8   9  -4     367     460
   7   9  -4       0     410
   7   9  -4       0     430
   6   9  -4     402     410
   6   9  -4    1503     430
   5   9  -4     364     380
   5   9  -4     827     430
   4   9  -4      24     330
   4   9  -4      24     360
  -4  -9   4      24     250
   3   9  -4    1236     410
   3   9  -4    1081     350
  -3  -9   4    1117     300
   2   9  -4     804     290
   2   9  -4     159     340
  -2  -9   4     742     300
  -2  -9   4     660     300
   1   9  -4     428     360
   1   9  -4       0     240
  -1  -9   4     274     290
  -1  -9   4     672     300
  -1   9  -4     147     210
  -1   9  -4     157     360
   1  -9   4      23     290
   1  -9   4     279     170
   1  -9   4       0     290
  -2   9  -4     731     200
  -2   9  -4     254     370
   2  -9   4     442     330
   2  -9   4       1     260
   2  -9   4     338     210
  -3   9  -4     851     200
   3  -9   4    1527     400
   3  -9   4    1059     330
   3  -9   4    1168     280
   4  -9   4     116     270
   4  -9   4     201     330
   4  -9   4     216     320
   5  -9   4     510     330
   5  -9   4     104     280
   5  -9   4     210     340
   6  -9   4     512     360
   6  -9   4     755     370
   6  -9   4     130     330
   7  -9   4       0     340
   7  -9   4      91     380
   7  -9   4      40     330
   8  -9   4     357     340
   8  -9   4     385     410
   8  -9   4       1     330
   9   8  -4     101     440
   9   8  -4     478     510
   8   8  -4     717     450
   8   8  -4      14     420
   7   8  -4    8880     780
   7   8  -4   10359     800
   6   8  -4   15637     930
   6   8  -4   17125     910
   5   8  -4    6727     560
   5   8  -4    5984     560
  -5  -8   4    6341     440
   4   8  -4   15564     850
   4   8  -4   16963     930
  -4  -8   4   16098     770
   3   8  -4   25464    1120
   3   8  -4   29981    1050
  -3  -8   4   28582    1030
   2   8  -4   35989    1440
   2   8  -4   31662    1570
  -2  -8   4   33547    1490
  -2  -8   4   34118    1430
   1   8  -4   46777    1570
   1   8  -4   51582    1450
  -1  -8   4   50983    1460
  -1  -8   4   53499    1550
   0   8  -4   52296    2120
   0   8  -4   51474    2320
   0  -8   4   53272    2160
   0  -8   4   54602    2280
   0  -8   4   51384    2150
  -1   8  -4   53183    1430
  -1   8  -4   50078    1630
   1  -8   4   54710    1600
   1  -8   4   51033    1500
   1  -8   4   50700    1480
  -2   8  -4   34699    1320
  -2   8  -4   31821    1540
   2  -8   4   33935    1510
   2  -8   4   32547    1420
   2  -8   4   33126    1430
  -3   8  -4   29203     900
   3  -8   4   30139    1120
   3  -8   4   28045    1050
   3  -8   4   28908    1060
   4  -8   4   16743     840
   4  -8   4   15723     830
   4  -8   4   16558     870
   5  -8   4    6911     530
   5  -8   4    5964     510
   5  -8   4    6545     540
   6  -8   4   16113     860
   6  -8   4   16802     870
   6  -8   4   15503     890
   7  -8   4   11200     750
   7  -8   4    9494     690
   7  -8   4    9014     730
   8  -8   4      12     350
   8  -8   4     578     400
   8  -8   4     342     310
   9  -8   4     396     410
   9  -8   4      60     320
   9  -8   4     600     430
   9   7  -4     437     440
   9   7  -4     437     460
   8   7  -4     222     380
   8   7  -4      57     390
   7   7  -4    6126     420
   7   7  -4    5350     590
   7   7  -4    6397     600
   6   7  -4    9629     640
   6   7  -4    9049     410
   6   7  -4    8004     600
   5   7  -4    8618     700
   5   7  -4    7952     660
  -5  -7   4    8810     520
   4   7  -4   12052     610
   4   7  -4   10762     640
  -4  -7   4   12217     520
   3   7  -4     698     290
   3   7  -4     646     300
  -3  -7   4     865     250
   2   7  -4     127     240
   2   7  -4     127     230
  -2  -7   4     186     220
  -2  -7   4      90     210
   1   7  -4     505     270
   1   7  -4     825     220
  -1  -7   4     851     230
  -1  -7   4     685     250
  -1   7  -4     586     290
  -1   7  -4     751     180
   1  -7   4     760     170
   1  -7   4     612     240
   1  -7   4    1177     280
  -2   7  -4      26     130
  -2   7  -4      96     270
   2  -7   4       7     230
   2  -7   4     141     230
   2  -7   4       5     170
  -3   7  -4    1016     150
   3  -7   4     561     280
   3  -7   4     664     260
   3  -7   4     953     290
   4  -7   4   10779     580
   4  -7   4   11254     580
   4  -7   4   11551     590
   5  -7   4    8404     630
   5  -7   4    9016     640
   5  -7   4    7185     630
   6  -7   4    9076     560
   6  -7   4    9463     600
   6  -7   4    8031     580
   7  -7   4    6408     580
   7  -7   4    7254     570
   7  -7   4    5865     590
   8  -7   4     290     360
   8  -7   4      10     370
   8  -7   4     102     280
   9  -7   4     521     400
   9  -7   4     691     420
   9  -7   4     754     290
  10   6  -4    1058     490
  10   6  -4    1456     390
  10   6  -4    1104     470
   9   6  -4    3068     410
   9   6  -4    2255     490
   9   6  -4    2719     510
   8   6  -4    4799     420
   8   6  -4    4195     530
   8   6  -4    4403     550
   7   6  -4     234     220
   7   6  -4      23     320
   7   6  -4     269     340
   6   6  -4     235     320
   6   6  -4     227     190
   6   6  -4      33     320
  -6  -6   4      35     150
   5   6  -4   14927     740
   5   6  -4   16008     720
   5   6  -4   15165     550
  -5  -6   4   16547     580
   4   6  -4   14778     800
   4   6  -4   13670     830
  -4  -6   4   14697     720
   3   6  -4   25303     840
   3   6  -4   26457     780
   3   6  -4   23740     870
  -3  -6   4   26838     810
   2   6  -4   25222    1220
   2   6  -4   25312    1130
   2   6  -4   27289    1090
  -2  -6   4   25204    1150
  -2  -6   4   25466    1100
   1   6  -4     852     160
   1   6  -4     660     190
   1   6  -4    1006     240
  -1  -6   4     452     170
  -1  -6   4     823     200
   0   6  -4     168     150
   0   6  -4      20     210
   0   6  -4     357     160
   0  -6   4      20     180
   0  -6   4     155     100
   0  -6   4      20     180
  -1   6  -4     946     180
  -1   6  -4     861     140
  -1   6  -4     686     210
   1  -6   4     359     140
   1  -6   4     745     200
   1  -6   4    1271     210
  -2   6  -4   25891    1030
  -2   6  -4   24741    1210
   2  -6   4   26953    1200
   2  -6   4   25973    1130
   2  -6   4   25828    1200
  -3   6  -4   25519     690
   3  -6   4   25799     840
   3  -6   4   27969     880
   3  -6   4   26807     880
   4  -6   4   15292     810
   4  -6   4   13393     810
   4  -6   4   15591     820
   4  -6   4   16296     820
   5  -6   4   16943     700
   5  -6   4   15143     680
   5  -6   4   18327     710
   5  -6   4   15909     750
   6  -6   4      33     270
   6  -6   4      52     290
   6  -6   4      33     250
   6  -6   4     115     220
   7  -6   4     173     310
   7  -6   4       6     310
   7  -6   4     242     250
   8  -6   4    4197     540
   8  -6   4    4663     430
   8  -6   4    3869     500
   9  -6   4    2837     360
   9  -6   4    2775     480
   9  -6   4    2383     500
  10  -6   4    1392     440
  10  -6   4    1233     500
  10  -6   4    1076     300
  10   5  -4    2150     460
  10   5  -4    1380     380
  10   5  -4    1887     390
  10   5  -4    1796     500
   9   5  -4    7879     720
   9   5  -4   10023     650
   9   5  -4    9318     640
   9   5  -4    9715     740
   8   5  -4   19557     890
   8   5  -4   21802     990
   8   5  -4   19608    1000
   7   5  -4    6188     560
   7   5  -4    5493     450
   7   5  -4    5109     540
   6   5  -4    4809     430
   6   5  -4    5524     450
   6   5  -4    5123     330
  -6  -5   4    4843     250
   5   5  -4    4300     490
   5   5  -4    4138     350
   5   5  -4    4740     470
  -5  -5   4    4723     320
   4   5  -4     486     290
   4   5  -4     480     150
   4   5  -4     320     240
   4   5  -4     326     190
  -4  -5   4     359     170
   3   5  -4    6588     510
   3   5  -4    6328     440
   3   5  -4    5593     530
  -3  -5   4    6409     450
  -3  -5   4    6980     450
   2   5  -4   22042     760
   2   5  -4   23431     660
   2   5  -4   23248     700
  -2  -5   4   23821     700
  -2  -5   4   23099     700
  -2  -5   4   23443     670
  -2  -5   4   23420     750
   1   5  -4    1614     240
   1   5  -4    1302     250
   1   5  -4    1934     260
   1   5  -4    1577     280
  -1  -5   4    1740     240
  -1  -5   4    1621     260
  -1  -5   4    2169     280
  -1   5  -4    1483     270
  -1   5  -4    2026     260
  -1   5  -4    1748     220
  -1   5  -4    2003     300
   1  -5   4    2102     280
   1  -5   4    1622     280
   1  -5   4    1711     260
   1  -5   4    1771     280
  -2   5  -4   23717     690
  -2   5  -4   22100     740
  -2   5  -4   22318     590
   2  -5   4   24608     730
   2  -5   4   24003     740
   2  -5   4   22778     730
   2  -5   4   21858     690
   3  -5   4    5985     480
   3  -5   4    5752     500
   3  -5   4    6154     490
   3  -5   4    6057     500
   4  -5   4     109     190
   4  -5   4     261     230
   4  -5   4     392     240
   5  -5   4    4658     440
   5  -5   4    5616     480
   5  -5   4    4391     440
   6  -5   4    4706     360
   6  -5   4    6212     490
   6  -5   4    4582     400
   6  -5   4    6069     380
   7  -5   4    5572     560
   7  -5   4    5441     470
   7  -5   4    4852     500
   8  -5   4   19168     930
   8  -5   4   19138    1010
   8  -5   4   19422     820
   9  -5   4    9338     720
   9  -5   4    7739     710
   9  -5   4    8712     540
  10  -5   4    1865     440
  10  -5   4    1561     280
  10  -5   4    1349     470
  10   4  -4     186     320
  10   4  -4    1087     320
  10   4  -4    1337     420
  10   4  -4    1122     380
   9   4  -4    2246     470
   9   4  -4    2349     400
   9   4  -4    1583     420
   9   4  -4    2821     410
   8   4  -4      34     250
   8   4  -4     297     300
   8   4  -4      34     250
   8   4  -4     297     310
   7   4  -4    5431     460
   7   4  -4    7236     440
   7   4  -4    7634     490
   6   4  -4     141     220
   6   4  -4     156     270
   6   4  -4     172     280
  -6  -4   4     136      90
   5   4  -4   14461     730
   5   4  -4   13603     670
   5   4  -4   14101     780
  -5  -4   4   14258     600
  -5  -4   4   13539     590
   4   4  -4   12372     430
   4   4  -4   12259     530
   4   4  -4   12474     510
  -4  -4   4   12214     410
  -4  -4   4   12632     400
   3   4  -4   47874    2070
   3   4  -4   53562    2070
   3   4  -4   55189    1990
   3   4  -4   50595    2040
   3   4  -4   52937    2170
  -3  -4   4   57105    2180
  -3  -4   4   51201    2080
  -3  -4   4   52101    2080
   2   4  -4   24673     660
   2   4  -4   24817     660
   2   4  -4   24470     710
   2   4  -4   24769     620
  -2  -4   4   24900     700
  -2  -4   4   24170     660
  -2  -4   4   24840     660
   1   4  -4    2597     350
   1   4  -4    1916     290
   1   4  -4    2079     320
   1   4  -4    1423     320
  -1  -4   4    2245     300
   0   4  -4   26399     650
   0   4  -4   26309     630
   0   4  -4   26785     580
   0   4  -4   25586     570
   0  -4   4   26193     630
   0  -4   4   26450     640
   0  -4   4   26888     580
  -1   4  -4    2109     260
  -1   4  -4    2103     360
  -1   4  -4    1864     340
  -1   4  -4    2317     320
   1  -4   4    2462     340
   1  -4   4    1991     340
   1  -4   4    2015     320
  -2   4  -4   27970     710
  -2   4  -4   27840     750
  -2   4  -4   27497     770
  -2   4  -4   25857     620
   2  -4   4   27934     760
   2  -4   4   26571     760
   2  -4   4   27520     720
   2  -4   4   27153     760
  -3   4  -4   56417    2110
  -3   4  -4   53455    2200
   3  -4   4   53878    2200
   3  -4   4   56869    2230
   3  -4   4   54310    2100
   3  -4   4   53951    2200
   4  -4   4   15094     560
   4  -4   4   14389     580
   4  -4   4   14031     540
   4  -4   4   15183     540
   5  -4   4   13693     730
   5  -4   4   14403     700
   5  -4   4   14689     710
   6  -4   4     476     280
   6  -4   4     138     210
   6  -4   4     318     210
   7  -4   4    7143     270
   7  -4   4    7802     510
   7  -4   4    7450     410
   7  -4   4    7439     280
   7  -4   4    7006     390
   7  -4   4    6435     500
   8  -4   4     127     190
   8  -4   4     354     270
   8  -4   4      34     300
   9  -4   4    1731     260
   9  -4   4    1992     440
   9  -4   4    2404     450
  10  -4   4     652     400
  10  -4   4     795     220
  10  -4   4    1607     430
  11   3  -4    5504     580
  11   3  -4    5584     650
  11   3  -4    5146     590
  11   3  -4    5166     570
  10   3  -4    7082     670
  10   3  -4    8727     660
  10   3  -4    7205     630
  10   3  -4    7716     580
   9   3  -4    5675     540
   9   3  -4    4638     480
   9   3  -4    5204     580
   9   3  -4    4715     510
   8   3  -4    1084     320
   8   3  -4     431     280
   8   3  -4    1235     280
   8   3  -4     910     320
   7   3  -4    9181     620
   7   3  -4    7418     550
   7   3  -4    7839     530
   7   3  -4    8593     590
   6   3  -4   10866     580
   6   3  -4   11942     630
   6   3  -4   11789     580
   5   3  -4   16280     740
   5   3  -4   16963     670
  -5  -3   4   15924     540
  -5  -3   4   13689     540
   4   3  -4   34800    1320
   4   3  -4   34938    1250
  -4  -3   4   34415    1190
   3   3  -4    4590     320
   3   3  -4    4601     220
   3   3  -4    4105     220
  -3  -3   4    4300     210
  -3  -3   4    4192     220
  -3  -3   4    4300     300
   2   3  -4    1302     100
   2   3  -4     829     160
   2   3  -4    1217     130
   2   3  -4    1260     140
  -2  -3   4    1281     140
  -2  -3   4    1217     100
   1   3  -4       0      90
   1   3  -4     430     150
   1   3  -4     470     130
  -1  -3   4     207     110
  -1  -3   4     278     110
  -1   3  -4     735     160
  -1   3  -4     313      80
  -1   3  -4     364     130
  -1   3  -4     334     140
   1  -3   4     152     130
   1  -3   4     102     120
   1  -3   4     384     140
  -2   3  -4     980     150
  -2   3  -4    1302     170
   2  -3   4    1536     170
   2  -3   4    1600     180
   2  -3   4    1205     160
  -3   3  -4    3924     260
   3  -3   4    4626     290
   3  -3   4    4690     290
   3  -3   4    3956     260
   4  -3   4   34345    1220
   4  -3   4   34662    1240
   4  -3   4   33891    1240
   5  -3   4   15959     650
   5  -3   4   15593     650
   5  -3   4   15316     540
   5  -3   4   16365     700
   6  -3   4   12206     540
   6  -3   4   12723     540
   6  -3   4   12531     630
   6  -3   4   12257     450
   7  -3   4    8416     390
   7  -3   4    7849     450
   7  -3   4    8191     580
   7  -3   4    8494     450
   8  -3   4     711     170
   8  -3   4     533     300
   8  -3   4     184     310
   8  -3   4     788     190
   9  -3   4    4112     350
   9  -3   4    5503     630
   9  -3   4    5445     550
  10  -3   4    9787     720
  10  -3   4    7651     400
  10  -3   4    7088     670
  11  -3   4    6667     740
  11  -3   4    5572     670
  11   2  -4       7     350
  11   2  -4     339     370
  11   2  -4     287     400
  11   2  -4      27     330
  10   2  -4      12     300
  10   2  -4      12     310
  10   2  -4      14     330
  10   2  -4       2     320
   9   2  -4     338     320
   9   2  -4     589     350
   9   2  -4     157     290
   9   2  -4     375     310
   8   2  -4   11984     660
   8   2  -4   12864     600
   8   2  -4   10986     670
   8   2  -4   11857     640
   7   2  -4   40748    1480
   7   2  -4   41305    1640
   7   2  -4   39868    1510
   7   2  -4   40132    1610
   6   2  -4    9658     460
   6   2  -4    9863     490
   6   2  -4    9755     530
   5   2  -4    9199     630
   5   2  -4    8616     540
   5   2  -4    9683     590
   4   2  -4   42849    1130
   4   2  -4   42418    1040
   4   2  -4   42127    1170
  -4  -2   4   42732    1030
  -4  -2   4   42395    1040
   3   2  -4   24695    1300
   3   2  -4   25007    1350
   3   2  -4   22788    1250
  -3  -2   4   24439    1250
   2   2  -4  285895    7849
   2   2  -4  290418    7889
   2   2  -4  285247    7769
  -2  -2   4  302148    7889
  -2  -2   4  289321    7769
  -2  -2   4  289760    7849
   1   2  -4  272439    9749
   1   2  -4  268220   10459
   1   2  -4  265959   10279
  -1  -2   4  273317   10409
  -1  -2   4  272661   10279
  -1  -2   4  282513    9759
   0   2  -4    1535     260
   0   2  -4    1594     260
   0   2  -4    1287     220
   0  -2   4    1384     250
   0  -2   4    1632     220
   0  -2   4    1302     240
  -1   2  -4  269074   10729
  -1   2  -4  284077    9939
  -1   2  -4  277400   11569
   1  -2   4  275172   10479
   1  -2   4  278619   10639
   1  -2   4  283605    9949
  -2   2  -4  299983    7559
  -2   2  -4  291330    7989
   2  -2   4  301715    8059
   2  -2   4  306347    7989
   2  -2   4  287795    7559
  -3   2  -4   23445    1300
   3  -2   4   24978    1310
   3  -2   4   24474    1190
   3  -2   4   25027    1270
  -4   2  -4   43411    1100
  -4   2  -4   42260    1090
   4  -2   4   42063    1010
   4  -2   4   41934    1100
   4  -2   4   43481    1110
   5  -2   4    8735     500
   5  -2   4    8491     570
   5  -2   4    8997     460
   5  -2   4    8265     500
   6  -2   4   10278     520
   6  -2   4    9921     380
   6  -2   4    9433     400
   6  -2   4    9780     390
   7  -2   4   42945    1480
   7  -2   4   43903    1610
   7  -2   4   40597    1520
   7  -2   4   43336    1530
   8  -2   4   13028     520
   8  -2   4   11554     740
   8  -2   4   11649     670
   8  -2   4   12625     480
   9  -2   4     512     340
   9  -2   4     376     150
   9  -2   4      36     210
   9  -2   4     239     360
  10  -2   4      13     350
  10  -2   4      63     370
  11  -2   4     150     410
  11  -2   4     200     390
  11   1  -4    1086     380
  11   1  -4     325     400
  11   1  -4     668     380
  11   1  -4    1077     440
  10   1  -4    1662     370
  10   1  -4     869     330
  10   1  -4    1240     380
  10   1  -4     858     370
   9   1  -4     454     300
   9   1  -4     582     300
   9   1  -4     547     350
   9   1  -4    1501     390
   8   1  -4   10284     600
   8   1  -4   10526     590
   8   1  -4   10083     660
   8   1  -4   10204     670
   7   1  -4   10680     610
   7   1  -4   10690     530
   6   1  -4    4953     480
   6   1  -4    6053     400
   5   1  -4    1411     190
   5   1  -4    1196     220
   4   1  -4      60     130
   4   1  -4     219      60
   4   1  -4      84     160
   3   1  -4    1090     170
   3   1  -4     997     200
   3   1  -4     964     130
  -3  -1   4    1110     130
   2   1  -4    6974     170
   2   1  -4    7889     270
   2   1  -4    7919     220
  -2  -1   4    8140     220
  -2  -1   4    7637     180
   1   1  -4    1253     200
   1   1  -4    1940     240
  -1  -1   4    1799     210
  -1  -1   4    1491     200
  -1   1  -4    1593     210
  -1   1  -4    1960     210
  -1   1  -4    1345     210
  -1   1  -4    1563     170
   1  -1   4    1545     170
   1  -1   4    2066     210
   1  -1   4    1063     210
   1  -1   4    1492     210
  -2   1  -4    7411     210
  -2   1  -4    7888     160
   2  -1   4    8051     250
   2  -1   4    8036     170
   2  -1   4    7501     210
  -3   1  -4    1105     180
   3  -1   4     893     190
   3  -1   4    1159     180
   3  -1   4    1261     160
  -4   1  -4     203     100
   4  -1   4      31     100
   4  -1   4       5     160
   4  -1   4     110     110
   5  -1   4    1293     140
   5  -1   4    1461     130
   5  -1   4     954     150
   5  -1   4     781     210
   6  -1   4    6169     320
   6  -1   4    5637     320
   6  -1   4    6272     470
   6  -1   4    5627     360
   7  -1   4   10602     580
   7  -1   4   10274     380
   7  -1   4    9637     380
   7  -1   4    9892     460
   8  -1   4   10325     400
   8  -1   4    9590     390
   8  -1   4    9932     520
   8  -1   4   10496     640
   9  -1   4    1186     270
   9  -1   4     725     350
   9  -1   4     560     360
  10  -1   4    1193     370
  10  -1   4    1416     420
  11  -1   4    1416     450
  11  -1   4    1379     480
  11  -1   4     734     380
  11   0  -4    1190     350
  11   0  -4     778     370
  11   0  -4    1564     430
  11   0  -4    1179     430
  10   0  -4    4113     520
  10   0  -4    3978     420
  10   0  -4    3915     500
  10   0  -4    3622     440
   9   0  -4    5165     490
   9   0  -4    4120     510
   9   0  -4    4803     450
   8   0  -4    1127     280
   8   0  -4    1575     370
   7   0  -4    2263     310
   7   0  -4    1416     330
   6   0  -4   68339    2230
   6   0  -4   70504    2420
   5   0  -4   91304    3000
   5   0  -4   86660    2840
   5   0  -4   88766    2780
   4   0  -4   63534    1760
   4   0  -4   63503    1790
   4   0  -4   62600    1900
  -4   0   4   63105    1780
   3   0  -4  158713    6719
   3   0  -4  150500    6259
   3   0  -4  148800    6619
  -3   0   4  152045    6589
  -3   0   4  155450    6259
  -3   0   4  162817    6719
   2   0  -4   14042    2070
   2   0  -4   14277    1960
   2   0  -4   14400    2120
  -2   0   4   14600    1970
  -2   0   4   14438    2120
  -2   0   4   14462    2070
   1   0  -4    2054    3240
   1   0  -4    2216    3050
   1   0  -4    2634    3290
  -1   0   4    2268    3050
  -1   0   4    2382    3250
  -1   0   4    2593    3290
   0   0  -4  748046    7809
   0   0   4  734772    7799
  -1   0  -4    2462    3230
  -1   0  -4    2193    3070
   1   0   4    2293    3230
   1   0   4    2108    3070
  -2   0  -4   14086    2060
  -2   0  -4   14455    1970
   2   0   4   14101    2060
   2   0   4   14058    1970
  -3   0  -4  150758    6499
   3   0   4  150602    6499
   3   0   4  154936    6219
  -4   0  -4   65995    1860
   4   0   4   65512    1860
   4   0   4   65232    1820
   4   0   4   66059    1870
   5   0   4   90511    2850
   5   0   4   91518    2880
   5   0   4   91548    2930
   6   0   4   70949    2250
   6   0   4   69983    2230
   6   0   4   68312    2240
   6   0   4   69852    2280
   7   0   4    1890     260
   7   0   4    1574     310
   8   0   4    1495     320
   8   0   4     822     240
   9   0   4    4482     550
   9   0   4    4245     470
   9   0   4    4519     520
   9   0   4    4226     400
  10   0   4    3823     500
  10   0   4    3729     400
  10   0   4    4083     510
  10   0   4    3407     450
  11   0   4    1162     400
  11   0   4     390     390
  11   0   4    1044     460
  11  -1  -4    1748     500
  11  -1  -4     879     390
  10  -1  -4     944     390
  10  -1  -4    1830     370
  10  -1  -4    1146     300
   9  -1  -4    1355     290
   9  -1  -4     871     310
   9  -1  -4    1229     400
   8  -1  -4    9971     590
   8  -1  -4    9830     370
   8  -1  -4   10182     700
   7  -1  -4   10718     630
   7  -1  -4    9703     520
   7  -1  -4    9735     360
   7  -1  -4   10021     370
   6  -1  -4    6245     310
   6  -1  -4    5386     430
   6  -1  -4    5218     490
   6  -1  -4    6068     310
   5  -1  -4    1259     130
   5  -1  -4    1214     190
   5  -1  -4     657     220
  -5   1   4    1473     190
   4  -1  -4      31     150
   4  -1  -4     282     100
   4  -1  -4       1     180
  -4   1   4     126      90
  -4   1   4      11      70
   3  -1  -4     894     180
   3  -1  -4    1045     180
   3  -1  -4    1018     220
  -3   1   4    1227     190
  -3   1   4    1058     170
   2  -1  -4    7711     210
   2  -1  -4    7562     210
   2  -1  -4    8065     240
   2  -1  -4    8503     220
  -2   1   4    7888     220
  -2   1   4    7292     220
  -2   1   4    7903     200
   1  -1  -4    1728     220
   1  -1  -4    1289     210
   1  -1  -4    1547     210
   1  -1  -4    1765     200
  -1   1   4    1494     210
  -1   1   4    1716     200
  -1   1   4    1370     210
  -1  -1  -4    1377     210
  -1  -1  -4    1963     200
  -1  -1  -4    1494     220
   1   1   4    1365     220
   1   1   4    1506     210
   1   1   4    2025     200
  -2  -1  -4    8455     240
  -2  -1  -4    7794     190
   2   1   4    8236     190
   2   1   4    8148     200
   2   1   4    7466     230
  -3  -1  -4     995     180
  -3  -1  -4    1190     140
   3   1   4    1102     140
   3   1   4    1102     190
   3   1   4    1238     200
  -4  -1  -4      94      60
   4   1   4       5     140
   4   1   4     275     140
   4   1   4     170      70
   5   1   4    1160     190
   5   1   4    1429      90
   5   1   4    1317     190
   6   1   4    4737     440
   6   1   4    6432     440
   6   1   4    5918     410
   7   1   4    9536     510
   7   1   4   11283     560
   7   1   4   10638     570
   8   1   4   10806     630
   8   1   4    8955     570
   8   1   4   10977     640
   9   1   4    1275     380
   9   1   4    1239     320
   9   1   4     997     370
   9   1   4    1113     330
  10   1   4     885     310
  10   1   4    1353     380
  10   1   4     691     380
  10   1   4    1205     350
  11   1   4     717     400
  11   1   4    1130     370
  11   1   4    1605     460
  11   1   4    1307     470
  11  -2  -4      14     390
  11  -2  -4       7     350
  10  -2  -4      72     300
  10  -2  -4      26     280
  10  -2  -4      12     370
   9  -2  -4     465     140
   9  -2  -4      41     330
   9  -2  -4     413     300
   9  -2  -4     338     240
   8  -2  -4   11707     720
   8  -2  -4   13254     480
   8  -2  -4   12958     640
   8  -2  -4   11877     470
   7  -2  -4   41594    1490
   7  -2  -4   41946    1550
   7  -2  -4   42749    1700
   7  -2  -4   41477    1500
   6  -2  -4    9083     380
   6  -2  -4   10143     550
   6  -2  -4   10089     390
   6  -2  -4   10111     480
   5  -2  -4    8228     540
   5  -2  -4    8480     500
   5  -2  -4    9520     630
  -5   2   4    8699     490
   4  -2  -4   42146    1080
   4  -2  -4   42798    1180
   4  -2  -4   41913    1090
   4  -2  -4   43344    1050
  -4   2   4   42169    1080
  -4   2   4   41773    1080
   3  -2  -4   25991    1200
   3  -2  -4   23556    1300
   3  -2  -4   25292    1220
   3  -2  -4   23675    1250
  -3   2   4   22768    1210
  -3   2   4   18601    1240
   2  -2  -4  288454    7859
   2  -2  -4  286115    7759
   2  -2  -4  288827    7389
   2  -2  -4  285456    7339
  -2   2   4  289793    7389
  -2   2   4  291176    7859
  -2   2   4  287389    7759
  -2   2   4  298686    7339
   1  -2  -4  260193   10239
   1  -2  -4  269527    9749
   1  -2  -4  269952    9679
   1  -2  -4  269583   10439
  -1   2   4  274967    9749
  -1   2   4  275355    9639
  -1   2   4  269020   10309
   0  -2  -4    1316     240
   0  -2  -4    1102     250
   0  -2  -4    1270     230
   0  -2  -4    1352     250
   0   2   4    1290     250
   0   2   4    1603     240
   0   2   4    1341     250
   0   2   4    1136     240
  -1  -2  -4  281900   10479
  -1  -2  -4  271972   10419
   1   2   4  269940   10419
   1   2   4  287701   10549
   1   2   4  266635    9909
  -2  -2  -4  293808    7499
  -2  -2  -4  299828    7919
  -2  -2  -4  290977    7829
   2   2   4  287419    7909
   2   2   4  291108    7499
   2   2   4  293765    7839
  -3  -2  -4   23995    1290
  -3  -2  -4   26434    1350
   3   2   4   24219    1290
   3   2   4   25758    1340
   3   2   4   24371    1290
  -4  -2  -4   43551    1050
   4   2   4   42633    1120
   4   2   4   42319    1040
   4   2   4   40373    1080
   5   2   4    9043     580
   5   2   4    9433     450
   5   2   4    8824     560
   6   2   4    9971     480
   6   2   4    9484     490
   7   2   4   40744    1610
   7   2   4   41995    1540
   7   2   4   41438    1560
   8   2   4   12111     620
   8   2   4   11951     630
   8   2   4   10898     620
   9   2   4     837     350
   9   2   4     581     320
   9   2   4     324     330
   9   2   4     125     290
  10   2   4      13     280
  10   2   4      13     340
  10   2   4     114     330
  10   2   4      13     350
  11   2   4     175     370
  11   2   4       7     370
  11   2   4     158     370
  11   2   4       7     330
  11  -3  -4    5968     620
  11  -3  -4    5292     650
  10  -3  -4    7077     610
  10  -3  -4    8141     710
   9  -3  -4    5329     430
   9  -3  -4    4677     500
   9  -3  -4    4028     530
   9  -3  -4    5147     360
   8  -3  -4     712     340
   8  -3  -4     833     180
   8  -3  -4    1192     310
   7  -3  -4    8868     460
   7  -3  -4    8996     450
   7  -3  -4    7126     590
   7  -3  -4    9015     460
   7  -3  -4    7928     550
   6  -3  -4   12447     540
   6  -3  -4   11990     680
   6  -3  -4   12721     520
   6  -3  -4   12802     540
   6  -3  -4   13218     610
   5  -3  -4   15066     650
   5  -3  -4   15867     680
   5  -3  -4   16867     760
   5  -3  -4   15392     650
   5  -3  -4   16877     620
   4  -3  -4   32853    1230
   4  -3  -4   34730    1160
   4  -3  -4   33396    1300
   4  -3  -4   33950    1210
  -4   3   4   35689    1220
  -4   3   4   35165    1230
   3  -3  -4    4492     270
   3  -3  -4    4567     230
   3  -3  -4    4341     310
   3  -3  -4    4212     270
  -3   3   4    4147     280
  -3   3   4    4664     270
   2  -3  -4    1322     170
   2  -3  -4    1204     160
   2  -3  -4    1011     160
   2  -3  -4    1418     140
  -2   3   4    1524     150
  -2   3   4     989     160
  -2   3   4     597     130
   1  -3  -4     289     140
   1  -3  -4     491     120
   1  -3  -4     279     140
   1  -3  -4       0     130
   1  -3  -4     136     110
  -1   3   4     126     130
  -1   3   4      74     110
  -1   3   4     126     130
  -1   3   4     218     120
  -1  -3  -4     152     130
  -1  -3  -4     263     130
  -1  -3  -4     182     130
  -1  -3  -4     172     120
   1   3   4     243     120
   1   3   4      31     110
   1   3   4     112     130
   1   3   4     142     140
  -2  -3  -4    1394     150
  -2  -3  -4    1159     140
   2   3   4    1148     130
   2   3   4    1383     160
   2   3   4    1105     180
  -3  -3  -4    4441     220
  -3  -3  -4    4279     260
  -3  -3  -4    4451     280
   3   3   4    4903     270
   3   3   4    3596     250
   3   3   4    4462     230
  -4  -3  -4   33238    1190
   4   3   4   34108    1230
   4   3   4   35274    1270
   4   3   4   35294    1190
  -5  -3  -4   16236     590
   5   3   4   17108     730
   5   3   4   16266     710
   5   3   4   16464     600
   6   3   4   12697     600
   6   3   4   12342     610
   7   3   4    8251     590
   7   3   4    8329     560
   8   3   4     453     290
   8   3   4     908     300
   8   3   4     919     300
   8   3   4    1061     310
   9   3   4    4798     530
   9   3   4    5519     510
   9   3   4    5115     530
   9   3   4    5154     530
  10   3   4    7765     640
  10   3   4    7775     590
  10   3   4    7867     640
  10   3   4    7529     610
  11   3   4    4993     610
  11   3   4    6456     650
  11   3   4    6188     600
  11   3   4    6088     640
  10  -4  -4     680     400
  10  -4  -4    1041     360
  10  -4  -4     949     210
   9  -4  -4    2037     280
   9  -4  -4    2046     410
   9  -4  -4    2487     490
   8  -4  -4      34     270
   8  -4  -4     743     330
   8  -4  -4     250     200
   7  -4  -4    7617     370
   7  -4  -4    7356     400
   7  -4  -4    6842     510
   7  -4  -4    6945     400
   7  -4  -4    6408     430
   6  -4  -4      97     210
   6  -4  -4      54     180
   6  -4  -4     146     280
   6  -4  -4     101     200
   6  -4  -4     359     270
   5  -4  -4   14537     770
   5  -4  -4   12859     680
   5  -4  -4   13761     710
   5  -4  -4   14721     620
   5  -4  -4   14047     690
   4  -4  -4   13194     410
   4  -4  -4   12663     530
   4  -4  -4   12301     500
   4  -4  -4   12006     480
   3  -4  -4   52031    1960
   3  -4  -4   52729    2140
   3  -4  -4   49104    2100
   3  -4  -4   52389    2010
  -3   4   4   51985    1970
  -3   4   4   53189    2100
  -3   4   4   54219    2020
   2  -4  -4   23710     670
   2  -4  -4   24189     610
   2  -4  -4   25015     660
   2  -4  -4   24094     680
  -2   4   4   24931     610
  -2   4   4   25194     680
  -2   4   4   24477     650
   1  -4  -4    1867     320
   1  -4  -4    2018     340
   1  -4  -4    2012     290
   1  -4  -4    2374     310
  -1   4   4    2147     300
  -1   4   4    1713     340
  -1   4   4    1798     300
   0  -4  -4   25842     620
   0  -4  -4   25881     600
   0  -4  -4   26319     580
   0   4   4   25583     630
   0   4   4   25932     640
   0   4   4   25311     590
   0   4   4   27577     580
  -1  -4  -4    1996     320
  -1  -4  -4    2149     320
  -1  -4  -4    2340     340
  -1  -4  -4    1915     330
   1   4   4    2304     330
   1   4   4    2143     350
   1   4   4    2054     330
   1   4   4    1874     330
  -2  -4  -4   23391     640
  -2  -4  -4   24436     650
   2   4   4   24064     680
   2   4   4   23187     640
   2   4   4   25010     640
   2   4   4   24807     650
  -3  -4  -4   50698    2050
  -3  -4  -4   53453    2010
   3   4   4   53177    2110
   3   4   4   51955    2050
   3   4   4   48388    2000
  -4  -4  -4   13486     500
  -4  -4  -4   12561     430
   4   4   4   12979     520
   4   4   4   13328     440
   4   4   4   12866     530
  -5  -4  -4   14428     620
  -5  -4  -4   14530     610
   5   4   4   14622     630
   5   4   4   13681     740
   5   4   4   14096     740
  -6  -4  -4     158     100
  -6  -4  -4      45      90
   6   4   4     174     280
   6   4   4     218     250
   7   4   4    6941     460
   7   4   4    7817     490
   8   4   4     104     270
   8   4   4      33     290
   8   4   4     597     300
   9   4   4    1554     390
   9   4   4    2057     420
   9   4   4    1898     400
   9   4   4    1907     390
  10   4   4    1539     370
  10   4   4    1038     370
  10   4   4    1188     380
  10   4   4     888     370
  10  -5  -4    1238     430
  10  -5  -4    2666     530
  10  -5  -4    1907     290
   9  -5  -4    9486     780
   9  -5  -4    9228     690
   9  -5  -4    9080     550
   8  -5  -4   20390    1020
   8  -5  -4   20492     840
   8  -5  -4   18490     900
   7  -5  -4    4779     440
   7  -5  -4    4891     520
   7  -5  -4    6335     530
   6  -5  -4    5735     380
   6  -5  -4    5546     380
   6  -5  -4    4931     400
   6  -5  -4    5757     460
   6  -5  -4    5490     300
   5  -5  -4    4312     460
   5  -5  -4    4175     460
   5  -5  -4    4304     430
   5  -5  -4    5160     330
   5  -5  -4    4295     420
   4  -5  -4     304     240
   4  -5  -4     337     150
   4  -5  -4     272     230
   4  -5  -4     231     240
   4  -5  -4     207     230
   3  -5  -4    5335     480
   3  -5  -4    5728     480
   3  -5  -4    5856     460
   3  -5  -4    6203     390
  -3   5   4    6422     400
   2  -5  -4   23100     700
   2  -5  -4   21167     710
   2  -5  -4   23719     630
   2  -5  -4   22089     700
  -2   5   4   23295     720
  -2   5   4   23065     680
  -2   5   4   23054     640
   1  -5  -4    2083     300
   1  -5  -4    1671     270
   1  -5  -4    2274     320
   1  -5  -4    2106     250
   1  -5  -4    1649     250
  -1   5   4    1842     310
  -1   5   4    1634     230
  -1   5   4    1466     240
  -1   5   4    1760     290
  -1  -5  -4    1834     260
  -1  -5  -4    1314     250
  -1  -5  -4    2098     290
  -1  -5  -4    1656     270
   1   5   4    1619     280
   1   5   4    1992     280
   1   5   4    2068     270
   1   5   4    1745     190
   1   5   4    1745     270
  -2  -5  -4   23131     730
  -2  -5  -4   23349     700
  -2  -5  -4   23040     700
   2   5   4   23864     700
   2   5   4   22501     740
   2   5   4   24321     710
   2   5   4   23509     720
  -3  -5  -4    5991     480
  -3  -5  -4    5862     440
   3   5   4    5838     500
   3   5   4    6217     510
   3   5   4    6064     440
  -4  -5  -4     350     180
   4   5   4     205     240
   4   5   4     476     180
   4   5   4     512     240
  -5  -5  -4    4737     340
   5   5   4    5076     470
   5   5   4    5111     480
   5   5   4    5146     360
  -6  -5  -4    5043     260
   6   5   4    6080     450
   6   5   4    5713     420
   7   5   4    4688     500
   7   5   4    6054     540
   8   5   4   20324     940
   8   5   4   19887     890
   8   5   4   19887     960
   9   5   4   10171     670
   9   5   4   10399     740
   9   5   4   10022     740
  10   5   4    1003     430
  10   5   4    1733     460
  10   5   4    2421     430
  10   5   4    1368     410
  10  -6  -4    1085     460
  10  -6  -4     993     300
  10  -6  -4    1224     460
   9  -6  -4    3898     510
   9  -6  -4    3129     380
   9  -6  -4    2738     510
   8  -6  -4    5174     440
   8  -6  -4    5224     580
   8  -6  -4    4441     510
   7  -6  -4       6     310
   7  -6  -4     366     300
   7  -6  -4     157     250
   6  -6  -4      75     290
   6  -6  -4      33     240
   6  -6  -4      35     280
   6  -6  -4      33     240
   6  -6  -4     114     160
   5  -6  -4   15736     700
   5  -6  -4   18147     720
   5  -6  -4   14861     720
   5  -6  -4   16211     700
   5  -6  -4   17062     550
   4  -6  -4   14552     800
   4  -6  -4   15202     810
   4  -6  -4   14606     790
   4  -6  -4   14030     800
   4  -6  -4   15554     660
  -4   6   4   14922     670
   3  -6  -4   25120     830
   3  -6  -4   26242     860
   3  -6  -4   26510     730
   3  -6  -4   24029     830
  -3   6   4   25984     740
   2  -6  -4   25949    1070
   2  -6  -4   25514    1140
   2  -6  -4   26602    1200
   2  -6  -4   24989    1150
  -2   6   4   26639    1080
   1  -6  -4     610     150
   1  -6  -4     833     150
   1  -6  -4     833     210
   1  -6  -4     974     210
  -1   6   4     775     150
  -1   6   4     790     160
  -1   6   4     579     240
   0  -6  -4      19     170
   0  -6  -4     275     150
   0  -6  -4     357     190
   0   6   4     204     110
   0   6   4      45     170
   0   6   4     275     190
   0   6   4     299     210
  -1  -6  -4     941     190
  -1  -6  -4     955     190
  -1  -6  -4     785     180
   1   6   4     543     180
   1   6   4     682     220
   1   6   4    1132     190
   1   6   4     727     100
  -2  -6  -4   25666    1190
   2   6   4   28501    1210
   2   6   4   27227    1100
   2   6   4   26573    1240
   2   6   4   26074    1170
  -3  -6  -4   26863     840
   3   6   4   27198     870
   3   6   4   25024     890
   3   6   4   27299     840
  -4  -6  -4   15248     740
   4   6   4   15257     790
   4   6   4   14932     750
   4   6   4   14211     830
  -5  -6  -4   16423     610
   5   6   4   17960     750
   5   6   4   15722     740
  -6  -6  -4      26     150
   6   6   4      88     290
   6   6   4     221     280
   7   6   4     441     320
   7   6   4     378     240
   7   6   4     678     350
   8   6   4    4218     410
   8   6   4    4169     490
   8   6   4    3523     480
   9   6   4    2841     470
   9   6   4    2882     480
   9   6   4    2388     380
  10   6   4    1250     470
  10   6   4    1028     450
   9  -7  -4     544     290
   9  -7  -4    1034     450
   9  -7  -4     596     390
   8  -7  -4      10     320
   8  -7  -4      85     290
   8  -7  -4      56     360
   7  -7  -4    5707     570
   7  -7  -4    6804     600
   7  -7  -4    7553     570
   6  -7  -4    8811     600
   6  -7  -4    9187     560
   6  -7  -4    8768     600
   5  -7  -4    7956     620
   5  -7  -4    7810     610
   5  -7  -4    8612     440
   5  -7  -4    8548     640
   4  -7  -4   11886     590
   4  -7  -4   11413     560
   4  -7  -4   11457     420
   4  -7  -4   10519     570
  -4   7   4   11831     440
   3  -7  -4    1049     190
   3  -7  -4     598     280
   3  -7  -4     755     250
   3  -7  -4     778     290
  -3   7   4     748     200
   2  -7  -4      84     180
   2  -7  -4     180     240
   2  -7  -4       4     210
   2  -7  -4      51     150
  -2   7   4       0     180
   1  -7  -4     872     270
   1  -7  -4     820     180
   1  -7  -4     356     240
   1  -7  -4     706     190
  -1   7   4     776     200
  -1   7   4     398     270
  -1  -7  -4    1075     260
  -1  -7  -4     879     260
   1   7   4     995     130
   1   7   4     915     250
   1   7   4     651     240
   1   7   4    1093     290
  -2  -7  -4      67     210
   2   7   4       2     200
   2   7   4       4     220
   2   7   4      45     250
  -3  -7  -4     972     260
   3   7   4     863     260
   3   7   4     607     320
   3   7   4     741     310
  -4  -7  -4   11511     510
   4   7   4   11797     530
   4   7   4   11698     640
   4   7   4   11709     580
  -5  -7  -4    8444     520
   5   7   4    8407     670
   5   7   4    7870     640
   6   7   4    9130     610
   6   7   4   10084     660
   6   7   4    8991     440
   7   7   4    6872     470
   7   7   4    6727     610
   7   7   4    6707     590
   8   7   4     773     410
   8   7   4      10     360
   9   7   4     654     420
   9   7   4     602     420
   9  -8  -4     136     390
   9  -8  -4     287     440
   9  -8  -4     260     320
   8  -8  -4     626     380
   8  -8  -4    1471     410
   8  -8  -4     730     340
   7  -8  -4    9531     720
   7  -8  -4    9649     700
   7  -8  -4    8542     710
   6  -8  -4   14164     820
   6  -8  -4   16120     860
   6  -8  -4   16210     830
   5  -8  -4    6793     540
   5  -8  -4    5979     490
   5  -8  -4    5776     490
   4  -8  -4   15934     830
   4  -8  -4   16332     660
   4  -8  -4   15517     860
   4  -8  -4   15817     810
  -4   8   4   17031     690
   3  -8  -4   28680     910
   3  -8  -4   26501    1040
   3  -8  -4   29301    1090
   3  -8  -4   27197    1020
  -3   8   4   27849     930
   2  -8  -4   35093    1370
   2  -8  -4   34189    1470
   2  -8  -4   32946    1460
   2  -8  -4   34208    1540
  -2   8   4   34051    1390
   1  -8  -4   53125    1600
   1  -8  -4   52272    1520
   1  -8  -4   50985    1500
  -1   8   4   47849    1610
  -1   8   4   55359    1470
   0  -8  -4   52345    2240
   0  -8  -4   49520    2130
   0   8   4   53483    2110
   0   8   4   50359    2280
  -1  -8  -4   50245    1490
  -1  -8  -4   50112    1530
   1   8   4   50068    1590
   1   8   4   52564    1470
  -2  -8  -4   31150    1440
  -2  -8  -4   33033    1480
   2   8   4   34606    1440
   2   8   4   35629    1490
   2   8   4   32996    1550
  -3  -8  -4   28596    1060
   3   8   4   29448    1090
   3   8   4   31035    1080
   3   8   4   27345    1150
  -4  -8  -4   15924     760
   4   8   4   14255     860
   4   8   4   16090     850
  -5  -8  -4    6813     460
   5   8   4    6579     320
   5   8   4    6905     590
   5   8   4    6395     550
   6   8   4   19289     960
   6   8   4   15973     920
   7   8   4    8800     750
   7   8   4    9525     780
   8   8   4      12     390
   8   8   4     341     430
   9   8   4     351     440
   9   8   4     573     470
   8  -9  -4       1     390
   8  -9  -4       1     370
   8  -9  -4     561     370
   7  -9  -4      88     350
   7  -9  -4       0     320
   7  -9  -4     148     360
   6  -9  -4     272     350
   6  -9  -4     708     380
   6  -9  -4     454     350
   5  -9  -4      65     300
   5  -9  -4     848     340
   5  -9  -4     645     330
   4  -9  -4      24     260
   4  -9  -4     285     330
   4  -9  -4      24     310
  -4   9   4     171     210
   3  -9  -4     902     220
   3  -9  -4     992     360
   3  -9  -4    1047     290
   3  -9  -4     902     350
  -3   9   4    1293     270
   2  -9  -4     728     310
   2  -9  -4     242     280
   2  -9  -4     605     240
  -2   9   4     471     240
   1  -9  -4       0     300
   1  -9  -4     377     310
  -1   9   4       0     350
  -1   9   4     367     250
  -1  -9  -4     189     270
  -1  -9  -4       0     300
   1   9   4      75     340
   1   9   4       0     270
  -2  -9  -4     769     300
  -2  -9  -4    1148     350
   2   9   4     718     370
   2   9   4     923     310
  -3  -9  -4    1218     320
   3   9   4     394     330
   3   9   4    1154     400
  -4  -9  -4      26     250
   4   9   4     159     370
   4   9   4      26     340
   5   9   4     432     360
   5   9   4    1002     420
   6   9   4     850     430
   6   9   4     555     420
   7   9   4      90     420
   7   9   4       0     410
   8   9   4     337     470
   8   9   4     732     470
   7 -10  -4     743     400
   7 -10  -4     753     420
   7 -10  -4     558     380
   6 -10  -4    2066     480
   6 -10  -4    2811     460
   6 -10  -4    2189     470
   5 -10  -4   10695     740
   5 -10  -4   11170     740
   5 -10  -4   12092     810
   4 -10  -4   15226     840
   4 -10  -4   18003     930
   4 -10  -4   16700     840
   3 -10  -4   23176    1090
   3 -10  -4   21852     960
   3 -10  -4   23065    1040
  -3  10   4   21963     900
   2 -10  -4   29809    1200
   2 -10  -4   30174    1280
   2 -10  -4   30933    1340
  -2  10   4   29316    1170
   1 -10  -4   37500    1450
   1 -10  -4   42281    1550
  -1  10   4   40050    1400
  -1  10   4   39221    1590
   0 -10  -4   53693    2090
   0 -10  -4   60171    2220
   0  10   4   56635    2060
   0  10   4   54256    2260
  -1 -10  -4   39749    1520
  -1 -10  -4   42717    1560
   1  10   4   41428    1470
   1  10   4   40404    1630
  -2 -10  -4   29638    1290
  -2 -10  -4   31581    1300
   2  10   4   30121    1260
   2  10   4   30979    1390
  -3 -10  -4   22640    1000
   3  10   4   22135    1110
   3  10   4   23166    1030
  -4 -10  -4   16492     820
   4  10   4   16102     950
   4  10   4   15671     880
   5  10   4   12164     870
   5  10   4   11866     840
   6  10   4    1528     500
   6  10   4    1773     480
   7  10   4     332     490
   7  10   4      62     450
   7 -11  -4    1652     470
   7 -11  -4    2963     520
   7 -11  -4    2206     490
   6 -11  -4    1053     410
   6 -11  -4    1475     450
   6 -11  -4    1357     480
   5 -11  -4     520     420
   5 -11  -4    1198     430
   5 -11  -4     751     350
   4 -11  -4    1939     390
   4 -11  -4    2418     520
   4 -11  -4    2783     500
   3 -11  -4    2409     470
   3 -11  -4    2533     370
   3 -11  -4    3515     520
  -3  11   4    2751     350
   2 -11  -4     478     370
   2 -11  -4    1774     430
  -2  11   4    1099     310
   1 -11  -4    2244     440
   1 -11  -4    2847     480
  -1  11   4    2007     360
  -1  11   4    2145     510
  -1 -11  -4    2046     440
  -1 -11  -4    1908     400
   1  11   4    2046     380
   1  11   4    2204     490
  -2 -11  -4    1270     360
   2  11   4     749     450
   2  11   4    1218     380
  -3 -11  -4    2932     430
   3  11   4    2766     520
   3  11   4    2953     460
   4  11   4    1916     560
   4  11   4    2996     530
   5  11   4      12     420
   5  11   4    1138     450
   6  11   4    1160     480
   6  11   4    1052     520
   7  11   4    2142     620
   7  11   4    2858     610
   5 -12  -4     178     430
   5 -12  -4    1034     450
   5 -12  -4     552     390
   4 -12  -4    1125     480
   4 -12  -4    1450     400
   4 -12  -4    2339     540
   3 -12  -4    1830     470
   3 -12  -4    2963     530
   2 -12  -4    4356     560
   2 -12  -4    5373     630
  -2  12   4    5017     490
   1 -12  -4    5771     600
   1 -12  -4    6804     620
  -1  12   4    5667     500
  -1  12   4    6226     720
   0 -12  -4    3456     530
   0 -12  -4    2624     500
   0  12   4    3262     450
   0  12   4    4262     610
  -1 -12  -4    6465     630
  -1 -12  -4    7547     630
   1  12   4    5443     660
   1  12   4    5670     550
  -2 -12  -4    5955     590
   2  12   4    5441     580
   2  12   4    5500     710
   3  12   4    2810     600
   3  12   4    2018     490
   4  12   4     932     570
   4  12   4    1445     490
   5  12   4     896     500
   5  12   4     106     550
   4 -13  -4    2229     570
   4 -13  -4    1891     550
   3 -13  -4    2091     530
   3 -13  -4     999     480
   2 -13  -4       0     460
   2 -13  -4     738     460
   1 -13  -4       3     420
   1 -13  -4       3     430
  -1  13   4       3     360
  -1 -13  -4       3     450
  -1 -13  -4       3     410
   1  13   4     486     520
   1  13   4       3     380
  -2 -13  -4     364     410
   2  13   4      41     430
   2  13   4     756     580
   3  13   4     802     540
   3  13   4     227     450
   4  13   4     618     560
   4  13   4     750     610
   1 -14  -4    2308     560
   0 -14  -4    2271     550
   0 -14  -4     830     510
   0  14   4    1922     630
   0  14   4    1676     480
  -1 -14  -4    2470     550
   1  14   4    3177     700
   0  14  -5     611     620
   0 -14   5    1519     550
   4  13  -5      10     530
   4  13  -5      10     450
   3  13  -5       7     400
   3  13  -5       7     520
   2  13  -5       7     540
   2  13  -5     319     380
  -2 -13   5       7     410
  -2 -13   5       7     410
   1  13  -5     149     390
   1  13  -5       9     510
  -1 -13   5     393     430
  -1 -13   5     206     430
  -1  13  -5     633     560
   1 -13   5     158     430
   1 -13   5     624     460
  -2  13  -5     591     530
   2 -13   5     901     480
   2 -13   5       7     400
   3 -13   5       8     420
   3 -13   5       8     430
   4 -13   5     467     480
   4 -13   5     138     460
   5  12  -5     186     480
   5  12  -5     480     530
   4  12  -5     641     510
   4  12  -5     182     460
   3  12  -5      68     500
   3  12  -5     601     430
   2  12  -5    2684     450
   2  12  -5    2905     600
  -2 -12   5    2515     460
  -2 -12   5    2409     470
   1  12  -5    2710     590
   1  12  -5    2325     410
  -1 -12   5    2256     470
  -1 -12   5    2927     500
   0  12  -5    2756     410
   0  12  -5    3084     610
   0 -12   5    3592     530
   0 -12   5    2766     480
  -1  12  -5    1900     360
  -1  12  -5    2560     580
   1 -12   5    2067     460
   1 -12   5    2077     490
  -2  12  -5    1490     540
   2 -12   5    2923     500
   2 -12   5    3364     510
   3 -12   5     567     430
   3 -12   5     292     400
   4 -12   5     672     430
   4 -12   5     986     450
   5 -12   5       5     390
   5 -12   5     408     450
   7  11  -5    1306     560
   7  11  -5    1652     600
   6  11  -5    2708     620
   6  11  -5    3537     610
   5  11  -5    2029     580
   5  11  -5    1609     520
   4  11  -5    5274     680
   4  11  -5    6990     620
   3  11  -5    4727     520
   3  11  -5    3172     550
  -3 -11   5    4816     500
   2  11  -5    2900     550
   2  11  -5    1918     370
  -2 -11   5    2043     410
  -2 -11   5    2094     400
   1  11  -5     296     420
   1  11  -5     925     340
  -1 -11   5     879     380
  -1 -11   5     657     370
  -1  11  -5    1576     510
  -1  11  -5     872     290
   1 -11   5     825     380
   1 -11   5    1086     410
  -2  11  -5    2078     300
  -2  11  -5    1413     490
   2 -11   5    2016     430
   2 -11   5    2212     420
   2 -11   5    2005     290
   3 -11   5    4718     420
   3 -11   5    4659     520
   3 -11   5    4985     560
   4 -11   5    7327     660
   4 -11   5    7236     620
   4 -11   5    7806     580
   5 -11   5    2963     450
   5 -11   5    2774     520
   5 -11   5    2576     510
   6 -11   5    2816     510
   6 -11   5    2837     450
   6 -11   5    2246     470
   7 -11   5    1660     470
   7 -11   5    1522     490
   7  10  -5     457     490
   7  10  -5     595     500
   6  10  -5     129     420
   6  10  -5      83     460
   5  10  -5    1153     490
   5  10  -5    1548     430
   4  10  -5     154     410
   4  10  -5     170     340
  -4 -10   5     351     290
   3  10  -5     621     410
   3  10  -5     816     350
  -3 -10   5     343     290
   2  10  -5     118     350
   2  10  -5     187     310
  -2 -10   5      56     330
  -2 -10   5     159     300
   1  10  -5    1615     470
   1  10  -5     597     320
  -1 -10   5    1370     370
  -1 -10   5    1207     370
   0  10  -5    1543     460
   0  10  -5    1622     310
   0 -10   5    1821     370
   0 -10   5    1066     360
  -1  10  -5     835     430
  -1  10  -5     995     290
   1 -10   5    1454     390
   1 -10   5     923     220
   1 -10   5     651     340
  -2  10  -5      30     210
  -2  10  -5      32     390
   2 -10   5      32     210
   2 -10   5     327     360
   2 -10   5      32     310
  -3  10  -5     344     190
   3 -10   5     229     330
   3 -10   5     632     260
   3 -10   5     796     360
   4 -10   5      13     320
   4 -10   5     266     280
   4 -10   5     115     360
   5 -10   5    1252     400
   5 -10   5    1751     420
   5 -10   5    1564     360
   6 -10   5     222     350
   6 -10   5     308     350
   6 -10   5     394     370
   7 -10   5       2     390
   7 -10   5     891     390
   7 -10   5       2     350
   8   9  -5     267     480
   8   9  -5     879     500
   7   9  -5    1498     480
   7   9  -5    2067     510
   6   9  -5    5695     570
   6   9  -5    4384     620
   5   9  -5    9955     720
   5   9  -5    7973     680
   4   9  -5    2572     490
   4   9  -5    2930     450
  -4  -9   5    2356     350
   3   9  -5    4686     450
   3   9  -5    3452     490
  -3  -9   5    4325     410
   2   9  -5    3044     440
   2   9  -5    3810     400
  -2  -9   5    4284     420
  -2  -9   5    4052     430
   1   9  -5       8     240
   1   9  -5       8     330
  -1  -9   5      38     280
  -1  -9   5      32     280
  -1   9  -5       8     200
  -1   9  -5       8     350
   1  -9   5     420     180
   1  -9   5       8     260
   1  -9   5     272     320
  -2   9  -5    4693     330
  -2   9  -5    5065     560
   2  -9   5    4703     460
   2  -9   5    4200     350
   2  -9   5    4411     470
  -3   9  -5    4355     300
   3  -9   5    4100     440
   3  -9   5    4015     440
   3  -9   5    4260     370
   4  -9   5    2457     440
   4  -9   5    3314     460
   4  -9   5    2466     370
   5  -9   5    9531     670
   5  -9   5    9135     650
   5  -9   5    9714     700
   6  -9   5    4273     540
   6  -9   5    5038     560
   6  -9   5    3895     510
   7  -9   5    1878     410
   7  -9   5    1733     400
   7  -9   5    2075     440
   8  -9   5    1359     440
   8  -9   5    1467     450
   8  -9   5    1389     400
   9   8  -5       1     450
   9   8  -5     140     490
   8   8  -5      71     440
   8   8  -5       2     410
   7   8  -5     230     400
   7   8  -5     245     400
   6   8  -5     578     390
   6   8  -5     407     340
   5   8  -5     950     370
   5   8  -5    1674     430
  -5  -8   5    1524     270
   4   8  -5      57     350
   4   8  -5      73     330
  -4  -8   5      73     230
   3   8  -5    3064     460
   3   8  -5    2497     370
  -3  -8   5    2896     360
   2   8  -5    3289     350
   2   8  -5    2630     420
  -2  -8   5    3481     350
  -2  -8   5    2529     340
   1   8  -5    3918     350
   1   8  -5    2572     380
  -1  -8   5    3410     350
  -1  -8   5    3967     380
   0   8  -5    2171     330
   0   8  -5    2044     250
   0  -8   5    1451     160
   0  -8   5    2097     310
   0  -8   5    2213     300
  -1   8  -5    3887     450
  -1   8  -5    3731     300
   1  -8   5    3117     280
   1  -8   5    3643     380
   1  -8   5    4941     460
  -2   8  -5    2764     380
  -2   8  -5    2834     250
   2  -8   5    2571     280
   2  -8   5    2764     350
   2  -8   5    3452     400
  -3   8  -5    2795     250
   3  -8   5    2646     340
   3  -8   5    2767     400
   3  -8   5    4010     460
   4  -8   5      54     270
   4  -8   5     267     310
   4  -8   5     124     300
   5  -8   5    1173     340
   5  -8   5    1686     360
   5  -8   5    1313     370
   6  -8   5      13     310
   6  -8   5      22     330
   6  -8   5     652     330
   7  -8   5     288     310
   7  -8   5     329     370
   7  -8   5      96     340
   8  -8   5      35     370
   8  -8   5     372     390
   8  -8   5       2     300
   9  -8   5     180     410
   9  -8   5       1     300
   9  -8   5       1     380
   9   7  -5     138     420
   9   7  -5    1170     460
   8   7  -5    1577     460
   8   7  -5    1889     490
   7   7  -5     243     370
   7   7  -5     145     380
   6   7  -5     376     310
   6   7  -5       4     340
   6   7  -5     146     160
   5   7  -5    1023     360
   5   7  -5    1119     370
  -5  -7   5    1119     240
   4   7  -5    3074     420
   4   7  -5    3167     470
  -4  -7   5    3158     350
   3   7  -5     862     280
   3   7  -5     114     220
  -3  -7   5     467     200
   2   7  -5    2112     320
   2   7  -5    2357     270
  -2  -7   5    2211     250
  -2  -7   5    2026     260
   1   7  -5     702     230
   1   7  -5    1055     300
  -1  -7   5    1020     260
  -1  -7   5     985     240
  -1   7  -5    1490     300
  -2   7  -5    2125     170
  -2   7  -5    1902     280
   2  -7   5    2137     290
   2  -7   5    2516     270
   2  -7   5    2014     220
  -3   7  -5     339     110
   3  -7   5     114     240
   3  -7   5     362     230
   3  -7   5     766     210
   4  -7   5    2406     400
   4  -7   5    2646     400
   4  -7   5    2755     390
   5  -7   5    1455     350
   5  -7   5     927     320
   5  -7   5     259     300
   6  -7   5     191     310
   6  -7   5     599     290
   6  -7   5     182     300
   7  -7   5    1154     320
   7  -7   5     701     360
   7  -7   5     505     360
   8  -7   5    1292     440
   8  -7   5    1040     410
   8  -7   5    1907     350
   9  -7   5     571     410
   9  -7   5     544     300
   9  -7   5     635     430
  10   6  -5       8     430
  10   6  -5     237     330
  10   6  -5     211     400
   9   6  -5     126     400
   9   6  -5      11     380
   9   6  -5      88     290
   8   6  -5     661     390
   8   6  -5     368     250
   8   6  -5     281     380
   7   6  -5      25     320
   7   6  -5      96     340
   7   6  -5     363     230
   6   6  -5     106     170
   6   6  -5      63     320
   6   6  -5     115     320
  -6  -6   5       6     140
   5   6  -5     449     180
   5   6  -5     787     360
   5   6  -5     375     320
  -5  -6   5     487     210
   4   6  -5    5950     320
   4   6  -5    5842     400
   4   6  -5    5372     410
  -4  -6   5    6213     330
   3   6  -5      55     160
   3   6  -5      67     240
   3   6  -5     184     250
  -3  -6   5     107     190
   2   6  -5    2427     210
   2   6  -5    2451     290
   2   6  -5    2331     280
  -2  -6   5    2726     240
  -2  -6   5    2974     250
   1   6  -5    2524     300
   1   6  -5    2558     360
   1   6  -5    2856     280
  -1  -6   5    3140     330
  -1  -6   5    2899     300
   0   6  -5    3497     240
   0   6  -5    3730     230
   0   6  -5    3583     270
   0   6  -5    2736     260
   0  -6   5    3337     250
   0  -6   5    3138     270
  -1   6  -5    2356     330
  -1   6  -5    2997     270
  -1   6  -5    2765     300
   1  -6   5    3377     350
   1  -6   5    2382     300
  -2   6  -5    2501     160
  -2   6  -5    2716     280
   2  -6   5    3201     270
   2  -6   5    2657     250
   2  -6   5    2835     280
   3  -6   5     187     240
   3  -6   5     232     220
   3  -6   5      18     230
   4  -6   5    5782     380
   4  -6   5    5938     340
   4  -6   5    4959     340
   5  -6   5     479     270
   5  -6   5     628     300
   5  -6   5     504     260
   6  -6   5      18     240
   6  -6   5     102     210
   6  -6   5     102     270
   6  -6   5     102     280
   7  -6   5     265     260
   7  -6   5     703     350
   7  -6   5      31     310
   8  -6   5     122     250
   8  -6   5     621     370
   8  -6   5     151     360
   9  -6   5      13     240
   9  -6   5      37     360
   9  -6   5      64     390
  10  -6   5      31     410
  10  -6   5      37     420
  10  -6   5      81     260
  10   5  -5       0     300
  10   5  -5     207     330
  10   5  -5       9     400
  10   5  -5     142     410
   9   5  -5      81     390
   9   5  -5     278     300
   9   5  -5      33     280
   9   5  -5     284     410
   8   5  -5     234     270
   8   5  -5     234     360
   8   5  -5     341     360
   7   5  -5     960     340
   7   5  -5     832     250
   7   5  -5     496     330
   6   5  -5    2061     340
   6   5  -5    1893     330
   6   5  -5    1893     220
  -6  -5   5    1906     150
   5   5  -5     728     330
   5   5  -5     938     250
   5   5  -5     886     340
   5   5  -5     771     220
  -5  -5   5     828     200
   4   5  -5    6909     240
   4   5  -5    6979     280
   4   5  -5    7329     350
   4   5  -5    6994     380
  -4  -5   5    7786     290
   3   5  -5    6226     580
   3   5  -5    5805     550
   3   5  -5    6389     490
  -3  -5   5    6912     510
   2   5  -5    6595     250
   2   5  -5    6484     310
   2   5  -5    6965     300
   2   5  -5    6664     280
  -2  -5   5    6719     280
  -2  -5   5    6787     270
  -2  -5   5    7251     320
  -2  -5   5    6746     290
   1   5  -5    5993     420
   1   5  -5    5831     450
   1   5  -5    6317     400
   1   5  -5    5958     370
  -1  -5   5    5500     420
  -1  -5   5    5052     370
  -1  -5   5    6257     420
  -1   5  -5    5493     390
  -1   5  -5    5696     340
  -1   5  -5    5256     450
  -1   5  -5    5603     430
   1  -5   5    6071     420
   1  -5   5    5977     440
   1  -5   5    5654     400
   1  -5   5    6130     450
  -2   5  -5    6197     190
  -2   5  -5    7716     330
  -2   5  -5    7555     290
  -2   5  -5    6642     320
   2  -5   5    6711     300
   2  -5   5    7636     340
   2  -5   5    7447     310
   2  -5   5    7149     330
   3  -5   5    6586     570
   3  -5   5    5992     560
   3  -5   5    7097     560
   3  -5   5    5770     540
   4  -5   5    7610     360
   4  -5   5    6968     320
   4  -5   5    7817     340
   5  -5   5     355     250
   5  -5   5     852     290
   5  -5   5     616     270
   6  -5   5    2593     260
   6  -5   5    1608     250
   6  -5   5    1714     280
   7  -5   5     788     330
   7  -5   5    1163     360
   7  -5   5     670     240
   8  -5   5     656     390
   8  -5   5     763     350
   9  -5   5     205     240
   9  -5   5     291     350
   9  -5   5     162     390
  10  -5   5       8     390
  10  -5   5      12     390
  10  -5   5       8     210
  10   4  -5       3     310
  10   4  -5       3     300
  10   4  -5       3     340
  10   4  -5     737     400
   9   4  -5     225     330
   9   4  -5     655     310
   9   4  -5     862     400
   9   4  -5     655     330
   8   4  -5      49     240
   8   4  -5      23     310
   8   4  -5       2     320
   8   4  -5      49     260
   7   4  -5     303     250
   7   4  -5      14     300
   7   4  -5     130     310
   6   4  -5    2414     310
   6   4  -5    2332     230
   6   4  -5    2039     290
  -6  -4   5    2193     110
  -6  -4   5    2053     110
   5   4  -5    2158     390
   5   4  -5    3146     390
   5   4  -5    2371     320
  -5  -4   5    2756     240
  -5  -4   5    2586     250
   4   4  -5    1417     140
   4   4  -5    1470     220
  -4  -4   5    1251     130
  -4  -4   5    1270     110
   3   4  -5    6469     380
   3   4  -5    4598     390
   3   4  -5    6087     360
   3   4  -5    5534     480
  -3  -4   5    5608     400
  -3  -4   5    6510     480
  -3  -4   5    5880     390
   2   4  -5    5112     420
   2   4  -5    3987     350
   2   4  -5    5221     310
  -2  -4   5    4200     360
  -2  -4   5    4729     350
  -2  -4   5    4870     270
   1   4  -5    2071     240
   1   4  -5    2119     220
   1   4  -5    2055     280
  -1  -4   5    2151     230
   0   4  -5   32546     980
   0   4  -5   34215     990
   0   4  -5   32144    1090
   0   4  -5   33423    1060
   0  -4   5   31996     980
   0  -4   5   32525    1080
   0  -4   5   34532    1060
  -1   4  -5    2208     280
  -1   4  -5    1960     190
  -1   4  -5    1952     240
  -1   4  -5    2063     260
   1  -4   5    2208     260
   1  -4   5    2304     270
   1  -4   5    2071     250
  -2   4  -5    4142     380
  -2   4  -5    4679     250
  -2   4  -5    5659     410
  -2   4  -5    5549     360
   2  -4   5    4463     380
   2  -4   5    5121     380
   2  -4   5    5684     400
  -3   4  -5    7870     490
  -3   4  -5    5683     470
   3  -4   5    7828     500
   3  -4   5    6778     480
   3  -4   5    6502     470
   4  -4   5    1200     180
   4  -4   5    1441     200
   4  -4   5    1546     180
   4  -4   5    1930     210
   5  -4   5    2809     380
   5  -4   5    2879     360
   5  -4   5    2492     340
   6  -4   5    1939     210
   6  -4   5    2248     280
   6  -4   5    2193     230
   7  -4   5     269     220
   7  -4   5     550     330
   7  -4   5     170     120
   7  -4   5     331     130
   7  -4   5     227     200
   8  -4   5       8     310
   8  -4   5      55     330
   8  -4   5      55     200
   9  -4   5     444     380
   9  -4   5     621     230
   9  -4   5     794     380
  10  -4   5     258     360
  10  -4   5     313     200
  10  -4   5     324     410
  11   3  -5     666     360
  11   3  -5     552     430
  11   3  -5    1459     410
  11   3  -5    1623     410
  10   3  -5    1031     380
  10   3  -5    1077     380
  10   3  -5     966     350
  10   3  -5     820     420
   9   3  -5    1116     360
   9   3  -5    1944     400
   9   3  -5    1042     300
   8   3  -5    2212     390
   8   3  -5    1657     340
   8   3  -5    1838     360
   8   3  -5    1798     310
   7   3  -5    7335     530
   7   3  -5    6569     540
   7   3  -5    8255     610
   7   3  -5    7019     480
   6   3  -5    2983     310
   6   3  -5    3262     280
   5   3  -5    5145     470
   5   3  -5    5107     540
  -5  -3   5    5062     340
   4   3  -5    4522     140
   4   3  -5    5539     190
   4   3  -5    6273     270
  -4  -3   5    5204     140
   3   3  -5    6578     550
   3   3  -5    7082     630
   3   3  -5    6530     530
  -3  -3   5    7508     630
   2   3  -5    2926     130
   2   3  -5    3515     120
   2   3  -5    3802     180
  -2  -3   5    3094     100
  -2  -3   5    3074     130
   1   3  -5    1112     210
  -1  -3   5    1733     180
  -1   3  -5    1757     230
  -1   3  -5    1303     180
  -1   3  -5    1711     220
   1  -3   5    1341     200
   1  -3   5    1430     190
   1  -3   5    1378     210
  -2   3  -5    3199     160
  -2   3  -5    3557     180
  -2   3  -5    2754     150
   2  -3   5    3595     170
   2  -3   5    3691     160
   2  -3   5    2842     150
  -3   3  -5    6701     590
  -3   3  -5    7138     590
   3  -3   5    7152     590
   3  -3   5    7332     610
   3  -3   5    7124     590
  -4   3  -5    4809     190
   4  -3   5    5527     200
   4  -3   5    5836     260
   4  -3   5    5818     230
   5  -3   5    5066     490
   5  -3   5    4955     450
   5  -3   5    5186     440
   5  -3   5    5081     340
   6  -3   5    4032     240
   6  -3   5    4008     340
   6  -3   5    3697     180
   6  -3   5    3534     240
   7  -3   5    7884     440
   7  -3   5    7932     590
   7  -3   5    7471     370
   7  -3   5    7010     440
   8  -3   5    2270     220
   8  -3   5    2330     250
   8  -3   5    2633     390
   8  -3   5    1936     400
   9  -3   5     770     190
   9  -3   5     834     400
   9  -3   5    2183     410
  10  -3   5     588     180
  10  -3   5    1400     460
  10  -3   5     481     390
  11  -3   5    1329     470
  11  -3   5    1103     440
  11   2  -5       0     320
  11   2  -5       0     340
  11   2  -5       0     360
  11   2  -5     102     360
  10   2  -5     166     330
  10   2  -5      71     300
  10   2  -5     176     340
  10   2  -5       0     330
   9   2  -5     218     280
   9   2  -5     657     300
   9   2  -5       0     280
   9   2  -5     308     330
   8   2  -5     750     310
   8   2  -5    1275     300
   8   2  -5      33     250
   8   2  -5     504     260
   7   2  -5      81     230
   7   2  -5       4     260
   7   2  -5     138     300
   6   2  -5    2661     220
   6   2  -5    3487     260
   6   2  -5    2100     250
   5   2  -5   17094     810
   5   2  -5   17181     920
   5   2  -5   15744     730
   5   2  -5   16635     870
   4   2  -5    7785     230
   4   2  -5    8120     320
   4   2  -5    8342     390
  -4  -2   5    8366     230
   3   2  -5     812     120
   3   2  -5     648      80
   3   2  -5    1013     160
  -3  -2   5     847      80
  -3  -2   5    1062     120
   2   2  -5   58169    1890
   2   2  -5   58078    1960
   2   2  -5   58584    1910
  -2  -2   5   60154    1890
  -2  -2   5   59668    1910
   1   2  -5  107042    3180
   1   2  -5  110813    3440
   1   2  -5  103665    3390
  -1  -2   5  102448    3430
  -1  -2   5  108258    3390
  -1  -2   5  109941    3180
   0   2  -5   61836    2230
   0   2  -5   65101    2250
   0   2  -5   64329    2090
   0  -2   5   66706    2240
   0  -2   5   65532    2090
   0  -2   5   65170    2250
  -1   2  -5  107870    3450
  -1   2  -5  110059    3470
  -1   2  -5  108660    3250
   1  -2   5  106349    3450
   1  -2   5  110576    3470
   1  -2   5  107899    3250
  -2   2  -5   60366    1870
  -2   2  -5   58755    1960
   2  -2   5   60457    1970
   2  -2   5   61297    1870
   2  -2   5   61814    1980
  -3   2  -5     648     120
  -3   2  -5     164      40
   3  -2   5     760     120
   3  -2   5    1125     140
   3  -2   5     686      70
  -4   2  -5    7660     290
  -4   2  -5    8904     350
   4  -2   5    8647     360
   4  -2   5    7648     290
   4  -2   5    8056     240
  -5   2  -5   18058     840
   5  -2   5   16546     780
   5  -2   5   17945     840
   5  -2   5   17614     900
   6  -2   5    2779     270
   6  -2   5    2858     180
   6  -2   5    2873     170
   6  -2   5    2951     160
   7  -2   5       5     170
   7  -2   5     145     160
   7  -2   5      53     170
   7  -2   5     236     300
   8  -2   5     372     150
   8  -2   5     209     300
   8  -2   5     467     180
   9  -2   5     372     320
   9  -2   5     293     140
   9  -2   5      86     200
   9  -2   5       0     350
  10  -2   5     336     370
  10  -2   5     102     340
  11  -2   5     350     390
  11  -2   5     381     420
  11   1  -5       4     340
  11   1  -5     829     410
  11   1  -5     656     400
  11   1  -5    1233     370
  10   1  -5    2156     430
  10   1  -5    1553     360
  10   1  -5    1988     430
  10   1  -5    1138     340
   9   1  -5    4225     430
   9   1  -5    4571     500
   9   1  -5    5069     440
   9   1  -5    3828     480
   8   1  -5    4423     410
   8   1  -5    4082     460
   8   1  -5    5507     490
   7   1  -5     572     300
   7   1  -5     824     270
   6   1  -5    1511     200
   6   1  -5    1140     250
   5   1  -5    4157     460
   5   1  -5    4591     390
   4   1  -5   10802     210
   4   1  -5   10564     340
   4   1  -5   11081     280
  -4  -1   5   10743     200
   3   1  -5    4066     430
   3   1  -5    3539     360
   3   1  -5    3851     380
  -3  -1   5    3940     360
  -3  -1   5    4226     430
   2   1  -5    2459     320
   2   1  -5    1983     240
  -2  -1   5    2135     240
   1   1  -5   10350     330
   1   1  -5   10839     360
  -1  -1   5   10976     330
  -1  -1   5   10760     330
  -1  -1   5   11123     350
  -1   1  -5   10601     320
  -1   1  -5   11903     330
  -1   1  -5   10453     340
  -1   1  -5   10839     300
   1  -1   5   10567     300
   1  -1   5   10612     330
   1  -1   5   10441     340
   1  -1   5   11474     320
  -2   1  -5    2168     270
  -2   1  -5    2079     210
  -2   1  -5    1858     260
   2  -1   5    2252     220
   2  -1   5    2021     260
   2  -1   5    1952     270
  -3   1  -5    3462     380
   3  -1   5    3785     390
   3  -1   5    4024     360
   3  -1   5    4018     430
  -4   1  -5   10938     260
   4  -1   5   10938     260
   4  -1   5   11203     320
   4  -1   5   11130     260
  -5   1  -5    4563     330
   5  -1   5    4456     350
   5  -1   5    3912     440
   5  -1   5    4494     340
   6  -1   5    1323     160
   6  -1   5    1470     250
   6  -1   5    1613     140
   6  -1   5    1382     130
   7  -1   5     753     220
   7  -1   5     910     160
   7  -1   5     552     310
   7  -1   5     844     160
   8  -1   5    4717     450
   8  -1   5    4848     380
   8  -1   5    4607     250
   8  -1   5    4998     270
   9  -1   5    4306     500
   9  -1   5    4621     500
   9  -1   5    4560     360
  10  -1   5    2539     480
  10  -1   5    1442     450
  11  -1   5      94     400
  11  -1   5     776     420
  11  -1   5     711     370
  11  -1  -5     559     430
  11  -1  -5     327     320
  10  -1  -5    2121     380
  10  -1  -5     918     310
  10  -1  -5    1311     420
   9  -1  -5    5058     420
   9  -1  -5    4814     450
   9  -1  -5    4560     500
   8  -1  -5    4787     230
   8  -1  -5    4948     500
   8  -1  -5    5289     450
   8  -1  -5    4415     230
   7  -1  -5     807     310
   7  -1  -5     587     270
   7  -1  -5     873     140
   7  -1  -5     815     140
   6  -1  -5    1413     120
   6  -1  -5    1383     220
   6  -1  -5    1143     120
   6  -1  -5     751     250
   5  -1  -5    4295     340
   5  -1  -5    5146     420
   5  -1  -5    4303     450
  -5   1   5    4424     330
  -5   1   5    5022     410
  -4   1   5    6066     140
   3  -1  -5    6613     540
   3  -1  -5    7906     610
  -3   1   5    7680     540
  -3   1   5    7022     540
   2  -1  -5    1800     250
   2  -1  -5    2257     250
   2  -1  -5    2166     260
   2  -1  -5    2361     290
  -2   1   5    2090     250
  -2   1   5    2013     260
  -2   1   5    1925     250
   1  -1  -5   10851     350
   1  -1  -5   10840     340
   1  -1  -5   11237     320
   1  -1  -5   10680     350
  -1   1   5   11599     320
  -1   1   5   10953     340
  -1   1   5   10703     340
  -1  -1  -5   10695     340
  -1  -1  -5   10616     340
  -1  -1  -5   11613     310
   1   1   5   11081     340
   1   1   5   10638     340
   1   1   5   11194     320
  -2  -1  -5    1953     240
  -2  -1  -5    2124     270
   2   1   5    2098     240
   2   1   5    2207     280
   2   1   5    2162     240
  -3  -1  -5    3683     400
  -3  -1  -5    3921     370
   3   1   5    3689     410
   3   1   5    4386     410
   3   1   5    3921     370
  -4  -1  -5   11281     230
   4   1   5   11427     300
   4   1   5   10841     320
   4   1   5   11587     230
  -5  -1  -5    4574     290
   5   1   5    4597     300
   5   1   5    4513     420
   5   1   5    4216     410
   6   1   5    1019     230
   6   1   5    1530     210
   6   1   5     716     190
   7   1   5    1172     260
   7   1   5     706     260
   7   1   5     706     290
   8   1   5    4569     450
   8   1   5    4900     410
   8   1   5    5130     470
   9   1   5    3642     390
   9   1   5    4853     510
   9   1   5    5624     490
   9   1   5    4538     480
  10   1   5    1498     420
  10   1   5    1203     350
  10   1   5    1479     350
  10   1   5    1242     420
  11   1   5     130     390
  11   1   5     370     390
  11   1   5     348     350
  11  -2  -5     404     440
  11  -2  -5       0     340
  10  -2  -5       0     260
  10  -2  -5      61     380
  10  -2  -5     118     310
   9  -2  -5     288     130
   9  -2  -5     208     320
   9  -2  -5     348     290
   8  -2  -5      33     310
   8  -2  -5     408     140
   8  -2  -5     635     270
   7  -2  -5      66     300
   7  -2  -5     394     270
   7  -2  -5      93     150
   7  -2  -5     218     160
   6  -2  -5    3205     170
   6  -2  -5    2742     290
   6  -2  -5    2695     230
   6  -2  -5    2631     160
   5  -2  -5   17244     860
   5  -2  -5   17348     840
   5  -2  -5   16153     940
   5  -2  -5   18532     830
  -5   2   5   17366     830
   4  -2  -5    8193     340
   4  -2  -5    8292     370
   4  -2  -5    8452     300
   4  -2  -5    8033     300
  -4   2   5    8316     330
  -4   2   5    8575     300
   3  -2  -5     759     150
   3  -2  -5     931     130
   3  -2  -5    1109     120
   3  -2  -5     812     120
  -3   2   5     164      60
  -3   2   5    1013     130
   2  -2  -5   58389    1930
   2  -2  -5   59382    1840
   2  -2  -5   60769    1840
   2  -2  -5   58257    1970
  -2   2   5   60283    1970
  -2   2   5   59888    1840
  -2   2   5   61063    1930
  -2   2   5   58835    1840
   1  -2  -5  106962    3240
   1  -2  -5  106242    3210
   1  -2  -5  103920    3400
   1  -2  -5  107935    3430
  -1   2   5  108746    3430
  -1   2   5  110064    3210
  -1   2   5  105269    3230
   0  -2  -5   64897    2100
   0  -2  -5   61778    2200
   0  -2  -5   63107    2080
   0  -2  -5   66365    2220
   0   2   5   64330    2090
   0   2   5   63000    2100
   0   2   5   65337    2210
   0   2   5   62305    2220
  -1  -2  -5  114566    3540
  -1  -2  -5  105301    3510
   1   2   5  105605    3510
   1   2   5  112528    3360
   1   2   5  116360    3540
  -2  -2  -5   61871    1960
  -2  -2  -5   60554    1940
  -2  -2  -5   59299    1870
   2   2   5   59856    1940
   2   2   5   59653    1960
   2   2   5   59927    1880
  -3  -2  -5     761      90
  -3  -2  -5    1016     130
  -3  -2  -5     165      70
   3   2   5     950      90
   3   2   5     779     140
   3   2   5    1016     130
  -4  -2  -5    9003     350
  -4  -2  -5    8414     250
   4   2   5    8464     260
   4   2   5    9125     330
   4   2   5    8537     350
  -5  -2  -5   17835     780
   5   2   5   17756     780
   5   2   5   17191     890
   5   2   5   16626     870
   6   2   5    2890     240
   6   2   5    2669     230
   7   2   5     348     290
   7   2   5      57     250
   7   2   5     149     250
   8   2   5     157     250
   8   2   5      30     250
   8   2   5     648     310
   9   2   5       0     300
   9   2   5     313     290
   9   2   5     432     330
   9   2   5       0     270
  10   2   5      35     340
  10   2   5     140     300
  10   2   5     130     340
  10   2   5       0     310
  11   2   5     156     370
  11   2   5      12     380
  11   2   5       0     320
  11   2   5      12     340
  11  -3  -5     700     370
  11  -3  -5    1237     480
  10  -3  -5    1813     460
  10  -3  -5     382     330
   9  -3  -5    1288     390
   9  -3  -5    1182     200
   9  -3  -5     660     300
   8  -3  -5    2120     410
   8  -3  -5    2433     360
   8  -3  -5    2120     240
   7  -3  -5    7320     530
   7  -3  -5    6842     580
   7  -3  -5    7071     430
   7  -3  -5    7358     430
   7  -3  -5    8461     460
   6  -3  -5    4011     250
   6  -3  -5    3776     240
   6  -3  -5    3300     320
   6  -3  -5    4048     250
   6  -3  -5    3949     320
   5  -3  -5    4362     430
   5  -3  -5    5467     430
   5  -3  -5    4685     470
   5  -3  -5    5648     550
   4  -3  -5    4878     220
   4  -3  -5    5354     180
   4  -3  -5    5316     200
   4  -3  -5    4839     220
  -4   3   5    5204     220
  -4   3   5    5279     190
   3  -3  -5    7425     590
   3  -3  -5    6834     620
   3  -3  -5    7153     540
   3  -3  -5    6737     590
  -3   3   5    6847     540
  -3   3   5    7481     580
  -3   3   5    7285     590
  -3   3   5    6806     610
   2  -3  -5    3198     120
   2  -3  -5    3858     170
   2  -3  -5    2548     140
   2  -3  -5    2796     150
  -2   3   5    2571     130
  -2   3   5    3398     150
  -2   3   5    2905     130
   1  -3  -5    1333     220
   1  -3  -5    1490     200
   1  -3  -5    1803     250
   1  -3  -5    1742     230
   1  -3  -5    1505     210
  -1   3   5    1834     220
  -1   3   5    1423     210
  -1   3   5    1642     220
  -1   3   5    1193     210
  -1  -3  -5    1320     200
  -1  -3  -5    1690     220
  -1  -3  -5    1706     210
   1   3   5    1614     220
   1   3   5    1276     190
   1   3   5    1357     200
  -2  -3  -5    3381     140
  -2  -3  -5    2665     130
   2   3   5    3014     130
   2   3   5    3538     150
   2   3   5    3221     160
  -3  -3  -5    7503     590
  -3  -3  -5    6711     550
  -3  -3  -5    7412     590
   3   3   5    7057     550
   3   3   5    6863     580
   3   3   5    7294     600
  -4  -3  -5    6294     240
  -4  -3  -5    5544     150
   4   3   5    4885     150
   4   3   5    6502     220
  -5  -3  -5    5203     370
   5   3   5    4980     380
   5   3   5    5481     520
   5   3   5    5699     490
   6   3   5    3717     290
   6   3   5    3403     310
   6   3   5    3617     160
   7   3   5    8065     540
   7   3   5    7010     550
   8   3   5    2289     340
   8   3   5    3047     400
   8   3   5    2178     370
   9   3   5    1475     360
   9   3   5     992     360
   9   3   5    1611     350
   9   3   5    1013     330
  10   3   5     714     360
  10   3   5     249     370
  10   3   5     669     340
  10   3   5     778     360
  11   3   5     908     410
  11   3   5    1280     410
  11   3   5    1423     410
  10  -4  -5     567     410
  10  -4  -5     205     340
  10  -4  -5     171     200
   9  -4  -5     142     320
   9  -4  -5     545     390
   9  -4  -5     394     210
   8  -4  -5     152     340
   8  -4  -5       4     190
   8  -4  -5     357     300
   7  -4  -5     142     300
   7  -4  -5      52     200
   7  -4  -5     250     290
   7  -4  -5     163     220
   7  -4  -5      91     210
   6  -4  -5    1695     260
   6  -4  -5    1927     300
   6  -4  -5    2416     210
   6  -4  -5    2055     220
   6  -4  -5    2361     240
   5  -4  -5    3208     290
   5  -4  -5    2739     390
   5  -4  -5    2135     330
   5  -4  -5    2378     330
   4  -4  -5    1643     190
   4  -4  -5    1908     150
   4  -4  -5    1826     210
   4  -4  -5    1381     200
   3  -4  -5    5273     450
   3  -4  -5    6535     390
   3  -4  -5    5502     450
   3  -4  -5    5848     460
  -3   4   5    6452     440
  -3   4   5    6087     390
  -3   4   5    6527     470
  -3   4   5    5996     440
   2  -4  -5    5104     390
   2  -4  -5    4167     380
   2  -4  -5    4854     370
   2  -4  -5    4987     330
  -2   4   5    5464     380
  -2   4   5    4937     340
  -2   4   5    5029     380
   1  -4  -5    1918     230
   1  -4  -5    2499     280
   1  -4  -5    2190     260
   1  -4  -5    2182     240
  -1   4   5    2247     250
  -1   4   5    2296     270
  -1   4   5    1950     230
   0  -4  -5   32345     970
   0  -4  -5   30673     980
   0  -4  -5   30291    1020
   0   4   5   32483     990
   0   4   5   31911    1040
   0   4   5   32451    1030
   0   4   5   32514     970
  -1  -4  -5    2142     260
  -1  -4  -5    1958     260
  -1  -4  -5    2215     260
  -1  -4  -5    2014     260
   1   4   5    1982     240
   1   4   5    2247     270
   1   4   5    1919     250
   1   4   5    2320     260
  -2  -4  -5    4733     360
   2   4   5    5394     390
   2   4   5    5394     380
   2   4   5    4700     360
   2   4   5    5017     390
  -3  -4  -5    6087     450
  -3  -4  -5    5724     410
   3   4   5    6228     460
   3   4   5    6311     450
   3   4   5    6303     420
  -4  -4  -5    1719     130
  -4  -4  -5    1389     170
   4   4   5    1124     190
   4   4   5    1686     200
   4   4   5    1566     140
  -5  -4  -5    2585     260
   5   4   5    3256     380
   5   4   5    2632     380
   5   4   5    3090     280
  -6  -4  -5    2209     120
  -6  -4  -5    2237     130
   6   4   5    1898     260
   6   4   5    2525     280
   7   4   5     226     270
   7   4   5     355     300
   8   4   5      55     280
   8   4   5       8     270
   9   4   5     796     360
   9   4   5     387     330
   9   4   5     437     330
   9   4   5     512     310
  10   4   5     180     350
  10   4   5      75     340
  10   4   5       3     340
  10   4   5       3     310
  10  -5  -5       8     220
  10  -5  -5       8     370
  10  -5  -5     234     410
   9  -5  -5     150     230
   9  -5  -5      92     340
   9  -5  -5     200     390
   8  -5  -5     454     340
   8  -5  -5     286     240
   8  -5  -5     286     350
   7  -5  -5     428     230
   7  -5  -5     962     340
   7  -5  -5     655     310
   6  -5  -5    1824     320
   6  -5  -5    1439     190
   6  -5  -5    1533     250
   6  -5  -5    1302     280
   6  -5  -5    1824     260
   5  -5  -5    1493     320
   5  -5  -5    1265     340
   5  -5  -5    1699     330
   5  -5  -5    1493     370
   5  -5  -5    1354     240
   4  -5  -5    7721     360
   4  -5  -5    6473     310
   4  -5  -5    7790     260
   4  -5  -5    7417     340
  -4   5   5    6899     260
   3  -5  -5    6195     540
   3  -5  -5    6135     550
   3  -5  -5    6522     460
   3  -5  -5    5818     540
  -3   5   5    6135     470
   2  -5  -5    7270     320
   2  -5  -5    5817     260
   2  -5  -5    6984     340
   2  -5  -5    7093     320
   2  -5  -5    7120     250
  -2   5   5    6378     280
  -2   5   5    6433     290
  -2   5   5    6585     290
  -2   5   5    6599     270
   1  -5  -5    5708     430
   1  -5  -5    6031     450
   1  -5  -5    5632     430
   1  -5  -5    5682     390
   1  -5  -5    5776     370
  -1   5   5    5242     460
  -1   5   5    5869     440
  -1   5   5    5327     370
  -1   5   5    5784     390
  -1  -5  -5    5912     430
  -1  -5  -5    5479     420
  -1  -5  -5    6236     440
  -1  -5  -5    5912     400
   1   5   5    5471     330
   1   5   5    6596     430
   1   5   5    5598     440
   1   5   5    5691     430
   1   5   5    5759     420
  -2  -5  -5    7038     300
  -2  -5  -5    5788     260
  -2  -5  -5    5831     270
   2   5   5    7392     310
   2   5   5    6294     310
   2   5   5    6599     270
   2   5   5    7432     310
  -3  -5  -5    6557     550
  -3  -5  -5    6177     510
   3   5   5    6999     570
   3   5   5    5985     560
   3   5   5    6512     520
  -4  -5  -5    7491     330
  -4  -5  -5    7002     280
   4   5   5    7946     290
   4   5   5    7184     330
   4   5   5    6577     320
  -5  -5  -5     827     200
   5   5   5    1189     320
   5   5   5    1128     340
   5   5   5     684     210
  -6  -5  -5    1807     160
   6   5   5    2231     300
   6   5   5    1516     300
   7   5   5     413     290
   7   5   5     570     320
   8   5   5     227     290
   8   5   5     313     340
   8   5   5     730     350
   9   5   5     231     360
   9   5   5     375     320
   9   5   5      64     350
  10   5   5       8     360
  10   5   5       8     330
  10   5   5       8     350
  10   5   5       8     370
  10  -6  -5     105     250
  10  -6  -5       8     380
  10  -6  -5     296     420
   9  -6  -5     104     360
   9  -6  -5      74     250
   9  -6  -5     340     410
   8  -6  -5       0     240
   8  -6  -5       0     340
   8  -6  -5      24     320
   7  -6  -5     247     330
   7  -6  -5     144     300
   7  -6  -5     110     250
   6  -6  -5       8     170
   6  -6  -5     107     240
   6  -6  -5      85     300
   6  -6  -5     135     280
   6  -6  -5     107     250
   5  -6  -5     293     280
   5  -6  -5     969     320
   5  -6  -5     598     280
   5  -6  -5     546     280
   5  -6  -5     299     180
   4  -6  -5    6383     380
   4  -6  -5    6668     400
   4  -6  -5    6133     380
   4  -6  -5    5084     270
   4  -6  -5    5218     350
  -4   6   5    5905     290
   3  -6  -5      15     150
   3  -6  -5      15     230
   3  -6  -5      25     200
   3  -6  -5      34     210
  -3   6   5     173     170
   2  -6  -5    2938     240
   2  -6  -5    3091     290
   2  -6  -5    2784     270
   2  -6  -5    2962     220
  -2   6   5    2221     210
   1  -6  -5    2909     280
   1  -6  -5    3401     360
   1  -6  -5    2901     280
   1  -6  -5    2781     330
  -1   6   5    2952     320
  -1   6   5    2347     340
  -1   6   5    3211     280
   0  -6  -5    3378     280
   0  -6  -5    2941     250
   0  -6  -5    3192     230
   0   6   5    3254     240
   0   6   5    3117     260
   0   6   5    2866     180
   0   6   5    2752     280
  -1  -6  -5    3053     320
  -1  -6  -5    2412     300
  -1  -6  -5    3096     340
   1   6   5    3122     350
   1   6   5    3452     350
   1   6   5    2625     340
   1   6   5    3062     230
  -2  -6  -5    2890     260
   2   6   5    3220     290
   2   6   5    3208     270
  -3  -6  -5      52     190
   3   6   5     316     250
   3   6   5     192     190
   3   6   5     385     240
  -4  -6  -5    5625     310
   4   6   5    6272     390
   4   6   5    5865     400
   4   6   5    6260     350
  -5  -6  -5     593     220
   5   6   5     378     310
   5   6   5     464     210
   5   6   5     850     320
  -6  -6  -5       8     150
   6   6   5      89     280
   6   6   5      16     300
   7   6   5      25     300
   7   6   5     462     320
   8   6   5     305     270
   8   6   5       0     350
   8   6   5     530     360
   9   6   5       9     290
   9   6   5     402     400
   9   6   5       9     350
  10   6   5      12     390
  10   6   5       8     400
   9  -7  -5     232     420
   9  -7  -5      10     290
   9  -7  -5     598     390
   8  -7  -5    2111     420
   8  -7  -5    1587     430
   8  -7  -5    1355     350
   7  -7  -5     545     350
   7  -7  -5     462     340
   7  -7  -5     751     300
   6  -7  -5    1040     320
   6  -7  -5    1078     340
   6  -7  -5    1191     340
   5  -7  -5     705     320
   5  -7  -5    1068     200
   5  -7  -5     536     300
   5  -7  -5    1147     320
   4  -7  -5    2747     390
   4  -7  -5    3014     420
   4  -7  -5    2432     400
   4  -7  -5    2622     300
  -4   7   5    2947     300
   3  -7  -5     632     220
   3  -7  -5     114     230
   3  -7  -5     766     150
   3  -7  -5    1060     220
  -3   7   5     798     180
   2  -7  -5    2199     290
   2  -7  -5    2052     200
   2  -7  -5    2002     230
   2  -7  -5    2126     290
  -2   7   5    2089     220
   1  -7  -5    1036     210
   1  -7  -5    1089     280
   1  -7  -5     702     230
   1  -7  -5    1080     210
  -1   7   5     907     220
  -1   7   5     676     290
  -1  -7  -5    1180     290
  -1  -7  -5     671     230
   1   7   5    1312     270
   1   7   5     997     140
   1   7   5     962     250
   1   7   5     739     260
   2   7   5    2113     250
   2   7   5    1688     290
   2   7   5    2564     140
   2   7   5    2199     280
  -3  -7  -5     529     210
   3   7   5     471     270
   3   7   5     116     200
   3   7   5     654     260
  -4  -7  -5    2608     340
   4   7   5    3229     360
   4   7   5    2700     400
   4   7   5    2625     410
  -5  -7  -5    1455     250
   5   7   5     935     360
   5   7   5     953     330
   6   7   5       4     290
   6   7   5     362     350
   7   7   5     232     230
   7   7   5     748     370
   7   7   5     880     400
   8   7   5    1566     420
   8   7   5    2261     460
   9   7   5     865     440
   9   7   5      98     430
   9  -8  -5       1     300
   9  -8  -5       1     400
   9  -8  -5       1     390
   8  -8  -5     741     390
   8  -8  -5     162     380
   8  -8  -5       2     300
   7  -8  -5     286     360
   7  -8  -5     270     320
   7  -8  -5     262     350
   6  -8  -5     502     330
   6  -8  -5       1     310
   6  -8  -5      17     320
   5  -8  -5    1117     340
   5  -8  -5    1238     380
   5  -8  -5    1377     350
   4  -8  -5      53     170
   4  -8  -5      43     300
   4  -8  -5     175     280
   4  -8  -5     502     340
  -4   8   5     144     210
   3  -8  -5    3775     440
   3  -8  -5    3065     360
   3  -8  -5    2443     370
   3  -8  -5    2962     280
  -3   8   5    2906     300
   2  -8  -5    3374     400
   2  -8  -5    2756     270
   2  -8  -5    2999     380
   2  -8  -5    3526     310
  -2   8   5    3100     310
   1  -8  -5    3106     370
   1  -8  -5    3252     390
  -1   8   5    3721     340
  -1   8   5    3799     450
   0  -8  -5    2417     330
   0  -8  -5    2154     310
   0   8   5    1741     270
   0   8   5    1869     370
  -1  -8  -5    3300     360
  -1  -8  -5    3826     410
   1   8   5    3446     240
   1   8   5    3787     370
   1   8   5    3135     410
  -2  -8  -5    2904     340
   2   8   5    2985     340
   2   8   5    2448     330
   2   8   5    2975     400
  -3  -8  -5    2518     340
   3   8   5    2407     420
   3   8   5    3057     370
   3   8   5    3637     430
  -4  -8  -5       1     220
   4   8   5       1     310
   4   8   5      32     230
   4   8   5     292     340
  -5  -8  -5    1353     280
   5   8   5     992     380
   5   8   5    1001     390
   6   8   5    1039     400
   6   8   5     763     390
   7   8   5     296     400
   7   8   5     685     430
   8   8   5       2     430
   8   8   5       2     390
   9   8   5      22     420
   9   8   5     151     450
   8  -9  -5    1314     450
   8  -9  -5    1530     450
   8  -9  -5     775     380
   7  -9  -5    1690     430
   7  -9  -5    3021     460
   7  -9  -5    2011     440
   6  -9  -5    5235     550
   6  -9  -5    4362     520
   6  -9  -5    3907     530
   5  -9  -5    9235     670
   5  -9  -5    8310     630
   5  -9  -5    6528     570
   4  -9  -5    2478     440
   4  -9  -5    2169     420
   4  -9  -5    2535     380
  -4   9   5    2817     310
   3  -9  -5    4260     460
   3  -9  -5    4853     330
   3  -9  -5    4610     400
   3  -9  -5    4726     480
  -3   9   5    4546     370
   2  -9  -5    3829     420
   2  -9  -5    3748     440
   2  -9  -5    4474     370
  -2   9   5    4554     380
   1  -9  -5       8     300
   1  -9  -5      13     300
  -1   9   5       8     240
  -1   9   5      18     360
  -1  -9  -5     195     280
  -1  -9  -5     170     310
   1   9   5      60     280
   1   9   5       8     360
  -2  -9  -5    4687     460
   2   9   5    4234     480
   2   9   5    4597     450
  -3  -9  -5    4162     400
   3   9   5    4555     460
   3   9   5    4099     500
  -4  -9  -5    2797     370
   4   9   5    2168     420
   4   9   5    2486     470
   5   9   5    8521     650
   5   9   5    8623     690
   6   9   5    4631     570
   6   9   5    4273     580
   7   9   5    2238     500
   7   9   5    2032     500
   8   9   5    1801     500
   8   9   5     625     460
   7 -10  -5       2     370
   7 -10  -5       2     370
   7 -10  -5       2     370
   6 -10  -5       1     350
   6 -10  -5       1     380
   6 -10  -5      47     370
   5 -10  -5     957     390
   5 -10  -5     894     360
   5 -10  -5    1561     410
   4 -10  -5     235     290
   4 -10  -5     480     360
   4 -10  -5      79     340
  -4  10   5     123     230
   3 -10  -5     146     260
   3 -10  -5     500     360
   3 -10  -5    1085     380
  -3  10   5       0     240
   2 -10  -5     173     340
   2 -10  -5      80     330
   2 -10  -5     106     240
  -2  10   5      32     270
   1 -10  -5     813     370
   1 -10  -5    1421     380
  -1  10   5     760     440
  -1  10   5     848     310
   0 -10  -5    1977     390
   0 -10  -5    1868     410
   0  10   5    1470     340
   0  10   5    1470     440
  -1 -10  -5    1137     410
  -1 -10  -5    1326     380
   1  10   5     641     420
   1  10   5    1083     360
  -2 -10  -5     342     320
   2  10   5      33     360
   2  10   5     327     340
  -3 -10  -5     807     310
   3  10   5     879     370
   3  10   5     602     420
  -4 -10  -5     298     290
   4  10   5     153     370
   4  10   5      13     380
   5  10   5    1252     480
   5  10   5     727     410
   6  10   5     385     450
   6  10   5     176     460
   7  10   5       2     450
   7  10   5     403     440
   7 -11  -5    2288     500
   6 -11  -5    2830     500
   6 -11  -5    2430     460
   6 -11  -5    2155     470
   5 -11  -5    1813     430
   5 -11  -5    2754     520
   5 -11  -5    2113     510
   4 -11  -5    8320     680
   4 -11  -5    6608     550
   4 -11  -5    6394     590
   3 -11  -5    3951     500
   3 -11  -5    4456     450
   3 -11  -5    5982     610
  -3  11   5    5129     440
   2 -11  -5    1609     430
   2 -11  -5    2325     430
  -2  11   5    1650     340
   1 -11  -5     567     350
   1 -11  -5    1039     420
  -1  11   5    1434     490
  -1  11   5     413     310
  -1 -11  -5    1105     420
  -1 -11  -5     531     370
   1  11   5    1274     430
   1  11   5     577     350
  -2 -11  -5    2557     430
   2  11   5    2205     420
   2  11   5    2433     510
  -3 -11  -5    5212     520
   3  11   5    4974     540
   3  11   5    4420     610
   4  11   5    8155     680
   4  11   5    7248     730
   5  11   5    2390     550
   5  11   5    3203     620
   6  11   5    3233     610
   6  11   5    2844     560
   7  11   5     462     550
   7  11   5     885     520
   5 -12  -5     556     450
   5 -12  -5     136     380
   5 -12  -5       6     420
   4 -12  -5    1111     370
   4 -12  -5     578     410
   4 -12  -5    1152     490
   3 -12  -5     539     440
   3 -12  -5      84     420
   2 -12  -5    2906     520
   2 -12  -5    3526     560
   1 -12  -5    1632     490
   1 -12  -5    2459     490
  -1  12   5    2046     400
   0 -12  -5    2062     470
   0 -12  -5    3434     520
   0  12   5    2459     550
   0  12   5    2380     440
  -1 -12  -5    2593     470
  -1 -12  -5    2928     520
   1  12   5    2505     460
   1  12   5    1727     540
  -2 -12  -5    3361     490
   2  12   5    2444     470
   2  12   5    3014     570
   3  12   5       7     490
   3  12   5     406     440
   4  12   5     651     510
   4  12   5       2     420
   5  12   5     239     460
   5  12   5     212     560
   4 -13  -5     269     460
   4 -13  -5      10     430
   3 -13  -5      75     400
   3 -13  -5     653     480
   2 -13  -5       7     440
   2 -13  -5       7     440
   1 -13  -5      87     470
   1 -13  -5     652     470
  -1 -13  -5      86     460
  -1 -13  -5      64     410
   1  13   5     411     530
   1  13   5       9     370
  -2 -13  -5     682     420
   2  13   5       7     490
   2  13   5       7     380
   3  13   5       7     440
   3  13   5       7     460
   4  13   5      10     480
   4  13   5      10     570
   0 -14  -5     819     500
   0  14   5     892     610
   0 -14   6       0     470
   4  13  -6       2     480
   4  13  -6     351     580
   3  13  -6       6     540
   3  13  -6     250     450
   2  13  -6     178     520
   2  13  -6      83     400
  -2 -13   6     204     420
  -2 -13   6     258     400
   1  13  -6     784     400
   1  13  -6     416     510
  -1 -13   6     724     440
  -1 -13   6    1342     460
  -1  13  -6    1143     560
   1 -13   6     964     450
   1 -13   6     954     460
  -2  13  -6     647     520
   2 -13   6       3     410
   2 -13   6     553     460
   3 -13   6     237     420
   3 -13   6       6     440
   4 -13   6     122     430
   4 -13   6     242     470
   5  12  -6       1     430
   5  12  -6       1     520
   4  12  -6     274     430
   4  12  -6     461     540
   3  12  -6      87     500
   3  12  -6      55     380
   2  12  -6     687     450
   2  12  -6       4     380
  -2 -12   6       4     370
  -2 -12   6     370     370
   1  12  -6      42     330
   1  12  -6       4     480
  -1 -12   6       4     380
  -1 -12   6       2     380
   0  12  -6    1942     550
   0  12  -6    1003     350
   0 -12   6    1645     460
   0 -12   6    1695     440
  -1  12  -6       2     490
  -1  12  -6       4     280
   1 -12   6       7     390
   1 -12   6     238     390
  -2  12  -6     177     440
   2 -12   6       4     370
   2 -12   6     358     420
   3 -12   6       0     400
   3 -12   6     528     400
   4 -12   6       0     370
   4 -12   6     104     410
   5 -12   6       1     410
   5 -12   6       1     410
   6  11  -6     753     510
   6  11  -6       0     490
   5  11  -6     506     450
   5  11  -6     724     500
   4  11  -6     153     490
   4  11  -6      55     370
   3  11  -6     260     480
   3  11  -6     297     370
  -3 -11   6     964     360
   2  11  -6     351     320
   2  11  -6       6     420
  -2 -11   6     340     330
  -2 -11   6       6     320
   1  11  -6     957     340
   1  11  -6    1295     470
  -1 -11   6     889     360
  -1 -11   6    1092     380
  -1  11  -6     580     460
  -1  11  -6    1276     290
   1 -11   6     956     410
   1 -11   6     628     360
  -2  11  -6       6     230
  -2  11  -6       6     420
   2 -11   6       6     340
   2 -11   6       6     350
   2 -11   6       6     220
   3 -11   6     241     260
   3 -11   6     529     390
   3 -11   6     521     400
   4 -11   6      37     370
   4 -11   6      37     280
   4 -11   6      37     380
   5 -11   6       4     400
   5 -11   6     609     390
   5 -11   6     105     330
   6 -11   6     262     420
   6 -11   6       0     340
   6 -11   6     221     420
   7 -11   6     974     460
   7  10  -6     421     490
   7  10  -6     966     510
   6  10  -6     344     450
   6  10  -6     227     440
   5  10  -6     751     410
   5  10  -6     483     460
   4  10  -6     647     390
   4  10  -6     657     460
  -4 -10   6     823     320
   3  10  -6    1449     470
   3  10  -6    1921     390
  -3 -10   6    2249     380
   2  10  -6    1274     450
   2  10  -6     302     300
  -2 -10   6     444     340
  -2 -10   6     197     320
   1  10  -6    1916     330
   1  10  -6    3190     530
  -1 -10   6    2142     400
  -1 -10   6    2544     400
   0  10  -6     700     280
   0  10  -6     191     370
   0 -10   6     919     350
   0 -10   6     191     130
   0 -10   6     416     320
  -1  10  -6    1393     410
  -1  10  -6    1631     290
   1 -10   6    1973     240
   1 -10   6    2210     370
   1 -10   6    2683     410
  -2  10  -6     592     230
  -2  10  -6      99     390
   2 -10   6     547     230
   2 -10   6     629     370
   2 -10   6     961     360
   3 -10   6    1231     340
   3 -10   6    1145     380
   3 -10   6     954     280
   4 -10   6     678     370
   4 -10   6     425     290
   4 -10   6     590     380
   5 -10   6     676     380
   5 -10   6     437     320
   5 -10   6    1015     390
   6 -10   6       1     370
   6 -10   6      16     340
   6 -10   6     423     380
   7 -10   6     202     380
   7 -10   6     931     410
   7 -10   6    1147     410
   8   9  -6      18     440
   8   9  -6      18     440
   7   9  -6      94     430
   7   9  -6     665     450
   6   9  -6    1196     430
   6   9  -6     789     420
   5   9  -6    4440     590
   5   9  -6    3883     510
   4   9  -6    2422     460
   4   9  -6    3580     430
  -4  -9   6    4020     380
   3   9  -6     233     310
   3   9  -6     331     390
  -3  -9   6     389     290
   2   9  -6     649     300
   2   9  -6       8     350
  -2  -9   6      24     280
  -2  -9   6     178     290
   1   9  -6     776     280
   1   9  -6     895     380
  -1  -9   6    1119     320
  -1  -9   6     592     280
  -1   9  -6     751     230
  -1   9  -6     987     390
   1  -9   6    1008     190
   1  -9   6     359     310
   1  -9   6     589     300
  -2   9  -6     227     370
  -2   9  -6      24     190
   2  -9   6      89     310
   2  -9   6     603     310
   2  -9   6       8     210
  -3   9  -6      13     150
   3  -9   6     218     340
   3  -9   6      13     230
   3  -9   6      95     310
   4  -9   6    3244     430
   4  -9   6    3115     400
   4  -9   6    2747     360
   5  -9   6    4500     520
   5  -9   6    3533     450
   5  -9   6    3133     460
   6  -9   6    1382     400
   6  -9   6     489     350
   6  -9   6    1048     380
   7  -9   6     115     380
   7  -9   6     405     350
   7  -9   6      16     370
   8  -9   6      18     340
   8  -9   6     412     390
   8  -9   6      65     380
   9   8  -6     522     480
   9   8  -6     570     500
   8   8  -6       5     390
   8   8  -6     197     410
   7   8  -6    3400     560
   7   8  -6    3251     560
   6   8  -6    6958     640
   6   8  -6    7149     580
   5   8  -6    2150     450
   5   8  -6    2296     400
  -5  -8   6    2625     330
   4   8  -6    3480     410
   4   8  -6    3018     440
  -4  -8   6    4108     370
   3   8  -6     557     310
   3   8  -6     287     340
  -3  -8   6     841     270
   2   8  -6    1459     290
   2   8  -6    1250     360
  -2  -8   6    1656     310
  -2  -8   6    1365     270
   1   8  -6   17857     900
   1   8  -6   19900     780
  -1  -8   6   19648     860
  -1  -8   6   19091     800
   0   8  -6   10998     540
   0   8  -6    9474     670
   0  -8   6   10307     580
   0  -8   6   10432     630
   0  -8   6    9177     440
  -1   8  -6   19911     730
  -1   8  -6   18919     880
   1  -8   6   19972     810
   1  -8   6   20094     880
   1  -8   6   17876     730
  -2   8  -6    1022     310
  -2   8  -6    1513     200
   2  -8   6    1315     300
   2  -8   6     917     230
   2  -8   6    1958     340
  -3   8  -6     260     140
   3  -8   6     643     250
   3  -8   6     680     300
   3  -8   6     775     300
   4  -8   6    3731     410
   4  -8   6    3553     390
   4  -8   6    3333     410
   5  -8   6    2444     410
   5  -8   6    2207     390
   5  -8   6    2153     400
   6  -8   6    5835     510
   6  -8   6    6368     550
   6  -8   6    7577     550
   7  -8   6    2976     480
   7  -8   6    4809     520
   7  -8   6    3032     510
   8  -8   6       5     340
   8  -8   6      56     380
   8  -8   6     113     320
   9  -8   6     438     340
   9  -8   6     227     410
   9  -8   6     400     430
   9   7  -6     208     440
   9   7  -6     330     450
   8   7  -6     328     410
   8   7  -6     358     410
   7   7  -6    4441     550
   7   7  -6    4595     530
   6   7  -6    1308     380
   6   7  -6    1703     360
   5   7  -6    3161     460
   5   7  -6    3334     430
  -5  -7   6    2577     290
   4   7  -6    4841     440
   4   7  -6    4884     470
  -4  -7   6    5107     360
   3   7  -6      19     220
   3   7  -6      19     240
  -3  -7   6     481     220
   2   7  -6     854     310
   2   7  -6     772     260
   2   7  -6    1580     230
  -2  -7   6    1293     260
  -2  -7   6     981     240
   1   7  -6       1     160
   1   7  -6       1     260
   1   7  -6     293     200
  -1  -7   6       1     180
  -1  -7   6       1     220
  -1   7  -6      42     240
  -1   7  -6     347     150
   1  -7   6     347     240
   1  -7   6     273     210
  -2   7  -6     706     290
  -2   7  -6    1132     160
   2  -7   6    1114     280
   2  -7   6    1150     270
  -3   7  -6      19     100
   3  -7   6      19     240
   3  -7   6     391     250
   4  -7   6    4652     420
   4  -7   6    4374     410
   5  -7   6    2755     390
   5  -7   6    2621     380
   5  -7   6    2277     370
   6  -7   6    1361     370
   6  -7   6    1716     340
   6  -7   6    2072     390
   7  -7   6    4310     500
   7  -7   6    4259     510
   7  -7   6    4300     430
   8  -7   6     518     370
   8  -7   6      95     360
   8  -7   6     144     280
   9  -7   6     364     400
   9  -7   6     339     400
   9  -7   6     209     290
  10   6  -6     261     450
  10   6  -6     229     420
   9   6  -6     348     400
   9   6  -6     174     400
   9   6  -6       0     280
   8   6  -6    1685     450
   8   6  -6    1467     290
   8   6  -6    1725     440
   7   6  -6    3582     330
   7   6  -6    3101     450
   7   6  -6    3833     500
   6   6  -6       5     310
   6   6  -6     171     330
   6   6  -6       1     180
  -6  -6   6      87     150
   5   6  -6   11884     690
   5   6  -6   12129     520
   5   6  -6   10600     710
  -5  -6   6   11648     550
   4   6  -6    8041     520
   4   6  -6    7002     500
   4   6  -6    6858     390
  -4  -6   6    8071     420
   3   6  -6   46102    1550
   3   6  -6   45420    1620
   3   6  -6   43848    1740
  -3  -6   6   47606    1650
   2   6  -6   92828    3150
   2   6  -6   90132    2950
   2   6  -6   90791    3020
   2   6  -6   86756    3230
  -2  -6   6   92149    2970
  -2  -6   6   92089    3150
   1   6  -6   16705     650
   1   6  -6   17660     630
   1   6  -6   17762     590
   1   6  -6   18408     560
  -1  -6   6   18453     640
  -1  -6   6   17740     570
   0   6  -6   26953    1150
   0   6  -6   25675    1280
   0   6  -6   26829    1250
   0   6  -6   27113    1150
   0  -6   6   26296    1170
   0  -6   6   26544    1250
  -1   6  -6   17641     580
  -1   6  -6   17256     520
  -1   6  -6   17199     640
  -1   6  -6   18343     660
   1  -6   6   16699     580
   1  -6   6   17335     640
  -2   6  -6   99574    3300
  -2   6  -6   89442    3320
  -2   6  -6   91391    3030
   2  -6   6   94866    3290
   2  -6   6   90830    3100
   2  -6   6  100135    3300
   3  -6   6   49297    1700
   3  -6   6   44717    1690
   3  -6   6   43680    1600
   4  -6   6    6993     470
   4  -6   6    9573     510
   4  -6   6    7992     510
   5  -6   6   12721     650
   5  -6   6   10925     630
   5  -6   6   11975     660
   6  -6   6      39     240
   6  -6   6       5     250
   6  -6   6     309     240
   7  -6   6    2792     410
   7  -6   6    3184     450
   7  -6   6    4129     410
   8  -6   6    2326     340
   8  -6   6    1416     370
   8  -6   6    2197     440
   9  -6   6     895     390
   9  -6   6     161     260
   9  -6   6     161     360
  10  -6   6     413     270
  10  -6   6     285     400
  10  -6   6     623     410
  10   5  -6    1084     380
  10   5  -6     727     360
  10   5  -6    1038     470
  10   5  -6    1177     490
   9   5  -6    7745     570
   9   5  -6    8169     700
   9   5  -6    8189     600
   9   5  -6    7462     650
   8   5  -6   16097     950
   8   5  -6   17166     830
   8   5  -6   17285     920
   8   5  -6   17622     810
   7   5  -6    2131     380
   7   5  -6    2849     430
   7   5  -6    2347     310
   6   5  -6   10610     520
   6   5  -6   10500     640
   6   5  -6   10278     660
  -6  -5   6    9987     420
   5   5  -6    8733     560
   5   5  -6    8949     580
   5   5  -6    7976     430
   5   5  -6    9028     460
  -5  -5   6    8674     420
   4   5  -6    1495     290
   4   5  -6    2136     220
   4   5  -6    2166     290
   4   5  -6    2536     190
  -4  -5   6    2346     220
   3   5  -6   17361     630
   3   5  -6   15868     710
   3   5  -6   17194     590
  -3  -5   6   16421     630
   2   5  -6   26818    1040
   2   5  -6   25916    1120
   2   5  -6   27144    1200
  -2  -5   6   26529    1060
  -2  -5   6   26148    1120
  -2  -5   6   28962    1130
   1   5  -6    6106     280
   1   5  -6    6211     320
   1   5  -6    6952     340
   1   5  -6    5766     340
  -1  -5   6    6246     320
  -1  -5   6    6906     330
  -1  -5   6    6047     290
  -1   5  -6    6622     260
  -1   5  -6    6853     310
  -1   5  -6    6841     370
  -1   5  -6    5925     360
   1  -5   6    7060     370
   1  -5   6    6968     330
   1  -5   6    5773     350
  -2   5  -6   27069    1170
  -2   5  -6   27405    1090
  -2   5  -6   26622    1000
  -2   5  -6   27256    1160
   2  -5   6   26417    1160
   2  -5   6   26119    1090
   2  -5   6   28805    1160
  -3   5  -6   16797     690
   3  -5   6   17069     670
   3  -5   6   17466     700
   3  -5   6   16556     680
   3  -5   6   18374     690
   4  -5   6    2962     290
   4  -5   6    2272     300
   4  -5   6    2492     300
   5  -5   6    8085     500
   5  -5   6    8714     510
   5  -5   6    8998     520
   6  -5   6   10719     550
   6  -5   6    9613     580
   6  -5   6    9935     560
   7  -5   6    2266     390
   7  -5   6    2440     310
   8  -5   6   16860     970
   8  -5   6   18822     920
   8  -5   6   15612     780
   9  -5   6    7471     510
   9  -5   6    7663     720
   9  -5   6    8148     670
  10  -5   6    1264     420
  10  -5   6     830     270
  10  -5   6    1591     490
  10   4  -6      20     340
  10   4  -6     463     310
  10   4  -6     550     390
  10   4  -6     612     330
   9   4  -6     459     390
   9   4  -6     735     320
   9   4  -6     727     390
   9   4  -6    1265     360
   8   4  -6    3915     470
   8   4  -6    3221     340
   8   4  -6    2459     400
   8   4  -6    3015     340
   7   4  -6    5588     480
   7   4  -6    5755     400
   7   4  -6    5521     380
   7   4  -6    5987     460
   6   4  -6    1320     330
   6   4  -6     705     250
   6   4  -6     832     350
  -6  -4   6    1327     160
  -6  -4   6    1094     150
   5   4  -6    2020     300
   5   4  -6    2733     410
  -5  -4   6    2212     240
  -5  -4   6    1859     220
   4   4  -6     371     160
   4   4  -6     598     170
   4   4  -6     585     270
  -4  -4   6     598     160
  -4  -4   6     585     160
   3   4  -6   12964     640
   3   4  -6   14924     740
   3   4  -6   15693     610
   3   4  -6   14588     610
  -3  -4   6   14531     640
  -3  -4   6   15196     710
   2   4  -6   21364     570
   2   4  -6   19349     610
   2   4  -6   21421     680
  -2  -4   6   21444     620
  -2  -4   6   20732     550
   1   4  -6   52463    1150
   1   4  -6   51327    1240
   1   4  -6   52511    1290
  -1  -4   6   50698    1270
  -1  -4   6   52559    1160
   0   4  -6   23613    1420
   0   4  -6   22061    1440
   0   4  -6   23931    1320
   0  -4   6   24842    1430
   0  -4   6   22308    1320
   0  -4   6   22978    1440
  -1   4  -6   51515    1290
  -1   4  -6   53820    1200
  -1   4  -6   52494    1160
  -1   4  -6   51805    1280
   1  -4   6   51697    1200
   1  -4   6   53700    1290
   1  -4   6   54446    1290
  -2   4  -6   20304     600
  -2   4  -6   19993     510
  -2   4  -6   21604     670
  -2   4  -6   20397     650
   2  -4   6   20753     650
   2  -4   6   21144     650
   2  -4   6   22440     620
  -3   4  -6   13200     690
  -3   4  -6   14938     670
   3  -4   6   14461     690
   3  -4   6   15679     710
   3  -4   6   15107     680
  -4   4  -6     458     210
   4  -4   6     548     210
   4  -4   6     452     200
   4  -4   6     503     220
   4  -4   6     674     230
   5  -4   6    1880     330
   5  -4   6    2107     310
   5  -4   6    2293     330
   6  -4   6     916     230
   6  -4   6     794     240
   6  -4   6     390     270
   7  -4   6    5374     340
   7  -4   6    5607     360
   7  -4   6    5095     430
   8  -4   6    2914     410
   8  -4   6    2926     420
   8  -4   6    2764     280
   9  -4   6     642     230
   9  -4   6     492     390
   9  -4   6    1201     420
  10  -4   6     913     400
  10  -4   6     650     380
  10  -4   6     807     210
  11   3  -6    2542     480
  11   3  -6    2463     490
  11   3  -6    3194     560
  11   3  -6    2384     420
  10   3  -6    3644     520
  10   3  -6    2781     450
  10   3  -6    3411     440
  10   3  -6    3756     470
   9   3  -6    5564     500
   9   3  -6    4852     490
   9   3  -6    4821     460
   9   3  -6    4158     500
   8   3  -6     248     320
   8   3  -6     225     280
   8   3  -6     467     260
   8   3  -6     304     300
   7   3  -6    7729     550
   7   3  -6    7331     490
   7   3  -6    7530     440
   6   3  -6    4260     470
   6   3  -6    3969     420
   6   3  -6    4469     390
   5   3  -6   24396     730
   5   3  -6   24636     820
   5   3  -6   22884     630
  -5  -3   6   23308     630
   4   3  -6   46208    2010
   4   3  -6   48082    2150
   4   3  -6   50309    2070
   3   3  -6   17281     500
   3   3  -6   16432     400
   3   3  -6   17963     410
  -3  -3   6   17616     410
  -3  -3   6   17736     470
   2   3  -6    1429     110
   2   3  -6    1429     150
   2   3  -6    1429      80
  -2  -3   6    1429      40
  -2  -3   6    1117      90
  -2  -3   6     846      90
   1   3  -6    9435     670
   1   3  -6   11134     610
   1   3  -6   11923     720
  -1  -3   6   11594     700
  -1  -3   6   11266     610
  -1   3  -6   11380     690
  -1   3  -6   10053     680
  -1   3  -6   10594     630
   1  -3   6   11669     680
   1  -3   6   10315     680
   1  -3   6   11036     640
  -2   3  -6    1425     140
  -2   3  -6     562     130
  -2   3  -6    1425     120
   2  -3   6    1425     130
   2  -3   6    1425     130
   2  -3   6    1425     130
  -3   3  -6   17471     440
  -3   3  -6   16596     450
   3  -3   6   18139     460
   3  -3   6   18059     460
   3  -3   6   18126     450
  -4   3  -6   50151    2170
   4  -3   6   52505    2180
   4  -3   6   50044    2100
   4  -3   6   51943    2210
  -5   3  -6   23883     720
   5  -3   6   23574     720
   5  -3   6   24089     760
   5  -3   6   23482     600
   5  -3   6   24009     720
   6  -3   6    4111     370
   6  -3   6    4680     390
   6  -3   6    4588     490
   6  -3   6    4345     290
   7  -3   6    8656     400
   7  -3   6    7821     400
   7  -3   6    8129     530
   7  -3   6    7047     330
   8  -3   6     164     190
   8  -3   6     127     320
   8  -3   6     157     160
   9  -3   6    4176     550
   9  -3   6    4563     350
   9  -3   6    4594     500
  10  -3   6    3625     280
  10  -3   6    3068     500
  10  -3   6    2743     510
  11  -3   6    2925     510
  11  -3   6    2748     560
  11   2  -6     109     340
  11   2  -6     718     400
  11   2  -6     189     370
  11   2  -6     109     380
  10   2  -6     148     340
  10   2  -6     156     340
  10   2  -6      54     320
  10   2  -6     108     300
   9   2  -6    1538     350
   9   2  -6    1359     380
   9   2  -6    1152     330
   9   2  -6    2032     390
   8   2  -6    1003     260
   8   2  -6     295     310
   8   2  -6     698     290
   8   2  -6     110     260
   7   2  -6   13976     810
   7   2  -6   13186     720
   7   2  -6   14103     850
   6   2  -6    4726     350
   6   2  -6    4132     290
   6   2  -6    4061     250
   5   2  -6    4438     310
   5   2  -6    5489     420
   5   2  -6    5567     470
   5   2  -6    5559     510
  -5  -2   6    4984     300
   4   2  -6   16070     500
   4   2  -6   15686     440
   4   2  -6   14175     350
  -4  -2   6   15095     350
   3   2  -6     415     120
   3   2  -6     265     210
   3   2  -6     319     160
  -3  -2   6     395     120
  -3  -2   6     294     160
   2   2  -6   40482     350
   2   2  -6   40034     400
   2   2  -6   41656     350
  -2  -2   6   40750     350
  -2  -2   6   41809     350
   1   2  -6  303518   18738
   1   2  -6  320322   17618
   1   2  -6  312243   19018
  -1  -2   6  317425   17638
  -1  -2   6  310758   18708
  -1  -2   6  315702   18868
   0   2  -6    5054    1070
   0   2  -6    5451    1070
   0   2  -6    5288     980
   0  -2   6    5669     980
   0  -2   6    5955    1070
   0  -2   6    4785    1070
  -1   2  -6  319107   19098
  -1   2  -6  303538   18978
  -1   2  -6  310351   17808
  -1   2  -6  316831   17958
   1  -2   6  314107   17958
   1  -2   6  328406   19148
   1  -2   6  331627   19018
  -2   2  -6   40899     360
  -2   2  -6   41341     380
  -2   2  -6   40877     280
   2  -2   6   41253     290
   2  -2   6   40943     370
   2  -2   6   41319     380
   2  -2   6   41165     380
  -3   2  -6     345     160
  -3   2  -6     434     150
   3  -2   6     509     150
   3  -2   6     408     180
   3  -2   6     299     160
   3  -2   6     379      90
  -4   2  -6   14483     400
   4  -2   6   14704     330
   4  -2   6   14911     440
   4  -2   6   14600     400
  -5   2  -6    4823     400
   5  -2   6    5843     500
   5  -2   6    5272     360
   5  -2   6    5490     410
   6  -2   6    3902     190
   6  -2   6    4393     210
   6  -2   6    4058     210
   6  -2   6    3456     300
   7  -2   6   13108     660
   7  -2   6   13371     640
   7  -2   6   13943     660
   7  -2   6   14315     800
   8  -2   6     466     280
   8  -2   6     358     150
   8  -2   6     630     190
   9  -2   6    1137     410
   9  -2   6    1645     400
   9  -2   6    1259     180
   9  -2   6    1296     250
  10  -2   6      33     360
  10  -2   6     108     340
  11  -2   6       0     390
  11  -2   6     612     420
  11   1  -6     443     400
  11   1  -6     614     420
  11   1  -6     614     350
  11   1  -6     470     370
  10   1  -6     874     330
  10   1  -6    1269     390
  10   1  -6    1082     350
  10   1  -6    1348     390
   9   1  -6     147     300
   9   1  -6     347     290
   9   1  -6     391     280
   9   1  -6     566     340
   8   1  -6    9060     660
   8   1  -6    8992     560
   8   1  -6   10504     650
   7   1  -6    7491     520
   7   1  -6    6484     450
   6   1  -6    4610     380
   6   1  -6    3784     410
   5   1  -6    2078     330
   5   1  -6    1754     180
   5   1  -6    2056     290
  -5  -1   6    1733     160
   4   1  -6      19     180
   4   1  -6      83      90
   4   1  -6      93     130
  -4  -1   6      63      80
   3   1  -6      67     170
   3   1  -6     207     250
   3   1  -6     152     190
  -3  -1   6     120     230
  -3  -1   6      98     160
   2   1  -6     769     270
   2   1  -6     952     380
   2   1  -6     744     310
   2   1  -6     893     340
  -2  -1   6     806     330
  -2  -1   6     931     310
   1   1  -6    9893     200
   1   1  -6   10085     220
  -1  -1   6   10464     190
  -1   1  -6   10075     200
  -1   1  -6   10397     160
  -1   1  -6   10697     170
   1  -1   6   10529     190
   1  -1   6   10529     170
   1  -1   6   10170     160
   1  -1   6   10017     210
  -2   1  -6     806     280
  -2   1  -6     754     330
   2  -1   6     866     340
   2  -1   6     917     330
   2  -1   6    1124     320
   2  -1   6     826     290
  -3   1  -6      81     170
  -3   1  -6      56     200
   3  -1   6     160     200
   3  -1   6     280     260
   3  -1   6      99     170
  -4   1  -6     125     110
   4  -1   6      96     190
   4  -1   6      65     120
   4  -1   6      32     120
  -5   1  -6    1988     240
   5  -1   6    1967     330
   5  -1   6    1827     250
   5  -1   6    1764     240
   6  -1   6    4894     340
   6  -1   6    4815     450
   6  -1   6    4558     310
   7  -1   6    6591     320
   7  -1   6    6179     380
   7  -1   6    6303     320
   7  -1   6    7362     520
   8  -1   6   10932     670
   8  -1   6    9646     420
   8  -1   6    9901     520
   8  -1   6    9783     430
   9  -1   6       2     220
   9  -1   6      36     330
   9  -1   6     480     360
  10  -1   6    1662     410
  10  -1   6    1080     410
  11  -1   6       7     390
  11  -1   6     345     360
  11  -1   6     267     420
  11   0  -6    1926     500
  11   0  -6    1848     490
  11   0  -6    1501     420
  11   0  -6    1433     410
  10   0  -6    1582     400
  10   0  -6    1816     430
  10   0  -6    1304     340
  10   0  -6    1304     330
   9   0  -6       3     260
   9   0  -6     431     340
   8   0  -6     888     260
   8   0  -6     124     310
   7   0  -6     129     260
   7   0  -6      41     210
   6   0  -6   14699     520
   6   0  -6   15834     600
   6   0  -6   15010     400
   5   0  -6   25073    1290
   5   0  -6   23712    1290
   5   0  -6   24380    1410
   4   0  -6   38438     780
   4   0  -6   38031     700
   4   0  -6   37637     690
  -4   0   6   39975     680
   3   0  -6  115451    5959
   3   0  -6  118978    5639
   3   0  -6  121207    6069
  -3   0   6  122748    5959
  -3   0   6  119911    5649
  -3   0   6  119179    6069
   2   0  -6     410     670
   2   0  -6     409     700
   2   0  -6     405     620
  -2   0   6     372     670
  -2   0   6     379     630
  -2   0   6     438     700
   1   0  -6    5319     810
   1   0  -6    5899     890
  -1   0   6    5706     910
  -1   0   6    5332     890
  -1   0   6    5563     810
   0   0  -6  597225    8329
   0   0  -6  613954    8039
   0   0   6  622912    7989
   0   0   6  647195    8389
  -1   0  -6    5686     840
  -1   0  -6    5782     890
   1   0   6    5543     840
   1   0   6    5408     900
  -2   0  -6     392     640
  -2   0  -6     414     670
   2   0   6     402     670
   2   0   6     414     640
  -3   0  -6  118341    5979
  -3   0  -6  122343    5719
   3   0   6  121513    5989
   3   0   6  118341    5719
  -4   0  -6   39270     710
   4   0   6   39200     720
   4   0   6   40482     770
   4   0   6   39186     710
  -5   0  -6   24462    1290
   5   0   6   24980    1310
   5   0   6   24709    1350
   5   0   6   23581    1290
   6   0   6   16274     520
   6   0   6   16784     450
   6   0   6   16155     600
   7   0   6     273     100
   7   0   6     218     190
   7   0   6     325     100
   7   0   6      41     250
   8   0   6     423     310
   8   0   6     202     220
   9   0   6     342     270
   9   0   6       2     310
   9   0   6      61     240
  10   0   6    1802     440
  10   0   6    1834     440
  10   0   6    2026     380
  10   0   6    1351     310
  11   0   6    1894     510
  11   0   6    1684     430
  11   0   6    1676     490
  11  -1  -6     579     430
  11  -1  -6     843     370
  10  -1  -6     933     310
  10  -1  -6    1476     430
  10  -1  -6    1170     340
   9  -1  -6     321     280
   9  -1  -6     521     340
   8  -1  -6    9429     580
   8  -1  -6   10028     390
   8  -1  -6   10402     690
   8  -1  -6    8997     400
   7  -1  -6    6238     290
   7  -1  -6    7081     530
   7  -1  -6    6177     300
   7  -1  -6    6763     470
   6  -1  -6    3986     440
   6  -1  -6    4267     280
   6  -1  -6    4074     380
   5  -1  -6    1733     230
   5  -1  -6    2503     370
   5  -1  -6    1957     290
  -5   1   6    1809     230
  -5   1   6    1957     290
   4  -1  -6      56     120
   4  -1  -6     241     160
   4  -1  -6      43     150
  -4   1   6       4     180
  -4   1   6     364      70
   3  -1  -6     126     220
   3  -1  -6     101     210
   3  -1  -6     225     270
   3  -1  -6      81     200
  -3   1   6      68     190
  -3   1   6     161     210
   2  -1  -6     922     330
   2  -1  -6     919     330
   2  -1  -6     974     350
   2  -1  -6     919     310
  -2   1   6     919     310
  -2   1   6     324     320
  -2   1   6     834     320
   1  -1  -6    9790     200
   1  -1  -6   10867     180
   1  -1  -6   10306     220
   1  -1  -6   10363     210
  -1   1   6   10756     180
  -1   1   6   10363     210
  -1   1   6   10663     190
  -1  -1  -6   10541     200
  -1  -1  -6   10820     150
  -1  -1  -6   10353     200
   1   1   6   10258     200
   1   1   6   10296     210
   1   1   6   10894     150
  -2  -1  -6     904     330
  -2  -1  -6     807     320
   2   1   6     823     320
   2   1   6     716     340
   2   1   6     925     290
  -3  -1  -6      99     200
  -3  -1  -6     124     180
   3   1   6     126     180
   3   1   6      76     210
   3   1   6     207     200
  -4  -1  -6      74      90
  -4  -1  -6     309      70
   4   1   6      63     150
   4   1   6     127     140
   4   1   6     120      90
  -5  -1  -6    1702     190
   5   1   6    2002     200
   5   1   6    1654     290
   5   1   6    1855     280
   6   1   6    4366     240
   6   1   6    4366     380
   6   1   6    4410     390
   6   1   6    4516     430
   7   1   6    6925     510
   7   1   6    7212     450
   7   1   6    6585     450
   8   1   6   10270     660
   8   1   6   10084     590
   8   1   6   10153     610
   9   1   6     324     280
   9   1   6     703     340
   9   1   6     730     280
  10   1   6    1332     340
  10   1   6    1332     360
  10   1   6    2380     460
  10   1   6     811     410
  11   1   6     665     440
  11   1   6     592     410
  11  -2  -6     238     350
  11  -2  -6     148     410
  10  -2  -6       7     290
  10  -2  -6       7     360
  10  -2  -6       3     260
   9  -2  -6    1658     190
   9  -2  -6    1375     340
   9  -2  -6    2429     460
   8  -2  -6     455     150
   8  -2  -6     297     260
   8  -2  -6     246     310
   7  -2  -6   14265     660
   7  -2  -6   14156     650
   7  -2  -6   12931     740
   7  -2  -6   13203     840
   6  -2  -6    4296     330
   6  -2  -6    3747     200
   6  -2  -6    4157     240
   6  -2  -6    4002     270
   5  -2  -6    5442     520
   5  -2  -6    5929     430
   5  -2  -6    5473     450
   5  -2  -6    4783     400
  -5   2   6    5575     450
  -5   2   6    5208     400
   4  -2  -6   15676     500
   4  -2  -6   15008     410
   4  -2  -6   14737     430
   4  -2  -6   15072     410
  -4   2   6   15266     410
  -4   2   6   16060     430
   3  -2  -6     409     150
   3  -2  -6     349     160
   3  -2  -6     274     200
   3  -2  -6     300     170
  -3   2   6     362     160
   2  -2  -6   41459     410
   2  -2  -6   41017     390
   2  -2  -6   43049     370
   2  -2  -6   41635     370
  -2   2   6   40594     400
  -2   2   6   41459     370
  -2   2   6   41172     360
  -2   2   6   42746     380
   1  -2  -6  297998   18738
   1  -2  -6  298678   18528
   1  -2  -6  310253   17628
   1  -2  -6  311281   17508
  -1   2   6  302466   17668
  -1   2   6  326067   17598
  -1   2   6  316880   18738
   0  -2  -6    6054     990
   0  -2  -6    5355    1050
   0  -2  -6    5931     990
   0  -2  -6    5541    1040
   0   2   6    5437     990
   0   2   6    5282    1040
   0   2   6    6373     990
  -1  -2  -6  309635   18378
  -1  -2  -6  312485   18218
  -1  -2  -6  257236   17348
   1   2   6  300527   17458
   1   2   6  313183   18208
   1   2   6  309672   17278
   1   2   6  311654   18388
  -2  -2  -6   40964     360
  -2  -2  -6   40475     350
  -2  -2  -6   41933     360
   2   2   6   40876     350
   2   2   6   43125     380
   2   2   6   41142     360
  -3  -2  -6     270     140
  -3  -2  -6     280     150
   3   2   6     341     130
   3   2   6     307     150
   3   2   6     485     170
  -4  -2  -6   15647     440
  -4  -2  -6   15210     380
   4   2   6   15016     380
   4   2   6   16414     460
   4   2   6   16783     440
  -5  -2  -6    5835     360
   5   2   6    5748     450
   5   2   6    5560     470
   5   2   6    5537     360
   6   2   6    4198     140
   6   2   6    4128     260
   6   2   6    4240     280
   7   2   6   13639     780
   7   2   6   15358     820
   7   2   6   14457     780
   8   2   6     560     310
   8   2   6     430     260
   8   2   6      12     240
   9   2   6    1293     390
   9   2   6    1143     350
   9   2   6    1181     330
  10   2   6      13     320
  10   2   6       7     340
  10   2   6       7     280
  10   2   6       7     320
  11   2   6       0     310
  11   2   6     421     390
  11   2   6     271     380
  11  -3  -6    2876     570
  11  -3  -6    3073     490
  10  -3  -6    3069     520
  10  -3  -6    3292     450
   9  -3  -6    4467     330
   9  -3  -6    4508     550
   9  -3  -6    4478     460
   8  -3  -6     112     180
   8  -3  -6       3     260
   8  -3  -6      20     310
   7  -3  -6    8020     390
   7  -3  -6    7888     480
   7  -3  -6    7557     410
   7  -3  -6    7712     380
   7  -3  -6    6216     490
   6  -3  -6    4336     510
   6  -3  -6    4236     380
   6  -3  -6    4203     450
   6  -3  -6    5025     390
   5  -3  -6   24692     820
   5  -3  -6   23617     720
   5  -3  -6   22963     730
   5  -3  -6   24726     700
   4  -3  -6   50667    2040
   4  -3  -6   49045    2200
   4  -3  -6   49972    2050
   4  -3  -6   48458    2130
  -4   3   6   50248    2130
  -4   3   6   52238    2050
   3  -3  -6   17290     400
   3  -3  -6   17706     440
   3  -3  -6   16806     470
   3  -3  -6   17518     440
  -3   3   6   17384     440
  -3   3   6   17839     440
  -3   3   6   17933     470
  -3   3   6   17129     410
   2  -3  -6     783     130
   2  -3  -6    1424     130
   2  -3  -6     611     140
   2  -3  -6     811     120
  -2   3   6     950     120
  -2   3   6     667     100
  -2   3   6    1424      60
  -2   3   6     996     130
   1  -3  -6   10244     640
   1  -3  -6   10206     690
   1  -3  -6   10817     680
   1  -3  -6   10934     650
   1  -3  -6   12438     710
  -1   3   6   10244     680
  -1   3   6   11652     680
  -1   3   6   11300     650
  -1   3   6   10709     640
  -1  -3  -6   10109     660
  -1  -3  -6   11954     670
  -1  -3  -6    9840     630
   1   3   6   11758     670
   1   3   6   10148     650
   1   3   6   10132     660
  -2  -3  -6    1423      60
  -2  -3  -6    1423     110
  -2  -3  -6    1048     120
   2   3   6    1423     140
   2   3   6    1423     110
   2   3   6     709     120
  -3  -3  -6   17844     450
  -3  -3  -6   17791     430
  -3  -3  -6   16758     410
   3   3   6   17457     410
   3   3   6   16839     450
   3   3   6   18204     440
  -4  -3  -6   49512    2070
  -4  -3  -6   49841    2100
   4   3   6   48942    2080
   4   3   6   52588    2170
   4   3   6   50670    2100
  -5  -3  -6   24274     660
   5   3   6   24491     760
   5   3   6   23370     660
   5   3   6   23657     750
  -6  -3  -6    4557     260
   6   3   6    4691     280
   6   3   6    4064     430
   6   3   6    4030     450
   7   3   6    8048     480
   7   3   6    6287     430
   8   3   6     235     280
   8   3   6     220     290
   9   3   6    5168     490
   9   3   6    4547     490
   9   3   6    4149     480
   9   3   6    5391     480
  10   3   6    3711     460
  10   3   6    3842     510
  10   3   6    3012     470
  10   3   6    2870     440
  11   3   6    2708     460
  11   3   6    3874     550
  11   3   6    2244     500
  10  -4  -6     660     350
  10  -4  -6     450     210
  10  -4  -6     636     410
   9  -4  -6     245     220
   9  -4  -6     744     410
   9  -4  -6     437     320
   8  -4  -6    2370     390
   8  -4  -6    2205     350
   8  -4  -6    2905     270
   7  -4  -6    6037     450
   7  -4  -6    6070     380
   7  -4  -6    6201     400
   7  -4  -6    6389     380
   7  -4  -6    4836     460
   6  -4  -6     999     250
   6  -4  -6    1036     240
   6  -4  -6    1185     350
   6  -4  -6     941     260
   6  -4  -6     876     280
   5  -4  -6    1754     350
   5  -4  -6    2661     350
   5  -4  -6    1907     290
   5  -4  -6    2396     370
   4  -4  -6     678     240
   4  -4  -6     849     240
   4  -4  -6     520     180
   4  -4  -6     553     250
   3  -4  -6   14009     650
   3  -4  -6   13907     670
   3  -4  -6   14795     700
   3  -4  -6   14103     610
  -3   4   6   14168     690
  -3   4   6   14149     640
  -3   4   6   14252     620
  -3   4   6   14009     670
   2  -4  -6   22871     660
   2  -4  -6   21876     670
   2  -4  -6   22505     700
   2  -4  -6   20440     670
   2  -4  -6   22699     620
  -2   4   6   22631     670
  -2   4   6   21291     640
  -2   4   6   21417     620
   1  -4  -6   52283    1180
   1  -4  -6   49669    1260
   1  -4  -6   51100    1250
   1  -4  -6   51812    1200
  -1   4   6   52368    1190
  -1   4   6   53092    1260
  -1   4   6   53634    1250
   0  -4  -6   22196    1390
   0  -4  -6   22926    1320
   0  -4  -6   22775    1330
   0   4   6   23901    1400
   0   4   6   21455    1400
   0   4   6   22565    1320
   0   4   6   22482    1360
  -1  -4  -6   52346    1210
  -1  -4  -6   53359    1280
  -1  -4  -6   50799    1200
  -1  -4  -6   52419    1260
   1   4   6   54984    1270
   1   4   6   50363    1270
   1   4   6   53203    1220
  -2  -4  -6   19648     610
  -2  -4  -6   19833     620
   2   4   6   20063     620
   2   4   6   21731     630
   2   4   6   21387     620
   2   4   6   21019     630
  -3  -4  -6   14198     650
  -3  -4  -6   14348     670
   3   4   6   15744     700
   3   4   6   15088     660
   3   4   6   14854     700
  -4  -4  -6     792     220
  -4  -4  -6     710     170
   4   4   6     480     170
   4   4   6     505     260
   4   4   6     834     230
  -5  -4  -6    1979     250
   5   4   6    2156     260
   5   4   6    1783     350
   5   4   6    1994     330
  -6  -4  -6     831     160
  -6  -4  -6     824     150
   6   4   6     983     290
   6   4   6     852     160
   6   4   6    1115     330
   7   4   6    5971     440
   7   4   6    6544     450
   8   4   6    2461     340
   8   4   6    2822     380
   9   4   6     765     350
   9   4   6     652     340
   9   4   6     199     330
   9   4   6     871     350
  10   4   6     197     320
  10   4   6     440     360
  10   4   6     296     360
  10   4   6      21     300
  10  -5  -6    1246     280
  10  -5  -6     831     410
  10  -5  -6    1107     450
   9  -5  -6    7562     510
   9  -5  -6    8279     710
   9  -5  -6    6975     600
   8  -5  -6   17982     810
   8  -5  -6   18546     890
   8  -5  -6   16496     940
   7  -5  -6    2499     400
   7  -5  -6    1986     340
   7  -5  -6    2263     300
   6  -5  -6   11414     670
   6  -5  -6   10962     490
   6  -5  -6    9986     550
   6  -5  -6   10127     570
   6  -5  -6   10167     600
   5  -5  -6    8328     420
   5  -5  -6    8475     560
   5  -5  -6    8151     520
   5  -5  -6    8456     510
   4  -5  -6    1961     280
   4  -5  -6    2072     280
   4  -5  -6    2192     290
   4  -5  -6    2433     220
  -4   5   6    2162     220
   3  -5  -6   16241     670
   3  -5  -6   17994     600
   3  -5  -6   16804     680
   3  -5  -6   17076     660
  -3   5   6   16459     680
  -3   5   6   17065     600
   2  -5  -6   27336    1040
   2  -5  -6   26433    1130
   2  -5  -6   26015    1140
   2  -5  -6   26126    1090
  -2   5   6   26033    1120
  -2   5   6   27448    1050
  -2   5   6   26461    1120
   1  -5  -6    6211     300
   1  -5  -6    5790     320
   1  -5  -6    6094     360
   1  -5  -6    6548     300
   1  -5  -6    5977     360
  -1   5   6    6269     290
  -1   5   6    6432     350
  -1   5   6    5567     300
  -1   5   6    6141     300
  -1  -5  -6    5893     320
  -1  -5  -6    6348     340
  -1  -5  -6    6694     330
  -1  -5  -6    5506     330
   1   5   6    6545     330
   1   5   6    6672     250
   1   5   6    5870     350
   1   5   6    7087     350
   1   5   6    5482     330
  -2  -5  -6   28755    1110
  -2  -5  -6   26646    1130
  -2  -5  -6   27075    1150
   2   5   6   27345    1130
   2   5   6   25184    1080
   2   5   6   27159    1110
   2   5   6   26981    1160
  -3  -5  -6   17409     660
  -3  -5  -6   17900     690
   3   5   6   17357     650
   3   5   6   16741     700
   3   5   6   18286     700
  -4  -5  -6    2539     280
  -4  -5  -6    2389     230
   4   5   6    2359     230
   4   5   6    1949     280
   4   5   6    2129     270
  -5  -5  -6    9194     440
   5   5   6    9017     550
   5   5   6    9017     550
   5   5   6    9076     450
  -6  -5  -6   10445     450
   6   5   6   10736     460
   6   5   6    9680     600
   6   5   6    9851     630
   7   5   6    2555     370
   7   5   6    2862     390
   8   5   6   16793     900
   8   5   6   18973     930
   9   5   6    7812     630
   9   5   6    7387     630
   9   5   6    8075     650
  10   5   6    1113     440
  10   5   6     984     400
  10   5   6     800     410
  10   5   6    1523     390
  10  -6  -6     742     280
  10  -6  -6      53     380
  10  -6  -6       1     420
   9  -6  -6       0     340
   9  -6  -6     736     280
   9  -6  -6     473     390
   8  -6  -6    2203     340
   8  -6  -6    1926     440
   8  -6  -6    1153     370
   7  -6  -6    2975     360
   7  -6  -6    3005     430
   7  -6  -6    2935     410
   6  -6  -6      78     270
   6  -6  -6     249     300
   6  -6  -6     145     180
   6  -6  -6      94     250
   6  -6  -6       5     240
   5  -6  -6   12087     660
   5  -6  -6   11773     690
   5  -6  -6   14021     690
   5  -6  -6   11733     650
   5  -6  -6   12195     540
   4  -6  -6    6612     470
   4  -6  -6    7928     500
   4  -6  -6    6458     480
   4  -6  -6    7671     360
  -4   6   6    7414     380
   3  -6  -6   43729    1650
   3  -6  -6   45034    1590
   3  -6  -6   46062    1520
   3  -6  -6   44915    1660
  -3   6   6   44757    1530
   2  -6  -6   90150    3230
   2  -6  -6   90751    3070
   2  -6  -6   98716    3050
   2  -6  -6   93349    3240
  -2   6   6   90958    3230
  -2   6   6   93103    3040
   1  -6  -6   18980     590
   1  -6  -6   16749     610
   1  -6  -6   18415     570
   1  -6  -6   17283     640
  -1   6   6   16350     660
  -1   6   6   17793     570
  -1   6   6   17158     580
   0  -6  -6   27908    1170
   0  -6  -6   25386    1240
   0  -6  -6   24916    1180
   0   6   6   26468    1270
   0   6   6   26015    1240
   0   6   6   26273    1170
   0   6   6   27837    1180
  -1  -6  -6   17482     630
  -1  -6  -6   18139     630
   1   6   6   17935     630
   1   6   6   17596     650
   1   6   6   17868     540
   1   6   6   18828     620
  -2  -6  -6   90142    3190
   2   6   6   95222    3080
   2   6   6   93449    3200
   2   6   6   90132    3240
  -3  -6  -6   45972    1630
   3   6   6   45962    1630
   3   6   6   45082    1610
   3   6   6   43561    1680
  -4  -6  -6    7245     420
   4   6   6    9258     550
   4   6   6    8519     430
   4   6   6    6719     500
  -5  -6  -6   12877     580
   5   6   6   12013     580
   5   6   6   13309     710
   5   6   6   11836     670
  -6  -6  -6     152     160
   6   6   6      39     270
   6   6   6     336     330
   7   6   6    3064     450
   7   6   6    3285     440
   8   6   6    2274     340
   8   6   6    2006     400
   8   6   6    2432     450
   9   6   6       1     300
   9   6   6     419     400
   9   6   6     294     370
  10   6   6       1     370
  10   6   6       1     410
   9  -7  -6      14     390
   9  -7  -6      22     360
   9  -7  -6     162     290
   8  -7  -6     259     280
   8  -7  -6     190     350
   8  -7  -6     113     330
   7  -7  -6    3764     460
   7  -7  -6    4674     520
   7  -7  -6    4326     430
   6  -7  -6    1465     330
   6  -7  -6    1031     330
   6  -7  -6    2079     380
   5  -7  -6    3276     400
   5  -7  -6    2997     270
   5  -7  -6    3132     400
   5  -7  -6    2949     400
   4  -7  -6    4489     290
   4  -7  -6    4628     400
   4  -7  -6    4051     390
   4  -7  -6    4937     430
  -4   7   6    4297     300
   3  -7  -6      19     160
   3  -7  -6      19     210
   3  -7  -6      19     230
   3  -7  -6     353     260
  -3   7   6     129     180
   2  -7  -6    1181     230
   2  -7  -6    1135     300
   2  -7  -6     833     280
   2  -7  -6    1043     200
  -2   7   6    1459     240
   1  -7  -6     281     170
   1  -7  -6     131     210
   1  -7  -6     217     230
  -1   7   6     217     160
  -1   7   6       1     180
  -1   7   6       1     230
  -1  -7  -6       1     230
  -1  -7  -6      53     200
   1   7   6     228     120
   1   7   6       1     260
   1   7   6     217     230
   1   7   6       1     200
  -2  -7  -6    1085     260
   2   7   6    1232     300
   2   7   6    1094     140
   2   7   6     802     260
   2   7   6    1130     250
  -3  -7  -6     260     200
   3   7   6      19     250
   3   7   6      19     250
   3   7   6      19     190
  -4  -7  -6    4700     350
   4   7   6    4700     400
   4   7   6    4849     360
   4   7   6    4593     440
  -5  -7  -6    2893     310
   5   7   6    3018     310
   5   7   6    2586     400
   5   7   6    3037     420
   6   7   6    1561     370
   6   7   6    1275     390
   7   7   6    3822     470
   7   7   6    5529     560
   8   7   6       0     390
   8   7   6       0     350
   9   7   6     185     400
   9   7   6     241     390
   9  -8  -6       1     410
   9  -8  -6     782     340
   9  -8  -6     899     430
   8  -8  -6       5     360
   8  -8  -6       5     290
   8  -8  -6      80     390
   7  -8  -6    3079     510
   7  -8  -6    4090     530
   7  -8  -6    3490     480
   6  -8  -6    6671     530
   6  -8  -6    7572     560
   6  -8  -6    6660     560
   5  -8  -6    2473     410
   5  -8  -6    2684     410
   5  -8  -6    1799     390
  -5   8   6    2482     270
   4  -8  -6    4552     340
   4  -8  -6    4874     470
   4  -8  -6    5746     510
   4  -8  -6    5114     440
  -4   8   6    4593     340
   3  -8  -6     538     300
   3  -8  -6     370     190
   3  -8  -6     250     300
   3  -8  -6     426     230
  -3   8   6     342     230
   2  -8  -6    1601     230
   2  -8  -6    1196     300
   2  -8  -6     850     270
   2  -8  -6    1227     240
  -2   8   6    1735     270
   1  -8  -6   18983     840
   1  -8  -6   20803     890
  -1   8   6   17962     900
  -1   8   6   19307     770
   0  -8  -6   10793     630
   0  -8  -6   10092     620
   0   8   6    9527     480
   0   8   6    9824     580
   0   8   6    9087     660
  -1  -8  -6   18303     840
  -1  -8  -6   20590     860
   1   8   6   18455     690
   1   8   6   19022     890
   1   8   6   19761     820
  -2  -8  -6    1211     280
   2   8   6    1389     330
   2   8   6    1117     140
   2   8   6     929     290
   2   8   6    1389     290
  -3  -8  -6      90     240
   3   8   6     214     110
   3   8   6     116     320
   3   8   6     643     310
   3   8   6       2     240
  -4  -8  -6    4042     370
   4   8   6    4125     470
   4   8   6    4501     390
   4   8   6    4282     460
  -5  -8  -6    2188     320
   5   8   6    2581     450
   5   8   6    2352     440
   6   8   6    6637     530
   6   8   6    5977     560
   7   8   6    3829     550
   7   8   6    2930     500
   8   8   6       2     380
   8   8   6       5     400
   9   8   6     190     430
   9   8   6     324     460
   8  -9  -6     664     390
   8  -9  -6      18     390
   8  -9  -6      18     370
   7  -9  -6     316     390
   7  -9  -6     528     370
   7  -9  -6      95     370
   6  -9  -6     586     360
   6  -9  -6     473     370
   6  -9  -6     360     340
   5  -9  -6    4007     500
   5  -9  -6    3218     440
   5  -9  -6    3880     470
  -5   9   6    3666     330
   4  -9  -6    3993     400
   4  -9  -6    3014     440
   4  -9  -6    3338     450
  -4   9   6    3154     300
   3  -9  -6      14     310
   3  -9  -6      14     240
   3  -9  -6      14     330
  -3   9   6     168     240
   2  -9  -6       8     290
   2  -9  -6      18     310
   2  -9  -6     364     240
  -2   9   6     210     250
   1  -9  -6     757     330
   1  -9  -6    1036     350
  -1   9   6     144     260
  -1   9   6     703     370
  -1  -9  -6     526     290
  -1  -9  -6     743     330
   1   9   6     743     370
   1   9   6     427     300
  -2  -9  -6     415     300
   2   9   6     700     360
   2   9   6      51     300
  -3  -9  -6      16     270
   3   9   6      14     360
   3   9   6      73     320
  -4  -9  -6    3621     370
   4   9   6    3814     460
   4   9   6    2649     460
   5   9   6    3297     500
   5   9   6    3570     510
   6   9   6     203     380
   6   9   6     929     420
   7   9   6      14     410
   7   9   6     240     420
   8   9   6      17     430
   8   9   6     413     490
   7 -10  -6     822     440
   7 -10  -6     481     430
   7 -10  -6     549     400
   6 -10  -6     617     390
   6 -10  -6     303     390
   6 -10  -6      76     340
   5 -10  -6     779     390
   5 -10  -6     551     330
   5 -10  -6     770     390
   4 -10  -6     786     380
   4 -10  -6     425     390
   4 -10  -6     786     330
  -4  10   6     532     260
   3 -10  -6     986     390
   3 -10  -6    1407     320
   3 -10  -6    1234     390
  -3  10   6    1407     300
   2 -10  -6     384     350
   2 -10  -6     785     380
  -2  10   6     411     280
   1 -10  -6    1330     390
   1 -10  -6    1754     410
  -1  10   6    2371     360
  -1  10   6    2093     460
   0 -10  -6     946     360
   0 -10  -6     382     350
   0  10   6      67     410
   0  10   6     264     290
  -1 -10  -6    2287     440
  -1 -10  -6    1628     380
   1  10   6    1762     440
   1  10   6    2061     370
  -2 -10  -6     577     330
   2  10   6     641     420
   2  10   6     218     350
  -3 -10  -6    1408     350
   3  10   6    1841     410
   3  10   6    1255     440
  -4 -10  -6     923     310
   4  10   6     328     410
   4  10   6     962     400
   5  10   6     118     410
   5  10   6      39     430
   6  10   6     193     420
   6  10   6       1     430
   7  10   6     463     460
   7  10   6     825     510
   7 -11  -6     100     420
   6 -11  -6       0     400
   6 -11  -6       0     360
   6 -11  -6      10     420
   5 -11  -6       4     400
   5 -11  -6     710     420
   5 -11  -6     405     360
   4 -11  -6      39     370
   4 -11  -6     224     320
   4 -11  -6     463     410
   3 -11  -6     815     420
   3 -11  -6     337     290
   3 -11  -6     640     410
  -3  11   6     439     290
   2 -11  -6       6     310
   2 -11  -6     223     370
  -2  11   6       6     280
   1 -11  -6     986     410
   1 -11  -6    1141     420
  -1  11   6     650     330
  -1 -11  -6     993     380
  -1 -11  -6    1187     430
   1  11   6     944     470
   1  11   6    1061     370
  -2 -11  -6     371     330
   2  11   6       5     330
   2  11   6       5     440
  -3 -11  -6     652     350
   3  11   6     920     420
   3  11   6      58     450
   4  11   6     330     480
   4  11   6     185     420
   5  11   6     823     490
   5  11   6     290     450
   6  11   6       0     450
   6  11   6       0     460
   5 -12  -6     591     440
   5 -12  -6       1     340
   5 -12  -6     317     450
   4 -12  -6       1     440
   4 -12  -6     285     420
   4 -12  -6       1     320
   3 -12  -6     365     420
   3 -12  -6       0     400
   2 -12  -6     598     410
   2 -12  -6     609     440
  -2  12   6     380     330
   1 -12  -6       4     380
   1 -12  -6       2     420
   0 -12  -6    1308     460
   0 -12  -6    1496     450
   0  12   6    1120     500
   0  12   6    1101     400
  -1 -12  -6       3     380
  -1 -12  -6     117     370
   1  12   6       3     450
   1  12   6      13     360
  -2 -12  -6     568     380
   2  12   6     503     410
   2  12   6    1072     510
   3  12   6       0     420
   3  12   6       0     440
   4  12   6     178     480
   4  12   6     199     460
   5  12   6     320     510
   5  12   6       1     460
   4 -13  -6      55     470
   4 -13  -6     413     480
   3 -13  -6       6     440
   3 -13  -6       6     460
   2 -13  -6       3     420
   2 -13  -6     188     450
   1 -13  -6    1572     500
   1 -13  -6    1772     510
  -1  13   6     775     380
  -1 -13  -6    1392     470
  -1 -13  -6    1482     510
   1  13   6     794     560
   1  13   6     266     410
  -2 -13  -6       3     390
   2  13   6     306     430
   2  13   6     724     550
   3  13   6     577     530
   3  13   6     236     440
   4  13   6     961     600
   4  13   6       1     490
   0 -14  -6       0     450
   4  13  -7       2     420
   4  13  -7     530     570
   3  13  -7       9     560
   3  13  -7      22     460
   2  13  -7       9     370
   2  13  -7     167     530
  -2 -13   7       9     400
  -2 -13   7       9     380
   1  13  -7     588     530
   1  13  -7     200     380
  -1 -13   7     599     420
  -1 -13   7     223     420
  -1  13  -7     526     530
   1 -13   7    1265     480
   1 -13   7     656     440
  -2  13  -7     408     530
   2 -13   7       8     420
   2 -13   7       8     440
   3 -13   7       9     430
   3 -13   7     429     440
   4 -13   7     288     460
   5  12  -7    1831     540
   5  12  -7    1766     620
   4  12  -7    2308     540
   4  12  -7    1434     580
   3  12  -7    2758     450
   3  12  -7    2427     550
   2  12  -7    1698     440
   2  12  -7     773     520
  -2 -12   7    1455     450
  -2 -12   7    1027     410
   1  12  -7     296     490
   1  12  -7    1336     370
  -1 -12   7    1144     400
  -1 -12   7     995     420
   0  12  -7    5080     510
   0  12  -7    3963     630
   0 -12   7    6091     600
   0 -12   7    5288     570
  -1  12  -7    1200     330
  -1  12  -7     620     460
   1 -12   7    1413     440
   1 -12   7     354     370
  -2  12  -7     846     520
   2 -12   7     873     420
   2 -12   7     916     460
   3 -12   7    2705     470
   3 -12   7    3676     560
   4 -12   7    2151     530
   4 -12   7    1398     480
   5 -12   7    2072     510
   5 -12   7    2062     500
   6  11  -7     196     440
   6  11  -7       1     470
   5  11  -7       4     440
   5  11  -7     458     450
   4  11  -7     769     420
   4  11  -7     700     490
   3  11  -7     131     440
   3  11  -7       0     350
  -3 -11   7     199     330
   2  11  -7     589     460
   2  11  -7     284     320
  -2 -11   7     481     350
  -2 -11   7     262     340
   1  11  -7     449     320
   1  11  -7     141     430
  -1 -11   7     440     350
  -1 -11   7     504     360
  -1  11  -7     502     450
  -1  11  -7      60     250
   1 -11   7     183     380
   1 -11   7       5     330
  -2  11  -7     579     430
  -2  11  -7     229     240
   2 -11   7     417     240
   2 -11   7     482     360
   2 -11   7     461     370
   3 -11   7     437     260
   3 -11   7     280     400
   3 -11   7       0     340
   4 -11   7     750     420
   4 -11   7     592     300
   4 -11   7     898     410
   5 -11   7      95     320
   5 -11   7       4     380
   5 -11   7       4     380
   6 -11   7      42     340
   6 -11   7     176     400
   6 -11   7       1     370
   7  10  -7       1     460
   7  10  -7       1     440
   6  10  -7    1617     530
   6  10  -7    1272     460
   5  10  -7    4894     660
   5  10  -7    4993     590
   4  10  -7    4896     530
   4  10  -7    4441     610
  -4 -10   7    4857     470
   3  10  -7    1097     420
   3  10  -7     799     330
  -3 -10   7     892     310
   2  10  -7    3105     470
   2  10  -7    2245     530
  -2 -10   7    3605     490
  -2 -10   7    3729     490
   1  10  -7   13469     770
   1  10  -7   14415     670
  -1 -10   7   14952     720
  -1 -10   7   14184     750
   0  10  -7   11150     860
   0  10  -7   12565     680
   0 -10   7   12536     740
   0 -10   7   12161     800
  -1  10  -7   14646     600
  -1  10  -7   15040     830
   1 -10   7   13283     690
   1 -10   7   13327     540
   1 -10   7   15838     780
  -2  10  -7    3295     380
  -2  10  -7    3189     590
   2 -10   7    2638     360
   2 -10   7    4331     560
   2 -10   7    2775     460
  -3  10  -7    1149     410
   3 -10   7     240     240
   3 -10   7     567     340
   3 -10   7     733     330
   4 -10   7    5917     590
   4 -10   7    4626     470
   4 -10   7    5120     540
   5 -10   7    3286     460
   5 -10   7    4161     520
   5 -10   7    5015     570
   6 -10   7    1664     400
   6 -10   7    2199     470
   6 -10   7     814     420
   7 -10   7      73     360
   7 -10   7      21     390
   7 -10   7     651     410
   8   9  -7    1671     580
   8   9  -7    1889     550
   7   9  -7    1224     480
   7   9  -7    1051     480
   6   9  -7    4296     610
   6   9  -7    4441     580
   5   9  -7    1529     400
   5   9  -7    1551     430
   4   9  -7     144     390
   4   9  -7       1     320
  -4  -9   7      89     260
   3   9  -7       3     310
   3   9  -7     104     360
  -3  -9   7       3     270
   2   9  -7      13     380
   2   9  -7     339     290
  -2  -9   7      44     290
  -2  -9   7     414     300
   1   9  -7     453     270
   1   9  -7     259     360
  -1  -9   7     117     280
  -1  -9   7     301     310
  -1   9  -7      37     220
  -1   9  -7     287     360
   1  -9   7      21     330
   1  -9   7      55     280
   1  -9   7      55     170
  -2   9  -7     212     340
  -2   9  -7     319     200
   2  -9   7       3     280
   2  -9   7     219     340
   2  -9   7      55     220
  -3   9  -7     136     360
  -3   9  -7       3     160
   3  -9   7       3     310
   3  -9   7      57     250
   3  -9   7       3     290
   4  -9   7       2     310
   4  -9   7       2     260
   4  -9   7     497     320
   5  -9   7    1130     340
   5  -9   7    1218     360
   5  -9   7    1152     360
   6  -9   7    3508     500
   6  -9   7    3827     500
   6  -9   7    3788     490
   7  -9   7    1638     430
   7  -9   7    1293     430
   7  -9   7    1242     400
   8  -9   7    1359     410
   8  -9   7     784     410
   8  -9   7    1111     430
   9   8  -7      24     450
   9   8  -7     755     520
   8   8  -7     452     470
   8   8  -7     166     440
   7   8  -7    2705     520
   7   8  -7    3441     560
   6   8  -7    5365     560
   6   8  -7    4929     530
   5   8  -7    3657     450
   5   8  -7    3825     540
  -5  -8   7    3704     370
   4   8  -7    1706     370
   4   8  -7    2376     430
  -4  -8   7    2431     310
   3   8  -7    1419     320
   3   8  -7    1098     320
  -3  -8   7     530     260
   2   8  -7    2977     390
   2   8  -7    2593     470
  -2  -8   7    3535     400
  -2  -8   7    3036     400
   1   8  -7     381     250
   1   8  -7     454     290
  -1  -8   7     122     240
  -1  -8   7     146     270
   0   8  -7    1099     230
   0   8  -7    1195     320
   0  -8   7    1159     250
   0  -8   7    1383     150
   0  -8   7    1581     280
  -1   8  -7      64     180
  -1   8  -7      55     300
   1  -8   7      91     270
   1  -8   7      36     240
   1  -8   7       4     170
  -2   8  -7    2650     460
  -2   8  -7    2767     280
   2  -8   7    2960     350
   2  -8   7    2518     390
   2  -8   7    3373     420
  -3   8  -7     563     140
  -3   8  -7    1562     360
   3  -8   7     943     290
   3  -8   7    1207     310
   3  -8   7     407     240
   4  -8   7    2439     350
   4  -8   7    2657     390
   4  -8   7    1780     340
   5  -8   7    4295     490
   5  -8   7    3427     450
   5  -8   7    3157     430
   6  -8   7    5328     510
   6  -8   7    5925     500
   6  -8   7    4485     480
   7  -8   7    3883     530
   7  -8   7    3234     450
   7  -8   7    2646     470
   8  -8   7     400     410
   8  -8   7     140     320
   8  -8   7      19     370
   9  -8   7      22     310
   9  -8   7    1018     430
   9  -8   7     623     410
   9   7  -7    6047     670
   9   7  -7    5998     730
   8   7  -7    8355     740
   8   7  -7    9745     710
   7   7  -7    8259     630
   7   7  -7    6901     650
   6   7  -7    2467     480
   6   7  -7    2072     410
   5   7  -7    7298     570
   5   7  -7    8700     560
  -5  -7   7    8176     450
   4   7  -7   17239     810
   4   7  -7   16011     870
  -4  -7   7   17161     770
   3   7  -7   11162     580
   3   7  -7   10305     630
   3   7  -7   11331     490
  -3  -7   7   11436     540
   2   7  -7    5040     370
   2   7  -7    5495     440
   2   7  -7    4408     480
  -2  -7   7    4733     410
   1   7  -7     186     270
   1   7  -7     535     210
   1   7  -7     756     180
   1   7  -7     594     220
  -1  -7   7     558     220
  -1  -7   7     278     190
  -1   7  -7     380     160
  -1   7  -7     305     240
  -1   7  -7     561     270
   1  -7   7     806     260
   1  -7   7     667     220
  -2   7  -7    4511     470
  -2   7  -7    4357     290
   2  -7   7    4601     470
   2  -7   7    4357     410
  -3   7  -7   11088     640
  -3   7  -7   11785     380
   3  -7   7   10951     570
   3  -7   7   11373     610
   4  -7   7   18026     870
   4  -7   7   17207     840
   5  -7   7    9017     580
   5  -7   7    7820     560
   6  -7   7    2359     420
   6  -7   7    2307     390
   6  -7   7    2601     440
   7  -7   7    7492     630
   7  -7   7    7720     590
   7  -7   7    6974     590
   8  -7   7    9345     700
   8  -7   7    8940     720
   8  -7   7   10514     650
   9  -7   7    6608     740
   9  -7   7    6480     710
   9  -7   7    6803     590
  10   6  -7    1069     450
  10   6  -7    1090     480
   9   6  -7    2071     500
   9   6  -7    2166     490
   9   6  -7    1350     340
   8   6  -7    8763     680
   8   6  -7    7509     680
   8   6  -7    7803     530
   7   6  -7    5239     510
   7   6  -7    4484     510
   7   6  -7    5250     400
   6   6  -7    7820     660
   6   6  -7    8188     650
   6   6  -7    8642     470
  -6  -6   7    7946     430
   5   6  -7   25378    1130
   5   6  -7   25288    1050
  -5  -6   7   24979     950
   4   6  -7   26376    1080
   4   6  -7   26818     910
   4   6  -7   26529    1010
  -4  -6   7   26684     950
   3   6  -7   41389    1440
   3   6  -7   38494    1620
   3   6  -7   36948    1500
   3   6  -7   38446    1530
  -3  -6   7   38987    1530
   2   6  -7   79758    2440
   2   6  -7   78105    2510
   2   6  -7   80989    2290
   2   6  -7   78505    2350
  -2  -6   7   79263    2300
  -2  -6   7   79327    2450
   1   6  -7   64463    2580
   1   6  -7   68208    2530
   1   6  -7   68028    2400
   1   6  -7   66378    2350
  -1  -6   7   67579    2370
  -1  -6   7   68799    2530
   0   6  -7   46147    1520
   0   6  -7   46379    1480
   0   6  -7   46105    1370
   0   6  -7   44944    1370
   0  -6   7   44585    1480
   0  -6   7   45092    1380
  -1   6  -7   69090    2380
  -1   6  -7   67623    2410
  -1   6  -7   65508    2600
  -1   6  -7   68632    2570
   1  -6   7   69080    2420
   1  -6   7   68833    2570
  -2   6  -7   79322    2540
  -2   6  -7   79870    2290
  -2   6  -7   86281    2520
   2  -6   7   79586    2510
   2  -6   7   78901    2370
  -3   6  -7   38768    1600
   3  -6   7   39280    1600
   3  -6   7   39555    1520
   3  -6   7   40286    1600
   4  -6   7   26306     990
   4  -6   7   26953    1040
   4  -6   7   27756    1040
   5  -6   7   26978    1040
   5  -6   7   24082    1010
   5  -6   7   25105    1050
   6  -6   7    8716     550
   6  -6   7    7979     610
   6  -6   7    7640     570
   7  -6   7    6053     530
   7  -6   7    5558     540
   7  -6   7    5672     460
   8  -6   7    8592     710
   8  -6   7    8360     570
   8  -6   7    7068     630
   9  -6   7    1844     480
   9  -6   7    1844     340
   9  -6   7    2024     450
  10  -6   7    1621     500
  10  -6   7     695     420
  10  -6   7    1228     300
  10   5  -7    1286     360
  10   5  -7    1063     340
  10   5  -7    1371     450
  10   5  -7    1020     450
   9   5  -7    3974     420
   9   5  -7    3741     520
   9   5  -7    4306     410
   9   5  -7    3718     500
   8   5  -7    1808     360
   8   5  -7    2129     470
   8   5  -7    1857     340
   8   5  -7    2145     480
   7   5  -7    3780     400
   7   5  -7    3616     330
   7   5  -7    4238     470
   6   5  -7    7010     450
   6   5  -7    7353     580
   6   5  -7    7010     570
  -6  -5   7    6991     370
   5   5  -7    5707     420
   5   5  -7    6016     340
   5   5  -7    6622     490
   5   5  -7    5420     350
  -5  -5   7    5463     320
   4   5  -7    8694     560
   4   5  -7    6861     410
   4   5  -7    7993     420
  -4  -5   7    7946     420
   3   5  -7    4078     220
   2   5  -7       6     170
   2   5  -7      17     210
   2   5  -7      79     120
  -2  -5   7      79     150
  -2  -5   7       4      80
   1   5  -7      72     200
   1   5  -7      72     120
   1   5  -7      72     170
  -1  -5   7      72     170
  -1  -5   7     236     150
  -1  -5   7      72     130
  -1   5  -7     133     140
  -1   5  -7      72     180
  -1   5  -7      72     190
  -1   5  -7      72     110
   1  -5   7      72     170
   1  -5   7     385     170
   1  -5   7      72     150
  -2   5  -7       5      90
  -2   5  -7       4     150
  -2   5  -7      10     210
  -2   5  -7       6     210
   2  -5   7      87     180
   2  -5   7       8     180
   2  -5   7      33     180
  -3   5  -7    4060     300
   3  -5   7    4155     300
   3  -5   7    4734     310
   3  -5   7    4652     310
  -4   5  -7    8280     510
   4  -5   7    7958     500
   4  -5   7    8005     510
   4  -5   7    9152     500
   5  -5   7    6258     420
   5  -5   7    6364     430
   5  -5   7    6947     440
   6  -5   7    7580     570
   6  -5   7    6980     480
   6  -5   7    6524     500
   7  -5   7    2805     370
   7  -5   7    4521     360
   8  -5   7    1905     340
   8  -5   7    1807     400
   8  -5   7    2403     500
   9  -5   7    3691     450
   9  -5   7    2679     470
   9  -5   7    4047     350
  10  -5   7    1421     280
  10  -5   7    1368     460
  10  -5   7    1580     440
  10   4  -7     259     400
  10   4  -7     656     360
  10   4  -7     561     430
  10   4  -7     287     310
   9   4  -7    4543     470
   9   4  -7    5207     540
   9   4  -7    5393     580
   9   4  -7    5486     460
   8   4  -7    1035     380
   8   4  -7    1391     410
   8   4  -7    1688     320
   8   4  -7    1544     330
   7   4  -7    3651     430
   7   4  -7    3896     340
   7   4  -7    4374     370
   7   4  -7    3084     380
   6   4  -7   18977     920
   6   4  -7   18116     800
  -6  -4   7   18234     670
  -6  -4   7   17529     670
   5   4  -7   19496     870
   5   4  -7   19173     760
   5   4  -7   18781     700
  -5  -4   7   19274     700
  -5  -4   7   19284     690
   4   4  -7   63306    2150
   4   4  -7   65538    1940
   4   4  -7   62630    2050
   4   4  -7   61226    2020
  -4  -4   7   64135    2020
   3   4  -7  147389    5319
   3   4  -7  145080    5199
   3   4  -7  152106    4910
  -3  -4   7  149979    5229
  -3  -4   7  150260    5199
   2   4  -7  109104    3080
   2   4  -7  106432    3290
   2   4  -7  109567    3370
  -2  -4   7  116679    3300
  -2  -4   7  109293    3270
   1   4  -7  110722    3710
   1   4  -7  111453    3960
   1   4  -7  111290    4020
  -1  -4   7  109838    3720
  -1  -4   7  113588    4020
   0   4  -7  163336    5209
   0   4  -7  164906    5269
   0   4  -7  168957    4900
   0  -4   7  164424    4900
   0  -4   7  176214    5219
   0  -4   7  167624    5259
  -1   4  -7  114027    3820
  -1   4  -7  111054    4060
  -1   4  -7  111583    4090
   1  -4   7  121056    4070
   1  -4   7  113970    3820
   1  -4   7  112315    4090
  -2   4  -7  111349    3390
  -2   4  -7  110350    3360
  -2   4  -7  108057    3110
  -2   4  -7  113103    3180
   2  -4   7  110182    3180
   2  -4   7  115749    3370
   2  -4   7  113219    3380
  -3   4  -7  148995    5349
  -3   4  -7  153753    5069
   3  -4   7  150455    5069
   3  -4   7  152447    5389
   3  -4   7  156625    5349
  -4   4  -7   63862    2110
   4  -4   7   65020    2110
   4  -4   7   66514    2140
   4  -4   7   62500    2030
  -5   4  -7   19950     780
   5  -4   7   19125     770
   5  -4   7   18490     780
   5  -4   7   19376     800
   6  -4   7   17539     790
   6  -4   7   18155     790
   6  -4   7   19065     860
   7  -4   7    3332     410
   7  -4   7    4292     330
   7  -4   7    3941     330
   8  -4   7    1298     380
   8  -4   7    1601     280
   9  -4   7    5720     550
   9  -4   7    5627     590
   9  -4   7    5450     390
  10  -4   7    1101     240
  10  -4   7     364     420
  10  -4   7     687     410
  10   3  -7    2533     470
  10   3  -7    1998     400
  10   3  -7    2009     400
  10   3  -7    1556     360
   9   3  -7    5723     540
   9   3  -7    6401     520
   9   3  -7    6014     560
   9   3  -7    4806     570
   8   3  -7    4160     350
   8   3  -7    4870     420
   8   3  -7    3945     460
   8   3  -7    4556     410
   7   3  -7    4410     490
   7   3  -7    3932     520
   7   3  -7    3817     430
   6   3  -7    5594     340
   6   3  -7    4668     290
   6   3  -7    4310     380
   5   3  -7    4224     440
   5   3  -7    3035     330
   5   3  -7    2950     230
  -5  -3   7    2967     220
   4   3  -7   11333     430
   4   3  -7    9981     480
   4   3  -7   10303     370
  -4  -3   7   10968     370
   3   3  -7    5870     380
   3   3  -7    5503     480
   3   3  -7    5838     390
  -3  -3   7    5432     470
  -3  -3   7    5400     390
   2   3  -7     146     170
   2   3  -7     284      90
   2   3  -7     275     130
  -2  -3   7     275     100
   1   3  -7    4474     430
   1   3  -7    4523     410
   1   3  -7    4551     340
  -1  -3   7    4835     350
  -1  -3   7    4516     430
  -1   3  -7    4838     430
  -1   3  -7    4548     420
  -1   3  -7    4555     390
   1  -3   7    4874     420
   1  -3   7    5168     440
   1  -3   7    4903     390
  -2   3  -7     187     150
  -2   3  -7     215     140
  -2   3  -7     274      60
  -2   3  -7     117     140
   2  -3   7     131     150
   2  -3   7     201     140
   2  -3   7     327     140
  -3   3  -7    6557     460
  -3   3  -7    6735     460
   3  -3   7    6573     460
   3  -3   7    6202     460
   3  -3   7    6010     450
  -4   3  -7   10846     440
   4  -3   7    9758     460
   4  -3   7   12412     470
   4  -3   7   10269     430
  -5   3  -7    2988     310
   5  -3   7    3055     200
   5  -3   7    3438     310
   5  -3   7    3969     400
   6  -3   7    4965     280
   6  -3   7    4436     200
   6  -3   7    4523     270
   6  -3   7    4990     370
   7  -3   7    4230     390
   7  -3   7    3942     310
   7  -3   7    3942     490
   7  -3   7    3517     390
   8  -3   7    4568     310
   8  -3   7    4297     250
   8  -3   7    3626     420
   9  -3   7    4996     580
   9  -3   7    7014     630
   9  -3   7    5102     390
  10  -3   7    2047     430
  10  -3   7    1713     450
  10  -3   7    1616     220
  11   2  -7     481     380
  11   2  -7     441     340
  11   2  -7     689     400
  11   2  -7    1683     460
  10   2  -7      78     270
  10   2  -7      24     340
  10   2  -7       3     340
  10   2  -7       3     330
   9   2  -7       2     290
   9   2  -7     149     290
   9   2  -7     259     330
   9   2  -7     182     260
   8   2  -7    1668     300
   8   2  -7    1562     340
   8   2  -7    1243     350
   7   2  -7    5616     370
   7   2  -7    4683     430
   7   2  -7    5139     410
   6   2  -7    8836     630
   6   2  -7    9548     600
   6   2  -7   10290     550
   5   2  -7   40466    1420
   5   2  -7   41154    1240
   5   2  -7   40914    1360
   5   2  -7   39673    1250
   4   2  -7   31492    1170
   4   2  -7   30261    1010
   4   2  -7   29830    1110
   4   2  -7   30511    1030
   3   2  -7     869     140
   3   2  -7    1107     240
   3   2  -7    1251     190
  -3  -2   7    1429     170
  -3  -2   7     862     170
   2   2  -7   29864     810
   2   2  -7   29216     870
  -2  -2   7   29614     820
  -2  -2   7   30659     810
   1   2  -7  191818    6389
   1   2  -7  196307    6869
   1   2  -7  186920    6789
  -1  -2   7  195051    6869
  -1  -2   7  195099    6399
  -1  -2   7  194168    6789
   0   2  -7  272032    8199
   0   2  -7  264207    8129
   0   2  -7  266446    7669
   0  -2   7  262296    8189
   0  -2   7  265707    7679
   0  -2   7  261865    8129
  -1   2  -7  191361    6389
  -1   2  -7  195197    6429
  -1   2  -7  186827    6779
  -1   2  -7  197116    6819
   1  -2   7  191591    6389
   1  -2   7  187690    6779
   1  -2   7  197327    6819
  -2   2  -7   29852     810
  -2   2  -7   30760     750
  -2   2  -7   30748     850
   2  -2   7   30170     750
   2  -2   7   30737     840
   2  -2   7   29761     820
   2  -2   7   31043     850
  -3   2  -7    1325     220
  -3   2  -7    1149     190
  -3   2  -7    1044     120
   3  -2   7    1218     190
   3  -2   7    1225     190
   3  -2   7    1066     130
   3  -2   7    1157     220
  -4   2  -7   31148    1110
   4  -2   7   31899    1120
   4  -2   7   32039    1110
   4  -2   7   31068    1010
  -5   2  -7   42474    1350
   5  -2   7   43546    1360
   5  -2   7   41194    1370
   5  -2   7   41808    1260
  -6   2  -7    9936     520
   6  -2   7    9606     520
   6  -2   7    9757     480
   6  -2   7    9722     630
   7  -2   7    5306     290
   7  -2   7    4794     320
   7  -2   7    5161     310
   7  -2   7    5903     430
   8  -2   7    1577     230
   8  -2   7    1538     210
   8  -2   7    1422     370
   9  -2   7     410     340
   9  -2   7      82     220
   9  -2   7     172     150
  10  -2   7     276     370
  10  -2   7     408     380
  11  -2   7    1125     440
  11  -2   7    1066     460
  11   1  -7    5456     650
  11   1  -7    6082     690
  11   1  -7    6503     610
  11   1  -7    5818     560
  10   1  -7    7834     660
  10   1  -7    7144     660
  10   1  -7    6640     540
  10   1  -7    8101     580
   9   1  -7    8679     710
   9   1  -7    8558     700
   9   1  -7    7473     580
   9   1  -7    7641     590
   8   1  -7   13428     690
   8   1  -7   11311     570
   8   1  -7   12211     670
   7   1  -7   14332     880
   7   1  -7   13991     770
   6   1  -7   11900     440
   6   1  -7   11791     300
   6   1  -7   12168     500
   5   1  -7   16400     760
   5   1  -7   16195     840
   5   1  -7   16533     720
   4   1  -7   15385     430
   4   1  -7   14717     510
   4   1  -7   15011     450
  -4  -1   7   15946     510
  -4  -1   7   15794     420
   3   1  -7   11056     740
   3   1  -7   10606     680
   3   1  -7   10718     650
  -3  -1   7   11124     680
  -3  -1   7   11139     730
   2   1  -7     404     170
   2   1  -7     461     120
   2   1  -7     440     150
   2   1  -7     571     200
  -2  -1   7     530     170
  -2  -1   7     396     160
   1   1  -7    6342     140
   1   1  -7    5587     120
  -1  -1   7    6063     120
  -1   1  -7    6356      90
  -1   1  -7    5600     100
  -1   1  -7    5286     120
   1  -1   7    6488      90
   1  -1   7    5353     100
   1  -1   7    4461     120
   1  -1   7    5658     110
  -2   1  -7     382     170
  -2   1  -7     382     150
   2  -1   7     432     170
   2  -1   7     511     170
   2  -1   7     401     140
   2  -1   7     497     160
  -3   1  -7   10683     700
  -3   1  -7   10848     640
   3  -1   7   10901     650
   3  -1   7   10601     700
   3  -1   7   10856     710
  -4   1  -7   15287     460
   4  -1   7   15615     440
   4  -1   7   15568     460
   4  -1   7   16047     520
  -5   1  -7   16250     750
   5  -1   7   16978     830
   5  -1   7   15895     730
   5  -1   7   16578     760
  -6   1  -7   13010     380
   6  -1   7   12332     530
   6  -1   7   12089     400
   6  -1   7   12768     390
   7  -1   7   14918     850
   7  -1   7   13739     710
   7  -1   7   13765     690
   7  -1   7   13017     680
   8  -1   7   12763     670
   8  -1   7   12375     520
   8  -1   7   13559     450
   8  -1   7   12763     450
   9  -1   7    8029     370
   9  -1   7    8132     520
   9  -1   7    8910     690
  10  -1   7    6292     660
  10  -1   7    6684     610
  11  -1   7    5430     640
  11  -1   7    6017     680
  11  -1  -7    5661     580
  11  -1  -7    6492     700
  10  -1  -7    6677     510
  10  -1  -7    7224     680
  10  -1  -7    6316     530
   9  -1  -7    7452     610
   9  -1  -7    9278     720
   8  -1  -7   12956     420
   8  -1  -7   12690     700
   8  -1  -7   12746     590
   8  -1  -7   12480     420
   7  -1  -7   13903     660
   7  -1  -7   13659     870
   7  -1  -7   13502     670
   7  -1  -7   13241     760
   6  -1  -7   13023     460
   6  -1  -7   11187     530
   6  -1  -7   12018     380
  -6   1   7   13312     370
   5  -1  -7   16599     770
   5  -1  -7   16111     740
   5  -1  -7   15756     850
  -5   1   7   15402     730
  -5   1   7   16671     770
   4  -1  -7   15838     460
   4  -1  -7   15301     540
   4  -1  -7   14949     470
  -4   1   7   15966     540
   3  -1  -7   10910     750
   3  -1  -7   11377     700
   3  -1  -7   10408     670
   3  -1  -7   11075     700
  -3   1   7   10910     670
  -3   1   7   10618     690
   2  -1  -7     740     170
   2  -1  -7     359     150
   2  -1  -7     398     180
   2  -1  -7     552     160
  -2   1   7     991     150
  -2   1   7     387     160
  -2   1   7     305     170
   1  -1  -7    4695     130
   1  -1  -7    4279     110
   1  -1  -7    5645     110
  -1   1   7    3883      20
  -1   1   7    4449     130
  -1   1   7    5965     100
  -1   1   7    3883      80
  -1  -1  -7    6536      70
  -1  -1  -7    5358     110
  -1  -1  -7    5774     130
   1   1   7    5358     120
   1   1   7    5148     110
   1   1   7    5605      80
  -2  -1  -7     362     170
   2   1   7     552     150
   2   1   7     622     130
  -3  -1  -7   11017     690
  -3  -1  -7   10972     700
   3   1   7   11613     700
   3   1   7   11394     700
   3   1   7   10612     700
  -4  -1  -7   16220     450
   4   1   7   16162     460
   4   1   7   16290     500
   4   1   7   16011     490
  -5  -1  -7   16120     720
   5   1   7   15836     770
   5   1   7   16236     790
   5   1   7   16467     730
  -6  -1  -7   12561     320
   6   1   7   12682     470
   6   1   7   11198     440
   6   1   7   12694     520
   6   1   7   12513     340
   7   1   7   13148     750
   7   1   7   14280     840
   7   1   7   13279     790
   8   1   7   13374     680
   8   1   7   13009     610
   8   1   7   13264     610
   9   1   7    8063     580
   9   1   7    7839     660
   9   1   7    7998     600
  10   1   7    5396     520
  10   1   7    6037     480
  10   1   7    6801     630
  10   1   7    6522     590
  11   1   7    6431     730
  11   1   7    5834     660
  11  -2  -7    1036     380
  11  -2  -7     848     460
  10  -2  -7     428     400
  10  -2  -7     252     270
  10  -2  -7     307     320
   9  -2  -7       2     270
   9  -2  -7     270     140
   9  -2  -7     831     350
   8  -2  -7    1331     310
   8  -2  -7    1437     200
   8  -2  -7    1081     350
   7  -2  -7    5283     450
   7  -2  -7    5128     380
   7  -2  -7    4961     300
   7  -2  -7    5793     300
   6  -2  -7    9960     550
   6  -2  -7    9870     660
   6  -2  -7    9754     580
   6  -2  -7    9603     520
   5  -2  -7   41174    1340
   5  -2  -7   44007    1330
   5  -2  -7   42643    1450
   5  -2  -7   40466    1320
  -5   2   7   43476    1340
  -5   2   7   41445    1340
   4  -2  -7   32328    1050
   4  -2  -7   31107    1150
   4  -2  -7   30506    1080
   4  -2  -7   30336    1060
  -4   2   7   26972    1130
  -4   2   7   31787    1080
  -4   2   7   31177    1050
   3  -2  -7    1107     220
   3  -2  -7    1017     180
   3  -2  -7    1145     190
   3  -2  -7    1175     190
  -3   2   7    1017     190
   2  -2  -7   29849     790
   2  -2  -7   29747     850
   2  -2  -7   28939     820
   2  -2  -7   29235     780
  -2   2   7   28643     840
  -2   2   7   29440     790
  -2   2   7   30678     780
   1  -2  -7  193759    6349
   1  -2  -7  184710    6719
   1  -2  -7  190019    6799
   1  -2  -7  191611    6409
  -1   2   7  188552    6409
  -1   2   7  192742    6799
  -1   2   7  194804    6349
   0  -2  -7  257132    7839
   0  -2  -7  278368    7919
   0  -2  -7  277978    8369
   0  -2  -7  267178    8309
   0   2   7  268071    7919
   0   2   7  272085    8309
   0   2   7  276172    7849
  -1  -2  -7  192793    6529
  -1  -2  -7  191009    6839
  -1  -2  -7  197667    6879
   1   2   7  195882    6879
   1   2   7  191345    6529
   1   2   7  190981    6839
   1   2   7  201975    6479
  -2  -2  -7   30948     810
  -2  -2  -7   30074     810
  -2  -2  -7   30051     830
   2   2   7   31095     820
   2   2   7   29733     820
   2   2   7   29539     820
  -3  -2  -7    1030     160
  -3  -2  -7    1015     160
   3   2   7    1015     160
   3   2   7    1272     170
   3   2   7    1113     210
  -4  -2  -7   32248    1100
  -4  -2  -7   30977    1090
   4   2   7   32989    1130
   4   2   7   31848    1080
   4   2   7   30717    1110
  -5  -2  -7   43547    1310
   5   2   7   42465    1310
   5   2   7   41299    1380
   5   2   7   41330    1340
  -6  -2  -7   10587     450
   6   2   7    9505     600
   6   2   7    9585     580
   6   2   7   10023     460
   7   2   7    6222     420
   7   2   7    5473     400
   8   2   7    1462     360
   8   2   7    1481     300
   8   2   7    1423     310
   9   2   7       2     260
   9   2   7     388     290
   9   2   7     215     330
  10   2   7     254     360
  10   2   7       3     350
  10   2   7     139     300
  10   2   7     209     320
  11   2   7    1296     450
  11   2   7     870     380
  11   2   7     712     420
  10  -3  -7    1739     470
  10  -3  -7    2137     400
   9  -3  -7    6864     670
   9  -3  -7    6176     530
   9  -3  -7    5799     400
   8  -3  -7    3841     450
   8  -3  -7    4181     290
   8  -3  -7    3772     390
   7  -3  -7    4284     530
   7  -3  -7    3563     380
   7  -3  -7    4549     480
   7  -3  -7    4127     390
   6  -3  -7    4413     330
   6  -3  -7    4450     260
   6  -3  -7    4252     350
   6  -3  -7    4857     290
   5  -3  -7    3859     370
   5  -3  -7    3466     310
   5  -3  -7    3552     400
   5  -3  -7    3008     330
   4  -3  -7   10330     400
   4  -3  -7    9785     420
   4  -3  -7    9863     470
   4  -3  -7    9830     420
  -4   3   7   10475     420
  -4   3   7   10052     410
   3  -3  -7    5887     430
   3  -3  -7    6112     400
   3  -3  -7    5736     430
   3  -3  -7    5863     470
  -3   3   7    5600     460
  -3   3   7    6216     430
  -3   3   7    5935     430
  -3   3   7    6007     410
   2  -3  -7     216     150
   2  -3  -7     181     160
   2  -3  -7     181     150
   2  -3  -7     201     140
  -2   3   7     141     150
  -2   3   7     535      80
  -2   3   7     181     140
   1  -3  -7    4621     390
   1  -3  -7    4473     400
   1  -3  -7    4628     400
   1  -3  -7    4926     430
   1  -3  -7    3902     410
  -1   3   7    4585     390
  -1   3   7    4402     400
  -1   3   7    3922     400
  -1   3   7    4557     390
  -1  -3  -7    4102     410
  -1  -3  -7    4649     400
   1   3   7    4628     410
   1   3   7    4269     400
   1   3   7    4727     410
  -2  -3  -7      91     140
  -2  -3  -7     176     120
  -2  -3  -7    1091      70
   2   3   7     232     140
   2   3   7     152     130
   2   3   7     142     140
  -3  -3  -7    6162     410
  -3  -3  -7    6484     430
  -3  -3  -7    6234     450
   3   3   7    6025     430
   3   3   7    6500     420
   3   3   7    5706     460
  -4  -3  -7   10123     360
  -4  -3  -7    8516     370
   4   3   7    9789     360
   4   3   7   10267     450
   4   3   7    9989     410
  -5  -3  -7    3440     250
   5   3   7    3295     340
   5   3   7    3346     250
   5   3   7    2990     350
  -6  -3  -7    4596     190
   6   3   7    4928     350
   6   3   7    4707     200
   6   3   7    4547     300
   7   3   7    4227     470
   7   3   7    4334     480
   8   3   7    5299     430
   8   3   7    4220     400
   9   3   7    5681     580
   9   3   7    6309     560
   9   3   7    5913     530
  10   3   7    1389     400
  10   3   7    1736     390
  10   3   7    2166     440
  10   3   7    1704     380
  10  -4  -7     588     230
  10  -4  -7     512     370
  10  -4  -7     692     430
   9  -4  -7    5664     520
   9  -4  -7    6036     600
   9  -4  -7    5809     410
   8  -4  -7    1215     260
   8  -4  -7    1663     410
   8  -4  -7    1304     340
   7  -4  -7    4644     480
   7  -4  -7    3879     320
   7  -4  -7    4230     410
   7  -4  -7    3932     330
   7  -4  -7    3559     320
   6  -4  -7   17788     780
   6  -4  -7   18453     750
   6  -4  -7   17084     800
   6  -4  -7   17964     890
   5  -4  -7   19377     840
   5  -4  -7   18491     760
   5  -4  -7   18883     770
   5  -4  -7   19085     710
   4  -4  -7   62064    1950
   4  -4  -7   62648    2090
   4  -4  -7   61480    2040
   4  -4  -7   62956    1920
   3  -4  -7  147708    4930
   3  -4  -7  145872    5209
   3  -4  -7  147389    5269
   3  -4  -7  151671    4940
  -3   4   7  149583    5279
  -3   4   7  146036    4930
  -3   4   7  148694    4940
   2  -4  -7  107819    3320
   2  -4  -7  114105    3350
   2  -4  -7  110995    3120
   2  -4  -7  109954    3120
   2  -4  -7  105085    3290
  -2   4   7  109376    3120
  -2   4   7  109323    3320
  -2   4   7  108356    3120
   1  -4  -7  109647    4000
   1  -4  -7  112714    3780
   1  -4  -7  111233    3980
   1  -4  -7  112811    3770
  -1   4   7  110666    4000
  -1   4   7  113012    3980
  -1   4   7  111695    3760
  -1   4   7  110935    3780
   0  -4  -7  165521    4800
   0  -4  -7  156525    4760
   0  -4  -7  162445    5039
   0   4   7  160814    5039
   0   4   7  160239    5079
   0   4   7  164475    5059
   0   4   7  162137    4790
  -1  -4  -7  109991    3960
  -1  -4  -7  104935    3730
  -1  -4  -7  113743    3750
  -1  -4  -7  110770    3930
   1   4   7  109712    3750
   1   4   7  110202    3960
   1   4   7  113782    3930
  -2  -4  -7  106153    3280
  -2  -4  -7  109961    3310
   2   4   7  113093    3140
   2   4   7  110602    3280
   2   4   7  107510    3150
   2   4   7  110602    3310
  -3  -4  -7  148447    5229
   3   4   7  149859    5229
   3   4   7  152450    5289
   3   4   7  148331    5029
  -4  -4  -7   62843    2050
  -4  -4  -7   64656    2110
   4   4   7   63744    2030
   4   4   7   64031    2110
   4   4   7   64666    2050
  -5  -4  -7   19043     700
   5   4   7   18690     700
   5   4   7   19566     800
   5   4   7   18962     790
  -6  -4  -7   17512     680
   6   4   7   17346     820
   6   4   7   17971     690
   6   4   7   18089     820
   7   4   7    3243     390
   7   4   7    3618     370
   8   4   7    1304     330
   8   4   7    1473     360
   9   4   7    5543     530
   9   4   7    5243     490
   9   4   7    6082     530
  10   4   7    1080     390
  10   4   7     391     350
  10   4   7    1129     410
  10   4   7     849     360
  10  -5  -7     489     420
  10  -5  -7    1784     430
  10  -5  -7     849     250
   9  -5  -7    4854     490
   9  -5  -7    2999     320
   9  -5  -7    3527     500
   8  -5  -7    2070     330
   8  -5  -7    2875     450
   8  -5  -7    2029     470
   7  -5  -7    3483     430
   7  -5  -7    4051     350
   7  -5  -7    3098     380
   6  -5  -7    7061     490
   6  -5  -7    7433     500
   6  -5  -7    7213     420
   6  -5  -7    6870     580
   6  -5  -7    6623     540
   5  -5  -7    4958     380
   5  -5  -7    5694     400
   5  -5  -7    6386     340
   5  -5  -7    5886     450
   4  -5  -7    8310     420
   4  -5  -7    7923     510
   4  -5  -7    7328     490
   4  -5  -7    6819     500
  -4   5   7    7828     420
   3  -5  -7    4281     240
   3  -5  -7    3636     290
   3  -5  -7    3467     260
   3  -5  -7    3720     280
  -3   5   7    4174     250
   2  -5  -7      43     180
   2  -5  -7     176     190
   2  -5  -7       3     160
   2  -5  -7      25     150
  -2   5   7      11     170
  -2   5   7      10     160
   1  -5  -7     385     140
   1  -5  -7     189     170
   1  -5  -7      72     180
   1  -5  -7      72     140
   1  -5  -7      72     190
  -1   5   7      72     160
  -1   5   7     560     150
  -1   5   7     276     160
  -1   5   7      72     170
  -1  -5  -7      71     170
  -1  -5  -7      71     160
  -1  -5  -7      71     180
  -1  -5  -7     213     150
   1   5   7     575     180
   1   5   7     213     160
   1   5   7      71     180
   1   5   7     255     170
  -2  -5  -7      16     160
  -2  -5  -7      71     180
   2   5   7      11     200
   2   5   7      32     170
   2   5   7      49     170
  -3  -5  -7    4580     280
  -3  -5  -7    4047     260
   3   5   7    4320     320
   3   5   7    3856     280
   3   5   7    4225     260
  -4  -5  -7    8211     430
  -4  -5  -7    8126     480
   4   5   7    6776     430
   4   5   7    7511     520
   4   5   7    7511     490
  -5  -5  -7    5884     320
   5   5   7    5789     330
   5   5   7    6619     440
   5   5   7    7160     480
  -6  -5  -7    6830     380
   6   5   7    7410     530
   6   5   7    7182     400
   6   5   7    6811     570
   7   5   7    4248     420
   7   5   7    3769     390
   8   5   7    2034     430
   8   5   7    2299     420
   9   5   7    3643     450
   9   5   7    3754     460
   9   5   7    2857     430
  10   5   7    1147     370
  10   5   7    1996     440
  10   5   7     835     400
  10   5   7    1211     400
  10  -6  -7     818     450
  10  -6  -7    1213     430
  10  -6  -7     954     290
   9  -6  -7    1623     310
   9  -6  -7    1888     480
   9  -6  -7    1462     430
   8  -6  -7    7676     650
   8  -6  -7    8131     630
   8  -6  -7    6927     540
   7  -6  -7    4909     470
   7  -6  -7    6219     560
   7  -6  -7    5424     450
   6  -6  -7    8618     560
   6  -6  -7    7969     570
   6  -6  -7    8511     640
   6  -6  -7    8201     450
   6  -6  -7    8414     600
   5  -6  -7   26238    1050
   5  -6  -7   25118     920
   5  -6  -7   24918    1080
   5  -6  -7   24968    1020
   4  -6  -7   27272     900
   4  -6  -7   25688    1020
   4  -6  -7   26429    1020
   4  -6  -7   26058     980
  -4   6   7   26151     900
   3  -6  -7   39513    1540
   3  -6  -7   40187    1610
   3  -6  -7   39256    1600
   3  -6  -7   40870    1480
  -3   6   7   39902    1490
   2  -6  -7   82589    2410
   2  -6  -7   81064    2520
   2  -6  -7   81411    2540
   2  -6  -7   81821    2370
  -2   6   7   80338    2380
  -2   6   7   81600    2520
   1  -6  -7   67610    2550
   1  -6  -7   65038    2420
   1  -6  -7   69192    2400
  -1   6   7   69049    2410
  -1   6   7   66724    2520
   0  -6  -7   41769    1370
   0  -6  -7   47133    1370
   0  -6  -7   43767    1450
   0   6   7   44876    1380
   0   6   7   45656    1390
   0   6   7   43809    1470
   0   6   7   45129    1450
  -1  -6  -7   63060    2380
  -1  -6  -7   67480    2490
   1   6   7   64612    2520
   1   6   7   67251    2440
   1   6   7   66679    2380
   1   6   7   67699    2500
  -2  -6  -7   79182    2470
   2   6   7   78656    2510
   2   6   7   82979    2390
   2   6   7   80129    2480
  -3  -6  -7   40148    1580
   3   6   7   39503    1580
   3   6   7   39588    1620
   3   6   7   41657    1570
  -4  -6  -7   26857     960
   4   6   7   27269     970
   4   6   7   26117    1030
   4   6   7   26241    1020
  -5  -6  -7   24533     950
   5   6   7   25534    1060
   5   6   7   25123    1050
   5   6   7   25885     960
  -6  -6  -7    7849     440
   6   6   7    8334     650
   6   6   7    8072     590
   6   6   7    8654     460
   7   6   7    5519     500
   7   6   7    5437     510
   8   6   7    7670     630
   8   6   7    7306     610
   9   6   7    1734     440
   9   6   7    2180     470
   9   6   7    1876     370
  10   6   7     801     440
   9  -7  -7    6171     630
   9  -7  -7    6044     540
   9  -7  -7    5566     660
   8  -7  -7   10423     770
   8  -7  -7    9843     700
   8  -7  -7   10154     640
   7  -7  -7    7885     570
   7  -7  -7    7378     570
   7  -7  -7    6110     570
   6  -7  -7    2745     420
   6  -7  -7    2997     450
   6  -7  -7    3076     450
   5  -7  -7    7436     550
   5  -7  -7    7425     520
   5  -7  -7    8271     390
   5  -7  -7    7554     520
   4  -7  -7   15933     820
   4  -7  -7   18090     820
   4  -7  -7   18031     710
   4  -7  -7   16684     840
  -4   7   7   17348     730
   3  -7  -7   12365     500
   3  -7  -7   11014     600
   3  -7  -7   11490     570
   3  -7  -7   11395     610
  -3   7   7   11933     520
   2  -7  -7    4106     390
   2  -7  -7    4548     360
   2  -7  -7    4755     440
[truncated: 869,430 more chars]
