# Supplementary material
Source: MDPI journal article supplement (https://www.mdpi.com/2073-4352/7/12/354)
Supplement: s1 [file s1 › crystals-245662-supplementary/2.cif]

data_tgs146_1
_audit_creation_date              2017-11-05
_audit_creation_method
;
Olex2 1.2
(compiled 2017.08.10 svn.r3458 for OlexSys, GUI svn.r5381)
;
_shelx_SHELXL_version_number      '2014/7'
_publ_contact_author_address      ?
_publ_contact_author_email        ?
_publ_contact_author_id_orcid     ?
_publ_contact_author_name         ''
_publ_contact_author_phone        ?
_publ_section_references
;
Dolomanov, O.V., Bourhis, L.J., Gildea, R.J, Howard, J.A.K. & Puschmann, H.
 (2009), J. Appl. Cryst. 42, 339-341.

Sheldrick, G.M. (2015). Acta Cryst. C71, 3-8.
;
_chemical_name_common             ?
_chemical_name_systematic         ?
_chemical_formula_moiety          'C13 H12 N6 O4 S Zn, 0.5(C3 H7 N O)'
_chemical_formula_sum             'C14.50 H15.50 N6.50 O4.50 S Zn'
_chemical_formula_weight          450.26
_chemical_melting_point           ?
loop_
  _atom_type_symbol
  _atom_type_description
  _atom_type_scat_dispersion_real
  _atom_type_scat_dispersion_imag
  _atom_type_scat_source
 'C' 'C' 0.0033 0.0016 'International Tables Vol C Tables 4.2.6.8 and 6.1.1.4'
 'H' 'H' 0.0000 0.0000 'International Tables Vol C Tables 4.2.6.8 and 6.1.1.4'
 'N' 'N' 0.0061 0.0033 'International Tables Vol C Tables 4.2.6.8 and 6.1.1.4'
 'O' 'O' 0.0106 0.0060 'International Tables Vol C Tables 4.2.6.8 and 6.1.1.4'
 'S' 'S' 0.1246 0.1234 'International Tables Vol C Tables 4.2.6.8 and 6.1.1.4'
 'Zn' 'Zn' 0.2839 1.4301 'International Tables Vol C Tables 4.2.6.8 and 6.1.1.4'

_shelx_space_group_comment
;
The symmetry employed for this shelxl refinement is uniquely defined
by the following loop, which should always be used as a source of
symmetry information in preference to the above space-group names.
They are only intended as comments.
;
_space_group_crystal_system       'monoclinic'
_space_group_IT_number            14
_space_group_name_H-M_alt         'P 1 21/c 1'
_space_group_name_Hall            '-P 2ybc'
loop_
  _space_group_symop_operation_xyz
 'x, y, z'
 '-x, y+1/2, -z+1/2'
 '-x, -y, -z'
 'x, -y-1/2, z-1/2'

_cell_length_a                    6.4235(2)
_cell_length_b                    15.4396(5)
_cell_length_c                    19.2190(7)
_cell_angle_alpha                 90
_cell_angle_beta                  90.7550(10)
_cell_angle_gamma                 90
_cell_volume                      1905.90(11)
_cell_formula_units_Z             4
_cell_measurement_reflns_used     9837
_cell_measurement_temperature     296(2)
_cell_measurement_theta_max       25.78
_cell_measurement_theta_min       2.50
_shelx_estimated_absorpt_T_max    ?
_shelx_estimated_absorpt_T_min    ?
_exptl_absorpt_coefficient_mu     1.436
_exptl_absorpt_correction_T_max   0.7453
_exptl_absorpt_correction_T_min   0.5922
_exptl_absorpt_correction_type    multi-scan
_exptl_absorpt_process_details
'SADABS-2012/1 (Bruker,2012) was used for absorption correction. wR2(int) was 0.0835 before and 0.0637 after correction. The Ratio of minimum to maximum transmission is 0.7946. The \l/2 correction factor is 0.0015.'
_exptl_absorpt_special_details    ?
_exptl_crystal_colour             colourless
_exptl_crystal_colour_primary     colourless
_exptl_crystal_density_diffrn     1.569
_exptl_crystal_density_meas       .
_exptl_crystal_density_method     ?
_exptl_crystal_description        prism
_exptl_crystal_F_000              920
_exptl_crystal_size_max           0.4
_exptl_crystal_size_mid           0.3
_exptl_crystal_size_min           0.1
_exptl_transmission_factor_max    ?
_exptl_transmission_factor_min    ?
_diffrn_reflns_av_R_equivalents   0.0381
_diffrn_reflns_av_unetI/netI      0.0220
_diffrn_reflns_Laue_measured_fraction_full 0.993
_diffrn_reflns_Laue_measured_fraction_max 0.993
_diffrn_reflns_limit_h_max        7
_diffrn_reflns_limit_h_min        -7
_diffrn_reflns_limit_k_max        18
_diffrn_reflns_limit_k_min        -18
_diffrn_reflns_limit_l_max        23
_diffrn_reflns_limit_l_min        -23
_diffrn_reflns_number             29130
_diffrn_reflns_point_group_measured_fraction_full 0.993
_diffrn_reflns_point_group_measured_fraction_max 0.993
_diffrn_reflns_theta_full         25.801
_diffrn_reflns_theta_max          25.801
_diffrn_reflns_theta_min          2.497
_diffrn_ambient_temperature       296.15
_diffrn_detector_area_resol_mean  ?
_diffrn_measured_fraction_theta_full 0.993
_diffrn_measured_fraction_theta_max 0.993
_diffrn_measurement_device_type   'CCD area detector'
_diffrn_measurement_method        'phi and omega scans'
_diffrn_radiation_monochromator   'graphite'
_diffrn_radiation_type            MoK\a
_diffrn_radiation_wavelength      0.71073
_diffrn_source                    ?
_reflns_Friedel_coverage          0.000
_reflns_Friedel_fraction_full     .
_reflns_Friedel_fraction_max      .
_reflns_number_gt                 3405
_reflns_number_total              3640
_reflns_special_details
;
 Reflections were merged by SHELXL according to the crystal
 class for the calculation of statistics and refinement.
 
 _reflns_Friedel_fraction is defined as the number of unique
 Friedel pairs measured divided by the number that would be
 possible theoretically, ignoring centric projections and
 systematic absences.
;
_reflns_threshold_expression      'I > 2\s(I)'
_computing_cell_refinement        ?
_computing_data_collection        ?
_computing_data_reduction         ?
_computing_molecular_graphics     'Olex2 (Dolomanov et al., 2009)'
_computing_publication_material   'Olex2 (Dolomanov et al., 2009)'
_computing_structure_refinement   'ShelXL (Sheldrick, 2015)'
_computing_structure_solution     ?
_refine_diff_density_max          0.952
_refine_diff_density_min          -0.613
_refine_diff_density_rms          0.069
_refine_ls_extinction_coef        .
_refine_ls_extinction_method      none
_refine_ls_goodness_of_fit_ref    1.060
_refine_ls_hydrogen_treatment     constr
_refine_ls_matrix_type            full
_refine_ls_number_parameters      244
_refine_ls_number_reflns          3640
_refine_ls_number_restraints      8
_refine_ls_R_factor_all           0.0378
_refine_ls_R_factor_gt            0.0356
_refine_ls_restrained_S_all       1.062
_refine_ls_shift/su_max           0.001
_refine_ls_shift/su_mean          0.000
_refine_ls_structure_factor_coef  Fsqd
_refine_ls_weighting_details
'w=1/[\s^2^(Fo^2^)+(0.0630P)^2^+1.4720P] where P=(Fo^2^+2Fc^2^)/3'
_refine_ls_weighting_scheme       calc
_refine_ls_wR_factor_gt           0.1064
_refine_ls_wR_factor_ref          0.1084
_refine_special_details           ?
_olex2_refinement_description
;
1. Fixed Uiso
 At 1.2 times of:
  All C(H) groups, All C(H,H) groups
 At 1.5 times of:
  All C(H,H,H) groups
2. Restrained distances
 N3S-C4S = N3S-C5S
 1.45 with sigma of 0.02
 N3S-C2S
 1.35 with sigma of 0.02
 C2S-O1S
 1.25 with sigma of 0.02
 C2S-C4S
 2.42 with sigma of 0.04
 C5S-C4S
 2.42 with sigma of 0.04
 C2S-C5S
 2.42 with sigma of 0.04
 O1S-N3S
 2.3 with sigma of 0.04
3. Uiso/Uaniso restraints and constraints
Uiso(O1S) = Uiso(C2S) = Uiso(N3S) = Uiso(C4S) = Uiso(C5S)
4. Others
 Fixed Sof: O1S(0.5) N3S(0.5) C2S(0.5) H2S(0.5) C4S(0.5) H4SA(0.5) H4SB(0.5)
 H4SC(0.5) C5S(0.5) H5SA(0.5) H5SB(0.5) H5SC(0.5)
5.a Secondary CH2 refined with riding coordinates:
 C23(H23A,H23B), C24(H24A,H24B), C25(H25A,H25B)
5.b Aromatic/amide H refined with riding coordinates:
 C13(H13), C14(H14), C21(H21), C22(H22), C26(H26), C27(H27), C2S(H2S)
5.c Idealised Me refined as rotating group:
 C4S(H4SA,H4SB,H4SC), C5S(H5SA,H5SB,H5SC)
;
_atom_sites_solution_hydrogens    geom
_atom_sites_solution_primary      ?
_atom_sites_solution_secondary    ?
loop_
  _atom_site_label
  _atom_site_type_symbol
  _atom_site_fract_x
  _atom_site_fract_y
  _atom_site_fract_z
  _atom_site_U_iso_or_equiv
  _atom_site_adp_type
  _atom_site_occupancy
  _atom_site_site_symmetry_order
  _atom_site_calc_flag
  _atom_site_refinement_flags_posn
  _atom_site_refinement_flags_adp
  _atom_site_refinement_flags_occupancy
  _atom_site_disorder_assembly
  _atom_site_disorder_group
 Zn1 Zn 0.39349(4) 0.35527(2) 0.72366(2) 0.03556(13) Uani 1 1 d . . . . .
 S11 S -0.04158(11) 0.11520(4) 0.68863(4) 0.04504(19) Uani 1 1 d . . . . .
 O11 O 0.2093(4) 0.26889(13) 0.68449(13) 0.0609(6) Uani 1 1 d . . . . .
 O12 O 0.0734(4) 0.32988(17) 0.59002(13) 0.0709(7) Uani 1 1 d . . . . .
 O13 O -0.2235(3) -0.05149(13) 0.73490(11) 0.0494(5) Uani 1 1 d . . . . .
 O14 O -0.5344(3) -0.03295(15) 0.68511(12) 0.0586(6) Uani 1 1 d . . . . .
 N21 N 0.5802(3) 0.41545(13) 0.65652(11) 0.0358(4) Uani 1 1 d . . . . .
 N22 N 0.8259(3) 0.49456(14) 0.61475(11) 0.0380(5) Uani 1 1 d . . . . .
 N23 N 0.6898(3) 0.48219(16) 0.56051(11) 0.0440(5) Uani 1 1 d . . . . .
 N24 N 1.4683(4) 0.76806(14) 0.71201(12) 0.0433(5) Uani 1 1 d . . . . .
 N25 N 1.3023(4) 0.70466(15) 0.62783(12) 0.0465(6) Uani 1 1 d . . . . .
 N26 N 1.4195(4) 0.64112(15) 0.65821(15) 0.0530(6) Uani 1 1 d . . . . .
 C11 C 0.0795(4) 0.27412(17) 0.63511(15) 0.0427(6) Uani 1 1 d . . . . .
 C12 C -0.0803(4) 0.20431(17) 0.63621(13) 0.0407(6) Uani 1 1 d . . . . .
 C13 C -0.2690(5) 0.2008(2) 0.60337(16) 0.0521(7) Uani 1 1 d . . . . .
 H13 H -0.3179 0.2432 0.5729 0.063 Uiso 1 1 calc R . . . .
 C14 C -0.3825(5) 0.1255(2) 0.62064(16) 0.0521(7) Uani 1 1 d . . . . .
 H14 H -0.5152 0.1136 0.6032 0.063 Uiso 1 1 calc R . . . .
 C15 C -0.2782(4) 0.07253(18) 0.66524(14) 0.0417(6) Uani 1 1 d . . . . .
 C16 C -0.3536(4) -0.00952(17) 0.69602(14) 0.0441(6) Uani 1 1 d . . . . .
 C21 C 0.7595(4) 0.45531(16) 0.67056(13) 0.0374(5) Uani 1 1 d . . . . .
 H21 H 0.8274 0.4553 0.7136 0.045 Uiso 1 1 calc R . . . .
 C22 C 0.5445(4) 0.43449(18) 0.58845(14) 0.0406(6) Uani 1 1 d . . . . .
 H22 H 0.4275 0.4154 0.5639 0.049 Uiso 1 1 calc R . . . .
 C23 C 1.0195(4) 0.54285(18) 0.60470(15) 0.0444(6) Uani 1 1 d . . . . .
 H23A H 1.0982 0.5164 0.5675 0.053 Uiso 1 1 calc R . . . .
 H23B H 1.1036 0.5404 0.6470 0.053 Uiso 1 1 calc R . . . .
 C24 C 0.9733(5) 0.63665(19) 0.58653(17) 0.0529(7) Uani 1 1 d . . . . .
 H24A H 0.8754 0.6385 0.5477 0.063 Uiso 1 1 calc R . . . .
 H24B H 0.9083 0.6645 0.6259 0.063 Uiso 1 1 calc R . . . .
 C25 C 1.1677(6) 0.6864(2) 0.56756(15) 0.0606(9) Uani 1 1 d . . . . .
 H25A H 1.2455 0.6531 0.5339 0.073 Uiso 1 1 calc R . . . .
 H25B H 1.1275 0.7406 0.5458 0.073 Uiso 1 1 calc R . . . .
 C26 C 1.3338(5) 0.77922(19) 0.66066(16) 0.0524(7) Uani 1 1 d . . . . .
 H26 H 1.2703 0.8315 0.6491 0.063 Uiso 1 1 calc R . . . .
 C27 C 1.5155(4) 0.68235(18) 0.70835(16) 0.0462(6) Uani 1 1 d . . . . .
 H27 H 1.6083 0.6555 0.7390 0.055 Uiso 1 1 calc R . . . .
 O1S O -0.0230(16) 0.1005(6) 0.4374(5) 0.1317(17) Uiso 0.5 1 d D . P A -1
 N3S N -0.0504(16) -0.0240(7) 0.5059(6) 0.1317(17) Uiso 0.5 1 d D . P A -1
 C2S C -0.122(2) 0.0365(10) 0.4590(9) 0.1317(17) Uiso 0.5 1 d D . P A -1
 H2S H -0.2565 0.0292 0.4417 0.158 Uiso 0.5 1 calc R . P A -1
 C4S C -0.177(2) -0.0980(8) 0.5262(7) 0.1317(17) Uiso 0.5 1 d D . P A -1
 H4SA H -0.1383 -0.1477 0.4994 0.198 Uiso 0.5 1 calc GR . P A -1
 H4SB H -0.3214 -0.0851 0.5179 0.198 Uiso 0.5 1 calc GR . P A -1
 H4SC H -0.1547 -0.1099 0.5748 0.198 Uiso 0.5 1 calc GR . P A -1
 C5S C 0.171(2) -0.0179(12) 0.5286(9) 0.1317(17) Uiso 0.5 1 d D . P A -1
 H5SA H 0.1782 -0.0055 0.5775 0.198 Uiso 0.5 1 calc GR . P A -1
 H5SB H 0.2383 0.0276 0.5033 0.198 Uiso 0.5 1 calc GR . P A -1
 H5SC H 0.2398 -0.0719 0.5196 0.198 Uiso 0.5 1 calc GR . P A -1

loop_
  _atom_site_aniso_label
  _atom_site_aniso_U_11
  _atom_site_aniso_U_22
  _atom_site_aniso_U_33
  _atom_site_aniso_U_23
  _atom_site_aniso_U_13
  _atom_site_aniso_U_12
 Zn1 0.0376(2) 0.02655(18) 0.0424(2) 0.00370(10) -0.00273(13) -0.00022(10)
 S11 0.0434(4) 0.0353(3) 0.0562(4) 0.0082(3) -0.0094(3) -0.0065(3)
 O11 0.0612(13) 0.0374(11) 0.0833(16) 0.0095(10) -0.0248(12) -0.0165(9)
 O12 0.0801(17) 0.0581(14) 0.0742(16) 0.0242(12) -0.0109(13) -0.0244(12)
 O13 0.0486(11) 0.0388(10) 0.0606(12) 0.0074(9) -0.0007(9) -0.0077(8)
 O14 0.0553(12) 0.0521(12) 0.0681(14) 0.0074(10) -0.0066(10) -0.0210(10)
 N21 0.0357(10) 0.0316(10) 0.0402(11) 0.0014(8) -0.0030(8) -0.0053(8)
 N22 0.0351(10) 0.0400(11) 0.0387(11) 0.0021(9) -0.0061(8) -0.0087(9)
 N23 0.0418(12) 0.0535(14) 0.0365(11) 0.0012(10) -0.0072(9) -0.0111(10)
 N24 0.0498(13) 0.0336(11) 0.0466(12) -0.0044(9) -0.0036(10) -0.0093(10)
 N25 0.0586(14) 0.0413(12) 0.0397(12) -0.0021(10) -0.0010(10) -0.0206(11)
 N26 0.0535(15) 0.0411(13) 0.0644(16) -0.0122(11) -0.0018(12) -0.0061(10)
 C11 0.0462(14) 0.0303(12) 0.0514(15) 0.0005(11) -0.0030(12) -0.0038(11)
 C12 0.0469(14) 0.0346(13) 0.0405(13) 0.0008(10) -0.0006(11) -0.0047(11)
 C13 0.0594(18) 0.0472(16) 0.0494(16) 0.0119(13) -0.0122(13) -0.0106(13)
 C14 0.0501(17) 0.0523(16) 0.0537(17) 0.0079(13) -0.0119(13) -0.0146(13)
 C15 0.0429(14) 0.0399(14) 0.0421(14) -0.0026(11) -0.0007(11) -0.0073(11)
 C16 0.0532(16) 0.0353(13) 0.0436(14) -0.0022(11) -0.0003(12) -0.0070(12)
 C21 0.0390(13) 0.0367(13) 0.0363(13) 0.0022(10) -0.0065(10) -0.0047(10)
 C22 0.0371(13) 0.0430(14) 0.0415(13) -0.0021(11) -0.0084(10) -0.0072(11)
 C23 0.0385(13) 0.0476(15) 0.0470(15) 0.0035(12) -0.0028(11) -0.0140(11)
 C24 0.0567(18) 0.0468(16) 0.0547(17) 0.0051(13) -0.0162(14) -0.0130(13)
 C25 0.088(2) 0.0530(18) 0.0401(15) 0.0057(13) -0.0105(15) -0.0323(17)
 C26 0.0685(19) 0.0365(14) 0.0518(16) 0.0014(12) -0.0111(14) -0.0124(13)
 C27 0.0438(15) 0.0364(14) 0.0583(17) -0.0069(12) -0.0036(12) -0.0054(11)

_geom_special_details
;
 All esds (except the esd in the dihedral angle between two l.s. planes)
 are estimated using the full covariance matrix.  The cell esds are taken
 into account individually in the estimation of esds in distances, angles
 and torsion angles; correlations between esds in cell parameters are only
 used when they are defined by crystal symmetry.  An approximate (isotropic)
 treatment of cell esds is used for estimating esds involving l.s. planes.
;
loop_
  _geom_bond_atom_site_label_1
  _geom_bond_atom_site_label_2
  _geom_bond_distance
  _geom_bond_site_symmetry_2
  _geom_bond_publ_flag
 Zn1 O11 1.929(2) . ?
 Zn1 O13 1.9804(19) 2_556 ?
 Zn1 N21 2.002(2) . ?
 Zn1 N24 2.025(2) 2_746 ?
 S11 C12 1.721(3) . ?
 S11 C15 1.711(3) . ?
 O11 C11 1.258(3) . ?
 O12 C11 1.222(4) . ?
 O13 Zn1 1.9804(19) 2_546 ?
 O13 C16 1.289(3) . ?
 O14 C16 1.232(3) . ?
 N21 C21 1.330(3) . ?
 N21 C22 1.357(3) . ?
 N22 N23 1.365(3) . ?
 N22 C21 1.308(3) . ?
 N22 C23 1.465(3) . ?
 N23 C22 1.310(3) . ?
 N24 Zn1 2.025(2) 2_756 ?
 N24 C26 1.314(4) . ?
 N24 C27 1.360(4) . ?
 N25 N26 1.363(4) . ?
 N25 C25 1.464(4) . ?
 N25 C26 1.327(4) . ?
 N26 C27 1.303(4) . ?
 C11 C12 1.489(4) . ?
 C12 C13 1.360(4) . ?
 C13 H13 0.9300 . ?
 C13 C14 1.414(4) . ?
 C14 H14 0.9300 . ?
 C14 C15 1.356(4) . ?
 C15 C16 1.482(4) . ?
 C21 H21 0.9300 . ?
 C22 H22 0.9300 . ?
 C23 H23A 0.9700 . ?
 C23 H23B 0.9700 . ?
 C23 C24 1.518(4) . ?
 C24 H24A 0.9700 . ?
 C24 H24B 0.9700 . ?
 C24 C25 1.515(4) . ?
 C25 H25A 0.9700 . ?
 C25 H25B 0.9700 . ?
 C26 H26 0.9300 . ?
 C27 H27 0.9300 . ?
 O1S C2S 1.248(13) . ?
 N3S C2S 1.374(15) . ?
 N3S C4S 1.459(12) . ?
 N3S C5S 1.485(15) . ?
 C2S H2S 0.9300 . ?
 C4S H4SA 0.9600 . ?
 C4S H4SB 0.9600 . ?
 C4S H4SC 0.9600 . ?
 C5S H5SA 0.9600 . ?
 C5S H5SB 0.9600 . ?
 C5S H5SC 0.9600 . ?

loop_
  _geom_angle_atom_site_label_1
  _geom_angle_atom_site_label_2
  _geom_angle_atom_site_label_3
  _geom_angle
  _geom_angle_site_symmetry_1
  _geom_angle_site_symmetry_3
  _geom_angle_publ_flag
 O11 Zn1 O13 108.71(10) . 2_556 ?
 O11 Zn1 N21 116.04(10) . . ?
 O11 Zn1 N24 92.31(10) . 2_746 ?
 O13 Zn1 N21 105.07(9) 2_556 . ?
 O13 Zn1 N24 118.52(9) 2_556 2_746 ?
 N21 Zn1 N24 116.15(9) . 2_746 ?
 C15 S11 C12 91.89(13) . . ?
 C11 O11 Zn1 130.33(18) . . ?
 C16 O13 Zn1 104.00(17) . 2_546 ?
 C21 N21 Zn1 127.47(17) . . ?
 C21 N21 C22 103.3(2) . . ?
 C22 N21 Zn1 128.81(17) . . ?
 N23 N22 C23 120.4(2) . . ?
 C21 N22 N23 110.4(2) . . ?
 C21 N22 C23 129.1(2) . . ?
 C22 N23 N22 102.6(2) . . ?
 C26 N24 Zn1 130.5(2) . 2_756 ?
 C26 N24 C27 103.5(2) . . ?
 C27 N24 Zn1 125.61(19) . 2_756 ?
 N26 N25 C25 121.1(2) . . ?
 C26 N25 N26 109.9(2) . . ?
 C26 N25 C25 128.9(3) . . ?
 C27 N26 N25 102.6(2) . . ?
 O11 C11 C12 113.1(2) . . ?
 O12 C11 O11 126.5(3) . . ?
 O12 C11 C12 120.3(3) . . ?
 C11 C12 S11 119.5(2) . . ?
 C13 C12 S11 111.1(2) . . ?
 C13 C12 C11 129.3(3) . . ?
 C12 C13 H13 123.7 . . ?
 C12 C13 C14 112.5(3) . . ?
 C14 C13 H13 123.7 . . ?
 C13 C14 H14 123.5 . . ?
 C15 C14 C13 113.1(3) . . ?
 C15 C14 H14 123.5 . . ?
 C14 C15 S11 111.3(2) . . ?
 C14 C15 C16 127.3(3) . . ?
 C16 C15 S11 121.2(2) . . ?
 O13 C16 C15 116.6(2) . . ?
 O14 C16 O13 123.6(3) . . ?
 O14 C16 C15 119.7(3) . . ?
 N21 C21 H21 125.1 . . ?
 N22 C21 N21 109.8(2) . . ?
 N22 C21 H21 125.1 . . ?
 N21 C22 H22 123.1 . . ?
 N23 C22 N21 113.9(2) . . ?
 N23 C22 H22 123.1 . . ?
 N22 C23 H23A 109.5 . . ?
 N22 C23 H23B 109.5 . . ?
 N22 C23 C24 110.6(2) . . ?
 H23A C23 H23B 108.1 . . ?
 C24 C23 H23A 109.5 . . ?
 C24 C23 H23B 109.5 . . ?
 C23 C24 H24A 109.1 . . ?
 C23 C24 H24B 109.1 . . ?
 H24A C24 H24B 107.9 . . ?
 C25 C24 C23 112.3(3) . . ?
 C25 C24 H24A 109.1 . . ?
 C25 C24 H24B 109.1 . . ?
 N25 C25 C24 112.8(2) . . ?
 N25 C25 H25A 109.0 . . ?
 N25 C25 H25B 109.0 . . ?
 C24 C25 H25A 109.0 . . ?
 C24 C25 H25B 109.0 . . ?
 H25A C25 H25B 107.8 . . ?
 N24 C26 N25 109.7(3) . . ?
 N24 C26 H26 125.1 . . ?
 N25 C26 H26 125.1 . . ?
 N24 C27 H27 122.9 . . ?
 N26 C27 N24 114.2(3) . . ?
 N26 C27 H27 122.9 . . ?
 C2S N3S C4S 121.7(11) . . ?
 C2S N3S C5S 117.4(10) . . ?
 C4S N3S C5S 120.4(11) . . ?
 O1S C2S N3S 126.2(14) . . ?
 O1S C2S H2S 116.9 . . ?
 N3S C2S H2S 116.9 . . ?
 N3S C4S H4SA 109.5 . . ?
 N3S C4S H4SB 109.5 . . ?
 N3S C4S H4SC 109.5 . . ?
 H4SA C4S H4SB 109.5 . . ?
 H4SA C4S H4SC 109.5 . . ?
 H4SB C4S H4SC 109.5 . . ?
 N3S C5S H5SA 109.5 . . ?
 N3S C5S H5SB 109.5 . . ?
 N3S C5S H5SC 109.5 . . ?
 H5SA C5S H5SB 109.5 . . ?
 H5SA C5S H5SC 109.5 . . ?
 H5SB C5S H5SC 109.5 . . ?

loop_
  _geom_torsion_atom_site_label_1
  _geom_torsion_atom_site_label_2
  _geom_torsion_atom_site_label_3
  _geom_torsion_atom_site_label_4
  _geom_torsion
  _geom_torsion_site_symmetry_1
  _geom_torsion_site_symmetry_2
  _geom_torsion_site_symmetry_3
  _geom_torsion_site_symmetry_4
  _geom_torsion_publ_flag
 Zn1 O11 C11 O12 18.2(5) . . . . ?
 Zn1 O11 C11 C12 -160.3(2) . . . . ?
 Zn1 O13 C16 O14 -6.5(3) 2_546 . . . ?
 Zn1 O13 C16 C15 171.66(19) 2_546 . . . ?
 Zn1 N21 C21 N22 -173.50(17) . . . . ?
 Zn1 N21 C22 N23 173.46(19) . . . . ?
 Zn1 N24 C26 N25 173.2(2) 2_756 . . . ?
 Zn1 N24 C27 N26 -173.6(2) 2_756 . . . ?
 S11 C12 C13 C14 -0.1(4) . . . . ?
 S11 C15 C16 O13 -7.5(4) . . . . ?
 S11 C15 C16 O14 170.7(2) . . . . ?
 O11 C11 C12 S11 -14.1(3) . . . . ?
 O11 C11 C12 C13 161.9(3) . . . . ?
 O12 C11 C12 S11 167.2(3) . . . . ?
 O12 C11 C12 C13 -16.7(5) . . . . ?
 N22 N23 C22 N21 -0.4(3) . . . . ?
 N22 C23 C24 C25 -173.4(2) . . . . ?
 N23 N22 C21 N21 0.2(3) . . . . ?
 N23 N22 C23 C24 64.9(3) . . . . ?
 N25 N26 C27 N24 -0.2(3) . . . . ?
 N26 N25 C25 C24 74.1(4) . . . . ?
 N26 N25 C26 N24 0.1(4) . . . . ?
 C11 C12 C13 C14 -176.4(3) . . . . ?
 C12 S11 C15 C14 -1.4(2) . . . . ?
 C12 S11 C15 C16 -177.6(2) . . . . ?
 C12 C13 C14 C15 -0.9(4) . . . . ?
 C13 C14 C15 S11 1.5(4) . . . . ?
 C13 C14 C15 C16 177.5(3) . . . . ?
 C14 C15 C16 O13 176.9(3) . . . . ?
 C14 C15 C16 O14 -4.8(5) . . . . ?
 C15 S11 C12 C11 177.5(2) . . . . ?
 C15 S11 C12 C13 0.8(2) . . . . ?
 C21 N21 C22 N23 0.5(3) . . . . ?
 C21 N22 N23 C22 0.1(3) . . . . ?
 C21 N22 C23 C24 -118.2(3) . . . . ?
 C22 N21 C21 N22 -0.4(3) . . . . ?
 C23 N22 N23 C22 177.5(2) . . . . ?
 C23 N22 C21 N21 -176.9(3) . . . . ?
 C23 C24 C25 N25 -72.5(4) . . . . ?
 C25 N25 N26 C27 179.6(3) . . . . ?
 C25 N25 C26 N24 -179.4(3) . . . . ?
 C26 N24 C27 N26 0.3(4) . . . . ?
 C26 N25 N26 C27 0.1(3) . . . . ?
 C26 N25 C25 C24 -106.4(4) . . . . ?
 C27 N24 C26 N25 -0.2(3) . . . . ?
 C4S N3S C2S O1S -178.1(16) . . . . ?
 C5S N3S C2S O1S -6(3) . . . . ?

_shelx_res_file
;
    tgs146_1.res created by SHELXL-2014/7

TITL tgs146_1_a.res in P2(1)/c
REM Old TITL tgs146_1 in P2(1)/c
REM SHELXT solution in P2(1)/c
REM R1 0.235, Rweak 0.009, Alpha 0.030, Orientation as input
REM Formula found by SHELXT: C37 O14 Pd2
CELL 0.71073 6.4235 15.4396 19.219 90 90.755 90
ZERR 4 0.0002 0.0005 0.0007 0 0.001 0
LATT 1
SYMM -X,0.5+Y,0.5-Z
SFAC C H N O S Zn
UNIT 58 62 26 18 4 4
DFIX 1.45 N3S C4S N3S C5S
DFIX 1.35 N3S C2S
DFIX 1.25 C2S O1S
DANG 2.42 C2S C4S
DANG 2.42 C5S C4S
DANG 2.42 C2S C5S
DANG 2.3 O1S N3S
EADP O1S C2S N3S C4S C5S

L.S. 8
PLAN  20
TEMP 23
BOND $H
list 4
MORE -1
CONF
fmap 2
acta 52
OMIT 0 1 1
REM <olex2.extras>
REM <HklSrc "%.\\tgs146_1.hkl">
REM </olex2.extras>

WGHT    0.063000    1.472000
FVAR       0.17144
ZN1   6    0.393485    0.355269    0.723658    11.00000    0.03760    0.02655 =
         0.04243    0.00370   -0.00273   -0.00022
S11   5   -0.041576    0.115204    0.688632    11.00000    0.04335    0.03527 =
         0.05623    0.00819   -0.00942   -0.00646
O11   4    0.209255    0.268889    0.684494    11.00000    0.06125    0.03740 =
         0.08328    0.00952   -0.02485   -0.01653
O12   4    0.073370    0.329877    0.590017    11.00000    0.08013    0.05808 =
         0.07416    0.02418   -0.01090   -0.02441
O13   4   -0.223468   -0.051493    0.734901    11.00000    0.04864    0.03881 =
         0.06063    0.00737   -0.00073   -0.00769
O14   4   -0.534370   -0.032949    0.685109    11.00000    0.05533    0.05206 =
         0.06813    0.00738   -0.00662   -0.02105
N21   3    0.580180    0.415453    0.656518    11.00000    0.03565    0.03158 =
         0.04018    0.00138   -0.00299   -0.00530
N22   3    0.825857    0.494560    0.614746    11.00000    0.03507    0.03997 =
         0.03867    0.00215   -0.00611   -0.00868
N23   3    0.689810    0.482195    0.560506    11.00000    0.04183    0.05352 =
         0.03653    0.00123   -0.00721   -0.01109
N24   3    1.468306    0.768060    0.712005    11.00000    0.04975    0.03356 =
         0.04656   -0.00435   -0.00362   -0.00935
N25   3    1.302284    0.704658    0.627827    11.00000    0.05859    0.04133 =
         0.03966   -0.00208   -0.00104   -0.02063
N26   3    1.419484    0.641116    0.658210    11.00000    0.05351    0.04107 =
         0.06438   -0.01216   -0.00182   -0.00615
C11   1    0.079485    0.274122    0.635108    11.00000    0.04618    0.03033 =
         0.05140    0.00050   -0.00303   -0.00379
C12   1   -0.080313    0.204314    0.636214    11.00000    0.04693    0.03463 =
         0.04050    0.00082   -0.00055   -0.00469
C13   1   -0.269003    0.200765    0.603371    11.00000    0.05937    0.04724 =
         0.04935    0.01187   -0.01223   -0.01061
AFIX  43
H13   2   -0.317926    0.243162    0.572920    11.00000   -1.20000
AFIX   0
C14   1   -0.382515    0.125500    0.620645    11.00000    0.05007    0.05230 =
         0.05371    0.00785   -0.01192   -0.01458
AFIX  43
H14   2   -0.515166    0.113556    0.603203    11.00000   -1.20000
AFIX   0
C15   1   -0.278171    0.072526    0.665241    11.00000    0.04294    0.03994 =
         0.04208   -0.00256   -0.00068   -0.00730
C16   1   -0.353571   -0.009518    0.696019    11.00000    0.05318    0.03533 =
         0.04363   -0.00221   -0.00027   -0.00695
C21   1    0.759469    0.455312    0.670559    11.00000    0.03904    0.03674 =
         0.03626    0.00217   -0.00647   -0.00472
AFIX  43
H21   2    0.827418    0.455283    0.713589    11.00000   -1.20000
AFIX   0
C22   1    0.544499    0.434491    0.588448    11.00000    0.03710    0.04297 =
         0.04155   -0.00211   -0.00842   -0.00716
AFIX  43
H22   2    0.427525    0.415400    0.563889    11.00000   -1.20000
AFIX   0
C23   1    1.019520    0.542847    0.604697    11.00000    0.03854    0.04759 =
         0.04697    0.00347   -0.00280   -0.01400
AFIX  23
H23A  2    1.098164    0.516420    0.567549    11.00000   -1.20000
H23B  2    1.103580    0.540431    0.646952    11.00000   -1.20000
AFIX   0
C24   1    0.973257    0.636651    0.586533    11.00000    0.05672    0.04678 =
         0.05469    0.00513   -0.01616   -0.01296
AFIX  23
H24A  2    0.875379    0.638504    0.547694    11.00000   -1.20000
H24B  2    0.908314    0.664487    0.625948    11.00000   -1.20000
AFIX   0
C25   1    1.167715    0.686364    0.567559    11.00000    0.08828    0.05300 =
         0.04012    0.00572   -0.01048   -0.03233
AFIX  23
H25A  2    1.245519    0.653095    0.533888    11.00000   -1.20000
H25B  2    1.127543    0.740620    0.545766    11.00000   -1.20000
AFIX   0
C26   1    1.333805    0.779223    0.660659    11.00000    0.06849    0.03648 =
         0.05179    0.00138   -0.01113   -0.01240
AFIX  43
H26   2    1.270298    0.831496    0.649081    11.00000   -1.20000
AFIX   0
C27   1    1.515532    0.682350    0.708353    11.00000    0.04376    0.03641 =
         0.05830   -0.00687   -0.00362   -0.00538
AFIX  43
H27   2    1.608337    0.655470    0.738983    11.00000   -1.20000
AFIX   0

PART -1
O1S   4   -0.023012    0.100497    0.437379    10.50000    0.13173
N3S   3   -0.050369   -0.024000    0.505946    10.50000    0.13173
C2S   1   -0.121789    0.036534    0.459017    10.50000    0.13173
AFIX  43
H2S   2   -0.256526    0.029160    0.441724    10.50000   -1.20000
AFIX   0
C4S   1   -0.177002   -0.098007    0.526238    10.50000    0.13173
AFIX 137
H4SA  2   -0.138257   -0.147742    0.499370    10.50000   -1.50000
H4SB  2   -0.321372   -0.085075    0.517905    10.50000   -1.50000
H4SC  2   -0.154717   -0.109912    0.574794    10.50000   -1.50000
AFIX   0
C5S   1    0.171037   -0.017918    0.528603    10.50000    0.13173
AFIX 137
H5SA  2    0.178225   -0.005509    0.577521    10.50000   -1.50000
H5SB  2    0.238254    0.027591    0.503328    10.50000   -1.50000
H5SC  2    0.239779   -0.071902    0.519607    10.50000   -1.50000
AFIX   0
HKLF 4

REM  tgs146_1_a.res in P2(1)/c
REM R1 =  0.0356 for    3405 Fo > 4sig(Fo)  and  0.0378 for all    3640 data
REM    244 parameters refined using      8 restraints

END

WGHT      0.0629      1.4722

REM Highest difference peak  0.952,  deepest hole -0.613,  1-sigma level  0.069
Q1    1  -0.3476 -0.2062  0.5209  11.00000  0.05    0.95
Q2    1   0.0000  0.0000  0.5000  10.50000  0.05    0.87
Q3    1   0.1959 -0.1011  0.5455  11.00000  0.05    0.34
Q4    1   0.3398  0.3483  0.7570  11.00000  0.05    0.33
Q5    1  -0.1173 -0.1456  0.5829  11.00000  0.05    0.33
Q6    1   0.1677  0.2848  0.5820  11.00000  0.05    0.26
Q7    1   0.4875  0.3957  0.6818  11.00000  0.05    0.25
Q8    1   0.9194  0.5192  0.6107  11.00000  0.05    0.24
Q9    1   0.4241  0.3357  0.6888  11.00000  0.05    0.24
Q10   1   0.4517  0.3418  0.7597  11.00000  0.05    0.21
Q11   1   0.2076  0.0426  0.5159  11.00000  0.05    0.21
Q12   1   0.6001  0.4758  0.5713  11.00000  0.05    0.20
Q13   1   0.7593  0.4972  0.5976  11.00000  0.05    0.20
Q14   1   0.5553  0.4186  0.6350  11.00000  0.05    0.19
Q15   1   0.6441  0.4413  0.6690  11.00000  0.05    0.19
Q16   1   0.5850  0.4050  0.6243  11.00000  0.05    0.19
Q17   1   0.1149  0.3043  0.6864  11.00000  0.05    0.19
Q18   1   1.3398  0.6562  0.6584  11.00000  0.05    0.19
Q19   1   1.3152  0.7402  0.6439  11.00000  0.05    0.18
Q20   1   1.5353  0.8050  0.7270  11.00000  0.05    0.18
;
_shelx_res_checksum               94543
_shelx_hkl_file
;
   1   0   0   81.70    5.45
   1   0   0   88.89    4.40
   1   0   0   85.56    4.42
  -1   0   0   88.73    4.43
   1   0   0   80.77    5.49
  -1   0   0   84.15    5.50
  -1   0   0   87.38    4.42
   2   0   0  124.83    6.48
   2   0   0  124.60    6.47
  -2   0   0  128.12    8.05
  -2   0   0  129.35    6.50
  -2   0   0  126.47    6.51
   2   0   0  123.94    8.02
   2   0   0  122.00    8.02
   3   0   0   62.88    4.06
   3   0   0   64.43    3.26
  -3   0   0   62.99    3.26
  -3   0   0   64.05    3.26
   3   0   0   58.32    4.05
  -3   0   0   65.06    4.06
   3   0   0   63.86    3.26
  -4   0   0    6.64    0.38
  -4   0   0    6.99    0.39
   4   0   0    6.60    0.51
   4   0   0    6.60    0.40
   4   0   0    6.73    0.40
  -4   0   0    6.71    0.50
   5   0   0   70.56    3.54
   5   0   0   68.74    4.41
  -5   0   0   63.59    3.52
  -5   0   0   62.58    4.39
   5   0   0   70.73    3.54
  -5   0   0   72.33    4.40
   6   0   0   16.85    1.22
  -6   0   0   19.04    1.22
  -6   0   0   15.38    1.19
   6   0   0   18.29    0.98
   6   0   0   17.43    0.98
   7   0   0    0.20    0.13
   7   0   0    0.08    0.15
  -7   0   0    0.34    0.22
  -1   1   0   14.84    0.87
  -1   1   0   12.71    0.70
  -1   1   0   12.48    0.74
  -1   1   0   13.07    0.70
   1   1   0   12.94    0.71
   1   1   0   15.56    0.88
   1   1   0   12.96    0.88
   1  -1   0   14.13    0.87
  -1  -1   0   12.19    0.71
   1  -1   0   13.48    0.70
  -1  -1   0   15.41    0.88
  -1  -1   0   14.12    0.88
   1  -1   0   12.78    0.70
  -2   1   0    0.47    0.08
  -2   1   0    0.61    0.06
   2   1   0    0.90    0.12
   2   1   0    0.56    0.07
   2   1   0    0.52    0.08
  -2   1   0    0.72    0.06
  -2   1   0    0.69    0.09
   2  -1   0    0.62    0.09
  -2  -1   0    0.53    0.09
   2  -1   0    0.65    0.08
  -2  -1   0    0.58    0.08
   2  -1   0    0.67    0.07
  -2  -1   0    0.69    0.08
   2  -1   0    0.47    0.06
  -3   1   0   39.79    1.98
   3   1   0   40.69    2.00
   3   1   0   40.12    2.00
  -3   1   0   39.07    2.47
  -3   1   0   40.84    1.98
   3   1   0   37.08    2.48
   3   1   0   36.35    2.48
  -3   1   0   35.57    2.47
   3  -1   0   35.40    2.47
   3  -1   0   40.41    1.99
   3  -1   0   39.29    1.99
  -3  -1   0   37.68    2.48
  -3  -1   0   35.54    2.48
   3  -1   0   34.59    2.47
  -3  -1   0   39.90    1.99
  -3  -1   0   40.65    1.99
  -4   1   0   30.97    2.13
   4   1   0   29.54    2.14
  -4   1   0   33.78    2.14
  -4   1   0   32.61    1.71
  -4   1   0   33.15    1.71
   4   1   0   33.85    1.73
   4   1   0   32.28    2.15
   4   1   0   32.54    1.72
  -4  -1   0   33.80    1.72
   4  -1   0   32.65    2.14
   4  -1   0   34.12    1.72
  -4  -1   0   33.60    2.15
   4  -1   0   33.73    1.72
  -4  -1   0   32.37    1.72
  -5   1   0    9.75    0.76
   5   1   0   11.20    0.63
   5   1   0   10.37    0.80
   5   1   0   11.88    0.64
  -5   1   0   11.35    0.78
   5  -1   0   10.81    0.63
  -5  -1   0   11.39    0.80
   5  -1   0   11.58    0.63
   5  -1   0   10.74    0.79
  -5  -1   0   10.28    0.61
  -6   1   0   22.22    1.42
   6   1   0   19.34    1.14
  -6   1   0   18.87    1.22
   6   1   0   20.15    1.14
   6   1   0   22.28    1.44
  -6  -1   0   23.13    1.43
   6  -1   0   19.70    1.14
   6  -1   0   18.02    1.13
   6  -1   0   21.73    1.43
  -7   1   0   19.42    1.27
   7   1   0   17.10    1.03
   7  -1   0   16.75    1.02
  -7  -1   0   18.56    1.29
   7  -1   0   17.81    1.02
   0   2   0    4.21    0.26
   0  -2   0    3.64    0.26
   0  -2   0    4.02    0.26
   1   2   0    7.96    0.40
   1   2   0    5.80    0.50
   1  -2   0    7.08    0.49
   1  -2   0    7.32    0.49
  -1  -2   0    7.83    0.40
  -1  -2   0    6.16    0.50
  -2   2   0    6.19    0.41
   2   2   0    5.78    0.34
   2   2   0    5.91    0.42
   2   2   0    7.04    0.43
   2   2   0    5.63    0.34
  -2   2   0    5.66    0.36
  -2  -2   0    5.78    0.43
   2  -2   0    5.76    0.33
   2  -2   0    5.53    0.33
   2  -2   0    5.89    0.41
  -2  -2   0    6.05    0.42
   2  -2   0    6.57    0.41
   3   2   0    1.77    0.19
  -3   2   0    1.42    0.16
   3   2   0    1.70    0.15
   3   2   0    1.72    0.20
  -3   2   0    1.59    0.17
  -3   2   0    1.60    0.10
   3   2   0    1.50    0.15
  -3   2   0    1.75    0.17
  -3   2   0    1.61    0.10
   3  -2   0    1.49    0.17
   3  -2   0    1.68    0.13
  -3  -2   0    1.87    0.20
  -3  -2   0    1.64    0.14
  -3  -2   0    1.51    0.14
   3  -2   0    1.83    0.18
  -3  -2   0    1.57    0.19
   3  -2   0    1.66    0.14
  -4   2   0   18.74    1.00
   4   2   0   18.09    0.94
  -4   2   0   17.47    0.91
   4   2   0   16.27    1.17
   4   2   0   17.97    0.94
  -4   2   0   18.31    1.16
   4   2   0   15.26    1.16
  -4  -2   0   14.96    1.16
   4  -2   0   16.20    1.16
   4  -2   0   18.50    0.93
   4  -2   0   17.02    0.93
  -4  -2   0   17.58    0.93
  -4  -2   0   17.71    0.93
  -4  -2   0   18.40    1.18
   5   2   0    2.51    0.26
  -5   2   0    2.84    0.27
  -5   2   0    2.88    0.30
   5   2   0    2.36    0.25
   5   2   0    2.76    0.35
   5  -2   0    2.71    0.31
   5  -2   0    2.49    0.24
  -5  -2   0    2.29    0.23
  -5  -2   0    2.50    0.22
  -5  -2   0    2.29    0.31
  -5  -2   0    2.73    0.34
   5  -2   0    2.64    0.25
   6   2   0    3.52    0.34
   6   2   0    3.94    0.33
  -6   2   0    3.91    0.38
  -6   2   0    4.39    0.41
   6   2   0    4.18    0.46
  -6   2   0    3.48    0.36
   6  -2   0    4.25    0.43
  -6  -2   0    4.12    0.46
   6  -2   0    4.45    0.33
   6  -2   0    4.19    0.34
  -6  -2   0    3.23    0.39
  -7   2   0    1.86    0.28
   7   2   0    1.54    0.32
  -7  -2   0    1.75    0.31
   7  -2   0    1.53    0.21
   7  -2   0    1.40    0.21
   0   3   0   -0.15    0.02
   0  -3   0   -0.11    0.03
   0  -3   0   -0.16    0.02
   1   3   0    2.13    0.15
   1   3   0    2.47    0.15
   1  -3   0    2.55    0.16
  -1  -3   0    2.26    0.15
  -1  -3   0    2.66    0.15
  -2   3   0   40.71    2.43
   2   3   0   38.71    2.45
   2   3   0   35.27    2.45
   2   3   0   38.04    1.97
  -2   3   0   37.77    2.43
  -2   3   0   36.71    2.07
   2  -3   0   38.22    1.95
   2  -3   0   37.73    2.43
   2  -3   0   40.44    2.43
   2  -3   0   37.41    1.95
  -2  -3   0   36.27    2.45
  -2  -3   0   36.65    2.45
   2  -3   0   37.96    2.07
  -3   3   0    6.68    0.38
   3   3   0    4.92    0.45
  -3   3   0    5.20    0.41
  -3   3   0    6.25    0.42
   3   3   0    6.75    0.36
   3   3   0    5.38    0.44
   3  -3   0    6.06    0.33
  -3  -3   0    6.98    0.36
  -3  -3   0    5.87    0.45
   3  -3   0    4.75    0.42
  -3  -3   0    6.20    0.35
   3  -3   0    6.32    0.34
   4   3   0    1.81    0.18
   4   3   0    1.52    0.20
  -4   3   0    1.83    0.20
  -4   3   0    1.38    0.17
  -4   3   0    1.77    0.19
   4   3   0    1.71    0.25
   4   3   0    1.79    0.18
  -4  -3   0    1.93    0.26
   4  -3   0    1.88    0.16
   4  -3   0    1.92    0.17
  -4  -3   0    1.61    0.17
  -4  -3   0    2.10    0.17
  -4  -3   0    1.45    0.20
   4  -3   0    1.33    0.21
   5   3   0   28.47    1.54
   5   3   0   29.99    1.93
  -5   3   0   27.46    1.63
  -5   3   0   28.65    1.89
  -5   3   0   30.12    1.89
   5   3   0   27.36    1.54
   5  -3   0   30.53    1.53
  -5  -3   0   26.12    1.53
  -5  -3   0   31.97    1.93
  -5  -3   0   27.23    1.53
  -5  -3   0   27.46    1.91
   5  -3   0   30.11    1.90
   5  -3   0   28.35    1.52
  -6   3   0    0.05    0.16
  -6   3   0    0.12    0.16
   6   3   0    0.07    0.13
  -6   3   0    0.03    0.13
   6   3   0    0.18    0.14
   6   3   0    0.07    0.20
   6  -3   0    0.06    0.13
  -6  -3   0    0.16    0.20
   6  -3   0   -0.06    0.16
   6  -3   0    0.14    0.12
  -6  -3   0    0.19    0.11
  -7   3   0    5.59    0.50
   7   3   0    6.51    0.61
  -7   3   0    6.24    0.53
   7  -3   0    5.24    0.45
   7  -3   0    5.76    0.45
  -7  -3   0    6.80    0.61
   0   4   0   31.00    2.00
   0   4   0   31.80    2.00
   0  -4   0   28.94    2.01
   0  -4   0   32.85    1.61
   0  -4   0   30.26    2.01
   0  -4   0   32.49    1.61
   1   4   0   33.02    2.26
   1   4   0   36.38    1.82
   1   4   0   37.12    1.82
  -1  -4   0   34.28    2.27
  -1  -4   0   37.06    1.82
  -1  -4   0   37.79    1.82
  -1  -4   0   30.47    2.26
   2   4   0  333.59   16.87
   2   4   0  309.10   20.88
   2   4   0  320.68   20.94
   2   4   0  340.23   16.86
  -2   4   0  313.10   17.72
   2  -4   0  342.43   17.76
  -2  -4   0  318.99   20.81
  -2  -4   0  332.88   16.85
  -2  -4   0  325.81   16.83
   2  -4   0  324.29   20.83
  -2  -4   0  337.62   20.86
   2  -4   0  316.80   20.82
  -3   4   0  130.44    7.19
   3   4   0  118.99    8.49
   3   4   0  136.78    8.50
  -3   4   0  135.54    8.49
   3   4   0  132.92    6.83
  -3   4   0  138.02    8.50
  -3  -4   0  124.86    8.49
  -3  -4   0  132.87    6.83
   3  -4   0  141.11    6.83
  -3  -4   0  140.24    8.50
   3  -4   0  128.69    6.83
   3  -4   0  137.38    8.47
   3  -4   0  127.76    8.47
   4   4   0   63.02    3.35
  -4   4   0   66.78    4.14
  -4   4   0   68.80    4.14
   4   4   0   68.33    4.18
   4   4   0   61.39    3.35
  -4   4   0   62.06    3.53
   4   4   0   59.91    4.17
   4  -4   0   67.16    3.33
  -4  -4   0   67.12    4.18
  -4  -4   0   62.19    4.17
  -4  -4   0   60.88    3.35
   4  -4   0   66.62    4.15
  -4  -4   0   63.86    3.35
  -5   4   0   90.92    5.10
   5   4   0   91.67    4.84
   5   4   0   94.23    6.02
  -5   4   0   97.09    5.98
   5   4   0   88.88    4.83
  -5   4   0   96.98    5.98
   5  -4   0   93.95    5.99
  -5  -4   0   90.67    4.83
   5  -4   0   93.95    4.82
   5  -4   0  100.87    4.82
  -5  -4   0   99.45    6.02
  -5  -4   0   83.90    6.00
  -5  -4   0   89.23    4.83
  -6   4   0   23.52    1.53
   6   4   0   23.38    1.59
   6   4   0   21.21    1.26
  -6   4   0   21.95    1.34
   6   4   0   22.20    1.26
  -6   4   0   22.28    1.52
  -6  -4   0   24.09    1.59
   6  -4   0   23.07    1.25
   6  -4   0   22.71    1.55
   6  -4   0   24.81    1.25
   7   4   0    0.49    0.26
  -7   4   0    0.57    0.18
  -7   4   0    0.43    0.16
  -7  -4   0    0.50    0.26
   7  -4   0    0.50    0.17
   7  -4   0    0.51    0.17
   0   5   0    0.02    0.04
   0   5   0    0.11    0.04
   0  -5   0    0.06    0.02
   0  -5   0    0.03    0.02
   0  -5   0    0.02    0.04
   1   5   0  148.63    7.53
   1   5   0  142.55    7.55
   1   5   0  142.59    9.40
  -1  -5   0  152.10    9.33
  -1  -5   0  150.97    7.51
  -1  -5   0  139.69    9.33
  -1  -5   0  146.76    7.55
   2   5   0  285.98   14.26
   2   5   0  281.44   17.76
   2   5   0  269.95   17.68
   2   5   0  277.52   14.26
  -2  -5   0  284.19   17.61
   2  -5   0  283.94   15.02
  -2  -5   0  271.41   14.26
   2  -5   0  270.23   17.61
   2  -5   0  275.42   17.62
  -2  -5   0  259.83   17.60
  -2  -5   0  277.37   14.26
   3   5   0  168.90   11.60
  -3   5   0  180.65    9.82
   3   5   0  185.55    9.33
   3   5   0  189.85    9.34
   3   5   0  181.16   11.60
   3  -5   0  178.97    9.33
  -3  -5   0  180.30   11.60
  -3  -5   0  187.02    9.34
  -3  -5   0  163.99   11.60
   3  -5   0  197.94    9.34
  -3  -5   0  182.25    9.33
   3  -5   0  181.34   11.57
   4   5   0    8.55    0.72
  -4   5   0   10.24    0.66
   4   5   0    8.34    0.71
   4   5   0   10.35    0.58
  -4   5   0   10.39    0.62
  -4   5   0   10.59    0.66
  -4  -5   0   10.17    0.58
   4  -5   0    8.81    0.68
   4  -5   0   11.58    0.55
  -4  -5   0    9.69    0.73
  -4  -5   0    9.59    0.57
   4  -5   0   10.80    0.55
   5   5   0   -0.02    0.10
  -5   5   0    0.05    0.09
   5   5   0   -0.04    0.17
  -5   5   0    0.06    0.10
   5   5   0   -0.11    0.13
  -5   5   0    0.01    0.14
   5   5   0    0.00    0.10
   5  -5   0    0.03    0.12
  -5  -5   0   -0.08    0.09
   5  -5   0    0.03    0.09
  -5  -5   0   -0.02    0.17
   5  -5   0    0.06    0.09
  -5  -5   0    0.00    0.09
  -6   5   0    0.09    0.11
  -6   5   0    0.09    0.15
  -6   5   0    0.00    0.12
   6   5   0   -0.03    0.13
   6   5   0   -0.02    0.20
   6  -5   0    0.19    0.13
  -6  -5   0    0.01    0.20
   6  -5   0    0.03    0.12
  -7   5   0    5.20    0.44
  -7   5   0    5.76    0.45
   7   5   0    5.77    0.63
   7  -5   0    4.83    0.42
  -7  -5   0    5.00    0.61
   7  -5   0    6.28    0.43
   0   6   0  145.26    9.08
   0   6   0  142.31    9.07
   0  -6   0  140.74    7.31
   0  -6   0  138.80    9.07
   0  -6   0  144.19    9.07
   0  -6   0  140.03    7.30
   1   6   0   32.03    1.58
   1   6   0   30.14    1.97
   1   6   0   32.01    1.58
   1   6   0   29.14    1.97
  -1  -6   0   31.16    1.58
  -1  -6   0   30.16    1.97
  -1  -6   0   26.53    1.97
  -1  -6   0   32.68    1.59
   2   6   0    0.40    0.10
   2   6   0    0.45    0.07
   2   6   0    0.57    0.12
   2   6   0    0.40    0.07
  -2  -6   0    0.38    0.11
  -2  -6   0    0.41    0.08
  -2  -6   0    0.44    0.11
  -2  -6   0    0.40    0.08
   2  -6   0    0.41    0.09
   3   6   0   11.47    0.63
   3   6   0   10.56    0.62
   3   6   0   10.55    0.78
   3   6   0   12.19    0.79
   3  -6   0   11.40    0.66
  -3  -6   0   10.45    0.78
  -3  -6   0   11.35    0.79
  -3  -6   0   10.96    0.62
  -3  -6   0   10.71    0.62
   3  -6   0   12.07    0.74
  -4   6   0   74.56    4.08
   4   6   0   77.80    4.83
   4   6   0   76.66    3.88
   4   6   0   66.09    4.81
   4   6   0   75.22    3.88
  -4  -6   0   77.86    3.88
   4  -6   0   84.82    3.85
  -4  -6   0   63.48    4.81
   4  -6   0   70.73    4.79
  -4  -6   0   77.21    4.83
   4  -6   0   76.33    3.85
   5   6   0   11.68    0.83
   5   6   0   10.24    0.63
   5   6   0    8.67    0.78
  -5   6   0   10.16    0.68
  -5  -6   0    9.86    0.63
   5  -6   0   11.02    0.61
   5  -6   0   10.77    0.76
   5  -6   0   11.90    0.61
  -5  -6   0   10.41    0.64
  -5  -6   0   11.30    0.79
  -5  -6   0   12.16    0.83
   6   6   0    0.32    0.24
  -6   6   0    0.39    0.18
   6  -6   0    0.42    0.13
  -6  -6   0    0.26    0.22
   6  -6   0    0.34    0.13
   7   6   0    0.48    0.28
   7  -6   0    0.10    0.15
  -7  -6   0    0.20    0.26
   7  -6   0    0.08    0.15
   0   7   0   -0.02    0.04
   0   7   0   -0.02    0.05
   0  -7   0    0.00    0.03
   0  -7   0   -0.02    0.05
   0  -7   0   -0.03    0.03
   0  -7   0   -0.04    0.05
   1   7   0    7.67    0.42
   1   7   0    8.20    0.42
   1   7   0    8.04    0.55
   1   7   0    7.96    0.54
  -1  -7   0    7.93    0.44
  -1  -7   0    8.23    0.44
  -1  -7   0    7.70    0.55
  -1  -7   0    7.47    0.54
   2   7   0    6.42    0.40
   2   7   0    7.38    0.40
  -2  -7   0    6.38    0.41
   2  -7   0    8.09    0.44
  -2  -7   0    6.42    0.40
   3   7   0   52.21    2.63
   3   7   0   43.54    3.27
   3   7   0   46.23    3.27
   3   7   0   51.74    2.63
  -3  -7   0   51.06    2.64
   3  -7   0   53.78    2.78
  -3  -7   0   55.04    2.64
  -3  -7   0   50.37    3.28
   4   7   0    4.61    0.33
  -4   7   0    4.44    0.36
   4   7   0    4.50    0.34
   4   7   0    4.41    0.42
   4   7   0    5.81    0.47
   4  -7   0    5.87    0.38
   4  -7   0    4.89    0.29
  -4  -7   0    4.48    0.34
   4  -7   0    5.34    0.30
  -4  -7   0    4.85    0.43
  -4  -7   0    5.50    0.46
  -4  -7   0    4.78    0.34
   5   7   0    2.88    0.39
   5   7   0    2.05    0.25
   5   7   0    1.64    0.26
   5   7   0    2.11    0.24
  -5   7   0    2.14    0.27
  -5  -7   0    2.40    0.31
  -5  -7   0    2.05    0.25
  -5  -7   0    2.44    0.33
  -5  -7   0    2.16    0.24
   5  -7   0    2.74    0.21
   5  -7   0    2.86    0.27
   5  -7   0    2.77    0.22
   6   7   0    7.91    0.69
  -6  -7   0    7.04    0.66
   6  -7   0    6.62    0.46
   6  -7   0    7.48    0.46
   7   7   0    0.27    0.28
  -7  -7   0    0.37    0.27
   7  -7   0    0.44    0.16
   7  -7   0    0.25    0.16
   0   8   0   90.05    5.51
   0  -8   0   85.51    5.52
   0  -8   0   81.74    4.44
   0  -8   0   86.64    4.44
   0  -8   0   87.93    5.52
   1   8   0    3.44    0.20
   1   8   0    4.06    0.30
   1   8   0    3.39    0.20
   1   8   0    3.68    0.29
  -1  -8   0    3.33    0.23
   1  -8   0    4.16    0.26
   1  -8   0    4.17    0.26
  -1  -8   0    3.93    0.30
  -1  -8   0    3.80    0.29
  -1  -8   0    3.45    0.24
   2   8   0   40.58    2.08
   2   8   0   38.80    2.60
   2   8   0   39.76    2.08
   2  -8   0   44.09    2.21
  -2  -8   0   41.57    2.09
  -2  -8   0   42.07    2.09
  -2  -8   0   39.55    2.60
  -2  -8   0   33.68    2.59
   3   8   0   43.64    2.46
   3   8   0   52.51    3.09
   3   8   0   46.54    2.47
   3   8   0   43.62    3.07
  -3  -8   0   47.97    3.08
   3  -8   0   48.71    2.61
   3  -8   0   48.24    3.03
  -3  -8   0   46.83    2.47
  -3  -8   0   47.65    2.47
   4   8   0   33.78    1.88
   4   8   0   32.38    1.87
   4   8   0   40.88    2.37
   4   8   0   31.09    2.33
  -4  -8   0   37.03    2.36
  -4  -8   0   34.29    1.88
  -4  -8   0   35.01    1.88
   4  -8   0   38.41    1.84
   4  -8   0   37.91    2.30
   4  -8   0   34.30    1.84
   5   8   0   39.84    2.34
   5   8   0   29.98    1.85
   5   8   0   33.07    1.85
   5  -8   0   33.91    2.27
  -5  -8   0   38.17    2.34
   5  -8   0   33.57    1.82
  -5  -8   0   32.85    1.86
   5  -8   0   37.26    1.82
   6   8   0    0.34    0.25
   6  -8   0    0.29    0.12
  -6  -8   0    0.18    0.23
   6  -8   0    0.18    0.13
   7   8   0    0.42    0.31
  -7  -8   0    0.70    0.31
   7  -8   0    0.27    0.15
   7  -8   0    0.32    0.16
   0  -9   0    0.25    0.05
   0  -9   0    0.17    0.08
   1   9   0   93.25    5.90
   1   9   0   92.63    5.90
  -1  -9   0   92.96    4.75
  -1  -9   0   92.88    5.90
  -1  -9   0   89.54    4.75
   1  -9   0   91.44    5.88
   2   9   0   80.66    4.33
   2   9   0   79.97    5.39
   2   9   0   80.00    4.33
   2   9   0   88.36    5.40
  -2  -9   0   84.10    4.34
  -2  -9   0   85.75    4.34
  -2  -9   0   84.77    5.40
   2  -9   0   88.58    4.58
   3   9   0   25.55    1.39
   3   9   0   24.68    1.38
   3   9   0   27.42    1.74
  -3  -9   0   25.99    1.40
   3  -9   0   27.18    1.47
  -3  -9   0   26.82    1.75
  -3  -9   0   25.44    1.40
   4   9   0    1.85    0.26
   4   9   0    1.96    0.20
   4   9   0    1.88    0.29
   4   9   0    1.87    0.21
   4  -9   0    2.32    0.15
  -4  -9   0    2.25    0.22
   4  -9   0    2.50    0.16
  -4  -9   0    2.08    0.21
  -4  -9   0    1.85    0.27
   4  -9   0    2.59    0.26
   5   9   0    0.83    0.15
   5   9   0    2.11    0.30
  -5  -9   0    1.30    0.26
   5  -9   0    1.42    0.14
   5  -9   0    1.19    0.13
  -5  -9   0    0.67    0.14
  -5  -9   0    1.10    0.17
   6   9   0    8.21    0.76
   6  -9   0    8.56    0.51
   6  -9   0    8.13    0.51
  -6  -9   0    8.05    0.74
   0 -10   0   74.25    4.74
   0 -10   0   73.65    3.81
   1  10   0   95.97    6.36
   1  10   0   92.89    6.37
  -1 -10   0   99.02    6.38
  -1 -10   0  111.62    5.13
   1 -10   0   95.42    6.35
  -1 -10   0  102.21    5.13
   2  10   0    9.09    0.58
   2  10   0    7.91    0.56
   2 -10   0    7.57    0.50
  -2 -10   0    8.17    0.58
  -2 -10   0    6.77    0.45
  -2 -10   0    6.81    0.45
   3  10   0    0.43    0.17
   3  10   0   -0.02    0.03
   3  10   0    0.01    0.07
  -3 -10   0    0.18    0.10
   3 -10   0    0.07    0.12
  -3 -10   0    0.00    0.11
  -3 -10   0   -0.03    0.14
   4  10   0    7.32    0.64
   4  10   0    8.95    0.68
   4  10   0    7.63    0.50
  -4 -10   0    8.53    0.68
  -4 -10   0    7.91    0.52
   4 -10   0    9.58    0.56
  -4 -10   0    8.84    0.53
   5  10   0   39.03    2.52
  -5 -10   0   37.75    2.52
   5 -10   0   38.63    1.96
   5 -10   0   35.39    1.96
   6  10   0   13.75    1.10
  -6 -10   0   14.15    1.10
   6 -10   0   14.94    0.80
   6 -10   0   13.62    0.79
   0 -11   0    0.20    0.09
   0 -11   0    0.32    0.06
   0 -11   0    0.26    0.06
   1  11   0   72.29    4.72
   1  11   0   73.41    4.72
   1 -11   0   70.35    4.71
  -1 -11   0   74.15    3.81
  -1 -11   0   79.71    3.81
  -1 -11   0   72.00    4.74
   2  11   0    0.93    0.16
   2  11   0    0.90    0.18
  -2 -11   0    1.36    0.14
  -2 -11   0    1.34    0.15
  -2 -11   0    1.15    0.18
   2 -11   0    1.78    0.21
   3  11   0   27.85    2.07
   3  11   0   30.62    2.09
  -3 -11   0   33.23    1.68
  -3 -11   0   30.91    1.68
  -3 -11   0   31.12    2.09
   3 -11   0   35.19    1.78
   4 -11   0    7.13    0.49
  -4 -11   0    6.55    0.46
  -4 -11   0    6.32    0.46
  -4 -11   0    7.34    0.61
   5  11   0    2.29    0.35
  -5 -11   0    1.97    0.34
   5 -11   0    2.58    0.20
   5 -11   0    2.54    0.20
   6  11   0    9.57    0.83
  -6 -11   0    8.85    0.81
   6 -11   0    9.21    0.56
   6 -11   0    9.24    0.55
   0 -12   0   36.10    2.24
   0 -12   0   32.95    1.79
   0 -12   0   34.18    1.79
   1  12   0    9.41    0.68
   1  12   0    9.53    0.67
  -1 -12   0   11.24    0.56
  -1 -12   0    9.63    0.70
   1 -12   0    8.72    0.66
  -1 -12   0   10.40    0.56
   2  12   0    3.06    0.30
   2  12   0    2.30    0.26
  -2 -12   0    2.31    0.24
  -2 -12   0    2.27    0.23
   2 -12   0    2.68    0.27
  -2 -12   0    2.54    0.30
   3  12   0    9.41    0.68
   3  12   0    7.61    0.64
  -3 -12   0    8.21    0.53
  -3 -12   0    8.90    0.67
   3 -12   0    9.13    0.57
  -3 -12   0    8.27    0.53
   4  12   0    2.95    0.45
  -4 -12   0    3.26    0.33
  -4 -12   0    3.44    0.44
  -4 -12   0    3.28    0.32
   4 -12   0    4.19    0.34
   5  12   0    0.06    0.25
   5 -12   0    0.16    0.08
   5 -12   0    0.18    0.09
  -5 -12   0    0.17    0.23
   6  12   0    1.12    0.32
  -6 -12   0    0.65    0.30
   6 -12   0    0.89    0.12
   6 -12   0    0.41    0.13
   0 -13   0    0.14    0.11
   0 -13   0    0.11    0.08
   0 -13   0    0.12    0.08
   1  13   0    4.75    0.36
   1  13   0    4.49    0.34
   1 -13   0    4.14    0.26
  -1 -13   0    4.90    0.31
  -1 -13   0    4.34    0.38
  -1 -13   0    4.19    0.31
   1 -13   0    4.55    0.26
   2  13   0   10.03    0.72
   2  13   0   11.08    0.74
  -2 -13   0    9.83    0.60
   2 -13   0   10.59    0.65
  -2 -13   0    9.51    0.60
  -2 -13   0    9.77    0.75
   3  13   0    7.47    0.60
   3  13   0    6.48    0.56
   3 -13   0    7.83    0.51
  -3 -13   0    6.98    0.47
  -3 -13   0    7.04    0.47
  -3 -13   0    7.14    0.60
   4  13   0    9.65    0.71
  -4 -13   0    8.01    0.69
  -4 -13   0    7.63    0.54
  -4 -13   0    7.20    0.54
   4 -13   0    8.70    0.58
   5  13   0    1.55    0.32
   5 -13   0    1.67    0.17
   5 -13   0    1.46    0.16
   0 -14   0   51.61    2.72
   0 -14   0   50.59    2.72
   0 -14   0   54.75    3.39
   1  14   0   65.99    4.32
   1  14   0   68.60    4.33
  -1 -14   0   67.28    3.51
   1 -14   0   68.76    3.48
  -1 -14   0   64.49    4.36
   1 -14   0   66.49    3.48
  -1 -14   0   70.64    3.51
   2  14   0    1.08    0.21
   2  14   0    1.17    0.19
  -2 -14   0    1.61    0.18
  -2 -14   0    1.46    0.23
  -2 -14   0    1.63    0.18
   2 -14   0    1.98    0.23
   3  14   0    6.45    0.54
   3  14   0    7.96    0.60
  -3 -14   0    6.16    0.47
  -3 -14   0    6.12    0.46
   3 -14   0    7.09    0.50
   4  14   0   44.88    2.71
  -4 -14   0   37.19    2.16
   4 -14   0   39.48    2.28
   5  14   0   10.49    0.86
   5 -14   0   10.04    0.54
   5 -14   0    9.34    0.54
   0 -15   0    0.34    0.13
   0 -15   0    0.38    0.10
   0 -15   0    0.35    0.10
  -1 -15   0    6.49    0.42
  -1 -15   0    6.17    0.42
   1 -15   0    6.56    0.37
   2  15   0    3.26    0.35
   2  15   0    3.55    0.39
   2 -15   0    5.00    0.39
  -2 -15   0    4.36    0.34
  -2 -15   0    4.68    0.34
   3  15   0   29.93    1.97
  -3 -15   0   27.71    1.59
  -3 -15   0   29.22    1.59
   3 -15   0   30.66    1.69
   4  15   0    0.37    0.24
   4 -15   0    0.13    0.18
   0 -16   0    1.02    0.14
   0 -16   0    1.11    0.15
  -1 -16   0    5.83    0.37
   1 -16   0    4.59    0.31
   1 -16   0    5.07    0.32
  -1 -16   0    5.40    0.37
   2  16   0    0.19    0.16
   2  16   0    0.15    0.13
  -2 -16   0    0.21    0.15
   2 -16   0    0.07    0.06
  -2 -16   0    0.24    0.14
   2 -16   0    0.03    0.06
   2 -16   0   -0.01    0.17
   3  16   0    1.40    0.26
  -3 -16   0    1.68    0.22
   3 -16   0    1.54    0.25
  -3 -16   0    1.55    0.21
   4  16   0    3.18    0.48
   4 -16   0    3.17    0.38
   0 -17   0   -0.09    0.11
   0 -17   0   -0.10    0.11
   1 -17   0    0.39    0.10
  -1 -17   0    0.36    0.14
   1 -17   0    0.34    0.11
  -1 -17   0    0.41    0.14
   2  17   0    2.48    0.28
   2  17   0    3.25    0.33
   2 -17   0    1.93    0.28
   2 -17   0    2.35    0.19
  -2 -17   0    2.07    0.25
   2 -17   0    2.46    0.19
  -2 -17   0    2.26    0.25
   3  17   0    0.38    0.21
  -3 -17   0    0.29    0.17
   3 -17   0   -0.03    0.18
   0 -18   0    2.26    0.26
   0 -18   0    2.09    0.25
  -1 -18   0   25.62    1.40
  -1 -18   0   24.76    1.39
   1 -18   0   26.16    1.36
   1 -18   0   25.84    1.36
   2  18   0    0.03    0.13
   2  18   0    0.06    0.11
   2 -18   0    0.24    0.09
   2 -18   0    0.03    0.18
  -2 -18   0   -0.04    0.16
  -2 -18   0   -0.14    0.15
  -7   0  -1    0.20    0.21
   7   0   1    0.11    0.16
   6   0   1    0.23    0.19
  -6   0  -1    0.38    0.19
   6   0   1    0.32    0.13
   6   0   1    0.21    0.13
  -5   0  -1    0.02    0.07
   5   0   1   -0.03    0.14
  -5   0  -1   -0.08    0.11
  -5   0  -1   -0.03    0.14
   5   0   1    0.07    0.10
   5   0   1   -0.06    0.10
  -4   0  -1    0.19    0.12
   4   0   1    0.25    0.08
  -4   0  -1    0.30    0.07
   4   0   1    0.41    0.09
   4   0   1    0.23    0.12
  -4   0  -1    0.37    0.08
  -3   0  -1   -0.02    0.05
   3   0   1    0.00    0.06
   3   0   1    0.03    0.06
  -3   0  -1   -0.03    0.01
   3   0   1   -0.03    0.07
   3   0   1   -0.03    0.08
  -3   0  -1   -0.04    0.08
  -3   0  -1   -0.01    0.05
   2   0   1    0.02    0.04
  -2   0  -1   -0.05    0.02
  -2   0  -1    0.10    0.04
   2   0   1    0.03    0.04
  -2   0  -1   -0.04    0.06
  -1   0  -1    0.63    0.05
   1   0   1    0.55    0.07
  -1   0  -1    0.59    0.07
   1   0   1    0.77    0.06
   1   0   1    0.47    0.07
  -1   0  -1    0.53    0.05
   1   0   1    0.47    0.05
   0   0  -1    0.01    0.01
   0   0   1    0.00    0.01
   0   0  -1    0.00    0.01
   0   0   1    0.00    0.01
   0   0   1    0.00    0.00
   0   0   1    0.01    0.02
   0   0  -1    0.00    0.01
   0   0  -1    0.00    0.00
  -1   0   1   -0.09    0.02
   1   0  -1   -0.07    0.03
   1   0  -1   -0.04    0.02
   1   0  -1   -0.10    0.03
  -1   0   1   -0.08    0.02
  -1   0   1   -0.07    0.03
   1   0  -1   -0.03    0.02
   2   0  -1    0.11    0.06
   2   0  -1    0.22    0.05
   2   0  -1    0.11    0.04
  -2   0   1    0.14    0.06
  -2   0   1    0.10    0.04
  -3   0   1    0.12    0.05
   3   0  -1    0.08    0.07
  -3   0   1    0.11    0.05
   3   0  -1    0.08    0.06
   3   0  -1    0.08    0.06
  -3   0   1    0.07    0.08
   3   0  -1    0.02    0.08
   4   0  -1    0.12    0.08
   4   0  -1    0.17    0.08
  -4   0   1    0.19    0.07
  -4   0   1    0.09    0.07
  -4   0   1    0.24    0.06
  -4   0   1    0.11    0.11
   4   0  -1    0.16    0.11
   5   0  -1    0.01    0.10
  -5   0   1    0.02    0.15
  -5   0   1    0.20    0.08
   5   0  -1    0.16    0.11
  -5   0   1   -0.09    0.12
   5   0  -1    0.11    0.15
  -6   0   1    0.08    0.15
   6   0  -1    0.17    0.13
   6   0  -1    0.19    0.13
  -6   0   1   -0.04    0.18
   6   0  -1    0.07    0.18
   7   0  -1    0.03    0.15
  -7   0   1    0.19    0.22
   7   0  -1   -0.05    0.14
  -7   1  -1   11.96    0.87
   7  -1   1   10.68    0.70
   7  -1   1   11.22    0.70
  -7  -1  -1   11.63    0.89
  -6   1  -1   34.18    2.04
   6   1   1   36.08    2.39
   6   1   1   35.77    1.91
   6   1   1   34.04    1.91
  -6   1  -1   39.48    2.38
  -6   1  -1   33.37    2.36
   6  -1   1   35.79    1.91
  -6  -1  -1   37.82    2.39
   6  -1   1   36.43    1.91
   6  -1   1   35.27    2.38
   5   1   1    1.42    0.16
   5   1   1    1.65    0.18
  -5   1  -1    1.99    0.27
  -5   1  -1    1.38    0.19
   5   1   1    2.09    0.29
   5  -1   1    2.04    0.28
   5  -1   1    1.42    0.16
   5  -1   1    1.36    0.15
  -5  -1  -1    0.94    0.16
  -5  -1  -1    1.40    0.14
  -5  -1  -1    1.75    0.23
  -4   1  -1   20.56    1.06
   4   1   1   21.17    1.08
  -4   1  -1   21.53    1.33
   4   1   1   20.78    1.07
  -4   1  -1   20.33    1.05
  -4   1  -1   17.32    1.32
   4   1   1   18.23    1.33
   4   1   1   19.89    1.34
  -4  -1  -1   20.41    1.07
   4  -1   1   21.14    1.07
   4  -1   1   20.69    1.07
  -4  -1  -1   20.00    1.07
  -4  -1  -1   21.04    1.34
   4  -1   1   19.36    1.33
  -4  -1  -1   17.63    1.33
  -3   1  -1   55.63    3.88
   3   1   1   63.44    3.13
   3   1   1   62.51    3.13
   3   1   1   56.08    3.89
  -3   1  -1   63.29    3.12
  -3   1  -1   62.92    3.12
  -3   1  -1   61.38    3.89
   3   1   1   58.64    3.89
  -3  -1  -1   55.24    3.89
   3  -1   1   57.84    3.89
  -3  -1  -1   61.72    3.13
   3  -1   1   63.42    3.13
  -3  -1  -1   66.02    3.13
  -3  -1  -1   61.20    3.90
   3  -1   1   55.71    3.89
   3  -1   1   63.43    3.13
  -2   1  -1   54.58    3.37
  -2   1  -1   53.11    2.71
   2   1   1   50.46    2.72
   2   1   1   50.70    3.38
  -2   1  -1   52.53    2.71
   2   1   1   52.97    3.38
   2   1   1   51.71    2.72
   2  -1   1   55.31    3.37
  -2  -1  -1   51.19    3.38
   2  -1   1   53.37    2.71
   2  -1   1   53.01    2.71
   2  -1   1   51.20    3.37
  -2  -1  -1   53.31    2.72
  -2  -1  -1   52.51    2.72
  -2  -1  -1   53.09    3.38
  -1   1  -1  303.14   18.89
   1   1   1  287.42   18.91
  -1   1  -1  252.20   18.88
   1   1   1  308.11   15.23
  -1   1  -1  306.81   16.04
   1  -1   1  291.26   16.03
   1  -1   1  313.26   15.20
   1  -1   1  301.66   18.90
  -1  -1  -1  288.74   18.91
  -1  -1  -1  305.80   15.23
  -1  -1  -1  301.51   18.93
   1  -1   1  289.77   18.89
   0  -1   1   16.98    0.99
   0  -1  -1   21.83    1.00
   0  -1   1   20.11    1.01
   0  -1  -1   17.90    1.00
  -1   1   1   95.74    4.83
  -1   1   1   92.66    6.01
   1   1  -1   90.99    5.99
  -1   1   1   95.92    6.03
   1   1  -1   94.55    4.85
  -1   1   1   97.38    4.83
   1   1  -1   90.98    6.02
  -1  -1   1   93.18    6.01
   1  -1  -1   91.78    6.01
   1  -1  -1   98.77    4.84
  -1  -1   1   90.15    6.02
   1  -1  -1   94.72    4.84
  -1  -1   1   95.24    4.87
   1  -1  -1   91.27    6.01
   2   1  -1   32.48    1.62
  -2   1   1   32.63    1.61
   2   1  -1   32.96    1.62
  -2   1   1   33.04    1.61
   2   1  -1   30.03    2.02
   2   1  -1   29.27    2.02
  -2   1   1   28.56    2.01
  -2   1   1   31.74    2.01
   2  -1  -1   33.40    1.62
  -2  -1   1   32.68    1.62
   2  -1  -1   29.30    2.01
  -2  -1   1   28.67    2.01
   2  -1  -1   29.34    2.01
   2  -1  -1   31.92    1.62
  -2  -1   1   33.20    1.62
  -2  -1   1   30.81    2.02
   3   1  -1   56.17    2.99
  -3   1   1   58.69    2.98
  -3   1   1   61.32    3.72
   3   1  -1   54.05    3.72
  -3   1   1   56.40    2.98
   3   1  -1   60.55    3.73
  -3   1   1   61.84    3.72
   3   1  -1   57.36    2.99
   3  -1  -1   56.48    2.99
  -3  -1   1   57.85    2.99
   3  -1  -1   56.22    2.99
   3  -1  -1   54.75    3.72
  -3  -1   1   55.64    2.99
  -3  -1   1   58.84    3.72
  -3  -1   1   58.31    3.72
   3  -1  -1   61.13    3.72
  -4   1   1   10.57    0.59
   4   1  -1   10.57    0.62
   4   1  -1   10.27    0.77
  -4   1   1   11.84    0.76
   4   1  -1   12.08    0.78
   4   1  -1   10.79    0.62
  -4   1   1   10.44    0.59
  -4   1   1   11.36    0.76
  -4  -1   1   10.39    0.60
  -4  -1   1    9.53    0.75
   4  -1  -1   11.29    0.61
  -4  -1   1   10.80    0.60
   4  -1  -1   12.14    0.77
   4  -1  -1   10.82    0.61
  -4  -1   1   11.75    0.77
  -5   1   1    2.80    0.32
   5   1  -1    2.68    0.26
  -5   1   1    2.37    0.28
   5   1  -1    3.20    0.26
   5   1  -1    2.67    0.33
   5  -1  -1    2.44    0.32
   5  -1  -1    2.98    0.25
  -5  -1   1    2.73    0.22
  -5  -1   1    3.17    0.34
   5  -1  -1    3.06    0.25
   6   1  -1   34.19    1.99
  -6   1   1   36.43    2.46
  -6   1   1   34.63    2.11
  -6   1   1   40.25    2.48
   6   1  -1   38.84    2.49
   6   1  -1   36.89    2.00
  -6  -1   1   40.18    2.49
   6  -1  -1   35.55    1.99
   6  -1  -1   38.63    2.49
   6  -1  -1   39.20    2.00
   7   1  -1    1.67    0.23
  -7   1   1    2.95    0.40
   7  -1  -1    1.96    0.23
   7  -1  -1    1.63    0.22
  -7  -1   1    1.93    0.31
  -7   2  -1    0.14    0.19
   7   2   1    0.23    0.24
   7  -2   1    0.13    0.14
   7  -2   1    0.25    0.15
  -7  -2  -1    0.33    0.23
   6   2   1    2.43    0.34
   6   2   1    3.08    0.29
  -6   2  -1    2.70    0.31
  -6   2  -1    2.78    0.35
   6   2   1    3.08    0.30
  -6   2  -1    2.58    0.32
  -6  -2  -1    3.05    0.40
   6  -2   1    3.21    0.29
   6  -2   1    3.21    0.29
   6  -2   1    1.95    0.30
   5   2   1   77.16    4.78
  -5   2  -1   74.41    4.06
   5   2   1   74.38    3.84
   5   2   1   73.62    3.84
  -5   2  -1   79.44    4.76
  -5   2  -1   73.25    4.76
  -5  -2  -1   69.15    3.83
  -5  -2  -1   69.75    3.83
   5  -2   1   73.76    4.77
  -5  -2  -1   67.94    4.77
  -5  -2  -1   79.58    4.78
   5  -2   1   71.23    3.83
   5  -2   1   76.23    3.83
  -4   2  -1   33.46    2.05
   4   2   1   30.82    2.07
   4   2   1   33.09    1.66
  -4   2  -1   32.07    1.63
   4   2   1   27.70    2.06
  -4   2  -1   31.13    2.05
   4   2   1   32.61    1.66
  -4   2  -1   32.40    1.76
  -4  -2  -1   32.25    2.07
   4  -2   1   29.06    2.05
   4  -2   1   31.62    1.65
  -4  -2  -1   32.97    1.66
  -4  -2  -1   31.95    1.66
  -4  -2  -1   27.23    2.06
   4  -2   1   33.67    1.65
   3   2   1    5.48    0.35
  -3   2  -1    6.21    0.43
  -3   2  -1    5.80    0.42
  -3   2  -1    5.44    0.32
  -3   2  -1    5.61    0.32
   3   2   1    5.61    0.35
   3   2   1    7.14    0.46
   3   2   1    6.08    0.44
  -3   2  -1    5.42    0.38
  -3  -2  -1    5.47    0.35
  -3  -2  -1    6.78    0.45
   3  -2   1    5.78    0.34
   3  -2   1    6.17    0.34
   3  -2   1    7.05    0.43
   3  -2   1    5.49    0.42
  -3  -2  -1    6.34    0.45
   2   2   1    1.79    0.15
  -2   2  -1    1.77    0.16
   2   2   1    1.34    0.14
  -2   2  -1    1.71    0.11
  -2   2  -1    1.65    0.11
  -2   2  -1    1.93    0.16
   2   2   1    2.43    0.20
  -2   2  -1    1.82    0.16
   2   2   1    1.75    0.18
   2  -2   1    2.03    0.17
   2  -2   1    2.28    0.17
  -2  -2  -1    1.82    0.19
   2  -2   1    1.84    0.13
  -2  -2  -1    1.69    0.14
   2  -2   1    1.68    0.13
  -2  -2  -1    2.27    0.19
   1   2   1  384.22   24.97
   1   2   1  389.05   24.96
   1   2   1  417.44   20.09
  -1   2  -1  402.27   21.14
   1  -2   1  436.02   21.17
  -1  -2  -1  411.41   20.09
   1  -2   1  397.94   24.90
  -1  -2  -1  371.21   20.08
  -1  -2  -1  326.43   24.95
  -1  -2  -1  368.99   24.94
   0   2  -1   88.19    5.00
   0   2  -1  101.56    6.24
   0   2   1  101.01    6.22
   0   2   1   98.86    6.22
   0  -2   1  105.70    5.01
   0  -2   1  101.75    6.23
   0  -2   1   85.38    6.23
   0  -2  -1   84.36    6.21
   0  -2   1  102.71    5.01
   0  -2  -1  101.01    6.23
   1   2  -1  544.72   26.03
   1   2  -1  505.93   32.35
   1   2  -1  529.40   32.36
  -1  -2   1  504.23   32.35
  -1  -2   1  436.57   26.02
  -1  -2   1  517.04   32.35
   2   2  -1   53.01    3.59
   2   2  -1   56.90    2.89
   2   2  -1   53.96    3.59
   2   2  -1   56.41    2.89
  -2   2   1   58.01    3.58
  -2   2   1   54.20    3.57
  -2   2   1   58.95    3.04
   2  -2  -1   55.13    3.58
  -2  -2   1   59.33    2.89
   2  -2  -1   53.86    3.58
   2  -2  -1   59.01    2.88
   2  -2  -1   59.12    2.88
  -2  -2   1   53.17    3.59
  -2  -2   1   51.44    3.59
   3   2  -1   52.58    2.71
  -3   2   1   52.52    3.35
  -3   2   1   54.61    2.85
  -3   2   1   52.57    2.68
   3   2  -1   51.33    3.37
   3   2  -1   51.42    2.71
  -3   2   1   52.93    2.68
  -3   2   1   53.90    3.35
   3   2  -1   49.09    3.37
  -3  -2   1   51.99    2.71
   3  -2  -1   53.69    2.70
  -3  -2   1   53.07    2.71
  -3  -2   1   48.22    3.36
   3  -2  -1   51.62    3.36
   3  -2  -1   54.50    2.70
  -3  -2   1   54.81    3.37
   3  -2  -1   48.49    3.35
  -4   2   1  246.08   14.34
   4   2  -1  224.07   14.31
   4   2  -1  223.86   11.51
   4   2  -1  226.87   11.51
  -4   2   1  232.08   12.16
  -4   2   1  226.09   14.33
  -4   2   1  216.84   11.50
   4   2  -1  199.62   14.30
  -4  -2   1  219.10   11.51
  -4  -2   1  219.85   11.51
   4  -2  -1  231.80   11.54
   4  -2  -1  229.46   14.30
   4  -2  -1  219.67   11.50
  -4  -2   1  209.44   14.30
  -4  -2   1  234.53   14.31
  -5   2   1   36.63    2.21
   5   2  -1   32.93    2.23
   5   2  -1   34.57    1.79
   5   2  -1   33.95    1.79
  -5   2   1   32.30    2.20
  -5   2   1   34.99    1.90
   5  -2  -1   33.71    2.22
  -5  -2   1   32.73    1.78
  -5  -2   1   35.13    2.23
   5  -2  -1   35.22    1.78
   5  -2  -1   33.83    1.78
  -5  -2   1   32.08    1.78
  -5  -2   1   30.54    2.22
  -6   2   1   43.81    2.63
  -6   2   1   37.86    2.25
   6   2  -1   38.05    2.12
   6   2  -1   37.83    2.12
   6   2  -1   39.60    2.64
   6  -2  -1   42.53    2.12
   6  -2  -1   38.31    2.63
   6  -2  -1   38.39    2.11
  -6  -2   1   42.36    2.65
  -7   2   1    0.11    0.18
  -7  -2   1    0.27    0.23
   7  -2  -1    0.11    0.14
   7  -2  -1    0.18    0.15
  -7   3  -1    6.32    0.56
   7   3   1    6.50    0.63
  -7  -3  -1    7.05    0.63
   7  -3   1    5.99    0.47
   7  -3   1    6.09    0.47
  -6   3  -1   27.81    1.85
  -6   3  -1   27.47    1.62
   6   3   1   29.91    1.91
   6   3   1   26.58    1.51
  -6   3  -1   29.67    1.86
   6   3   1   25.72    1.51
   6  -3   1   29.45    1.51
  -6  -3  -1   31.48    1.91
   6  -3   1   27.99    1.51
  -6  -3  -1   23.66    1.49
   6  -3   1   28.58    1.88
  -5   3  -1    0.19    0.14
  -5   3  -1    0.08    0.12
  -5   3  -1    0.24    0.12
   5   3   1   -0.13    0.17
   5   3   1    0.03    0.10
   5   3   1   -0.01    0.10
   5  -3   1    0.07    0.11
   5  -3   1    0.24    0.10
  -5  -3  -1    0.06    0.10
  -5  -3  -1    0.11    0.09
  -5  -3  -1    0.11    0.14
  -5  -3  -1    0.03    0.17
   5  -3   1   -0.02    0.13
   4   3   1    1.67    0.25
  -4   3  -1    1.75    0.20
  -4   3  -1    2.01    0.20
   4   3   1    1.87    0.19
  -4   3  -1    1.81    0.22
   4   3   1    1.95    0.19
   4   3   1    1.68    0.23
  -4  -3  -1    1.99    0.25
   4  -3   1    2.01    0.17
  -4  -3  -1    1.89    0.17
   4  -3   1    1.93    0.17
  -4  -3  -1    2.01    0.18
  -3   3  -1  280.99   17.75
   3   3   1  275.91   17.67
  -3   3  -1  281.27   17.75
   3   3   1  288.23   14.30
   3   3   1  278.94   14.31
   3   3   1  260.70   17.67
  -3   3  -1  289.36   15.10
   3  -3   1  276.41   14.31
   3  -3   1  293.51   14.28
  -3  -3  -1  273.00   17.72
  -3  -3  -1  266.00   17.67
  -3  -3  -1  286.93   14.34
  -3  -3  -1  269.67   14.30
   3  -3   1  258.18   17.67
   2   3   1  203.83   12.97
   2   3   1  211.34   10.43
  -2   3  -1  208.81   12.91
   2   3   1  193.52   12.87
  -2   3  -1  200.01   11.01
  -2   3  -1  199.29   12.91
  -2  -3  -1  189.75   12.91
  -2  -3  -1  209.42   10.45
   2  -3   1  209.04   12.91
   2  -3   1  200.95   10.39
   2  -3   1  191.85   12.88
   2  -3   1  213.63   11.03
  -2  -3  -1  184.33   12.89
   2  -3   1  209.52   10.38
   1   3   1  374.21   24.87
   1   3   1  405.62   20.02
   1   3   1  395.16   20.02
   1  -3   1  385.15   24.80
  -1  -3  -1  382.09   24.90
  -1  -3  -1  359.59   24.85
   1  -3   1  415.87   21.08
  -1  -3  -1  389.96   20.02
  -1  -3  -1  393.63   20.02
   0   3  -1   33.38    2.07
   0   3   1   33.67    2.07
   0   3  -1   31.98    2.07
   0   3   1   32.13    2.08
   0  -3   1   32.99    1.67
   0  -3   1   31.93    1.67
   0  -3   1   31.53    2.07
   0  -3  -1   32.41    2.07
   0  -3   1   32.59    2.08
   0  -3  -1   31.77    2.07
   1   3  -1  476.72   30.00
   1   3  -1  468.85   24.13
   1   3  -1  399.20   29.97
   1   3  -1  475.05   24.13
  -1  -3   1  493.72   24.14
  -1  -3   1  476.40   30.01
   1  -3  -1  493.55   25.38
  -1  -3   1  482.19   24.14
  -1  -3   1  455.63   29.98
  -2   3   1   17.49    1.11
   2   3  -1   17.63    1.14
   2   3  -1   17.97    0.92
   2   3  -1   17.25    1.14
  -2   3   1   17.56    1.11
  -2   3   1   16.82    0.96
  -2  -3   1   17.58    0.91
   2  -3  -1   17.78    1.12
  -2  -3   1   17.31    1.14
  -2  -3   1   16.36    1.14
   2  -3  -1   16.31    1.12
   2  -3  -1   17.34    0.89
   2  -3  -1   17.10    0.89
   3   3  -1  172.03    8.63
  -3   3   1  169.35   10.75
   3   3  -1  171.14   10.73
  -3   3   1  172.17    9.08
   3   3  -1  159.27   10.73
   3   3  -1  172.39    8.64
   3  -3  -1  172.66    8.67
   3  -3  -1  166.69    8.67
  -3  -3   1  172.95    8.63
  -3  -3   1  170.72   10.73
  -3  -3   1  163.76    8.63
   3  -3  -1  156.91   10.71
   3  -3  -1  174.26   10.72
  -3  -3   1  156.60   10.73
   4   3  -1   33.80    1.71
   4   3  -1   31.33    2.12
  -4   3   1   32.94    1.80
   4   3  -1   33.31    1.71
  -4   3   1   32.48    2.09
   4   3  -1   30.06    2.12
  -4  -3   1   33.17    2.13
  -4  -3   1   27.22    2.11
   4  -3  -1   36.15    1.69
   4  -3  -1   32.81    1.69
   4  -3  -1   30.14    2.10
  -4  -3   1   32.02    1.70
  -4  -3   1   34.26    1.70
   5   3  -1    3.71    0.30
  -5   3   1    3.89    0.34
   5   3  -1    3.46    0.30
  -5   3   1    3.89    0.32
  -5   3   1    3.80    0.33
   5   3  -1    3.61    0.40
  -5  -3   1    3.42    0.32
   5  -3  -1    4.03    0.29
  -5  -3   1    3.40    0.27
   5  -3  -1    3.76    0.36
   5  -3  -1    4.08    0.29
  -5  -3   1    3.51    0.27
  -5  -3   1    3.80    0.40
   6   3  -1   11.07    0.81
  -6   3   1   10.00    0.73
  -6   3   1    9.08    0.66
   6   3  -1    9.79    0.62
   6   3  -1    9.58    0.62
  -6   3   1   10.85    0.74
  -6  -3   1    8.52    0.59
  -6  -3   1   11.28    0.80
   6  -3  -1   10.24    0.61
   6  -3  -1   10.68    0.77
   6  -3  -1   11.17    0.62
  -7   3   1    8.73    0.67
   7   3  -1    9.13    0.75
  -7   3   1    7.45    0.64
  -7  -3   1    9.96    0.75
   7  -3  -1    7.88    0.56
   7  -3  -1    7.88    0.56
  -7   4  -1   -0.09    0.16
   7   4   1   -0.24    0.23
  -7   4  -1   -0.04    0.15
   7  -4   1   -0.12    0.15
   7  -4   1   -0.14    0.15
  -7  -4  -1   -0.07    0.24
   6   4   1    0.22    0.12
   6   4   1    0.24    0.13
  -6   4  -1    0.12    0.16
  -6   4  -1    0.29    0.13
   6   4   1    0.17    0.20
  -6   4  -1    0.20    0.15
   6  -4   1    0.12    0.12
   6  -4   1    0.12    0.12
  -6  -4  -1    0.20    0.21
   6  -4   1    0.15    0.16
   5   4   1   32.90    1.83
  -5   4  -1   35.70    2.24
  -5   4  -1   33.34    1.94
   5   4   1   36.19    2.29
   5   4   1   33.81    1.83
  -5   4  -1   35.60    2.24
  -5  -4  -1   37.24    2.29
   5  -4   1   33.23    2.26
   5  -4   1   37.46    1.82
  -5  -4  -1   32.72    1.82
  -5  -4  -1   30.87    2.27
   5  -4   1   35.42    1.82
  -5  -4  -1   33.11    1.83
  -4   4  -1   23.94    1.55
  -4   4  -1   25.56    1.36
   4   4   1   24.08    1.28
   4   4   1   19.83    1.58
   4   4   1   21.70    1.59
  -4   4  -1   24.11    1.56
   4   4   1   23.01    1.27
   4  -4   1   25.82    1.26
  -4  -4  -1   24.58    1.27
  -4  -4  -1   25.16    1.28
  -4  -4  -1   24.03    1.60
   4  -4   1   24.12    1.26
   3   4   1  146.21   10.08
  -3   4  -1  159.23   10.10
  -3   4  -1  158.40    8.54
   3   4   1  160.39   10.09
  -3   4  -1  162.93   10.08
   3   4   1  157.85    8.12
   3  -4   1  155.87    8.11
   3  -4   1  167.97    8.13
   3  -4   1  157.88   10.07
  -3  -4  -1  161.27    8.12
  -3  -4  -1  166.00   10.09
   3  -4   1  153.06   10.07
  -3  -4  -1  143.74   10.08
   2   4   1   18.32    1.37
   2   4   1   22.36    1.11
   2   4   1   22.58    1.11
  -2   4  -1   21.88    1.17
   2   4   1   17.92    1.37
   2  -4   1   18.96    1.35
  -2  -4  -1   22.59    1.11
   2  -4   1   20.94    1.35
   2  -4   1   22.69    1.17
  -2  -4  -1   22.09    1.11
  -2  -4  -1   19.41    1.37
   1   4   1  113.61    5.97
   1   4   1  115.60    7.40
   1   4   1  114.41    5.96
   1  -4   1  119.18    7.37
  -1  -4  -1  119.01    7.37
  -1  -4  -1  113.14    5.96
  -1  -4  -1  112.34    5.96
   1  -4   1  116.10    7.37
  -1  -4  -1  115.65    7.37
   0   4   1   37.50    2.33
   0   4  -1   36.62    2.34
   0   4   1   36.48    2.33
   0   4  -1   37.85    2.34
   0  -4   1   36.20    2.34
   0  -4   1   34.71    2.34
   0  -4  -1   36.12    2.34
   0  -4   1   36.19    1.88
   0  -4  -1   36.53    2.34
   0  -4   1   36.69    1.88
   0  -4  -1   35.59    1.88
   1   4  -1    1.66    0.12
   1   4  -1    1.10    0.15
   1   4  -1    1.70    0.11
  -1  -4   1    1.71    0.12
  -1  -4   1    1.24    0.15
  -1  -4   1    1.57    0.12
   2   4  -1    6.33    0.35
   2   4  -1    6.13    0.44
   2   4  -1    6.07    0.35
  -2   4   1    6.14    0.36
   2   4  -1    6.42    0.44
   2  -4  -1    6.15    0.41
  -2  -4   1    5.77    0.35
   2  -4  -1    6.16    0.37
  -2  -4   1    6.24    0.35
   2  -4  -1    5.56    0.40
  -2  -4   1    6.16    0.44
  -2  -4   1    5.98    0.44
  -3   4   1   12.19    0.81
   3   4  -1   11.73    0.85
   3   4  -1   13.38    0.68
  -3   4   1   12.72    0.72
  -3   4   1   12.69    0.81
   3   4  -1   12.25    0.86
   3  -4  -1   12.08    0.82
  -3  -4   1   12.93    0.86
  -3  -4   1   12.99    0.68
  -3  -4   1   11.15    0.84
   3  -4  -1   13.16    0.66
   3  -4  -1   11.51    0.82
   3  -4  -1   12.61    0.66
  -4   4   1   39.99    2.46
   4   4  -1   36.73    2.50
   4   4  -1   38.43    2.01
   4   4  -1   34.60    2.50
  -4   4   1   39.50    2.46
   4   4  -1   38.38    2.01
  -4   4   1   38.16    2.12
   4  -4  -1   41.45    1.99
  -4  -4   1   37.80    2.01
   4  -4  -1   37.49    2.48
  -4  -4   1   39.06    2.51
  -4  -4   1   38.80    2.01
  -4  -4   1   34.32    2.49
   4  -4  -1   39.89    1.99
  -5   4   1    1.67    0.20
  -5   4   1    1.63    0.21
   5   4  -1    1.50    0.18
   5   4  -1    2.01    0.23
   5   4  -1    1.21    0.23
  -5   4   1    1.04    0.18
   5  -4  -1    1.24    0.15
  -5  -4   1    1.31    0.15
  -5  -4   1    1.54    0.17
   5  -4  -1    1.09    0.15
  -5  -4   1    1.27    0.23
  -5  -4   1    1.30    0.22
   5  -4  -1    1.02    0.19
  -6   4   1    1.04    0.17
   6   4  -1    1.31    0.19
  -6   4   1    1.12    0.19
   6   4  -1    1.08    0.18
   6   4  -1    1.10    0.26
  -6   4   1    0.98    0.20
   6  -4  -1    1.21    0.17
   6  -4  -1    1.14    0.17
   6  -4  -1    0.75    0.19
  -6  -4   1    1.35    0.27
  -7   4   1    0.34    0.15
   7   4  -1    0.29    0.26
  -7   4   1    0.30    0.17
   7  -4  -1    0.35    0.17
   7  -4  -1    0.15    0.15
  -7  -4   1    0.38    0.25
  -7   5  -1    1.26    0.20
  -7   5  -1    1.25    0.19
   7   5   1    0.85    0.30
   7  -5   1    1.61    0.21
   7  -5   1    1.38    0.20
  -7  -5  -1    0.92    0.30
  -6   5  -1    8.91    0.62
   6   5   1    8.71    0.72
  -6   5  -1    8.51    0.61
   6   5   1    7.41    0.54
  -6  -5  -1    8.68    0.72
   6  -5   1    8.15    0.53
   6  -5   1    9.12    0.53
  -5   5  -1    0.84    0.18
   5   5   1    0.77    0.18
  -5   5  -1    0.89    0.13
   5   5   1    1.12    0.17
   5   5   1    0.85    0.22
  -5   5  -1    0.97    0.14
  -5  -5  -1    1.00    0.15
  -5  -5  -1    0.96    0.20
  -5  -5  -1    0.91    0.14
  -5  -5  -1    0.98    0.22
   5  -5   1    1.06    0.14
   5  -5   1    0.91    0.16
   5  -5   1    1.06    0.13
   4   5   1   -0.03    0.08
  -4   5  -1    0.22    0.07
  -4   5  -1    0.30    0.08
   4   5   1    0.02    0.05
  -4   5  -1    0.11    0.11
   4   5   1    0.07    0.15
   4   5   1    0.10    0.12
  -4  -5  -1    0.36    0.10
   4  -5   1    0.22    0.07
  -4  -5  -1    0.01    0.14
  -4  -5  -1    0.11    0.12
   4  -5   1    0.19    0.08
   4  -5   1    0.32    0.10
  -4  -5  -1    0.02    0.09
   3   5   1    6.69    0.43
   3   5   1    7.43    0.44
   3   5   1    7.44    0.54
  -3   5  -1    6.81    0.46
  -3  -5  -1    7.20    0.43
  -3  -5  -1    7.18    0.44
   3  -5   1    7.22    0.46
   3  -5   1    7.12    0.40
  -3  -5  -1    8.88    0.55
   3  -5   1    8.08    0.40
  -3  -5  -1    8.11    0.56
   2   5   1   44.13    2.34
   2   5   1   50.38    2.91
   2   5   1   43.31    2.91
   2   5   1   42.32    2.33
   2  -5   1   45.20    2.88
  -2  -5  -1   43.90    2.34
  -2  -5  -1   42.61    2.34
  -2  -5  -1   45.48    2.91
   2  -5   1   42.37    2.46
  -2  -5  -1   47.99    2.91
   2  -5   1   47.33    2.88
   1   5   1   72.51    3.90
   1   5   1   78.30    4.86
   1   5   1   76.27    3.90
  -1  -5  -1   76.17    4.86
  -1  -5  -1   77.45    3.91
  -1  -5  -1   76.39    3.91
  -1  -5  -1   73.98    4.86
   0   5  -1   70.41    4.46
   0   5   1   70.49    4.46
   0   5  -1   68.97    4.45
   0   5   1   70.34    4.45
   0  -5  -1   68.62    3.58
   0  -5  -1   71.65    4.45
   0  -5   1   66.84    4.45
   0  -5   1   69.72    3.59
   0  -5   1   69.43    3.58
   0  -5  -1   70.61    3.58
   0  -5  -1   66.98    4.45
   0  -5   1   69.58    4.45
   1   5  -1   53.77    3.80
   1   5  -1   62.93    3.06
   1   5  -1   64.24    3.06
  -1  -5   1   62.97    3.06
  -1  -5   1   63.80    3.06
  -1  -5   1   57.29    3.81
  -1  -5   1   50.84    3.80
   2   5  -1    0.52    0.11
   2   5  -1    0.41    0.12
   2   5  -1    0.80    0.08
  -2  -5   1    0.70    0.12
   2  -5  -1    0.47    0.07
  -2  -5   1    0.31    0.10
   2  -5  -1    0.65    0.07
   3   5  -1    8.46    0.47
   3   5  -1    7.56    0.47
   3   5  -1    7.76    0.59
  -3   5   1    8.25    0.50
   3   5  -1    9.01    0.61
  -3  -5   1    8.30    0.60
   3  -5  -1    8.14    0.44
   3  -5  -1    8.99    0.56
  -3  -5   1    7.97    0.59
  -3  -5   1    8.07    0.47
   3  -5  -1    8.05    0.44
  -3  -5   1    7.28    0.47
  -4   5   1    1.12    0.12
   4   5  -1    0.59    0.17
  -4   5   1    1.00    0.13
   4   5  -1    0.78    0.18
  -4   5   1    0.81    0.14
  -4  -5   1    0.89    0.17
  -4  -5   1    0.89    0.14
   4  -5  -1    1.04    0.11
   4  -5  -1    1.03    0.10
   4  -5  -1    1.23    0.14
  -4  -5   1    0.63    0.18
  -4  -5   1    0.56    0.11
   5   5  -1    4.21    0.31
   5   5  -1    3.56    0.43
  -5   5   1    4.13    0.35
  -5   5   1    4.48    0.32
  -5   5   1    4.39    0.32
   5   5  -1    2.94    0.39
   5   5  -1    3.29    0.30
   5  -5  -1    3.70    0.36
  -5  -5   1    3.99    0.30
   5  -5  -1    4.76    0.29
  -5  -5   1    4.09    0.43
  -5  -5   1    3.97    0.31
   5  -5  -1    4.82    0.29
  -6   5   1   -0.02    0.15
  -6   5   1    0.04    0.11
  -6   5   1   -0.08    0.12
   6   5  -1   -0.21    0.10
   6   5  -1    0.06    0.21
   6  -5  -1   -0.06    0.11
  -6  -5   1   -0.13    0.20
   6  -5  -1   -0.03    0.11
   7   5  -1    2.60    0.41
  -7   5   1    3.11    0.31
  -7   5   1    3.23    0.33
  -7  -5   1    2.98    0.41
   7  -5  -1    3.29    0.34
   7  -5  -1    3.42    0.34
   7   6   1    4.61    0.61
   7  -6   1    5.26    0.41
  -7  -6  -1    5.50    0.60
   7  -6   1    4.94    0.41
   6   6   1   -0.14    0.22
   6  -6   1    0.10    0.12
  -6  -6  -1    0.08    0.21
   6  -6   1    0.07    0.12
   5   6   1    4.94    0.39
  -5   6  -1    5.71    0.43
   5   6   1    4.79    0.49
   5   6   1    6.76    0.55
   5   6   1    5.73    0.40
  -5  -6  -1    6.63    0.55
   5  -6   1    6.51    0.38
  -5  -6  -1    5.49    0.50
  -5  -6  -1    5.89    0.40
  -5  -6  -1    5.62    0.39
   5  -6   1    6.12    0.46
   5  -6   1    5.92    0.37
   4   6   1   37.89    2.16
  -4   6  -1   38.32    2.28
   4   6   1   38.44    2.69
   4   6   1   41.24    2.16
  -4  -6  -1   43.97    2.70
  -4  -6  -1   41.48    2.69
   4  -6   1   39.66    2.13
  -4  -6  -1   39.47    2.16
   4  -6   1   45.06    2.14
   4  -6   1   45.54    2.66
   3   6   1   32.60    2.24
   3   6   1   31.26    1.80
   3   6   1   33.59    1.80
   3   6   1   37.84    2.26
   3  -6   1   38.66    2.22
  -3  -6  -1   33.76    1.81
   3  -6   1   32.25    1.77
  -3  -6  -1   34.66    2.25
  -3  -6  -1   33.31    1.81
  -3  -6  -1   34.32    2.25
   3  -6   1   34.87    1.91
   3  -6   1   35.18    1.77
   2   6   1   11.90    0.62
   2   6   1   10.68    0.78
   2   6   1   11.89    0.62
  -2  -6  -1    9.75    0.77
  -2  -6  -1   11.94    0.63
   2  -6   1   12.30    0.67
  -2  -6  -1   11.18    0.78
  -2  -6  -1   12.30    0.63
   2  -6   1   10.79    0.74
   2  -6   1   11.48    0.74
   1   6   1   22.07    1.36
   1   6   1   20.52    1.36
   1   6   1   20.39    1.09
  -1  -6  -1   20.28    1.09
  -1  -6  -1   20.78    1.36
   1  -6   1   21.32    1.34
  -1  -6  -1   20.60    1.36
  -1  -6  -1   20.48    1.09
   1  -6   1   21.62    1.34
   0   6   1   67.69    4.46
   0   6  -1   70.04    4.46
   0   6  -1   70.68    4.45
   0   6   1   70.04    4.46
   0  -6  -1   63.14    4.46
   0  -6  -1   71.99    3.59
   0  -6  -1   70.06    4.46
   0  -6   1   71.87    4.46
   0  -6   1   72.55    3.60
   0  -6   1   75.00    3.58
   0  -6   1   64.61    4.46
   1   6  -1  104.99    6.79
   1   6  -1  106.34    5.48
   1   6  -1  110.58    5.46
   1   6  -1  107.74    6.79
  -1  -6   1  108.52    5.46
  -1  -6   1  106.55    6.79
  -1  -6   1   97.44    6.79
  -1  -6   1  107.39    5.46
   2   6  -1    0.46    0.07
   2   6  -1    0.34    0.11
   2   6  -1    0.20    0.10
   2   6  -1    0.43    0.07
  -2  -6   1    0.20    0.09
  -2  -6   1    0.23    0.10
  -2  -6   1    0.50    0.09
  -2  -6   1    0.62    0.09
   3   6  -1    7.95    0.46
   3   6  -1    7.81    0.59
   3   6  -1    8.73    0.47
   3   6  -1    7.55    0.58
   3  -6  -1    7.57    0.53
  -3  -6   1    8.12    0.46
   3  -6  -1    8.76    0.49
  -3  -6   1    8.16    0.47
  -3  -6   1    7.67    0.59
  -3  -6   1    7.27    0.58
  -4   6   1   82.74    4.70
   4   6  -1   94.51    5.57
   4   6  -1   85.92    4.47
   4   6  -1   82.18    4.46
   4   6  -1   78.69    5.55
   4  -6  -1   85.63    4.44
  -4  -6   1   90.21    5.56
  -4  -6   1   87.60    4.47
   4  -6  -1   92.29    4.44
  -4  -6   1   77.92    5.55
   4  -6  -1   89.78    5.52
  -5   6   1    4.27    0.35
   5   6  -1    3.43    0.40
   5   6  -1    4.68    0.46
   5   6  -1    4.29    0.32
  -5  -6   1    4.09    0.44
  -5  -6   1    4.06    0.32
   5  -6  -1    4.77    0.29
   5  -6  -1    4.19    0.37
  -5  -6   1    3.25    0.39
  -5  -6   1    3.80    0.31
   5  -6  -1    4.71    0.29
  -6   6   1   10.89    0.77
   6   6  -1   12.21    0.94
   6  -6  -1   12.70    0.70
   6  -6  -1   12.25    0.70
  -6  -6   1   12.01    0.93
   7   6  -1   -0.06    0.27
   7  -6  -1    0.24    0.15
  -7  -6   1    0.11    0.26
   7  -6  -1    0.15    0.16
   7   7   1   10.16    0.86
   7  -7   1    8.87    0.61
   7  -7   1    9.80    0.62
  -7  -7  -1   10.06    0.85
   6   7   1   17.03    1.23
  -6  -7  -1   16.32    1.21
   6  -7   1   16.86    0.93
   6  -7   1   16.34    0.93
   5   7   1    0.47    0.17
   5   7   1    0.76    0.15
   5   7   1    0.80    0.23
  -5   7  -1    1.06    0.18
   5   7   1    0.86    0.15
  -5  -7  -1    0.70    0.19
   5  -7   1    0.86    0.15
   5  -7   1    0.74    0.12
   5  -7   1    0.78    0.12
  -5  -7  -1    0.86    0.15
  -5  -7  -1    1.02    0.24
  -5  -7  -1    0.59    0.15
   4   7   1   13.78    0.75
   4   7   1   12.63    0.95
   4   7   1   13.48    0.75
   4   7   1   11.61    0.93
  -4  -7  -1   13.57    0.76
   4  -7   1   14.15    0.72
  -4  -7  -1   13.69    0.95
   4  -7   1   11.79    0.89
   4  -7   1   15.03    0.72
  -4  -7  -1   13.73    0.76
   3   7   1  201.89   10.42
   3   7   1  192.13   12.95
   3   7   1  215.41   12.96
   3   7   1  196.03   10.42
  -3  -7  -1  178.92   12.95
  -3  -7  -1  209.29   10.42
   3  -7   1  216.74   10.97
  -3  -7  -1  211.78   12.96
  -3  -7  -1  201.54   10.42
   2   7   1  322.73   16.14
   2   7   1  309.20   16.19
   2   7   1  320.56   20.09
  -2  -7  -1  286.71   19.99
   2  -7   1  332.91   17.04
   2  -7   1  308.36   20.00
   2  -7   1  298.41   20.00
  -2  -7  -1  323.50   16.21
  -2  -7  -1  311.58   20.08
  -2  -7  -1  322.64   16.16
   1   7   1   10.02    0.68
   1   7   1    9.71    0.68
   1   7   1   10.25    0.53
   1   7   1   10.22    0.53
  -1  -7  -1    9.07    0.68
  -1  -7  -1   10.21    0.55
  -1  -7  -1   10.73    0.55
  -1  -7  -1   10.07    0.68
   1  -7   1   10.57    0.66
   1  -7   1    9.67    0.66
   0   7   1   18.97    1.20
   0   7  -1   18.75    1.20
   0   7   1   18.72    1.20
   0   7  -1   18.94    1.21
   0  -7   1   19.73    0.97
   0  -7  -1   18.95    0.97
   0  -7   1   16.77    1.21
   0  -7  -1   18.94    1.21
   0  -7  -1   16.33    1.21
   0  -7   1   18.90    1.22
   0  -7   1   20.14    0.97
   1   7  -1   21.65    1.12
   1   7  -1   21.28    1.40
   1   7  -1   21.65    1.11
   1   7  -1   23.30    1.40
  -1  -7   1   21.39    1.13
  -1  -7   1   19.62    1.40
  -1  -7   1   21.22    1.40
  -1  -7   1   21.42    1.13
   2   7  -1  470.76   29.23
   2   7  -1  453.63   23.43
   2   7  -1  439.37   23.48
  -2  -7   1  465.77   23.53
  -2  -7   1  462.82   29.27
  -2  -7   1  469.10   23.48
  -2  -7   1  406.02   29.14
   2  -7  -1  479.19   24.74
   3   7  -1  300.40   20.52
   3   7  -1  346.18   20.53
   3   7  -1  328.18   16.53
   3   7  -1  315.93   16.57
  -3  -7   1  322.22   16.51
  -3  -7   1  333.68   20.56
   3  -7  -1  346.66   17.50
   3  -7  -1  318.15   20.50
  -3  -7   1  280.53   20.51
  -3  -7   1  324.84   16.56
  -4   7   1   27.64    1.60
   4   7  -1   26.46    1.89
   4   7  -1   28.60    1.52
   4   7  -1   30.30    1.91
   4   7  -1   28.58    1.52
   4  -7  -1   29.68    1.48
  -4  -7   1   24.42    1.88
  -4  -7   1   29.97    1.91
  -4  -7   1   28.32    1.52
   4  -7  -1   27.83    1.85
  -4  -7   1   27.58    1.52
   4  -7  -1   31.73    1.48
   5   7  -1    0.17    0.15
   5   7  -1    0.22    0.12
  -5   7   1    0.27    0.13
   5   7  -1    0.31    0.13
   5   7  -1    0.49    0.21
  -5  -7   1    0.25    0.13
  -5  -7   1    0.28    0.13
   5  -7  -1    0.55    0.14
  -5  -7   1    0.28    0.20
   5  -7  -1    0.24    0.09
   5  -7  -1    0.33    0.10
  -5  -7   1    0.32    0.16
   6   7  -1   19.01    1.26
  -6   7   1   14.90    1.02
   6  -7  -1   16.27    0.94
  -6  -7   1   17.46    1.24
   6  -7  -1   17.46    0.94
   7   7  -1    8.40    0.78
  -7  -7   1    8.40    0.76
   7  -7  -1    8.06    0.54
   7  -7  -1    7.56    0.54
   7   8   1    0.44    0.31
   7  -8   1    0.66    0.17
  -7  -8  -1    0.55    0.30
   7  -8   1    0.60    0.17
   6   8   1    5.97    0.60
  -6  -8  -1    5.50    0.58
   6  -8   1    4.89    0.38
   6  -8   1    5.36    0.38
   5   8   1    7.16    0.64
   5   8   1    6.89    0.47
   5   8   1    6.74    0.47
   5  -8   1    7.79    0.44
  -5  -8  -1    8.11    0.65
  -5  -8  -1    7.26    0.49
   5  -8   1    7.12    0.43
   4   8   1   27.87    2.12
   4   8   1   30.70    1.70
   4   8   1   31.42    2.14
   4   8   1   31.29    1.70
   4  -8   1   34.95    1.81
  -4  -8  -1   31.71    1.71
  -4  -8  -1   32.70    2.14
  -4  -8  -1   33.32    1.71
   4  -8   1   31.97    1.67
   4  -8   1   34.92    1.67
   3   8   1   59.21    3.65
   3   8   1   50.73    3.64
   3   8   1   55.51    2.92
   3   8   1   54.82    2.92
   3  -8   1   58.05    3.09
  -3  -8  -1   57.47    2.93
  -3  -8  -1   57.37    3.65
  -3  -8  -1   56.91    2.93
   2   8   1    7.40    0.41
   2   8   1    7.63    0.53
   2   8   1    6.81    0.40
  -2  -8  -1    7.25    0.53
  -2  -8  -1    6.95    0.52
   2  -8   1    7.55    0.46
  -2  -8  -1    7.13    0.42
  -2  -8  -1    7.21    0.42
   2  -8   1    6.86    0.47
   1   8   1   54.96    3.54
   1   8   1   55.37    3.55
   1   8   1   55.28    2.83
   1   8   1   56.40    2.84
   1  -8   1   52.75    3.53
  -1  -8  -1   49.08    3.55
  -1  -8  -1   58.91    2.86
   1  -8   1   56.22    3.53
  -1  -8  -1   56.46    2.85
  -1  -8  -1   56.52    3.55
   0   8  -1  169.32   10.38
   0   8  -1  160.62   10.36
   0  -8   1  171.28   10.35
   0  -8   1  169.25    8.36
   0  -8   1  162.48    8.34
   0  -8  -1  147.61   10.34
   0  -8   1  146.36   10.34
   0  -8  -1  167.05   10.34
   0  -8  -1  165.77    8.34
   1   8  -1    3.96    0.33
   1   8  -1    4.52    0.24
   1   8  -1    4.61    0.24
   1   8  -1    4.21    0.32
  -1  -8   1    3.63    0.32
  -1  -8   1    4.25    0.33
  -1  -8   1    5.06    0.27
   1  -8  -1    3.77    0.29
  -1  -8   1    4.82    0.27
   2   8  -1    2.52    0.20
  -2  -8   1    3.02    0.21
  -2  -8   1    2.73    0.22
  -2  -8   1    2.42    0.27
   2  -8  -1    3.35    0.24
   3   8  -1    7.77    0.44
   3   8  -1    7.43    0.57
   3   8  -1    7.23    0.43
   3   8  -1    6.89    0.55
  -3  -8   1    8.27    0.45
   3  -8  -1    6.16    0.49
   3  -8  -1    7.73    0.47
  -3  -8   1    7.54    0.45
  -3  -8   1    7.26    0.57
   4   8  -1    0.74    0.22
   4   8  -1    0.94    0.15
   4   8  -1    0.74    0.19
   4   8  -1    0.79    0.13
   4  -8  -1    1.19    0.14
  -4  -8   1    1.15    0.16
   4  -8  -1    1.26    0.10
  -4  -8   1    1.15    0.16
   4  -8  -1    0.93    0.11
  -4  -8   1    1.22    0.23
   5   8  -1   14.09    0.82
   5   8  -1   15.02    1.06
   5   8  -1   13.63    0.82
  -5  -8   1   15.75    1.06
   5  -8  -1   15.77    0.79
   5  -8  -1   12.21    0.97
  -5  -8   1   14.48    0.83
   6   8  -1    4.55    0.55
  -6  -8   1    3.96    0.52
   6  -8  -1    4.35    0.33
   6  -8  -1    3.94    0.32
   7   8  -1    0.38    0.30
   7  -8  -1    0.62    0.17
   7  -8  -1    0.74    0.17
  -7  -8   1    0.41    0.29
   6   9   1    0.10    0.26
   6  -9   1   -0.05    0.12
   6  -9   1   -0.08    0.12
  -6  -9  -1   -0.02    0.24
   5   9   1   12.59    0.93
   5   9   1   10.68    0.70
   5  -9   1   11.73    0.66
  -5  -9  -1   10.98    0.71
  -5  -9  -1   13.18    0.93
  -5  -9  -1   11.46    0.71
   5  -9   1   12.97    0.66
   4   9   1   15.43    1.23
   4   9   1   17.24    0.99
   4   9   1   19.41    1.27
   4   9   1   16.84    0.99
  -4  -9  -1   17.37    1.00
  -4  -9  -1   18.24    1.26
   4  -9   1   20.46    0.95
   4  -9   1   17.98    0.95
   4  -9   1   19.67    1.07
  -4  -9  -1   17.41    1.00
   3   9   1    6.90    0.44
   3   9   1    7.27    0.44
   3   9   1    9.07    0.60
  -3  -9  -1    8.38    0.59
  -3  -9  -1    7.45    0.46
  -3  -9  -1    7.26    0.46
   3  -9   1    7.12    0.51
   3  -9   1    7.84    0.50
   2   9   1   94.64    5.08
   2   9   1   97.38    6.33
   2   9   1   95.45    6.33
  -2  -9  -1   99.72    5.10
   2  -9   1  104.35    5.38
  -2  -9  -1  101.24    5.10
  -2  -9  -1   98.23    6.34
   1   9   1    0.19    0.08
   1   9   1    0.14    0.10
  -1  -9  -1    0.54    0.08
  -1  -9  -1    0.38    0.07
   1  -9   1    0.27    0.06
  -1  -9  -1    0.19    0.10
   0  -9   1   32.26    2.09
   0  -9   1   32.36    1.67
   0  -9   1   33.46    1.68
   0  -9  -1   31.66    1.67
   0  -9  -1   31.94    2.09
   1   9  -1    3.01    0.26
   1   9  -1    2.43    0.26
   1  -9  -1    2.76    0.22
  -1  -9   1    3.76    0.22
  -1  -9   1    3.45    0.22
  -1  -9   1    3.20    0.27
   2   9  -1   -0.08    0.11
   2   9  -1   -0.06    0.07
   2   9  -1    0.39    0.15
   2   9  -1   -0.11    0.07
   2  -9  -1    0.34    0.11
  -2  -9   1    0.26    0.09
  -2  -9   1   -0.12    0.12
  -2  -9   1   -0.02    0.09
   3   9  -1    4.16    0.27
   3   9  -1    3.26    0.38
   3   9  -1    3.79    0.27
  -3  -9   1    3.86    0.38
  -3  -9   1    4.05    0.29
  -3  -9   1    3.92    0.30
   3  -9  -1    4.48    0.31
   4   9  -1    9.59    0.83
   4   9  -1   11.36    0.86
   4   9  -1   10.74    0.66
   4   9  -1   11.79    0.67
   4  -9  -1   12.24    0.61
  -4  -9   1   11.95    0.87
   4  -9  -1   13.12    0.61
  -4  -9   1   11.51    0.68
  -4  -9   1   11.39    0.68
   5   9  -1    2.18    0.23
   5   9  -1    2.44    0.33
  -5  -9   1    2.59    0.34
  -5  -9   1    2.13    0.24
   5  -9  -1    2.36    0.21
  -5  -9   1    2.24    0.25
   5  -9  -1    2.14    0.20
   6   9  -1    0.81    0.28
   6  -9  -1    0.68    0.14
  -6  -9   1    0.62    0.27
   6  -9  -1    0.52    0.14
   6  10   1    2.16    0.38
   6 -10   1    2.57    0.26
   6 -10   1    2.81    0.24
  -6 -10  -1    1.98    0.36
   5  10   1    0.90    0.26
  -5 -10  -1    0.71    0.24
   4  10   1   10.50    0.70
   4  10   1    7.92    0.65
   4  10   1    6.97    0.50
  -4 -10  -1    9.04    0.69
   4 -10   1    7.97    0.45
   4 -10   1    8.13    0.56
   4 -10   1    9.31    0.46
  -4 -10  -1    8.24    0.52
  -4 -10  -1    8.38    0.53
   3  10   1    0.31    0.17
   3  10   1   -0.02    0.05
  -3 -10  -1   -0.01    0.11
  -3 -10  -1    0.05    0.11
  -3 -10  -1    0.05    0.15
   3 -10   1    0.07    0.12
   2  10   1   17.78    1.15
   2  10   1   15.84    1.13
  -2 -10  -1   16.88    1.15
   2 -10   1   17.31    0.98
  -2 -10  -1   17.47    0.92
  -2 -10  -1   16.28    0.92
   1  10   1   54.91    3.41
   1  10   1   52.78    3.41
   1 -10   1   51.64    3.40
  -1 -10  -1   50.43    2.75
  -1 -10  -1   54.75    2.75
  -1 -10  -1   53.86    3.43
   0 -10   1   28.68    1.82
   0 -10   1   27.31    1.45
   0 -10  -1   28.02    1.45
   0 -10  -1   26.41    1.45
   0 -10   1   29.17    1.46
   0 -10  -1   28.08    1.81
   1  10  -1   84.55    5.32
   1  10  -1   89.02    5.32
   1 -10  -1   81.11    5.30
  -1 -10   1   81.74    4.28
  -1 -10   1   78.92    4.28
  -1 -10   1   82.47    5.33
   2  10  -1   10.65    0.74
   2  10  -1   10.10    0.72
   2 -10  -1   10.84    0.63
  -2 -10   1   10.38    0.59
  -2 -10   1    9.23    0.58
  -2 -10   1   10.59    0.74
   3  10  -1   27.26    1.79
   3 -10  -1   27.70    1.51
  -3 -10   1   25.89    1.44
  -3 -10   1   26.08    1.44
  -3 -10   1   27.24    1.80
   4  10  -1    0.02    0.19
   4  10  -1    0.11    0.15
  -4 -10   1    0.35    0.13
   4 -10  -1    0.34    0.13
  -4 -10   1    0.14    0.18
  -4 -10   1    0.13    0.12
   5  10  -1    1.05    0.26
   5 -10  -1    1.15    0.13
   5 -10  -1    1.02    0.12
  -5 -10   1    1.04    0.26
   6  10  -1    0.71    0.29
  -6 -10   1    0.41    0.27
   6 -10  -1    0.33    0.12
   6 -10  -1    0.30    0.13
   6  11   1   20.06    1.31
   6 -11   1   15.69    0.94
  -6 -11  -1   17.47    1.29
   6 -11   1   16.63    0.95
   5  11   1    0.80    0.27
   5 -11   1    1.05    0.12
   5 -11   1    0.86    0.11
  -5 -11  -1    0.66    0.26
   4  11   1   25.17    1.73
  -4 -11  -1   24.46    1.39
   4 -11   1   26.55    1.47
  -4 -11  -1   25.38    1.39
  -4 -11  -1   25.71    1.74
   3  11   1   15.61    1.11
   3  11   1   18.46    1.14
  -3 -11  -1   15.25    0.90
   3 -11   1   16.30    0.96
  -3 -11  -1   14.55    0.90
  -3 -11  -1   16.89    1.13
   2  11   1   36.13    2.47
   2  11   1   41.08    2.48
   2 -11   1   38.02    2.12
  -2 -11  -1   37.73    1.99
  -2 -11  -1   38.10    2.48
  -2 -11  -1   36.57    1.99
   1  11   1   33.92    2.01
   1  11   1   32.20    2.01
   1 -11   1   29.86    2.00
  -1 -11  -1   29.28    1.63
  -1 -11  -1   29.00    1.62
  -1 -11  -1   31.63    2.03
   0 -11  -1    1.00    0.11
   0 -11   1    0.85    0.09
   0 -11  -1    0.79    0.09
   0 -11  -1    0.95    0.13
   0 -11   1    0.82    0.12
   1  11  -1   72.81    4.52
   1  11  -1   69.66    4.52
  -1 -11   1   70.19    4.53
  -1 -11   1   72.18    3.64
  -1 -11   1   68.60    3.64
   1 -11  -1   68.94    4.50
   2  11  -1   21.40    1.45
   2  11  -1   23.34    1.46
   2 -11  -1   21.79    1.24
  -2 -11   1   21.20    1.17
  -2 -11   1   21.63    1.17
  -2 -11   1   21.59    1.46
   3  11  -1   66.09    4.71
   3  11  -1   80.63    4.73
   3 -11  -1   75.91    4.00
  -3 -11   1   71.05    3.80
  -3 -11   1   73.95    4.73
  -3 -11   1   70.49    3.80
   4  11  -1    6.87    0.60
  -4 -11   1    6.15    0.45
   4 -11  -1    7.43    0.48
  -4 -11   1    6.58    0.58
  -4 -11   1    6.13    0.45
   5  11  -1    1.37    0.30
  -5 -11   1    1.59    0.31
   5 -11  -1    1.73    0.17
   5 -11  -1    1.54    0.16
   6  11  -1    7.64    0.70
  -6 -11   1    6.31    0.66
   6 -11  -1    5.94    0.41
   6 -11  -1    5.89    0.41
   6  12   1    1.18    0.33
  -6 -12  -1    1.10    0.34
   6 -12   1    1.14    0.16
   6 -12   1    1.04    0.16
   5  12   1    8.39    0.74
   5 -12   1    7.56    0.46
   5 -12   1    8.60    0.46
  -5 -12  -1    7.37    0.72
   4  12   1    3.99    0.47
  -4 -12  -1    3.50    0.33
   4 -12   1    4.23    0.37
  -4 -12  -1    3.63    0.44
  -4 -12  -1    3.46    0.34
   3  12   1    4.29    0.42
   3  12   1    3.69    0.36
  -3 -12  -1    3.82    0.32
   3 -12   1    3.77    0.35
  -3 -12  -1    4.05    0.32
  -3 -12  -1    3.76    0.40
   2  12   1    5.68    0.46
   2  12   1    6.44    0.49
  -2 -12  -1    5.98    0.49
   2 -12   1    6.17    0.44
  -2 -12  -1    5.66    0.39
  -2 -12  -1    6.17    0.39
   1  12   1    3.47    0.30
   1  12   1    3.52    0.28
  -1 -12  -1    3.41    0.26
  -1 -12  -1    3.50    0.32
  -1 -12  -1    3.55    0.25
   1 -12   1    3.31    0.20
   1 -12   1    3.32    0.27
   1 -12   1    3.55    0.21
   0 -12  -1  211.42   10.45
   0 -12   1  193.82   12.95
   0 -12  -1  192.54   12.95
   0 -12   1  218.03   10.45
   0 -12  -1  200.79   10.41
   0 -12   1  200.96   10.42
   1  12  -1   53.03    3.40
   1  12  -1   53.82    3.41
  -1 -12   1   52.75    3.43
  -1 -12   1   54.74    2.75
   1 -12  -1   51.46    3.39
  -1 -12   1   51.58    2.75
   2  12  -1   16.55    1.20
   2  12  -1   17.42    1.21
   2 -12  -1   19.07    1.04
  -2 -12   1   18.58    0.98
  -2 -12   1   17.65    1.22
  -2 -12   1   17.99    0.98
   3  12  -1    2.98    0.37
   3  12  -1    2.64    0.32
   3 -12  -1    3.18    0.30
  -3 -12   1    2.91    0.36
  -3 -12   1    2.85    0.28
  -3 -12   1    3.41    0.28
   4  12  -1   11.96    0.81
  -4 -12   1    8.74    0.62
   4 -12  -1   10.07    0.65
  -4 -12   1    9.08    0.61
  -4 -12   1   10.32    0.80
   5  12  -1   32.11    2.15
  -5 -12   1   30.59    2.15
   5 -12  -1   33.35    1.65
   5 -12  -1   30.22    1.65
   6  12  -1    4.89    0.60
   6 -12  -1    4.19    0.32
  -6 -12   1    4.11    0.57
   6 -12  -1    4.53    0.33
   5  13   1    7.80    0.71
   5 -13   1    7.51    0.42
   5 -13   1    6.61    0.41
   4  13   1    4.86    0.55
  -4 -13  -1    5.46    0.42
  -4 -13  -1    5.76    0.42
  -4 -13  -1    5.28    0.55
   4 -13   1    6.12    0.46
   3  13   1    1.44    0.25
   3  13   1    1.29    0.22
  -3 -13  -1    2.49    0.26
  -3 -13  -1    1.73    0.26
   3 -13   1    2.38    0.25
  -3 -13  -1    1.76    0.20
   2  13   1   56.04    3.81
   2  13   1   55.91    3.81
  -2 -13  -1   63.62    3.08
  -2 -13  -1   59.61    3.08
   2 -13   1   61.79    3.26
  -2 -13  -1   56.80    3.83
   1  13   1    5.55    0.44
   1  13   1    5.88    0.43
   1 -13   1    6.03    0.34
  -1 -13  -1    6.13    0.38
  -1 -13  -1    5.60    0.47
  -1 -13  -1    6.43    0.38
   1 -13   1    6.28    0.34
   0 -13  -1   17.63    0.95
   0 -13  -1   16.96    1.19
   0 -13   1   18.02    0.96
   0 -13   1   19.06    0.96
   0 -13  -1   18.51    0.96
   0 -13   1   17.33    1.19
   1  13  -1    9.98    0.67
   1  13  -1    9.30    0.66
   1 -13  -1    8.78    0.51
   1 -13  -1   10.00    0.51
  -1 -13   1   10.46    0.56
  -1 -13   1    9.30    0.69
  -1 -13   1    9.45    0.55
   2  13  -1   13.21    0.98
   2  13  -1   13.32    0.99
  -2 -13   1   14.49    0.81
   2 -13  -1   16.15    0.87
  -2 -13   1   13.88    1.01
  -2 -13   1   14.83    0.81
   3  13  -1    1.38    0.25
   3  13  -1    1.56    0.23
  -3 -13   1    1.72    0.19
  -3 -13   1    1.80    0.19
   3 -13  -1    1.97    0.22
  -3 -13   1    1.59    0.25
   4  13  -1   12.82    0.99
  -4 -13   1   13.07    0.99
   4 -13  -1   13.86    0.82
  -4 -13   1   12.45    0.78
  -4 -13   1   13.47    0.78
   5  13  -1    0.43    0.28
   5 -13  -1    0.70    0.10
   5 -13  -1    0.56    0.09
   5  14   1    0.10    0.26
   5 -14   1    0.13    0.19
   5 -14   1    0.18    0.09
   5 -14   1    0.19    0.08
   4  14   1    3.11    0.47
  -4 -14  -1    3.73    0.36
   4 -14   1    3.62    0.39
   3  14   1    2.24    0.31
   3  14   1    2.62    0.32
  -3 -14  -1    2.71    0.30
   3 -14   1    3.31    0.33
  -3 -14  -1    2.89    0.31
   2  14   1   12.80    0.89
   2  14   1   13.88    0.91
   2 -14   1   12.98    0.81
  -2 -14  -1   12.47    0.75
  -2 -14  -1   12.70    0.93
  -2 -14  -1   12.72    0.74
   1  14   1    0.22    0.10
   1  14   1    0.20    0.09
  -1 -14  -1    0.05    0.14
  -1 -14  -1    0.19    0.11
  -1 -14  -1    0.30    0.11
   1 -14   1   -0.02    0.07
   1 -14   1    0.11    0.08
   0 -14   1   60.01    4.27
   0 -14  -1   63.38    4.27
   0 -14   1   71.56    3.44
   0 -14  -1   71.24    3.43
   0 -14  -1   65.36    3.43
   0 -14   1   66.30    3.43
   1  14  -1   -0.01    0.09
   1  14  -1   -0.04    0.11
  -1 -14   1    0.02    0.14
   1 -14  -1    0.09    0.06
  -1 -14   1    0.18    0.11
  -1 -14   1    0.22    0.11
   2  14  -1    6.81    0.55
   2  14  -1    6.98    0.58
   2 -14  -1    8.00    0.52
  -2 -14   1    7.11    0.59
  -2 -14   1    7.48    0.48
  -2 -14   1    7.97    0.48
   3  14  -1    4.41    0.47
   3  14  -1    3.96    0.42
  -3 -14   1    4.44    0.37
  -3 -14   1    4.69    0.37
   3 -14  -1    5.45    0.40
   4  14  -1    0.63    0.24
  -4 -14   1    0.60    0.18
   4 -14  -1    0.21    0.18
   5  14  -1   -0.03    0.26
   5 -14  -1    0.13    0.08
   5 -14  -1    0.25    0.07
   4  15   1    0.38    0.24
   4 -15   1    0.38    0.20
   3 -15   1    9.29    0.65
  -3 -15  -1    9.38    0.60
  -3 -15  -1    8.88    0.59
   2  15   1   39.31    2.39
   2  15   1   34.05    2.37
  -2 -15  -1   35.73    1.94
   2 -15   1   35.58    2.06
  -2 -15  -1   37.06    1.93
   1 -15   1   20.88    1.12
   1 -15   1   21.75    1.12
  -1 -15  -1   20.54    1.15
  -1 -15  -1   21.37    1.15
   0 -15   1    0.61    0.11
   0 -15   1    0.48    0.11
   0 -15   1    0.59    0.14
   0 -15  -1    0.58    0.11
   0 -15  -1    0.53    0.11
   0 -15  -1    0.55    0.14
   1  15  -1    2.35    0.21
  -1 -15   1    1.91    0.24
   1 -15  -1    1.98    0.17
  -1 -15   1    2.16    0.25
   1 -15  -1    2.55    0.18
   2  15  -1   16.33    1.06
   2  15  -1   14.85    1.04
  -2 -15   1   15.14    0.87
  -2 -15   1   14.38    0.87
   2 -15  -1   15.25    0.93
   3  15  -1    4.85    0.47
  -3 -15   1    3.40    0.36
   3 -15  -1    4.00    0.38
  -3 -15   1    3.40    0.35
   4  15  -1    1.35    0.29
   4 -15  -1    1.44    0.23
   4  16   1   17.58    1.20
   4 -16   1   14.75    1.01
   3  16   1    6.90    0.56
   3 -16   1    5.65    0.51
  -3 -16  -1    6.17    0.47
  -3 -16  -1    6.06    0.47
   2  16   1    9.86    0.75
   2  16   1   11.18    0.77
   2 -16   1   10.48    0.72
   2 -16   1   10.60    0.57
  -2 -16  -1   10.29    0.65
  -2 -16  -1   10.82    0.65
   2 -16   1   11.02    0.58
  -1 -16  -1    9.23    0.58
  -1 -16  -1    9.77    0.58
   1 -16   1   10.00    0.55
   0 -16   1   13.21    0.71
   0 -16   1   12.05    0.71
   0 -16  -1   12.89    0.71
   0 -16  -1   12.11    0.70
   1 -16  -1    5.23    0.33
  -1 -16   1    5.49    0.38
   1 -16  -1    5.19    0.33
  -1 -16   1    5.05    0.38
   2  16  -1   14.49    0.96
   2  16  -1   12.76    0.94
  -2 -16   1   14.32    0.80
   2 -16  -1   13.34    0.86
  -2 -16   1   13.31    0.80
   3  16  -1   17.87    1.17
  -3 -16   1   15.92    0.94
  -3 -16   1   15.37    0.95
   3 -16  -1   15.99    1.00
   4  16  -1   11.41    0.85
   4 -16  -1    9.14    0.69
   3  17   1    0.63    0.22
   3 -17   1    0.80    0.22
  -3 -17  -1    0.67    0.20
   2  17   1   31.55    2.22
   2  17   1   35.35    2.23
   2 -17   1   35.80    1.78
   2 -17   1   33.62    1.96
  -2 -17  -1   35.49    1.83
   2 -17   1   34.00    1.77
  -2 -17  -1   32.37    1.83
   1 -17   1    6.67    0.46
  -1 -17  -1    8.65    0.52
  -1 -17  -1    8.78    0.52
   1 -17   1    8.53    0.48
   0 -17  -1    0.44    0.13
   0 -17   1    0.53    0.13
   0 -17   1    0.62    0.13
   0 -17  -1    0.47    0.13
  -1 -17   1    0.80    0.16
  -1 -17   1    0.77    0.15
   1 -17  -1    0.74    0.12
   1 -17  -1    0.82    0.12
   2  17  -1   15.68    1.16
   2  17  -1   16.85    1.18
  -2 -17   1   17.03    0.99
   2 -17  -1   17.63    1.06
   2 -17  -1   18.25    0.91
  -2 -17   1   18.25    0.99
   3  17  -1   18.99    1.29
   3 -17  -1   18.10    1.12
  -3 -17   1   17.83    1.06
   2  18   1    0.28    0.11
   2 -18   1    0.25    0.10
   2 -18   1    0.25    0.20
  -2 -18  -1   -0.01    0.15
   2 -18   1    0.25    0.09
  -2 -18  -1    0.26    0.17
  -1 -18  -1    3.54    0.33
  -1 -18  -1    3.53    0.32
   1 -18   1    3.08    0.28
   1 -18   1    3.50    0.28
   0 -18  -1    6.46    0.43
   0 -18  -1    6.33    0.43
   0 -18   1    7.10    0.44
   0 -18   1    6.21    0.43
  -1 -18   1    3.95    0.35
  -1 -18   1    4.07    0.35
   1 -18  -1    3.74    0.29
   1 -18  -1    3.95    0.29
   2  18  -1    1.16    0.17
   2  18  -1    1.39    0.20
   2 -18  -1    1.47    0.16
   2 -18  -1    1.34    0.24
  -2 -18   1    1.24    0.21
   2 -18  -1    1.76    0.16
  -2 -18   1    1.29    0.21
   7   0   2    9.64    0.67
  -7   0  -2   11.73    0.85
   6   0   2   18.38    1.38
  -6   0  -2   21.64    1.39
  -6   0  -2   18.77    1.36
   6   0   2   20.09    1.11
   6   0   2   21.02    1.11
   5   0   2   36.69    2.44
  -5   0  -2   39.82    2.44
  -5   0  -2   34.23    1.94
   5   0   2   37.75    1.96
   5   0   2   37.16    1.96
  -4   0  -2   40.82    2.18
   4   0   2   41.57    2.19
  -4   0  -2   42.74    2.73
  -4   0  -2   42.62    2.18
   4   0   2   41.94    2.19
   4   0   2   41.84    2.73
  -3   0  -2   55.03    2.80
   3   0   2   54.21    2.81
   3   0   2   55.75    3.49
   3   0   2   54.16    2.81
  -3   0  -2   55.76    3.49
   3   0   2   50.64    3.49
  -3   0  -2   53.83    2.80
  -2   0  -2   32.13    1.60
   2   0   2   27.12    1.99
   2   0   2   31.47    1.60
  -2   0  -2   27.83    1.99
  -2   0  -2   32.28    1.60
   2   0   2   32.37    1.60
  -1   0   2  669.85   42.44
   1   0  -2  659.54   42.44
   2   0  -2   95.64    6.38
   2   0  -2  100.87    5.13
   2   0  -2   95.64    6.37
  -2   0   2  101.55    5.13
  -2   0   2  104.05    5.15
   2   0  -2  100.46    5.13
  -2   0   2  100.34    6.38
  -3   0   2    8.03    0.44
   3   0  -2    8.12    0.44
  -3   0   2    7.00    0.55
   3   0  -2    8.23    0.44
  -3   0   2    8.15    0.44
  -4   0   2    1.19    0.16
  -4   0   2    0.92    0.14
   4   0  -2    0.84    0.11
   4   0  -2    1.00    0.15
   4   0  -2    0.80    0.11
  -4   0   2    1.00    0.10
  -4   0   2    1.01    0.11
   5   0  -2  118.03    7.50
  -5   0   2  114.68    6.03
   5   0  -2  117.10    6.03
  -5   0   2  111.16    7.49
   5   0  -2  119.09    6.03
  -5   0   2  120.60    7.50
   6   0  -2   15.27    0.90
   6   0  -2   15.88    1.13
  -6   0   2   15.19    1.10
  -6   0   2   16.55    1.13
   6   0  -2   16.37    0.90
  -7   0   2   -0.01    0.21
   7   0  -2   -0.16    0.16
   7   0  -2    0.19    0.15
  -7   1  -2    8.21    0.65
   7  -1   2    6.69    0.52
   7  -1   2    7.28    0.52
  -7  -1  -2    8.13    0.68
   6   1   2   46.84    2.52
   6   1   2   49.45    3.15
   6   1   2   45.71    2.52
  -6   1  -2   44.34    3.11
  -6   1  -2   50.38    3.13
   6  -1   2   47.66    2.52
   6  -1   2   46.11    2.52
   6  -1   2   47.23    3.13
  -6  -1  -2   51.98    3.14
  -5   1  -2   29.69    2.04
   5   1   2   29.75    1.65
  -5   1  -2   33.17    2.05
  -5   1  -2   29.67    1.75
   5   1   2   30.65    1.65
   5   1   2   33.88    2.06
   5  -1   2   30.36    1.64
   5  -1   2   32.92    2.05
   5  -1   2   28.85    1.64
  -5  -1  -2   33.97    2.06
  -5  -1  -2   27.58    1.63
   4   1   2   16.07    1.22
  -4   1  -2   19.58    1.22
  -4   1  -2   18.30    0.96
  -4   1  -2   18.31    0.97
  -4   1  -2   18.68    1.05
   4   1   2   18.30    0.98
   4   1   2   18.30    0.98
  -4   1  -2   17.88    1.21
   4   1   2   18.04    1.23
   4  -1   2   18.75    0.98
  -4  -1  -2   17.83    0.97
  -4  -1  -2   16.79    1.22
  -4  -1  -2   18.69    1.23
  -4  -1  -2   18.41    0.98
   4  -1   2   18.21    1.22
   4  -1   2   19.05    0.98
   3   1   2    0.51    0.08
   3   1   2    0.41    0.10
  -3   1  -2    0.46    0.06
  -3   1  -2    0.23    0.09
  -3   1  -2    0.23    0.05
  -3   1  -2    0.40    0.09
   3   1   2    0.25    0.09
  -3   1  -2    0.18    0.08
   3   1   2    0.25    0.07
   3  -1   2    0.39    0.07
  -3  -1  -2    0.32    0.10
  -3  -1  -2    0.30    0.06
  -3  -1  -2    0.50    0.08
   3  -1   2    0.22    0.08
   3  -1   2    0.31    0.07
   3  -1   2    0.37    0.10
  -3  -1  -2    0.39    0.10
  -2   1  -2  128.84    7.27
  -2   1  -2  129.66    6.93
   2   1   2  129.02    8.55
  -2   1  -2  135.88    6.89
   2   1   2  135.50    6.92
   2   1   2  135.18    6.91
   2   1   2  137.84    8.55
  -2   1  -2  134.44    8.59
   2  -1   2  130.55    6.94
   2  -1   2  127.76    8.55
  -2  -1  -2  131.94    6.88
  -2  -1  -2  138.29    8.55
  -2  -1  -2  133.13    8.59
   2  -1   2  136.99    6.91
  -2  -1  -2  135.99    6.91
   2  -1   2  142.50    8.61
   1   1   2    4.04    0.22
  -1   1  -2    3.61    0.24
  -1   1  -2    3.50    0.21
  -1   1  -2    3.90    0.21
   1   1   2    4.58    0.28
   1  -1   2    3.89    0.22
   1  -1   2    3.46    0.22
   1  -1   2    4.68    0.27
   1  -1   2    3.77    0.24
   1  -1   2    4.18    0.27
  -1  -1  -2    4.35    0.28
  -1  -1  -2    3.57    0.22
   0   1   2  151.28    9.29
   0   1  -2  150.42    9.30
   0   1  -2  139.53    7.47
   0   1   2  126.94    7.46
   0  -1  -2  152.36    7.47
   0  -1   2  143.95    7.47
   0  -1   2  148.96    7.48
   0  -1  -2  145.77    9.29
   0  -1   2  143.60    9.28
   0  -1  -2  146.02    7.47
  -1   1   2  301.36   18.82
  -1   1   2  289.13   18.81
   1   1  -2  262.59   15.15
   1   1  -2  300.40   18.85
  -1  -1   2  290.00   18.83
   1  -1  -2  299.94   18.81
  -1  -1   2  296.82   15.15
   1  -1  -2  305.33   15.13
   1  -1  -2  299.32   18.82
  -1  -1   2  297.09   18.83
   2   1  -2   57.20    2.94
  -2   1   2   58.23    2.93
  -2   1   2   57.81    3.65
  -2   1   2   55.21    3.65
   2   1  -2   56.42    3.66
   2   1  -2   55.30    3.66
  -2   1   2   57.42    2.93
   2   1  -2   57.72    2.94
  -2  -1   2   57.46    2.94
  -2  -1   2   53.58    3.66
  -2  -1   2   59.34    3.66
   2  -1  -2   54.70    3.65
   2  -1  -2   55.44    3.65
   2  -1  -2   59.78    2.94
   2  -1  -2   58.29    2.94
  -2  -1   2   58.42    2.94
  -3   1   2   23.14    1.40
   3   1  -2   20.71    1.13
   3   1  -2   20.54    1.41
   3   1  -2   23.14    1.41
  -3   1   2   22.24    1.40
   3   1  -2   20.78    1.13
  -3   1   2   20.20    1.12
  -3   1   2   21.01    1.12
   3  -1  -2   22.97    1.41
   3  -1  -2   20.70    1.13
   3  -1  -2   20.52    1.13
  -3  -1   2   21.06    1.13
   3  -1  -2   19.43    1.40
  -3  -1   2   21.06    1.13
  -3  -1   2   22.47    1.41
  -3  -1   2   22.82    1.41
   4   1  -2   85.24    4.27
   4   1  -2   86.10    4.27
  -4   1   2   84.57    4.25
  -4   1   2   75.99    5.29
   4   1  -2   73.26    5.30
   4   1  -2   77.65    5.30
  -4   1   2   85.88    5.30
  -4   1   2   83.27    4.25
   4  -1  -2   77.40    5.30
  -4  -1   2   83.04    4.26
  -4  -1   2   87.10    4.26
   4  -1  -2   84.71    4.26
   4  -1  -2   84.93    4.26
  -4  -1   2   85.83    5.31
   5   1  -2    1.41    0.21
  -5   1   2    1.78    0.23
   5   1  -2    0.94    0.15
  -5   1   2    1.51    0.21
   5   1  -2    1.25    0.16
   5  -1  -2    1.77    0.21
  -5  -1   2    1.27    0.21
  -5  -1   2    1.21    0.14
   5  -1  -2    0.75    0.14
   5  -1  -2    1.23    0.16
   6   1  -2    1.34    0.27
   6   1  -2    1.83    0.21
  -6   1   2    2.23    0.29
  -6   1   2    1.58    0.23
   6   1  -2    1.69    0.20
   6  -1  -2    2.26    0.23
   6  -1  -2    1.72    0.19
  -6  -1   2    2.31    0.30
   6  -1  -2    1.41    0.26
   7   1  -2   19.92    1.22
  -7   1   2   24.04    1.52
   7  -1  -2   20.63    1.22
  -7  -1   2   23.86    1.54
   7  -1  -2   20.75    1.21
   7   2   2    0.63    0.28
  -7   2  -2    0.40    0.20
  -7  -2  -2    0.64    0.24
   7  -2   2    0.42    0.17
   7  -2   2    0.45    0.16
   6   2   2    1.56    0.26
  -6   2  -2    1.14    0.21
  -6   2  -2    0.79    0.17
   6   2   2    0.67    0.16
   6   2   2    0.45    0.14
  -6  -2  -2    1.16    0.25
   6  -2   2    0.72    0.16
   6  -2   2    0.58    0.14
   5   2   2    0.56    0.19
   5   2   2    0.45    0.13
  -5   2  -2    0.44    0.16
   5   2   2    0.38    0.11
  -5   2  -2    0.42    0.14
  -5   2  -2    0.70    0.16
   5  -2   2    0.35    0.16
   5  -2   2    0.51    0.12
  -5  -2  -2    0.27    0.15
  -5  -2  -2    0.39    0.18
  -5  -2  -2    0.57    0.12
   5  -2   2    0.56    0.12
  -5  -2  -2    0.33    0.10
  -4   2  -2    9.30    0.50
   4   2   2    9.72    0.54
  -4   2  -2    9.31    0.58
   4   2   2    9.67    0.69
   4   2   2    9.11    0.54
  -4   2  -2   10.16    0.66
   4   2   2    8.19    0.66
  -4   2  -2    9.45    0.66
  -4  -2  -2   10.07    0.69
  -4  -2  -2    8.70    0.67
   4  -2   2    9.00    0.53
   4  -2   2    9.75    0.53
  -4  -2  -2    9.15    0.53
   4  -2   2    9.99    0.67
  -4  -2  -2    9.33    0.53
   3   2   2    2.22    0.23
  -3   2  -2    2.51    0.21
   3   2   2    2.34    0.18
  -3   2  -2    2.77    0.22
  -3   2  -2    2.44    0.15
  -3   2  -2    2.37    0.20
   3   2   2    2.27    0.24
  -3   2  -2    2.25    0.15
  -3  -2  -2    2.17    0.24
   3  -2   2    2.61    0.22
  -3  -2  -2    2.38    0.23
   3  -2   2    2.31    0.17
  -3  -2  -2    2.30    0.18
   3  -2   2    2.43    0.17
  -3  -2  -2    2.48    0.18
   3  -2   2    2.24    0.21
  -2   2  -2    4.27    0.22
  -2   2  -2    4.32    0.22
   2   2   2    4.15    0.25
   2   2   2    3.00    0.30
  -2   2  -2    3.99    0.29
   2   2   2    3.45    0.30
   2   2   2    3.09    0.24
  -2   2  -2    3.86    0.29
   2  -2   2    4.48    0.23
  -2  -2  -2    3.69    0.31
   2  -2   2    4.41    0.23
  -2  -2  -2    4.46    0.24
   2  -2   2    3.62    0.29
   1   2   2  312.49   20.52
   1   2   2  338.95   16.52
   1   2   2  309.62   20.50
  -1   2  -2  309.68   17.38
  -1   2  -2  321.11   20.48
  -1   2  -2  334.16   20.48
   1   2   2  278.80   16.50
   1  -2   2  339.78   16.47
  -1  -2  -2  304.36   20.49
   1  -2   2  340.86   16.47
   1  -2   2  323.80   20.48
  -1  -2  -2  337.25   16.53
   1  -2   2  300.75   17.37
   1  -2   2  323.42   20.49
  -1  -2  -2  331.53   16.51
  -1  -2  -2  319.07   20.53
   0   2  -2   87.49    4.39
   0   2   2   86.06    4.38
   0   2  -2   84.65    5.46
   0   2   2   89.86    5.45
   0   2   2   75.39    5.45
   0   2  -2   82.74    4.39
   0   2   2   86.22    4.38
   0  -2   2   84.69    5.45
   0  -2  -2   86.00    4.38
   0  -2   2   81.44    5.43
   0  -2  -2   86.75    5.45
   0  -2   2   83.73    4.38
   0  -2  -2   85.40    4.39
   0  -2   2   87.70    4.39
   1   2  -2  648.66   41.18
   1   2  -2  641.17   41.18
   2   2  -2   78.79    5.13
   2   2  -2   77.50    5.13
  -2   2   2   79.30    5.11
  -2   2   2   80.86    5.12
   2   2  -2   83.44    4.13
   2   2  -2   83.41    4.13
  -2   2   2   86.67    4.34
  -2  -2   2   76.36    5.13
   2  -2  -2   84.04    4.11
  -2  -2   2   83.21    4.13
   2  -2  -2   78.49    5.12
   2  -2  -2   81.48    4.13
   2  -2  -2   80.41    5.12
  -2  -2   2   79.71    5.13
  -2  -2   2   67.59    4.12
  -3   2   2    3.94    0.27
   3   2  -2    3.19    0.28
   3   2  -2    3.17    0.23
  -3   2   2    3.20    0.19
   3   2  -2    2.94    0.23
  -3   2   2    3.58    0.27
  -3   2   2    3.20    0.19
   3   2  -2    3.99    0.30
   3  -2  -2    3.29    0.27
  -3  -2   2    3.73    0.29
  -3  -2   2    3.27    0.22
  -3  -2   2    3.06    0.22
   3  -2  -2    3.07    0.21
  -3  -2   2    3.32    0.29
   3  -2  -2    3.92    0.28
   3  -2  -2    3.45    0.21
  -4   2   2    0.77    0.09
  -4   2   2    0.80    0.15
   4   2  -2    1.04    0.17
   4   2  -2    0.85    0.12
   4   2  -2    0.75    0.16
  -4   2   2    0.37    0.13
   4   2  -2    0.67    0.11
   4  -2  -2    0.73    0.14
  -4  -2   2    1.01    0.12
   4  -2  -2    0.62    0.11
  -4  -2   2    0.84    0.17
   4  -2  -2    0.71    0.11
  -4  -2   2    0.73    0.11
  -4  -2   2    1.02    0.16
   5   2  -2    0.83    0.21
  -5   2   2    0.67    0.16
  -5   2   2    1.02    0.19
   5   2  -2    0.96    0.15
   5   2  -2    1.42    0.17
  -5   2   2    1.48    0.18
  -5  -2   2    1.39    0.16
   5  -2  -2    1.00    0.14
  -5  -2   2    1.43    0.15
   5  -2  -2    0.73    0.18
  -5  -2   2    1.03    0.21
   5  -2  -2    1.16    0.14
  -5  -2   2    0.93    0.19
  -6   2   2    0.12    0.13
   6   2  -2    0.07    0.14
   6   2  -2    0.10    0.20
  -6   2   2    0.13    0.14
   6   2  -2    0.14    0.14
  -6   2   2    0.14    0.16
  -6  -2   2    0.01    0.20
   6  -2  -2    0.15    0.13
   6  -2  -2    0.20    0.13
  -6  -2   2   -0.03    0.14
   6  -2  -2    0.25    0.18
  -7   2   2    0.22    0.19
  -7  -2   2    0.24    0.23
   7  -2  -2    0.16    0.15
   7  -2  -2   -0.03    0.15
  -7   3  -2    7.92    0.65
   7   3   2    8.57    0.72
   7  -3   2    7.57    0.54
   7  -3   2    7.23    0.54
  -7  -3  -2    9.15    0.73
  -6   3  -2    0.44    0.17
   6   3   2    0.50    0.22
   6   3   2    0.19    0.13
  -6   3  -2    0.43    0.15
   6   3   2    0.40    0.14
   6  -3   2    0.27    0.13
   6  -3   2    0.23    0.14
  -6  -3  -2    0.34    0.21
  -6  -3  -2    0.28    0.11
   6  -3   2    0.42    0.19
  -5   3  -2   12.49    0.83
   5   3   2   11.49    0.68
  -5   3  -2   13.05    0.83
   5   3   2   11.90    0.87
  -5   3  -2   11.41    0.74
   5   3   2   11.30    0.68
   5  -3   2   11.51    0.84
   5  -3   2   11.87    0.67
  -5  -3  -2   11.45    0.68
  -5  -3  -2   11.49    0.67
  -5  -3  -2   12.40    0.87
  -5  -3  -2   10.71    0.85
   5  -3   2   12.87    0.68
  -4   3  -2    3.62    0.31
   4   3   2    4.33    0.38
   4   3   2    3.80    0.28
  -4   3  -2    3.92    0.32
  -4   3  -2    4.34    0.33
   4   3   2    3.72    0.35
   4   3   2    3.74    0.28
  -4  -3  -2    3.90    0.27
   4  -3   2    4.35    0.34
   4  -3   2    3.97    0.27
  -4  -3  -2    4.53    0.38
   4  -3   2    3.79    0.26
  -4  -3  -2    4.40    0.36
  -4  -3  -2    3.96    0.27
   3   3   2    2.04    0.18
  -3   3  -2    2.25    0.20
  -3   3  -2    2.62    0.20
   3   3   2    2.05    0.23
   3   3   2    2.57    0.19
   3   3   2    1.84    0.25
  -3  -3  -2    1.70    0.23
   3  -3   2    2.69    0.17
   3  -3   2    2.09    0.21
  -3  -3  -2    2.08    0.24
  -3  -3  -2    2.21    0.18
   3  -3   2    2.12    0.20
   2   3   2   99.08    4.77
  -2   3  -2   86.32    5.02
   2   3   2   87.49    5.92
   2   3   2   94.73    5.93
  -2   3  -2   90.70    5.94
  -2   3  -2   95.49    5.92
   2  -3   2   92.72    5.91
   2  -3   2   90.04    5.91
   2  -3   2   91.71    4.76
  -2  -3  -2   94.65    5.93
  -2  -3  -2   94.73    5.93
   2  -3   2   90.32    4.76
  -2  -3  -2   95.10    4.77
   2  -3   2   92.84    5.02
  -1   3  -2  287.27   18.06
  -1   3  -2  288.70   18.06
   1   3   2  284.25   14.57
   1   3   2  286.02   14.59
   1   3   2  266.70   18.10
   1  -3   2  295.82   14.51
   1  -3   2  307.12   15.41
   1  -3   2  293.58   14.51
  -1  -3  -2  296.42   14.60
  -1  -3  -2  268.68   18.10
   1  -3   2  283.40   18.08
   1  -3   2  269.47   18.08
  -1  -3  -2  247.04   18.11
  -1  -3  -2  284.96   14.58
   0   3  -2   88.93    5.72
   0   3  -2   90.11    4.60
   0   3   2   88.86    5.72
   0   3  -2   86.85    5.72
   0   3  -2   92.71    4.60
   0   3   2   87.18    5.73
   0  -3  -2   89.52    4.60
   0  -3   2   92.82    4.61
   0  -3   2   83.29    5.73
   0  -3  -2   90.21    4.61
   0  -3  -2   91.06    5.73
   0  -3  -2   88.18    5.72
   0  -3   2   89.63    5.72
   0  -3   2   90.24    4.62
   1   3  -2  210.62   13.40
   1   3  -2  212.09   10.79
   1   3  -2  204.97   13.41
   1  -3  -2  202.38   13.36
   1  -3  -2  215.64   11.34
  -1  -3   2  202.20   13.40
  -1  -3   2  206.77   10.81
  -1  -3   2  216.98   10.80
  -1  -3   2  215.92   13.45
   1  -3  -2  204.86   13.36
   2   3  -2   92.17    6.25
   2   3  -2   89.03    6.25
  -2   3   2   99.29    6.25
  -2   3   2   93.08    6.24
  -2   3   2  101.96    5.32
   2   3  -2  102.30    5.03
  -2  -3   2  102.94    5.03
   2  -3  -2  106.35    5.03
   2  -3  -2   95.16    6.23
  -2  -3   2   88.72    6.25
  -2  -3   2  101.08    6.25
   2  -3  -2  102.30    5.03
   2  -3  -2   95.67    6.23
  -3   3   2   34.07    2.14
   3   3  -2   30.14    2.16
   3   3  -2   33.18    1.74
  -3   3   2   34.83    1.83
  -3   3   2   33.65    2.14
   3   3  -2   33.84    1.74
   3   3  -2   33.42    2.17
  -3  -3   2   32.86    2.16
  -3  -3   2   32.83    1.74
  -3  -3   2   31.24    2.16
   3  -3  -2   33.15    1.72
   3  -3  -2   31.47    2.14
   3  -3  -2   35.35    1.72
  -3  -3   2   33.29    1.74
   3  -3  -2   34.10    2.15
  -4   3   2   15.79    1.02
  -4   3   2   15.54    1.02
   4   3  -2   13.73    1.04
   4   3  -2   15.49    1.06
  -4   3   2   15.83    0.89
   4   3  -2   15.26    0.84
   4   3  -2   15.08    0.84
  -4  -3   2   14.33    0.83
  -4  -3   2   15.99    1.06
   4  -3  -2   16.43    0.83
  -4  -3   2   14.29    1.04
   4  -3  -2   15.32    0.82
   4  -3  -2   16.18    1.03
  -4  -3   2   14.98    0.83
   5   3  -2    3.01    0.27
  -5   3   2    2.92    0.29
  -5   3   2    3.05    0.30
   5   3  -2    3.27    0.37
   5   3  -2    2.78    0.27
  -5  -3   2    2.67    0.24
  -5  -3   2    3.16    0.37
   5  -3  -2    3.31    0.26
  -5  -3   2    2.80    0.24
   5  -3  -2    3.62    0.32
  -5  -3   2    2.72    0.33
   5  -3  -2    2.91    0.25
   6   3  -2   -0.05    0.20
  -6   3   2    0.05    0.13
   6   3  -2   -0.04    0.11
  -6   3   2   -0.02    0.14
  -6   3   2    0.05    0.15
   6   3  -2   -0.03    0.13
  -6  -3   2    0.12    0.11
  -6  -3   2   -0.02    0.19
   6  -3  -2   -0.11    0.15
   6  -3  -2    0.04    0.12
   6  -3  -2   -0.03    0.12
   7   3  -2    1.34    0.29
  -7   3   2    0.89    0.21
  -7   3   2    0.64    0.18
  -7  -3   2    1.15    0.27
   7  -3  -2    0.91    0.20
   7  -3  -2    0.67    0.17
  -7   4  -2    1.41    0.22
  -7   4  -2    1.63    0.25
   7   4   2    1.67    0.33
   7  -4   2    1.28    0.21
   7  -4   2    1.05    0.20
  -7  -4  -2    1.65    0.32
  -6   4  -2   12.78    0.88
   6   4   2   12.38    0.74
   6   4   2   12.35    0.74
   6   4   2   11.72    0.94
  -6   4  -2   12.60    0.88
   6  -4   2   13.91    0.73
  -6  -4  -2   13.62    0.96
   6  -4   2   12.33    0.73
   6  -4   2   11.04    0.90
   5   4   2    3.78    0.43
   5   4   2    3.65    0.31
   5   4   2    3.60    0.30
  -5   4  -2    4.00    0.34
  -5   4  -2    3.97    0.35
  -5   4  -2    4.26    0.33
  -5  -4  -2    3.21    0.37
  -5  -4  -2    3.73    0.41
  -5  -4  -2    3.63    0.30
  -5  -4  -2    3.46    0.28
   5  -4   2    4.01    0.29
   5  -4   2    3.71    0.35
   5  -4   2    4.15    0.29
   4   4   2  144.78    7.28
  -4   4  -2  135.74    7.67
  -4   4  -2  148.61    9.02
  -4   4  -2  143.04    9.02
   4   4   2  129.36    9.05
   4   4   2  149.03    9.06
  -4  -4  -2  144.41    9.06
  -4  -4  -2  138.07    7.28
   4  -4   2  154.54    7.27
   4  -4   2  137.14    7.26
  -4  -4  -2  139.68    7.28
  -4  -4  -2  129.16    9.05
   4  -4   2  142.11    9.03
  -3   4  -2   52.62    3.37
  -3   4  -2   49.11    2.88
   3   4   2   56.19    3.40
   3   4   2   50.95    2.73
   3   4   2   47.50    3.39
  -3   4  -2   54.23    3.37
  -3  -4  -2   53.18    3.40
  -3  -4  -2   52.46    2.73
  -3  -4  -2   54.30    3.40
   3  -4   2   49.40    2.71
   3  -4   2   54.01    2.71
   3  -4   2   56.11    3.38
   2   4   2    0.05    0.05
   2   4   2   -0.02    0.07
   2   4   2    0.01    0.05
   2   4   2    0.10    0.09
  -2   4  -2    0.06    0.04
  -2   4  -2    0.10    0.07
  -2   4  -2    0.08    0.04
  -2  -4  -2    0.02    0.05
   2  -4   2    0.04    0.05
   2  -4   2    0.02    0.03
   2  -4   2    0.14    0.03
   2  -4   2    0.11    0.06
   2  -4   2    0.08    0.07
  -2  -4  -2    0.03    0.06
  -2  -4  -2    0.07    0.08
  -2  -4  -2    0.01    0.08
   1   4   2   18.18    0.87
   1   4   2   17.12    0.87
   1   4   2   15.47    1.08
  -1  -4  -2   18.19    0.87
  -1  -4  -2   16.13    1.08
  -1  -4  -2   17.54    0.87
   1  -4   2   17.28    1.07
  -1  -4  -2   13.99    1.08
   1  -4   2   15.36    1.07
   0   4  -2  159.18   10.13
   0   4   2  152.24   10.10
   0   4  -2  160.27   10.11
   0   4   2  156.83   10.09
   0  -4  -2  156.53    8.12
   0  -4  -2  151.26   10.09
   0  -4   2  159.49   10.11
   0  -4  -2  153.41   10.11
   0  -4   2  158.74    8.15
   0  -4   2  165.42    8.14
   0  -4   2  155.77   10.12
   0  -4  -2  165.00    8.12
   1   4  -2   22.39    1.29
   1   4  -2   18.89    1.03
   1   4  -2   18.96    1.03
   1  -4  -2   18.86    1.08
  -1  -4   2   21.75    1.29
  -1  -4   2   18.40    1.03
  -1  -4   2   19.95    1.29
  -1  -4   2   18.87    1.03
   2   4  -2  119.77    6.08
  -2   4   2  118.27    6.39
   2   4  -2  117.64    7.56
   2   4  -2  125.89    6.08
   2   4  -2  114.26    7.56
   2  -4  -2  115.27    7.54
  -2  -4   2  122.62    6.08
  -2  -4   2  116.60    7.56
  -2  -4   2  109.27    7.56
   2  -4  -2  118.24    7.55
   2  -4  -2  120.11    6.41
  -2  -4   2  120.75    6.08
   3   4  -2  118.10    8.22
  -3   4   2  128.65    8.20
  -3   4   2  130.49    8.20
  -3   4   2  126.77    6.95
   3   4  -2  127.02    6.61
   3   4  -2  130.88    8.23
  -3  -4   2  118.91    8.22
   3  -4  -2  125.85    6.61
   3  -4  -2  135.59    6.59
  -3  -4   2  132.99    8.23
   3  -4  -2  132.39    8.20
  -3  -4   2  133.46    6.62
  -4   4   2   17.80    1.04
  -4   4   2   18.56    1.19
   4   4  -2   17.73    0.99
  -4   4   2   18.86    1.20
   4   4  -2   20.48    1.25
   4   4  -2   16.68    1.23
   4   4  -2   17.00    0.99
   4  -4  -2   18.07    0.97
   4  -4  -2   19.76    1.21
   4  -4  -2   19.17    0.97
  -4  -4   2   17.75    1.23
  -4  -4   2   17.43    0.99
  -4  -4   2   18.63    1.24
  -4  -4   2   16.89    0.98
  -5   4   2   98.11    5.97
  -5   4   2   96.09    5.97
   5   4  -2   90.42    4.83
   5   4  -2   89.69    4.83
  -5   4   2   91.11    5.09
   5   4  -2   98.18    6.02
  -5  -4   2   98.97    6.02
  -5  -4   2   90.03    4.82
   5  -4  -2   94.05    4.81
  -5  -4   2   81.03    5.99
  -5  -4   2   88.07    4.82
   5  -4  -2  101.50    4.82
   5  -4  -2   92.62    5.98
  -6   4   2    5.13    0.43
  -6   4   2    5.10    0.42
   6   4  -2    4.96    0.39
  -6   4   2    5.64    0.44
   6   4  -2    5.08    0.39
   6   4  -2    5.17    0.55
   6  -4  -2    5.00    0.47
   6  -4  -2    5.94    0.39
  -6  -4   2    5.51    0.53
   6  -4  -2    5.59    0.38
  -7   4   2    8.60    0.63
   7   4  -2    8.18    0.74
  -7   4   2    7.39    0.61
   7  -4  -2    7.29    0.53
   7  -4  -2    8.31    0.55
  -7  -4   2    8.65    0.74
  -7   5  -2    8.64    0.67
  -7   5  -2    9.84    0.68
   7   5   2    9.23    0.81
  -7  -5  -2    9.45    0.82
   7  -5   2    8.35    0.59
   7  -5   2    9.71    0.60
   6   5   2    1.14    0.28
   6   5   2    0.80    0.16
  -6   5  -2    1.13    0.17
  -6   5  -2    1.36    0.18
   6  -5   2    1.15    0.17
  -6  -5  -2    1.33    0.28
   6  -5   2    1.16    0.17
   5   5   2   18.60    1.16
   5   5   2   13.44    1.12
  -5   5  -2   16.42    1.07
   5   5   2   14.91    0.90
  -5   5  -2   17.66    1.08
  -5   5  -2   15.19    0.97
   5  -5   2   17.17    1.10
  -5  -5  -2   16.42    1.13
  -5  -5  -2   14.41    0.89
   5  -5   2   17.67    0.89
  -5  -5  -2   17.55    1.15
   5  -5   2   15.18    0.88
  -5  -5  -2   15.13    0.90
  -4   5  -2    7.52    0.49
   4   5   2    6.38    0.55
  -4   5  -2    7.57    0.50
   4   5   2    7.24    0.45
  -4   5  -2    7.97    0.51
   4   5   2    7.68    0.59
   4  -5   2    7.03    0.52
  -4  -5  -2    6.08    0.44
   4  -5   2    7.59    0.42
   4  -5   2    8.10    0.42
  -4  -5  -2    7.50    0.58
  -4  -5  -2    6.43    0.55
  -4  -5  -2    7.44    0.44
  -3   5  -2   31.51    2.03
  -3   5  -2   32.40    2.03
   3   5   2   32.58    1.67
   3   5   2   29.61    2.07
   3   5   2   32.85    1.67
   3   5   2   30.30    2.07
  -3   5  -2   31.32    1.76
   3  -5   2   33.55    1.76
  -3  -5  -2   33.23    1.67
   3  -5   2   33.93    1.64
   3  -5   2   31.60    1.64
   3  -5   2   27.96    2.04
  -3  -5  -2   31.12    2.08
  -3  -5  -2   31.51    1.67
   2   5   2  655.51   41.23
   2   5   2  673.87   33.15
   2   5   2  643.91   33.16
   2   5   2  636.22   41.18
  -2  -5  -2  662.85   33.17
   2  -5   2  654.93   41.09
  -2  -5  -2  624.00   41.20
   2  -5   2  617.23   41.09
   2  -5   2  664.60   34.93
  -2  -5  -2  582.24   41.17
  -2  -5  -2  669.60   33.20
   1   5   2   18.29    1.35
   1   5   2   22.88    1.08
   1   5   2   21.62    1.08
   1  -5   2   20.46    1.33
  -1  -5  -2   22.35    1.08
  -1  -5  -2   17.15    1.34
  -1  -5  -2   23.57    1.09
  -1  -5  -2   20.25    1.35
   1  -5   2   19.07    1.33
   0   5  -2    1.63    0.14
   0   5   2    1.88    0.14
   0   5   2    1.58    0.13
   0   5  -2    1.77    0.15
   0  -5  -2    1.91    0.14
   0  -5  -2    1.41    0.10
   0  -5   2    1.21    0.11
   0  -5   2    1.79    0.15
   0  -5  -2    1.24    0.10
   0  -5   2    1.52    0.15
   0  -5  -2    1.61    0.14
   0  -5   2    1.60    0.11
   1   5  -2   14.16    0.84
   1   5  -2   12.32    0.67
   1   5  -2   12.28    0.67
  -1  -5   2   13.32    0.84
  -1  -5   2   11.67    0.67
  -1  -5   2   11.84    0.67
  -1  -5   2   12.97    0.84
   2   5  -2  104.68    6.54
   2   5  -2   96.17    5.26
   2   5  -2  104.38    5.26
   2   5  -2   97.81    6.54
   2  -5  -2  102.41    6.51
  -2  -5   2  106.33    5.26
   2  -5  -2   98.37    6.51
  -2  -5   2  105.50    6.54
  -2  -5   2   93.99    6.54
  -2  -5   2  105.06    5.26
   2  -5  -2  108.69    5.53
   3   5  -2  218.03   11.12
   3   5  -2  204.39   13.82
   3   5  -2  223.35   13.83
   3   5  -2  223.70   11.12
  -3   5   2  211.20   11.69
  -3  -5   2  201.21   13.82
  -3  -5   2  223.38   11.13
   3  -5  -2  216.19   11.13
   3  -5  -2  226.42   11.14
   3  -5  -2  214.65   13.80
  -3  -5   2  218.35   13.83
  -4   5   2   73.77    4.74
  -4   5   2   77.33    4.74
   4   5  -2   74.85    3.86
   4   5  -2   67.87    4.79
   4   5  -2   76.10    4.80
  -4   5   2   75.79    4.06
  -4  -5   2   62.42    4.78
  -4  -5   2   74.73    3.86
   4  -5  -2   81.86    3.83
   4  -5  -2   73.38    4.77
  -4  -5   2   76.45    3.86
  -4  -5   2   74.61    4.80
   4  -5  -2   76.18    3.83
   5   5  -2    0.06    0.09
   5   5  -2    0.06    0.10
  -5   5   2    0.37    0.09
  -5   5   2    0.31    0.10
   5   5  -2    0.21    0.16
  -5   5   2    0.08    0.13
   5   5  -2    0.13    0.18
   5  -5  -2    0.25    0.10
  -5  -5   2    0.19    0.11
   5  -5  -2    0.24    0.10
  -5  -5   2    0.21    0.11
  -5  -5   2    0.16    0.14
   5  -5  -2    0.32    0.13
  -5  -5   2    0.02    0.17
  -6   5   2    3.43    0.30
   6   5  -2    3.57    0.46
   6   5  -2    2.74    0.30
  -6   5   2    3.31    0.29
  -6   5   2    2.30    0.31
   6  -5  -2    3.16    0.29
  -6  -5   2    3.12    0.43
   6  -5  -2    3.50    0.29
  -7   5   2   17.19    1.22
  -7   5   2   18.86    1.23
   7   5  -2   19.15    1.35
  -7  -5   2   18.65    1.34
   7  -5  -2   18.43    1.03
   7  -5  -2   17.06    1.03
   7   6   2    0.79    0.30
  -7   6  -2    0.81    0.14
  -7   6  -2    0.96    0.15
  -7  -6  -2    0.73    0.28
   7  -6   2    0.72    0.17
   7  -6   2    0.95    0.19
  -6   6  -2    1.91    0.22
   6   6   2    2.33    0.35
  -6   6  -2    2.29    0.23
   6  -6   2    2.44    0.26
   6  -6   2    2.09    0.25
  -6  -6  -2    1.92    0.32
   5   6   2   30.27    1.70
   5   6   2   34.37    2.13
  -5   6  -2   32.21    1.81
   5   6   2   27.67    2.11
   5   6   2   32.29    1.70
   5  -6   2   36.04    1.68
  -5  -6  -2   35.64    2.14
   5  -6   2   33.20    1.68
   5  -6   2   30.48    2.08
  -5  -6  -2   29.90    1.69
  -5  -6  -2   31.52    1.70
  -5  -6  -2   27.67    2.11
   4   6   2   65.78    3.41
   4   6   2   68.25    4.25
  -4   6  -2   66.04    3.60
   4   6   2   58.60    4.23
   4   6   2   68.28    3.41
   4  -6   2   65.52    3.38
  -4  -6  -2   68.65    4.25
   4  -6   2   60.31    4.21
  -4  -6  -2   69.68    3.41
   4  -6   2   74.12    3.39
  -4  -6  -2   55.02    4.23
   3   6   2   77.32    3.99
   3   6   2   80.43    3.99
   3   6   2   75.83    4.96
   3   6   2   70.88    4.96
  -3  -6  -2   76.46    3.99
  -3  -6  -2   65.77    4.95
  -3  -6  -2   80.42    3.99
  -3  -6  -2   78.17    4.97
   3  -6   2   82.55    4.21
   3  -6   2   76.84    3.96
   3  -6   2   82.79    3.96
   2   6   2    0.44    0.11
   2   6   2    0.66    0.13
   2   6   2    0.69    0.09
   2   6   2    0.76    0.09
  -2  -6  -2    0.60    0.11
  -2  -6  -2    0.61    0.12
  -2  -6  -2    1.05    0.10
   2  -6   2    0.91    0.10
   2  -6   2    0.93    0.10
  -2  -6  -2    0.63    0.09
   2  -6   2    0.90    0.12
   1   6   2  138.08    8.76
   1   6   2  138.93    8.79
   1   6   2  135.67    7.08
   1   6   2  140.16    7.07
  -1  -6  -2  141.58    7.05
  -1  -6  -2  139.07    7.08
  -1  -6  -2  142.44    8.76
  -1  -6  -2  126.78    8.76
   1  -6   2  137.14    8.76
   1  -6   2  131.56    8.76
   0   6   2    1.94    0.14
   0   6  -2    1.75    0.15
   0   6  -2    1.89    0.16
   0   6   2    1.93    0.14
   0  -6   2    1.73    0.16
   0  -6  -2    1.92    0.15
   0  -6  -2    2.00    0.11
   0  -6   2    1.84    0.12
   0  -6   2    1.70    0.16
   0  -6  -2    1.96    0.11
   0  -6  -2    1.79    0.15
   0  -6   2    1.81    0.12
   1   6  -2  204.25   13.42
   1   6  -2  223.52   10.77
   1   6  -2  216.08   10.80
   1   6  -2  202.92   13.40
  -1  -6   2  216.81   10.82
  -1  -6   2  212.30   13.34
  -1  -6   2  183.65   13.35
  -1  -6   2  213.85   10.76
   2   6  -2   93.64    6.12
   2   6  -2  100.65    4.92
   2   6  -2   98.07    4.92
   2   6  -2   91.90    6.11
  -2  -6   2   94.00    6.12
   2  -6  -2  101.63    5.17
  -2  -6   2   98.79    4.92
  -2  -6   2   80.62    6.11
  -2  -6   2   99.21    4.92
   3   6  -2    8.32    0.64
   3   6  -2    9.18    0.51
   3   6  -2    9.46    0.65
   3   6  -2    8.96    0.51
  -3  -6   2    8.22    0.64
  -3  -6   2    9.21    0.65
   3  -6  -2    8.98    0.59
  -3  -6   2    8.59    0.51
  -3  -6   2    8.99    0.51
   4   6  -2   28.79    1.89
   4   6  -2   28.36    1.51
   4   6  -2   25.90    1.87
   4   6  -2   28.30    1.51
  -4   6   2   28.29    1.58
   4  -6  -2   29.90    1.48
   4  -6  -2   27.13    1.84
  -4  -6   2   28.85    1.89
  -4  -6   2   23.72    1.87
   4  -6  -2   31.62    1.48
  -4  -6   2   29.38    1.51
  -5   6   2    1.94    0.24
   5   6  -2    1.68    0.18
   5   6  -2    1.55    0.24
   5   6  -2    1.80    0.28
  -5  -6   2    2.17    0.29
  -5  -6   2    1.04    0.21
   5  -6  -2    2.16    0.20
  -5  -6   2    1.55    0.18
   5  -6  -2    1.97    0.19
  -5  -6   2    1.83    0.22
   5  -6  -2    1.49    0.20
   6   6  -2    4.62    0.55
  -6   6   2    4.71    0.42
   6  -6  -2    5.08    0.36
   6  -6  -2    5.04    0.36
  -6  -6   2    4.79    0.53
   7   6  -2    0.73    0.31
   7  -6  -2    0.93    0.18
  -7  -6   2    0.94    0.30
   7  -6  -2    0.61    0.17
   7   7   2    1.50    0.33
   7  -7   2    1.09    0.19
   7  -7   2    1.05    0.20
  -7  -7  -2    1.14    0.31
   6   7   2    4.13    0.54
   6  -7   2    4.77    0.35
   6  -7   2    4.70    0.35
  -6  -7  -2    4.61    0.54
   5   7   2    7.33    0.48
  -5   7  -2    7.34    0.52
   5   7   2    6.18    0.60
   5   7   2    8.24    0.65
   5   7   2    6.58    0.47
  -5  -7  -2    7.95    0.48
  -5  -7  -2    8.10    0.65
   5  -7   2    7.95    0.56
  -5  -7  -2    6.61    0.47
   5  -7   2    8.97    0.46
   5  -7   2    8.03    0.45
  -5  -7  -2    6.67    0.60
   4   7   2    2.88    0.34
   4   7   2    3.34    0.37
   4   7   2    2.94    0.26
   4   7   2    2.91    0.26
  -4  -7  -2    3.30    0.27
   4  -7   2    3.39    0.29
  -4  -7  -2    3.36    0.38
  -4  -7  -2    3.30    0.27
   4  -7   2    3.47    0.22
   4  -7   2    3.69    0.23
  -4  -7  -2    3.93    0.34
   3   7   2    8.65    0.72
   3   7   2   10.39    0.58
   3   7   2   10.10    0.58
   3   7   2    8.37    0.74
  -3  -7  -2   10.39    0.59
   3  -7   2   12.08    0.64
   3  -7   2   11.34    0.54
   3  -7   2   10.96    0.54
   3  -7   2   10.42    0.69
  -3  -7  -2    9.17    0.74
  -3  -7  -2   11.24    0.59
   2   7   2   14.99    0.82
   2   7   2   14.10    0.82
  -2  -7  -2   14.97    0.83
   2  -7   2   14.83    0.99
  -2  -7  -2   16.51    1.04
  -2  -7  -2   14.80    0.83
   2  -7   2   15.77    0.89
  -2  -7  -2   16.64    1.03
   1   7   2   22.54    1.48
   1   7   2   23.73    1.18
   1   7   2   22.38    1.48
  -1  -7  -2   19.30    1.48
  -1  -7  -2   24.08    1.19
  -1  -7  -2   24.48    1.19
  -1  -7  -2   23.24    1.49
   1  -7   2   21.24    1.46
   1  -7   2   23.57    1.46
   0   7   2   64.04    4.02
   0   7  -2   63.16    4.02
   0   7   2   66.87    4.01
   0   7  -2   65.84    4.02
   0  -7   2   60.56    4.03
   0  -7   2   63.37    4.03
   0  -7   2   62.19    3.24
   0  -7  -2   59.46    4.02
   0  -7   2   62.48    3.24
   0  -7  -2   60.08    3.23
   0  -7  -2   62.21    3.23
   0  -7  -2   64.25    4.02
   1   7  -2   18.81    1.31
   1   7  -2   21.25    1.05
   1   7  -2   20.68    1.05
   1   7  -2   17.32    1.31
  -1  -7   2   19.24    1.32
  -1  -7   2   20.80    1.06
  -1  -7   2   22.18    1.06
   2   7  -2   32.84    1.69
   2   7  -2   28.65    2.11
  -2  -7   2   34.56    1.70
  -2  -7   2   32.36    1.70
   2  -7  -2   35.77    1.79
  -2  -7   2   30.33    2.12
   3   7  -2    1.07    0.19
   3   7  -2    0.49    0.17
   3   7  -2    1.50    0.15
   3   7  -2    0.87    0.11
  -3  -7   2    0.98    0.19
  -3  -7   2    0.79    0.17
  -3  -7   2    1.69    0.18
   4   7  -2    0.09    0.17
   4   7  -2   -0.03    0.14
   4   7  -2    0.09    0.09
   4   7  -2    0.20    0.11
  -4  -7   2    0.09    0.10
  -4  -7   2    0.17    0.10
  -4  -7   2   -0.02    0.12
   4  -7  -2   -0.03    0.09
   4  -7  -2    0.06    0.06
   4  -7  -2    0.04    0.07
  -4  -7   2    0.05    0.16
   5   7  -2   -0.06    0.11
   5   7  -2    0.00    0.19
   5   7  -2   -0.04    0.15
  -5   7   2    0.03    0.11
   5   7  -2    0.02    0.10
  -5  -7   2   -0.03    0.10
   5  -7  -2    0.02    0.09
   5  -7  -2   -0.08    0.09
  -5  -7   2   -0.10    0.18
  -5  -7   2   -0.13    0.11
  -5  -7   2   -0.03    0.14
   5  -7  -2    0.13    0.11
  -6   7   2    0.07    0.15
   6   7  -2    0.01    0.24
   6  -7  -2    0.10    0.12
   6  -7  -2    0.11    0.12
  -6  -7   2   -0.02    0.22
   7   7  -2    2.13    0.37
   7  -7  -2    1.67    0.22
  -7  -7   2    2.21    0.37
   7  -7  -2    2.14    0.24
   7   8   2    6.76    0.69
   7  -8   2    5.82    0.44
  -7  -8  -2    5.71    0.65
   7  -8   2    5.46    0.43
   6   8   2   14.29    1.09
   6  -8   2   14.02    0.80
  -6  -8  -2   14.18    1.08
   5   8   2   29.88    1.66
   5   8   2   32.84    2.09
   5   8   2   27.27    1.66
   5  -8   2   34.00    1.63
  -5  -8  -2   32.83    2.09
   5  -8   2   31.23    1.63
   5  -8   2   30.09    2.02
  -5  -8  -2   28.99    1.66
   4   8   2   75.54    3.97
   4   8   2   70.36    3.97
   4   8   2   85.00    4.96
   4   8   2   69.61    4.94
   4  -8   2   78.01    4.19
   4  -8   2   83.06    3.94
   4  -8   2   74.15    3.94
  -4  -8  -2   72.97    3.98
  -4  -8  -2   79.52    4.96
  -4  -8  -2   75.96    3.98
   4  -8   2   76.87    4.90
   3   8   2    8.60    0.51
   3   8   2    8.42    0.50
   3   8   2    8.43    0.64
  -3  -8  -2    8.60    0.52
   3  -8   2    8.92    0.60
   3  -8   2    9.62    0.56
  -3  -8  -2    9.36    0.66
  -3  -8  -2    8.86    0.52
   2   8   2    0.87    0.15
   2   8   2    0.97    0.11
   2   8   2    0.98    0.11
   2   8   2    0.78    0.13
   2  -8   2    1.05    0.14
  -2  -8  -2    1.13    0.12
   2  -8   2    1.03    0.11
  -2  -8  -2    1.23    0.14
  -2  -8  -2    1.13    0.16
   1   8   2    6.72    0.38
   1   8   2    7.33    0.50
   1   8   2    6.65    0.38
   1   8   2    7.86    0.51
  -1  -8  -2    6.66    0.40
   1  -8   2    7.79    0.49
  -1  -8  -2    7.94    0.51
  -1  -8  -2    6.66    0.40
   1  -8   2    7.55    0.48
  -1  -8  -2    7.08    0.51
   0   8  -2   82.13    5.10
   0   8  -2   81.75    5.10
   0  -8   2   81.68    4.11
   0  -8  -2   81.75    5.10
   0  -8   2   80.09    5.11
   0  -8  -2   78.80    4.10
   0  -8  -2   82.07    4.10
   0  -8   2   75.61    5.10
   0  -8   2   78.34    4.10
   0  -8  -2   75.66    5.10
   1   8  -2   13.24    0.68
   1   8  -2   13.81    0.87
   1   8  -2   13.04    0.68
   1   8  -2   13.00    0.86
  -1  -8   2   13.55    0.70
   1  -8  -2   11.85    0.83
  -1  -8   2   11.44    0.86
  -1  -8   2   13.63    0.70
  -1  -8   2   12.94    0.87
   2   8  -2  113.40    6.76
   2   8  -2  103.98    5.43
   2   8  -2  102.37    5.43
   2  -8  -2  110.11    5.72
  -2  -8   2  107.39    6.76
  -2  -8   2  102.86    5.43
  -2  -8   2   96.72    6.75
  -2  -8   2  106.11    5.44
   3   8  -2   20.88    1.33
   3   8  -2   19.02    1.05
   3   8  -2   18.21    1.31
   3  -8  -2   18.88    1.26
  -3  -8   2   19.30    1.06
  -3  -8   2   19.56    1.05
  -3  -8   2   19.63    1.32
   3  -8  -2   20.40    1.10
   4   8  -2   -0.06    0.08
   4   8  -2   -0.10    0.17
   4   8  -2   -0.17    0.14
   4   8  -2    0.12    0.11
  -4  -8   2    0.06    0.11
   4  -8  -2    0.31    0.10
  -4  -8   2   -0.06    0.11
   4  -8  -2    0.03    0.06
  -4  -8   2   -0.01    0.17
   4  -8  -2    0.12    0.06
   5   8  -2    2.00    0.22
   5   8  -2    3.31    0.43
  -5  -8   2    2.47    0.32
   5  -8  -2    2.21    0.22
  -5  -8   2    2.29    0.24
   5  -8  -2    2.70    0.27
   5  -8  -2    2.14    0.21
   6   8  -2    0.36    0.25
  -6   8   2    0.22    0.15
   6  -8  -2    0.20    0.12
  -6  -8   2    0.10    0.23
   6  -8  -2    0.28    0.12
   7   8  -2    4.34    0.60
   7  -8  -2    3.99    0.37
  -7  -8   2    4.67    0.59
   7  -8  -2    4.32    0.37
   6   9   2    6.66    0.63
   6  -9   2    5.66    0.40
   6  -9   2    4.98    0.39
  -6  -9  -2    6.23    0.63
   5   9   2   16.78    1.08
   5   9   2   12.94    0.82
  -5  -9  -2   12.68    0.83
  -5  -9  -2   15.74    1.07
   5  -9   2   13.75    0.78
  -5  -9  -2   13.20    0.83
   5  -9   2   14.70    0.78
   4   9   2    0.15    0.19
   4   9   2    0.21    0.10
   4   9   2    0.27    0.11
   4   9   2    0.16    0.15
  -4  -9  -2    0.16    0.19
   4  -9   2    0.57    0.16
   4  -9   2    0.41    0.07
   4  -9   2    0.50    0.08
  -4  -9  -2    0.37    0.13
  -4  -9  -2    0.30    0.14
   4  -9   2    0.36    0.10
   3   9   2   12.41    0.68
   3   9   2   12.50    0.68
   3   9   2   11.77    0.88
  -3  -9  -2   13.10    0.70
  -3  -9  -2   11.81    0.88
   3  -9   2   13.80    0.76
   3  -9   2   11.09    0.81
  -3  -9  -2   12.41    0.70
   2   9   2   28.16    1.60
   2   9   2   32.22    2.01
  -2  -9  -2   30.63    1.62
   2  -9   2   30.52    1.97
  -2  -9  -2   32.96    2.02
  -2  -9  -2   29.98    1.62
   2  -9   2   30.38    1.72
   1   9   2   80.18    5.18
   1   9   2   78.48    5.18
   1  -9   2   81.16    5.17
  -1  -9  -2   79.91    4.17
  -1  -9  -2   82.10    5.19
  -1  -9  -2   83.30    4.17
   0   9  -2    0.81    0.11
   0   9  -2    0.55    0.08
   0  -9  -2    0.83    0.08
   0  -9   2    0.90    0.10
   0  -9   2    0.89    0.10
   0  -9   2    0.57    0.10
   0  -9  -2    0.63    0.10
   1   9  -2   54.29    3.48
   1   9  -2   52.36    3.47
  -1  -9   2   55.91    2.80
  -1  -9   2   54.80    3.48
   1  -9  -2   53.00    3.45
  -1  -9   2   53.78    2.80
   2   9  -2  217.89   13.57
   2   9  -2  205.10   10.91
   2   9  -2  204.66   10.91
   2   9  -2  206.52   13.57
   2  -9  -2  221.26   11.52
  -2  -9   2  214.93   13.58
  -2  -9   2  213.27   10.92
  -2  -9   2  215.98   10.92
   3   9  -2   42.20    2.57
   3   9  -2   37.56    2.05
   3   9  -2   36.98    2.56
  -3  -9   2   40.20    2.57
  -3  -9   2   36.78    2.06
  -3  -9   2   38.82    2.06
   3  -9  -2   41.22    2.16
   4   9  -2   14.97    0.93
   4   9  -2   19.39    1.20
   4   9  -2   17.01    0.94
   4   9  -2   14.43    1.16
  -4  -9   2   17.97    1.19
   4  -9  -2   17.09    0.88
  -4  -9   2   16.73    0.94
  -4  -9   2   16.27    0.94
   4  -9  -2   18.07    0.88
   5   9  -2    1.76    0.30
   5   9  -2    1.11    0.17
  -5  -9   2    1.06    0.17
   5  -9  -2    1.66    0.17
  -5  -9   2    1.50    0.27
   5  -9  -2    1.55    0.14
   6   9  -2   11.60    0.93
  -6  -9   2   11.36    0.92
   6  -9  -2   11.55    0.66
   6  -9  -2   10.80    0.65
   6  10   2    0.06    0.27
   6 -10   2    0.19    0.13
  -6 -10  -2   -0.09    0.25
   6 -10   2    0.24    0.13
   5  10   2   29.62    2.02
   5 -10   2   30.92    1.56
   5 -10   2   28.04    1.56
  -5 -10  -2   30.03    2.02
   4  10   2   22.13    1.70
   4  10   2   22.05    1.35
   4  10   2   28.06    1.73
  -4 -10  -2   24.41    1.37
   4 -10   2   24.84    1.32
  -4 -10  -2   25.65    1.37
  -4 -10  -2   25.73    1.72
   4 -10   2   27.57    1.32
   4 -10   2   27.24    1.46
   3  10   2   29.72    1.71
   3  10   2   32.31    2.15
  -3 -10  -2   31.90    1.72
  -3 -10  -2   32.64    2.15
   3 -10   2   34.18    1.83
  -3 -10  -2   34.06    1.73
   2  10   2   20.53    1.41
   2  10   2   22.63    1.42
  -2 -10  -2   21.34    1.43
  -2 -10  -2   21.97    1.14
  -2 -10  -2   20.46    1.14
   2 -10   2   22.26    1.23
   2 -10   2   20.29    1.38
   1  10   2   25.83    1.78
   1  10   2   25.49    1.78
  -1 -10  -2   30.10    1.44
  -1 -10  -2   27.56    1.44
   1 -10   2   28.44    1.41
   1 -10   2   26.83    1.77
  -1 -10  -2   27.58    1.80
   0  10  -2  135.48    8.90
   0  10  -2  129.43    8.91
   0 -10   2  143.03    7.17
   0 -10  -2  136.12    8.91
   0 -10  -2  141.57    7.17
   0 -10   2  145.58    7.17
   0 -10   2  136.24    8.92
   0 -10  -2  149.24    7.18
   1  10  -2  176.07   11.48
   1  10  -2  177.90   11.42
  -1 -10   2  179.00    9.20
   1 -10  -2  169.80   11.40
  -1 -10   2  193.38    9.20
  -1 -10   2  177.70   11.44
   2  10  -2    0.23    0.14
   2  10  -2    0.05    0.11
   2 -10  -2    0.12    0.10
  -2 -10   2    0.18    0.10
  -2 -10   2    0.20    0.13
  -2 -10   2    0.04    0.09
   3  10  -2   26.98    1.55
   3  10  -2   27.16    1.95
  -3 -10   2   31.07    1.57
  -3 -10   2   29.84    1.57
  -3 -10   2   28.89    1.96
   3 -10  -2   32.53    1.65
   4  10  -2   15.35    1.01
   4  10  -2   12.72    0.77
   4  10  -2   12.10    0.97
  -4 -10   2   13.72    0.79
  -4 -10   2   14.26    0.80
  -4 -10   2   15.13    1.01
   5  10  -2   15.84    1.13
  -5 -10   2   14.87    1.11
   5 -10  -2   14.63    0.81
   6  10  -2   24.07    1.69
  -6 -10   2   23.30    1.67
   6 -10  -2   22.90    1.27
   6 -10  -2   24.46    1.27
   6  11   2    9.67    0.86
   6 -11   2    9.88    0.58
  -6 -11  -2   10.02    0.85
   6 -11   2    9.00    0.57
   5  11   2    3.02    0.38
   5 -11   2    2.41    0.22
   5 -11   2    2.12    0.20
  -5 -11  -2    2.19    0.34
   4  11   2    0.10    0.20
   4 -11   2    0.20    0.06
   4 -11   2    0.14    0.06
  -4 -11  -2    0.09    0.14
   4 -11   2    0.08    0.15
  -4 -11  -2    0.00    0.18
  -4 -11  -2    0.05    0.13
   3  11   2   27.44    2.06
   3  11   2   31.68    2.08
  -3 -11  -2   30.96    1.67
   3 -11   2   34.82    1.78
  -3 -11  -2   31.31    2.09
  -3 -11  -2   32.15    1.67
   2  11   2    2.88    0.29
   2  11   2    2.75    0.32
   2 -11   2    3.90    0.31
  -2 -11  -2    3.01    0.32
  -2 -11  -2    3.34    0.26
  -2 -11  -2    3.52    0.26
   1  11   2   74.09    4.70
   1  11   2   72.08    4.70
   1 -11   2   74.29    3.77
  -1 -11  -2   70.74    4.71
  -1 -11  -2   79.99    3.79
   1 -11   2   71.85    4.69
   1 -11   2   71.31    3.77
  -1 -11  -2   72.09    3.79
   0 -11  -2    1.48    0.20
   0 -11   2    1.68    0.15
   0 -11  -2    2.19    0.15
   0 -11   2    1.82    0.20
   0 -11  -2    1.76    0.15
   0 -11   2    2.06    0.16
   1  11  -2    6.76    0.44
   1  11  -2    6.22    0.43
  -1 -11   2    5.90    0.45
   1 -11  -2    5.49    0.40
  -1 -11   2    4.91    0.35
  -1 -11   2    5.38    0.35
   2  11  -2   13.14    0.98
   2  11  -2   13.57    0.98
  -2 -11   2   14.53    0.80
  -2 -11   2   15.29    0.80
   2 -11  -2   15.88    0.85
  -2 -11   2   13.66    0.99
   3  11  -2   16.11    1.31
  -3 -11   2   20.49    1.06
   3 -11  -2   21.15    1.11
  -3 -11   2   19.34    1.06
  -3 -11   2   18.65    1.32
   4  11  -2    3.52    0.46
   4 -11  -2    4.73    0.34
  -4 -11   2    3.61    0.43
  -4 -11   2    3.59    0.33
  -4 -11   2    3.68    0.32
   5  11  -2    3.23    0.48
   5 -11  -2    3.30    0.23
   5 -11  -2    3.45    0.24
  -5 -11   2    3.18    0.47
   6  11  -2    5.49    0.63
   6 -11  -2    5.61    0.38
   6 -11  -2    5.33    0.37
  -6 -11   2    5.50    0.63
   6  12   2    5.92    0.64
   6 -12   2    4.84    0.37
   6 -12   2    5.31    0.38
   5  12   2    0.80    0.30
   5 -12   2    1.20    0.13
   5 -12   2    1.47    0.14
  -5 -12  -2    1.09    0.29
   4  12   2    2.05    0.30
  -4 -12  -2    1.63    0.28
   4 -12   2    1.81    0.24
  -4 -12  -2    1.36    0.22
   4 -12   2    1.87    0.14
  -4 -12  -2    1.01    0.18
   4 -12   2    1.60    0.13
   3  12   2    0.13    0.13
   3  12   2    0.07    0.17
  -3 -12  -2    0.06    0.12
   3 -12   2    0.00    0.15
  -3 -12  -2    0.07    0.16
  -3 -12  -2    0.05    0.12
   2  12   2    7.19    0.55
   2  12   2    6.86    0.53
  -2 -12  -2    7.41    0.44
  -2 -12  -2    7.22    0.56
   2 -12   2    7.23    0.49
  -2 -12  -2    6.69    0.44
   1  12   2    5.77    0.45
   1  12   2    6.24    0.44
   1 -12   2    5.88    0.44
   1 -12   2    6.32    0.35
  -1 -12  -2    6.17    0.38
  -1 -12  -2    6.11    0.48
   1 -12   2    6.17    0.34
  -1 -12  -2    6.65    0.38
   0 -12  -2   12.06    0.68
   0 -12  -2   13.95    0.86
   0 -12   2   11.66    0.69
   0 -12  -2   12.65    0.69
   0 -12   2   13.21    0.87
   1  12  -2    1.13    0.15
   1  12  -2    1.47    0.21
  -1 -12   2    1.63    0.18
   1 -12  -2    1.11    0.14
  -1 -12   2    1.43    0.19
   2  12  -2   13.46    0.93
   2  12  -2   15.34    0.95
   2 -12  -2   12.95    0.80
  -2 -12   2   12.35    0.75
  -2 -12   2   13.04    0.75
  -2 -12   2   13.44    0.95
   3  12  -2    0.45    0.19
   3  12  -2    0.31    0.15
  -3 -12   2    0.09    0.11
   3 -12  -2    0.33    0.13
  -3 -12   2    0.28    0.17
  -3 -12   2    0.41    0.14
   4  12  -2    6.15    0.61
  -4 -12   2    6.59    0.47
  -4 -12   2    6.75    0.46
   4 -12  -2    7.50    0.48
  -4 -12   2    6.30    0.59
  -5 -12   2    5.66    0.56
   5 -12  -2    4.41    0.29
   5 -12  -2    4.60    0.30
   6  12  -2    1.00    0.32
   6 -12  -2    1.06    0.15
  -6 -12   2    0.94    0.30
   6 -12  -2    1.06    0.15
   5  13   2    0.45    0.27
   5 -13   2    0.19    0.09
   5 -13   2    0.10    0.10
   5 -13   2    0.35    0.19
   4  13   2    1.41    0.29
  -4 -13  -2    1.56    0.28
   4 -13   2    1.43    0.24
  -4 -13  -2    1.30    0.20
   4 -13   2    1.66    0.13
  -4 -13  -2    1.33    0.21
   3  13   2   25.87    1.60
   3  13   2   21.96    1.57
  -3 -13  -2   22.97    1.28
   3 -13   2   24.27    1.37
  -3 -13  -2   23.68    1.60
  -3 -13  -2   22.08    1.28
   2  13   2   16.41    1.05
  -2 -13  -2   16.06    1.08
  -2 -13  -2   14.30    0.86
  -2 -13  -2   14.66    0.85
   2 -13   2   14.81    0.93
   1  13   2   18.76    1.25
   1  13   2   21.34    1.26
   1 -13   2   19.58    1.00
   1 -13   2   18.64    1.00
  -1 -13  -2   18.27    1.03
   1 -13   2   18.14    1.25
  -1 -13  -2   18.73    1.28
  -1 -13  -2   18.56    1.03
   0 -13  -2    0.82    0.15
   0 -13  -2    0.47    0.10
   0 -13  -2    0.51    0.10
   0 -13   2    0.55    0.10
   0 -13   2    0.76    0.15
   1  13  -2    0.47    0.11
   1  13  -2    0.53    0.13
  -1 -13   2    0.42    0.15
  -1 -13   2    0.30    0.11
  -1 -13   2    0.28    0.10
   2  13  -2   11.05    0.75
   2  13  -2    9.41    0.71
  -2 -13   2   10.00    0.74
  -2 -13   2    9.79    0.59
   2 -13  -2   10.26    0.63
  -2 -13   2    9.30    0.59
   3  13  -2    5.79    0.49
   3  13  -2    4.37    0.44
  -3 -13   2    4.94    0.38
   3 -13  -2    5.68    0.40
  -3 -13   2    5.05    0.39
  -3 -13   2    5.00    0.48
   4  13  -2   13.69    0.91
   4 -13  -2   11.00    0.72
  -4 -13   2   10.55    0.69
  -4 -13   2   11.61    0.89
  -4 -13   2   10.61    0.70
   5  13  -2   -0.12    0.25
   5 -13  -2    0.06    0.07
   5 -13  -2    0.01    0.08
   5  14   2   12.58    0.95
   5 -14   2   10.69    0.63
   5 -14   2   11.19    0.77
   5 -14   2   11.71    0.63
   4  14   2   28.49    1.81
  -4 -14  -2   24.23    1.44
   4 -14   2   25.99    1.53
   3  14   2   11.11    0.86
   3  14   2   13.21    0.89
   3 -14   2   11.73    0.77
  -3 -14  -2   11.72    0.72
  -3 -14  -2   11.83    0.71
   2  14   2   10.70    0.80
   2  14   2   10.83    0.78
   2 -14   2   12.10    0.73
  -2 -14  -2   11.41    0.66
  -2 -14  -2   11.89    0.66
  -2 -14  -2   10.37    0.82
   1  14   2   24.01    1.53
   1  14   2   23.48    1.53
  -1 -14  -2   23.21    1.26
   1 -14   2   24.35    1.24
  -1 -14  -2   23.49    1.26
  -1 -14  -2   22.76    1.57
   1 -14   2   23.08    1.23
   0 -14  -2   30.00    1.94
   0 -14   2   29.22    1.56
   0 -14   2   27.91    1.94
   0 -14  -2   31.13    1.55
   0 -14  -2   29.24    1.55
   1  14  -2   38.91    2.45
   1  14  -2   37.03    2.44
   1 -14  -2   38.76    1.95
   1 -14  -2   37.55    1.95
  -1 -14   2   36.93    1.99
  -1 -14   2   35.99    2.47
  -1 -14   2   38.74    1.99
   2  14  -2    2.66    0.31
   2  14  -2    2.83    0.34
  -2 -14   2    3.20    0.28
  -2 -14   2    3.19    0.29
  -2 -14   2    2.70    0.35
   2 -14  -2    3.54    0.31
   3  14  -2    0.66    0.22
   3  14  -2    0.54    0.18
   3 -14  -2    0.45    0.16
  -3 -14   2    0.53    0.17
  -3 -14   2    0.54    0.15
   4  14  -2   42.56    2.66
   4 -14  -2   36.98    2.22
   5  14  -2   12.10    0.93
   5 -14  -2   10.38    0.59
   4  15   2    3.57    0.47
   4 -15   2    3.17    0.40
   3  15   2   30.60    2.11
  -3 -15  -2   29.93    1.71
   3 -15   2   32.98    1.82
  -3 -15  -2   32.90    1.71
   2  15   2   12.02    0.93
   2  15   2   12.29    0.94
  -2 -15  -2   14.37    0.78
   2 -15   2   14.56    0.87
   2 -15   2   13.59    0.72
   2 -15   2   14.19    0.72
  -2 -15  -2   14.09    0.79
  -1 -15  -2   26.19    1.45
   1 -15   2   27.70    1.43
  -1 -15  -2   27.83    1.45
   1 -15   2   27.07    1.43
   0 -15  -2    1.15    0.18
   0 -15   2    1.13    0.14
   0 -15  -2    1.09    0.13
   0 -15   2    1.09    0.14
   0 -15  -2    1.00    0.13
   1  15  -2    0.99    0.13
   1  15  -2    1.04    0.15
   1 -15  -2    1.01    0.11
  -1 -15   2    1.11    0.16
  -1 -15   2    0.74    0.15
   1 -15  -2    1.17    0.11
   2  15  -2   10.76    0.83
   2  15  -2   11.87    0.85
   2 -15  -2   12.65    0.75
  -2 -15   2   12.74    0.71
  -2 -15   2   11.65    0.71
   3  15  -2   10.82    0.84
  -3 -15   2    9.75    0.67
  -3 -15   2   11.17    0.68
   3 -15  -2   11.48    0.70
   4  15  -2    0.77    0.26
   4 -15  -2    0.76    0.19
   4  16   2    1.55    0.30
   4 -16   2    1.91    0.28
   3  16   2    3.46    0.42
  -3 -16  -2    3.31    0.35
  -3 -16  -2    3.20    0.35
   3 -16   2    3.56    0.40
   2  16   2    0.65    0.17
   2  16   2    0.43    0.14
   2 -16   2    0.28    0.08
   2 -16   2    0.19    0.19
  -2 -16  -2    0.27    0.15
   2 -16   2    0.29    0.09
  -2 -16  -2    0.33    0.15
  -1 -16  -2    0.17    0.12
  -1 -16  -2    0.14    0.13
   1 -16   2    0.18    0.09
   0 -16  -2    2.45    0.24
   0 -16   2    2.84    0.25
   0 -16   2    2.76    0.25
   0 -16  -2    2.42    0.24
   1 -16  -2   26.02    1.42
   1 -16  -2   27.53    1.42
  -1 -16   2   26.45    1.45
  -1 -16   2   28.08    1.46
   2  16  -2    0.50    0.18
   2  16  -2    0.21    0.14
  -2 -16   2    0.51    0.16
  -2 -16   2    0.38    0.15
   2 -16  -2    0.44    0.18
  -3 -16   2    2.80    0.32
  -3 -16   2    2.76    0.33
   3 -16  -2    2.90    0.34
   4  16  -2    4.03    0.53
   4 -16  -2    4.26    0.40
   3  17   2    0.94    0.23
  -3 -17  -2    0.97    0.21
   3 -17   2    1.08    0.11
   3 -17   2    1.01    0.10
   3 -17   2    1.00    0.24
   2  17   2    1.35    0.17
   2 -17   2    0.88    0.12
  -2 -17  -2    1.02    0.19
   2 -17   2    0.74    0.23
  -2 -17  -2    0.68    0.18
   2 -17   2    0.90    0.12
  -1 -17  -2    7.68    0.51
   1 -17   2    7.79    0.47
  -1 -17  -2    8.22    0.51
   0 -17   2    0.13    0.11
   0 -17  -2   -0.08    0.11
   0 -17  -2   -0.05    0.11
   0 -17   2    0.11    0.12
   1 -17  -2    0.62    0.11
  -1 -17   2    0.47    0.15
  -1 -17   2    0.53    0.15
   1 -17  -2    0.40    0.10
   2  17  -2    4.10    0.38
   2  17  -2    4.84    0.43
   2 -17  -2    4.00    0.40
  -2 -17   2    3.94    0.38
  -2 -17   2    4.04    0.38
   2 -17  -2    4.56    0.26
  -3 -17   2    1.38    0.21
   3 -17  -2    1.29    0.23
   2 -18   2    0.02    0.09
  -2 -18  -2   -0.19    0.16
   2 -18   2    0.05    0.10
  -2 -18  -2   -0.10    0.15
   2 -18   2   -0.24    0.18
  -1 -18  -2   12.21    0.74
   1 -18   2   12.58    0.70
  -1 -18  -2   12.32    0.73
   1 -18   2   12.36    0.70
   0 -18   2    1.55    0.19
   0 -18   2    1.79    0.19
   0 -18  -2    1.43    0.19
   0 -18  -2    1.54    0.18
  -1 -18   2   19.11    1.12
  -1 -18   2   20.20    1.13
   1 -18  -2   21.01    1.09
   1 -18  -2   20.45    1.09
   2  18  -2    1.67    0.23
   2  18  -2    1.75    0.22
  -2 -18   2    1.68    0.23
  -2 -18   2    1.70    0.23
   2 -18  -2    1.54    0.16
   2 -18  -2    1.61    0.25
   2 -18  -2    1.67    0.17
   7   0   3    0.04    0.14
  -7   0  -3   -0.04    0.20
   6   0   3    0.19    0.14
   6   0   3    0.14    0.19
   6   0   3    0.33    0.13
  -6   0  -3    0.23    0.19
  -6   0  -3    0.09    0.14
  -5   0  -3    0.09    0.08
  -5   0  -3   -0.11    0.12
  -5   0  -3   -0.05    0.10
   5   0   3    0.06    0.15
  -5   0  -3    0.09    0.15
   5   0   3    0.02    0.09
   5   0   3    0.02    0.11
  -4   0  -3    0.45    0.08
   4   0   3    0.28    0.09
  -4   0  -3    0.40    0.14
  -4   0  -3    0.54    0.09
   4   0   3    0.44    0.10
   4   0   3    0.39    0.13
   3   0   3    0.11    0.09
   3   0   3    0.05    0.08
   3   0   3    0.11    0.06
  -3   0  -3    0.05    0.05
  -3   0  -3    0.07    0.05
  -3   0  -3    0.03    0.08
   3   0   3    0.29    0.06
  -3   0  -3    0.03    0.05
  -2   0  -3   -0.14    0.07
   2   0   3    0.01    0.06
  -2   0  -3    0.06    0.06
   2   0   3   -0.10    0.07
   2   0   3    0.01    0.08
   2   0   3   -0.13    0.05
  -2   0  -3   -0.08    0.05
  -2   0  -3   -0.04    0.08
   1   0   3    0.11    0.05
  -1   0  -3    0.09    0.05
   1   0   3    0.14    0.05
  -1   0  -3    0.16    0.06
  -1   0  -3    0.22    0.04
   1   0   3    0.09    0.03
  -1   0  -3    0.11    0.05
  -1   0  -3    0.12    0.04
   0   0   3    0.24    0.03
   0   0  -3    0.32    0.04
   0   0  -3    0.18    0.04
   0   0   3    0.20    0.03
   0   0  -3    0.26    0.04
   0   0   3    0.28    0.04
  -1   0   3    0.14    0.04
  -1   0   3    0.27    0.04
   1   0  -3    0.24    0.05
   1   0  -3    0.32    0.06
   1   0  -3    0.13    0.04
  -1   0   3    0.04    0.04
   2   0  -3    0.05    0.07
   2   0  -3    0.08    0.05
   2   0  -3   -0.02    0.06
  -2   0   3    0.07    0.04
  -2   0   3   -0.01    0.04
   2   0  -3   -0.01    0.04
  -2   0   3   -0.02    0.06
  -3   0   3    0.06    0.05
   3   0  -3   -0.02    0.06
   3   0  -3   -0.01    0.07
  -3   0   3    0.03    0.04
  -3   0   3   -0.01    0.09
   3   0  -3    0.03    0.06
   3   0  -3    0.01    0.08
  -3   0   3    0.00    0.02
  -4   0   3    0.12    0.06
   4   0  -3    0.13    0.08
   4   0  -3    0.11    0.11
   4   0  -3    0.02    0.08
  -4   0   3    0.07    0.05
  -4   0   3    0.06    0.08
  -4   0   3    0.02    0.12
   5   0  -3    0.22    0.12
   5   0  -3    0.23    0.16
  -5   0   3    0.22    0.11
  -5   0   3    0.16    0.17
   5   0  -3    0.14    0.12
  -6   0   3   -0.34    0.13
   6   0  -3   -0.16    0.12
   6   0  -3   -0.22    0.18
  -6   0   3   -0.27    0.18
   6   0  -3   -0.29    0.13
   7   0  -3   -0.08    0.15
  -7   0   3   -0.08    0.20
  -7   1  -3    2.84    0.41
  -7  -1  -3    2.47    0.35
   7  -1   3    2.29    0.26
   7  -1   3    2.71    0.29
  -6   1  -3   26.82    1.64
   6   1   3   25.38    1.65
   6   1   3   22.49    1.31
  -6   1  -3   21.51    1.61
   6   1   3   22.94    1.31
   6  -1   3   22.74    1.31
  -6  -1  -3   25.86    1.65
   6  -1   3   25.17    1.64
   6  -1   3   23.30    1.31
  -5   1  -3   23.53    1.46
   5   1   3   27.42    1.72
   5   1   3   25.59    1.38
  -5   1  -3   24.45    1.70
   5   1   3   25.48    1.38
  -5   1  -3   28.24    1.71
  -5  -1  -3   26.64    1.72
   5  -1   3   26.15    1.71
  -5  -1  -3   23.58    1.36
   5  -1   3   24.31    1.37
   5  -1   3   26.02    1.37
  -4   1  -3    1.96    0.21
   4   1   3    1.75    0.18
   4   1   3    1.72    0.18
  -4   1  -3    1.89    0.21
   4   1   3    1.35    0.19
  -4   1  -3    1.85    0.23
  -4   1  -3    1.60    0.14
   4   1   3    1.22    0.19
  -4   1  -3    1.83    0.14
  -4  -1  -3    1.64    0.16
   4  -1   3    1.93    0.18
  -4  -1  -3    1.43    0.21
   4  -1   3    1.90    0.18
  -4  -1  -3    1.81    0.17
   4  -1   3    1.55    0.22
  -4  -1  -3    1.42    0.20
   3   1   3   64.74    4.20
   3   1   3   61.46    4.20
  -3   1  -3   67.76    3.37
   3   1   3   64.89    3.38
  -3   1  -3   68.19    4.20
   3   1   3   67.07    3.38
  -3   1  -3   66.16    3.57
  -3   1  -3   64.43    3.37
  -3  -1  -3   61.55    4.20
   3  -1   3   64.84    4.20
   3  -1   3   61.83    4.20
   3  -1   3   68.91    3.38
   3  -1   3   65.84    3.38
  -3  -1  -3   65.99    4.20
  -3  -1  -3   64.45    3.38
  -3  -1  -3   67.49    3.38
   2   1   3   40.59    2.68
  -2   1  -3   41.47    2.67
   2   1   3   43.26    2.15
   2   1   3   38.36    2.67
  -2   1  -3   42.31    2.14
  -2   1  -3   41.93    2.27
   2   1   3   42.68    2.15
  -2   1  -3   41.60    2.15
   2  -1   3   38.82    2.67
   2  -1   3   40.89    2.67
  -2  -1  -3   40.67    2.68
   2  -1   3   42.33    2.15
  -2  -1  -3   41.87    2.15
  -2  -1  -3   44.93    2.15
   2  -1   3   41.20    2.15
  -1   1  -3  260.40   13.44
  -1   1  -3  272.74   16.73
  -1   1  -3  241.28   14.14
   1   1   3  260.35   16.73
   1   1   3  261.20   16.72
  -1   1  -3  269.17   13.44
   1   1   3  258.41   13.44
   1  -1   3  260.07   13.45
   1  -1   3  246.38   14.15
   1  -1   3  262.78   16.72
  -1  -1  -3  276.92   13.48
   1  -1   3  257.39   16.71
  -1  -1  -3  256.02   16.71
   1  -1   3  273.60   13.44
  -1  -1  -3  256.68   16.71
   0   1  -3   34.60    2.27
   0   1  -3   35.52    1.82
   0   1  -3   33.55    2.27
   0   1   3   36.60    1.82
   0   1   3   35.57    1.82
   0   1   3   35.71    2.27
   0  -1  -3   34.29    2.26
   0  -1  -3   37.70    1.82
   0  -1   3   36.50    1.82
   0  -1  -3   33.46    2.26
   0  -1  -3   35.60    1.82
   0  -1   3   35.33    1.82
   0  -1   3   35.24    2.27
   0  -1  -3   37.09    1.92
   0  -1   3   33.45    2.27
   1   1  -3  158.56    8.05
   1   1  -3  156.30    9.99
   1   1  -3  151.99    9.94
  -1   1   3  154.90    8.02
  -1   1   3  152.22   10.00
  -1   1   3  155.45    8.03
  -1  -1   3  156.43   10.02
   1  -1  -3  156.50    8.04
   1  -1  -3  159.30    8.02
   1  -1  -3  153.85    9.99
  -1  -1   3  152.75    9.99
   1  -1  -3  159.24    9.98
   2   1  -3   76.72    5.04
  -2   1   3   78.33    4.04
   2   1  -3   78.62    4.05
   2   1  -3   78.69    5.04
  -2   1   3   81.54    5.03
  -2   1   3   80.04    5.03
  -2   1   3   78.72    4.05
   2   1  -3   77.46    4.05
   2  -1  -3   79.99    4.05
  -2  -1   3   79.43    4.05
   2  -1  -3   82.70    5.03
  -2  -1   3   77.15    4.05
   2  -1  -3   77.90    4.05
  -2  -1   3   75.43    5.03
  -2  -1   3   78.95    5.04
   2  -1  -3   76.74    5.03
   3   1  -3    0.62    0.12
   3   1  -3    0.40    0.08
   3   1  -3    0.32    0.07
   3   1  -3    0.36    0.10
  -3   1   3    0.42    0.06
  -3   1   3    0.54    0.09
  -3   1   3    0.48    0.10
  -3   1   3    0.42    0.06
  -3  -1   3    0.43    0.11
  -3  -1   3    0.43    0.07
   3  -1  -3    0.26    0.07
   3  -1  -3    0.33    0.10
  -3  -1   3    0.44    0.07
  -3  -1   3    0.51    0.10
   3  -1  -3    0.35    0.09
  -4   1   3   60.84    3.17
   4   1  -3   54.39    3.96
   4   1  -3   63.37    3.19
   4   1  -3   60.12    3.97
  -4   1   3   64.94    3.96
  -4   1   3   55.24    3.95
  -4   1   3   62.27    3.17
   4   1  -3   62.02    3.19
   4  -1  -3   64.05    3.18
   4  -1  -3   59.31    3.96
  -4  -1   3   62.98    3.97
  -4  -1   3   61.57    3.18
  -4  -1   3   64.27    3.18
   4  -1  -3   63.72    3.18
   5   1  -3   14.80    0.78
   5   1  -3   14.31    0.78
  -5   1   3   13.91    0.95
   5   1  -3   13.00    0.97
  -5   1   3   12.38    0.94
   5  -1  -3   12.68    0.96
   5  -1  -3   13.73    0.77
  -5  -1   3   14.45    0.97
  -5  -1   3   13.03    0.75
   5  -1  -3   14.62    0.77
   6   1  -3    0.48    0.15
  -6   1   3    0.51    0.20
   6   1  -3    0.35    0.15
  -6   1   3    0.69    0.17
   6   1  -3    0.52    0.23
  -6  -1   3    0.38    0.18
   6  -1  -3    0.32    0.13
   6  -1  -3    0.51    0.21
   6  -1  -3    0.34    0.14
  -6  -1   3    0.18    0.22
  -7   1   3    0.47    0.21
   7   1  -3    0.28    0.17
   7  -1  -3    0.04    0.16
   7  -1  -3    0.34    0.17
  -7  -1   3    0.39    0.23
  -7   2  -3    0.39    0.20
   7  -2   3    0.23    0.16
   7  -2   3    0.31    0.15
  -7  -2  -3    0.28    0.23
   6   2   3    1.74    0.28
   6   2   3    1.31    0.19
   6   2   3    1.23    0.19
  -6   2  -3    1.64    0.24
  -6   2  -3    1.46    0.22
   6  -2   3    1.36    0.19
  -6  -2  -3    1.57    0.27
   6  -2   3    1.51    0.19
   6  -2   3    2.10    0.27
   5   2   3   97.55    6.03
   5   2   3   94.42    4.84
  -5   2  -3   91.30    6.00
  -5   2  -3  104.14    6.01
   5   2   3   93.61    4.84
  -5   2  -3   90.86    5.11
   5  -2   3  100.21    4.84
   5  -2   3   91.63    4.84
  -5  -2  -3   98.49    6.02
  -5  -2  -3   86.83    4.83
   5  -2   3   92.36    6.01
  -5  -2  -3   89.58    4.83
  -5  -2  -3   82.77    6.01
  -4   2  -3    8.56    0.56
   4   2   3    8.89    0.52
  -4   2  -3    9.13    0.64
  -4   2  -3    9.67    0.64
   4   2   3    9.74    0.67
  -4   2  -3    8.76    0.49
   4   2   3    7.89    0.65
   4   2   3    9.30    0.53
   4  -2   3    8.43    0.51
  -4  -2  -3    9.51    0.67
  -4  -2  -3    9.21    0.65
   4  -2   3   10.13    0.65
  -4  -2  -3    8.34    0.51
   4  -2   3    9.42    0.52
  -4  -2  -3    8.82    0.52
   3   2   3  155.15    8.02
  -3   2  -3  153.88    8.03
  -3   2  -3  154.92    8.02
   3   2   3  148.30    9.96
  -3   2  -3  158.77    9.96
   3   2   3  156.95    9.97
   3   2   3  156.43    8.02
  -3   2  -3  162.65    9.96
  -3   2  -3  150.54    8.44
   3  -2   3  160.22    9.96
  -3  -2  -3  157.33    8.02
  -3  -2  -3  155.76    9.97
   3  -2   3  161.29    8.01
   3  -2   3  142.56    9.95
  -3  -2  -3  162.95    8.02
  -3  -2  -3  153.67    9.97
   3  -2   3  158.81    8.01
  -2   2  -3   20.03    1.11
   2   2   3   18.88    1.31
   2   2   3   21.38    1.05
  -2   2  -3   20.02    1.30
  -2   2  -3   20.72    1.04
   2   2   3   19.05    1.31
  -2   2  -3   20.47    1.04
  -2   2  -3   19.53    1.30
  -2  -2  -3   21.26    1.05
   2  -2   3   18.69    1.30
  -2  -2  -3   19.90    1.31
   2  -2   3   20.40    1.04
   2  -2   3   20.55    1.05
  -2  -2  -3   17.97    1.31
   2  -2   3   20.44    1.30
   2  -2   3   20.02    1.11
  -1   2  -3    9.65    0.51
   1   2   3    9.29    0.52
  -1   2  -3    8.19    0.55
  -1   2  -3    9.88    0.65
   1   2   3   10.16    0.66
  -1   2  -3    9.79    0.65
   1   2   3    9.57    0.65
  -1   2  -3    9.31    0.51
   1   2   3    9.07    0.52
  -1  -2  -3    9.41    0.65
  -1  -2  -3    8.91    0.52
   1  -2   3    9.77    0.65
  -1  -2  -3    9.55    0.65
   1  -2   3    9.63    0.52
   1  -2   3    9.86    0.52
  -1  -2  -3    9.81    0.53
   1  -2   3    9.12    0.65
   1  -2   3    8.43    0.56
   0   2  -3  354.39   18.03
   0   2   3  360.57   18.02
   0   2  -3  348.68   22.43
   0   2  -3  342.39   18.04
   0   2   3  344.36   18.02
   0   2   3  354.39   22.41
   0  -2   3  348.21   22.42
   0  -2  -3  352.41   18.03
   0  -2  -3  356.45   22.41
   0  -2   3  339.47   22.42
   0  -2  -3  349.96   22.42
   0  -2   3  343.39   18.04
   0  -2   3  362.78   18.04
   1   2  -3  509.76   32.91
   1   2  -3  520.26   32.93
   1  -2  -3  508.02   32.87
  -1  -2   3  524.29   32.94
  -1  -2   3  522.31   26.49
  -1  -2   3  497.50   32.91
   1  -2  -3  519.84   32.86
  -2   2   3   14.16    0.92
   2   2  -3   14.41    0.94
   2   2  -3   14.66    0.75
   2   2  -3   13.91    0.75
   2   2  -3   13.51    0.93
  -2   2   3   13.91    0.92
  -2  -2   3   13.16    0.75
   2  -2  -3   14.26    0.92
  -2  -2   3   14.33    0.94
   2  -2  -3   13.97    0.74
  -2  -2   3   14.49    0.75
  -2  -2   3   14.64    0.93
   2  -2  -3   14.18    0.74
   2  -2  -3   13.30    0.92
  -3   2   3    4.55    0.33
  -3   2   3    4.42    0.24
  -3   2   3    4.22    0.33
   3   2  -3    4.33    0.28
   3   2  -3    4.25    0.36
   3   2  -3    4.43    0.28
   3   2  -3    4.01    0.35
  -3   2   3    4.60    0.24
   3  -2  -3    4.68    0.27
  -3  -2   3    4.50    0.36
  -3  -2   3    4.90    0.28
   3  -2  -3    4.26    0.34
   3  -2  -3    4.76    0.27
   3  -2  -3    4.08    0.33
  -3  -2   3    4.55    0.27
  -3  -2   3    3.98    0.35
   4   2  -3  107.50    7.80
   4   2  -3  122.17    6.28
  -4   2   3  127.35    7.79
   4   2  -3  121.95    6.28
   4   2  -3  126.60    7.81
  -4   2   3  133.44    7.79
  -4  -2   3  119.07    6.27
   4  -2  -3  125.44    6.27
  -4  -2   3  115.44    7.80
   4  -2  -3  118.40    6.27
  -4  -2   3  116.94    6.27
  -4  -2   3  127.01    7.81
   4  -2  -3  120.53    7.79
   5   2  -3   39.40    2.06
   5   2  -3   40.25    2.57
  -5   2   3   39.04    2.53
  -5   2   3   42.73    2.54
   5   2  -3   38.24    2.06
  -5  -2   3   38.62    2.06
   5  -2  -3   38.91    2.55
  -5  -2   3   41.57    2.57
   5  -2  -3   40.17    2.05
  -5  -2   3   34.35    2.54
  -5  -2   3   35.41    2.04
   5  -2  -3   38.20    2.05
   6   2  -3   36.85    2.00
  -6   2   3   40.49    2.48
  -6   2   3   35.51    2.46
   6   2  -3   35.16    2.00
  -6   2   3   34.67    2.12
   6   2  -3   38.91    2.51
   6  -2  -3   36.49    1.99
  -6  -2   3   40.83    2.50
   6  -2  -3   39.56    2.00
   6  -2  -3   37.29    2.49
  -7   2   3    0.27    0.20
   7  -2  -3    0.13    0.16
   7  -2  -3    0.16    0.16
  -7  -2   3    0.13    0.23
   7   3   3   10.71    0.89
  -7   3  -3   10.61    0.82
  -7  -3  -3   12.28    0.89
   7  -3   3   10.12    0.68
   7  -3   3   10.56    0.68
  -6   3  -3   35.69    2.19
   6   3   3   33.38    2.23
   6   3   3   31.95    1.77
  -6   3  -3   31.08    2.18
   6   3   3   32.18    1.78
   6  -3   3   34.57    1.77
  -6  -3  -3   36.12    2.23
   6  -3   3   31.86    1.76
   6  -3   3   30.78    2.19
  -5   3  -3    2.36    0.30
  -5   3  -3    2.85    0.29
  -5   3  -3    3.00    0.32
   5   3   3    3.36    0.38
   5   3   3    2.48    0.26
   5   3   3    2.73    0.27
  -5  -3  -3    3.05    0.37
  -5  -3  -3    2.92    0.32
   5  -3   3    2.71    0.25
   5  -3   3    3.52    0.32
   5  -3   3    3.05    0.26
  -5  -3  -3    2.30    0.24
  -5  -3  -3    2.62    0.24
   4   3   3    2.42    0.22
  -4   3  -3    2.45    0.24
   4   3   3    2.64    0.30
  -4   3  -3    2.70    0.24
   4   3   3    1.99    0.26
  -4   3  -3    2.60    0.25
   4   3   3    2.56    0.22
   4  -3   3    2.49    0.24
  -4  -3  -3    2.44    0.29
  -4  -3  -3    2.46    0.27
   4  -3   3    2.33    0.20
   4  -3   3    2.52    0.20
  -4  -3  -3    2.39    0.21
  -4  -3  -3    2.40    0.21
   3   3   3   75.99    5.01
  -3   3  -3   77.71    4.24
   3   3   3   82.19    4.03
   3   3   3   74.53    5.01
  -3   3  -3   79.21    4.99
  -3   3  -3   79.47    4.99
  -3  -3  -3   72.79    5.00
  -3  -3  -3   75.88    4.03
   3  -3   3   81.83    4.02
   3  -3   3   73.35    4.99
   3  -3   3   80.43    4.02
   3  -3   3   77.93    5.00
  -3  -3  -3   78.81    5.01
  -3  -3  -3   80.33    4.03
  -2   3  -3  177.27   11.22
   2   3   3  185.37    9.06
   2   3   3  174.35   11.16
   2   3   3  170.98   11.16
  -2   3  -3  171.31   11.19
  -2   3  -3  177.13    9.50
  -2  -3  -3  181.28   11.23
   2  -3   3  167.57   11.18
  -2  -3  -3  153.09    8.97
  -2  -3  -3  165.36   11.16
   2  -3   3  170.54   11.21
  -2  -3  -3  182.21    9.03
   2  -3   3  177.69    9.02
   2  -3   3  186.12    9.02
   2  -3   3  182.15    9.48
   1   3   3  142.95    9.28
   1   3   3  151.01    7.47
  -1   3  -3  145.40    9.31
  -1   3  -3  146.14    9.30
   1   3   3  146.15    7.49
   1  -3   3  145.00    7.90
   1  -3   3  151.93    7.49
  -1  -3  -3  145.00    7.51
  -1  -3  -3  146.01    7.49
  -1  -3  -3  130.26    9.26
   1  -3   3  148.25    9.29
   1  -3   3  140.50    9.30
   1  -3   3  149.44    7.48
  -1  -3  -3  144.23    9.32
   0   3   3   48.26    3.45
   0   3  -3   50.55    3.46
   0   3   3   53.54    2.79
   0   3  -3   56.79    2.78
   0   3  -3   54.90    2.80
   0   3   3   57.08    2.78
   0   3   3   48.64    3.45
   0  -3  -3   53.44    3.46
   0  -3   3   54.17    2.78
   0  -3  -3   53.92    3.46
   0  -3   3   51.21    3.46
   0  -3  -3   56.84    2.78
   0  -3   3   49.67    3.46
   0  -3  -3   59.00    2.78
   0  -3   3   58.89    2.78
   1   3  -3  981.67   63.38
  -1  -3   3 1000.00   51.01
  -1  -3   3  998.35   63.39
  -2   3   3   89.69    5.79
   2   3  -3   86.23    5.78
   2   3  -3   94.89    4.65
  -2   3   3   93.48    4.89
  -2   3   3   86.49    5.77
   2   3  -3   89.80    5.79
   2  -3  -3   86.26    5.77
   2  -3  -3   87.89    5.77
  -2  -3   3   90.22    5.79
   2  -3  -3   97.17    4.65
  -2  -3   3   80.66    5.78
  -2  -3   3   96.88    4.66
   2  -3  -3   94.62    4.65
  -3   3   3  127.92    8.31
  -3   3   3  137.91    7.04
   3   3  -3  116.34    8.31
   3   3  -3  131.11    8.32
   3   3  -3  136.04    6.69
  -3   3   3  129.84    8.33
   3   3  -3  138.03    6.69
   3  -3  -3  120.92    8.30
  -3  -3   3  119.10    8.31
  -3  -3   3  130.47    6.69
   3  -3  -3  125.92    8.30
  -3  -3   3  133.33    6.69
  -3  -3   3  135.74    8.32
   3  -3  -3  131.43    6.68
   3  -3  -3  135.10    6.69
   4   3  -3   50.81    2.60
   4   3  -3   52.20    2.60
  -4   3   3   50.77    3.21
   4   3  -3   44.79    3.23
  -4   3   3   52.88    2.74
   4   3  -3   48.70    3.23
  -4   3   3   48.11    3.20
   4  -3  -3   50.30    2.58
  -4  -3   3   43.50    3.22
  -4  -3   3   48.18    2.59
   4  -3  -3   47.22    3.21
   4  -3  -3   54.05    2.58
  -4  -3   3   52.90    3.24
  -4  -3   3   51.87    2.59
  -5   3   3    2.50    0.28
   5   3  -3    2.38    0.25
  -5   3   3    2.53    0.26
   5   3  -3    2.32    0.29
   5   3  -3    2.32    0.25
  -5   3   3    2.01    0.25
  -5  -3   3    2.00    0.28
   5  -3  -3    2.59    0.24
   5  -3  -3    2.17    0.26
   5  -3  -3    2.78    0.23
  -5  -3   3    2.29    0.23
  -5  -3   3    2.28    0.22
   6   3  -3    8.76    0.58
  -6   3   3    9.14    0.63
  -6   3   3    9.94    0.70
   6   3  -3    9.09    0.59
   6   3  -3    9.44    0.76
   6  -3  -3    9.74    0.58
  -6  -3   3    7.99    0.56
  -6  -3   3   10.41    0.77
   6  -3  -3   10.27    0.58
   6  -3  -3    9.89    0.72
  -7   3   3    6.02    0.55
   7   3  -3    8.11    0.69
  -7   3   3    7.14    0.58
   7  -3  -3    6.24    0.49
  -7  -3   3    8.13    0.69
   7  -3  -3    6.92    0.50
   7   4   3    0.26    0.26
  -7   4  -3    0.07    0.15
  -7   4  -3    0.04    0.17
   7  -4   3    0.04    0.16
  -7  -4  -3    0.17    0.25
   7  -4   3   -0.03    0.16
   6   4   3    0.02    0.22
   6   4   3    0.08    0.13
  -6   4  -3    0.08    0.14
  -6   4  -3    0.02    0.13
   6   4   3    0.14    0.12
   6  -4   3    0.09    0.16
   6  -4   3    0.16    0.13
  -6  -4  -3    0.42    0.22
   6  -4   3    0.17    0.13
   5   4   3    4.35    0.48
  -5   4  -3    5.18    0.40
  -5   4  -3    5.37    0.40
   5   4   3    4.63    0.36
  -5   4  -3    5.05    0.41
   5   4   3    5.16    0.36
   5  -4   3    4.61    0.42
  -5  -4  -3    5.20    0.49
  -5  -4  -3    5.09    0.35
  -5  -4  -3    3.84    0.43
  -5  -4  -3    4.84    0.34
   5  -4   3    6.22    0.35
   5  -4   3    5.46    0.34
   4   4   3   60.40    3.16
  -4   4  -3   61.12    3.91
   4   4   3   56.28    3.93
   4   4   3   63.18    3.94
  -4   4  -3   62.56    3.91
  -4   4  -3   60.52    3.34
  -4  -4  -3   63.91    3.94
  -4  -4  -3   61.48    3.16
  -4  -4  -3   56.45    3.93
   4  -4   3   61.01    3.92
   4  -4   3   64.76    3.15
   4  -4   3   59.61    3.15
  -4  -4  -3   58.46    3.16
   3   4   3   42.56    2.06
   3   4   3   37.00    2.56
   3   4   3   37.63    2.55
  -3   4  -3   40.47    2.53
  -3   4  -3   40.80    2.17
  -3   4  -3   40.49    2.53
   3  -4   3   40.92    2.04
   3  -4   3   34.94    2.53
   3  -4   3   43.18    2.04
  -3  -4  -3   40.54    2.56
  -3  -4  -3   33.88    2.55
   2   4   3    1.84    0.15
  -2   4  -3    1.62    0.15
  -2   4  -3    1.66    0.15
   2   4   3    1.51    0.18
   2   4   3    1.82    0.14
  -2   4  -3    1.72    0.16
   2   4   3    1.41    0.19
  -2  -4  -3    1.76    0.15
   2  -4   3    1.46    0.15
   2  -4   3    1.68    0.12
   2  -4   3    1.68    0.12
   2  -4   3    1.43    0.15
  -2  -4  -3    1.70    0.15
   2  -4   3    2.07    0.18
  -2  -4  -3    1.22    0.18
  -2  -4  -3    1.51    0.19
  -1   4  -3    0.60    0.08
   1   4   3    0.59    0.07
   1   4   3    0.74    0.07
   1   4   3    0.41    0.09
  -1   4  -3    0.70    0.08
   1  -4   3    0.65    0.06
  -1  -4  -3    0.37    0.08
  -1  -4  -3    0.67    0.11
  -1  -4  -3    0.65    0.08
  -1  -4  -3    0.87    0.09
   1  -4   3    0.76    0.09
   1  -4   3    0.65    0.09
   1  -4   3    0.50    0.08
   1  -4   3    0.74    0.06
   0   4  -3  137.73    8.77
   0   4  -3  142.49    7.04
   0   4   3  132.50    8.75
   0   4  -3  141.40    7.05
   0   4  -3  132.69    8.79
   0   4   3  131.96    8.76
   0  -4   3  126.87    8.75
   0  -4  -3  143.64    7.05
   0  -4  -3  138.68    7.05
   0  -4   3  138.43    7.07
   0  -4  -3  137.74    8.76
   0  -4   3  145.73    7.07
   0  -4  -3  130.72    8.74
   0  -4   3  133.61    8.74
   1   4  -3  322.26   21.22
   1   4  -3  330.60   17.07
   1   4  -3  332.89   17.06
  -1  -4   3  338.66   17.09
   1  -4  -3  320.09   21.13
   1  -4  -3  330.17   21.14
  -1  -4   3  317.55   21.18
  -1  -4   3  334.45   21.24
  -1  -4   3  338.98   17.10
   1  -4  -3  346.00   17.92
  -2   4   3    1.33    0.12
   2   4  -3    1.60    0.17
   2   4  -3    1.26    0.13
   2   4  -3    1.39    0.14
  -2  -4   3    1.52    0.18
  -2  -4   3    1.27    0.13
   2  -4  -3    1.74    0.13
  -2  -4   3    1.31    0.13
  -3   4   3    5.94    0.36
   3   4  -3    4.88    0.41
   3   4  -3    5.39    0.33
  -3   4   3    5.11    0.33
  -3   4   3    5.19    0.37
   3   4  -3    5.35    0.42
  -3  -4   3    4.94    0.42
   3  -4  -3    5.25    0.30
  -3  -4   3    5.22    0.32
   3  -4  -3    5.38    0.38
   3  -4  -3    5.34    0.30
  -3  -4   3    4.75    0.41
   4   4  -3    1.87    0.26
   4   4  -3    1.98    0.20
   4   4  -3    2.34    0.30
  -4   4   3    1.96    0.21
  -4   4   3    2.23    0.21
   4   4  -3    2.01    0.21
  -4  -4   3    1.85    0.19
   4  -4  -3    2.05    0.18
  -4  -4   3    2.11    0.26
   4  -4  -3    1.98    0.18
  -4  -4   3    2.05    0.19
  -4  -4   3    2.44    0.29
   4  -4  -3    2.19    0.23
   5   4  -3    2.83    0.28
  -5   4   3    2.67    0.29
   5   4  -3    3.48    0.28
   5   4  -3    2.13    0.32
   5  -4  -3    3.29    0.26
  -5  -4   3    2.86    0.26
  -5  -4   3    2.70    0.38
  -5  -4   3    3.26    0.27
   5  -4  -3    3.09    0.25
  -6   4   3    8.96    0.67
  -6   4   3    9.05    0.63
   6   4  -3    9.04    0.59
  -6   4   3    9.85    0.69
   6   4  -3    9.60    0.59
   6   4  -3    9.10    0.77
   6  -4  -3    9.84    0.58
   6  -4  -3    8.25    0.72
  -6  -4   3   10.14    0.77
   6  -4  -3   10.46    0.58
  -7   4   3    7.52    0.60
  -7   4   3    8.27    0.63
   7   4  -3    7.94    0.74
  -7  -4   3    8.47    0.74
   7  -4  -3    7.98    0.55
   7  -4  -3    8.03    0.54
   7   5   3    0.40    0.28
  -7   5  -3    0.67    0.17
  -7   5  -3    0.44    0.16
   7  -5   3    0.40    0.16
   7  -5   3    0.37    0.16
  -7  -5  -3    0.48    0.28
  -6   5  -3    1.56    0.20
   6   5   3    1.11    0.28
  -6   5  -3    1.63    0.20
  -6  -5  -3    1.38    0.29
   6  -5   3    1.26    0.17
   6  -5   3    1.72    0.19
   5   5   3   18.72    1.02
   5   5   3   19.70    1.30
   5   5   3   15.63    1.26
  -5   5  -3   18.43    1.10
  -5   5  -3   18.99    1.23
  -5   5  -3   18.32    1.23
   5  -5   3   18.16    1.00
  -5  -5  -3   19.98    1.30
  -5  -5  -3   18.46    1.02
   5  -5   3   17.46    1.24
  -5  -5  -3   17.03    1.01
   5  -5   3   20.65    1.01
  -4   5  -3   34.09    2.09
  -4   5  -3   32.75    2.10
  -4   5  -3   29.30    1.81
   4   5   3   30.40    2.13
   4   5   3   35.51    2.15
   4   5   3   31.72    1.71
   4  -5   3   33.33    1.69
  -4  -5  -3   33.70    2.14
  -4  -5  -3   31.49    2.13
   4  -5   3   34.51    2.11
   4  -5   3   30.56    1.69
  -4  -5  -3   30.97    1.71
  -3   5  -3   42.92    2.49
  -3   5  -3   47.90    2.90
  -3   5  -3   46.05    2.90
   3   5   3   45.99    2.36
   3   5   3   46.53    2.94
   3   5   3   41.53    2.93
   3   5   3   44.02    2.36
   3  -5   3   44.37    2.34
  -3  -5  -3   45.80    2.36
   3  -5   3   48.37    2.34
  -3  -5  -3   46.83    2.94
  -3  -5  -3   44.60    2.36
   3  -5   3   46.46    2.49
  -3  -5  -3   41.91    2.93
   2   5   3    2.18    0.17
   2   5   3    2.42    0.16
   2   5   3    1.54    0.21
  -2   5  -3    1.97    0.16
  -2   5  -3    1.90    0.16
   2  -5   3    2.40    0.13
  -2  -5  -3    2.10    0.17
  -2  -5  -3    2.35    0.18
  -2  -5  -3    1.70    0.22
  -1   5  -3  278.39   17.36
   1   5   3  289.71   17.42
  -1   5  -3  277.44   17.36
   1   5   3  268.81   14.00
   1   5   3  274.07   14.00
   1  -5   3  278.98   13.97
  -1  -5  -3  258.71   17.39
   1  -5   3  273.45   17.39
  -1  -5  -3  260.62   14.00
   1  -5   3  280.77   13.97
   1  -5   3  258.55   17.38
  -1  -5  -3  264.95   14.02
  -1  -5  -3  268.77   17.42
   0   5  -3    9.15    0.44
   0   5  -3    8.28    0.56
   0   5  -3    9.06    0.44
   0   5  -3    7.72    0.56
   0   5   3    7.16    0.55
   0   5   3    7.59    0.55
   0  -5   3    7.25    0.56
   0  -5  -3    7.95    0.56
   0  -5  -3    9.17    0.44
   0  -5   3    9.41    0.45
   0  -5   3    8.11    0.56
   0  -5  -3    8.56    0.44
   0  -5   3    8.73    0.45
   1   5  -3   72.34    4.59
   1   5  -3   72.19    3.69
   1   5  -3   69.54    3.69
  -1  -5   3   72.52    4.60
  -1  -5   3   71.14    3.69
  -1  -5   3   70.68    4.59
  -1  -5   3   71.17    3.70
   1  -5  -3   69.37    4.57
   1  -5  -3   73.70    4.58
   2   5  -3    3.90    0.23
   2   5  -3    3.98    0.23
   2   5  -3    2.94    0.30
   2   5  -3    3.31    0.29
   2  -5  -3    2.96    0.24
  -2  -5   3    3.40    0.30
  -2  -5   3    2.85    0.28
   2  -5  -3    4.07    0.23
  -2  -5   3    3.94    0.23
  -2  -5   3    3.92    0.23
   2  -5  -3    3.33    0.24
   3   5  -3   23.50    1.24
   3   5  -3   26.10    1.56
   3   5  -3   21.34    1.54
  -3   5   3   22.28    1.29
   3   5  -3   21.35    1.24
  -3  -5   3   23.63    1.55
   3  -5  -3   24.90    1.52
  -3  -5   3   24.80    1.55
  -3  -5   3   22.93    1.24
   3  -5  -3   23.25    1.21
   3  -5  -3   22.56    1.21
   4   5  -3    5.37    0.37
  -4   5   3    6.26    0.40
  -4   5   3    5.75    0.39
  -4   5   3    5.90    0.39
   4   5  -3    5.09    0.47
   4   5  -3    6.55    0.49
   4  -5  -3    5.50    0.34
   4  -5  -3    6.55    0.44
  -4  -5   3    5.71    0.47
  -4  -5   3    4.94    0.36
  -4  -5   3    5.57    0.49
   4  -5  -3    5.75    0.34
  -4  -5   3    5.24    0.37
   5   5  -3   15.46    1.11
  -5   5   3   15.45    1.02
   5   5  -3   14.20    0.86
  -5   5   3   16.28    1.03
   5   5  -3   14.85    0.87
  -5   5   3   15.13    0.92
   5  -5  -3   16.02    0.85
  -5  -5   3   16.51    1.11
   5  -5  -3   16.95    0.85
  -5  -5   3   14.43    0.86
  -5  -5   3   15.17    0.86
   5  -5  -3   14.67    1.05
  -6   5   3    0.97    0.15
   6   5  -3    0.64    0.15
  -6   5   3    0.85    0.15
   6   5  -3    0.77    0.25
  -6   5   3    0.79    0.18
  -6  -5   3    0.70    0.25
   6  -5  -3    0.79    0.15
   6  -5  -3    0.92    0.15
  -7   5   3    0.55    0.16
  -7   5   3    0.43    0.14
   7   5  -3    0.48    0.27
   7  -5  -3    0.44    0.15
   7  -5  -3    0.43    0.16
  -7  -5   3    0.31    0.26
  -7   6  -3    0.21    0.12
   7   6   3    0.52    0.29
  -7   6  -3    0.19    0.13
  -7  -6  -3    0.10    0.26
   7  -6   3    0.03    0.15
   7  -6   3    0.02    0.15
  -6   6  -3    6.26    0.46
   6   6   3    6.10    0.62
  -6   6  -3    5.99    0.46
  -6  -6  -3    6.16    0.61
   6  -6   3    6.94    0.43
   6  -6   3    6.12    0.43
   5   6   3   13.96    0.87
  -5   6  -3   15.83    1.03
  -5   6  -3   14.31    0.94
   5   6   3   13.09    1.09
   5   6   3   14.99    0.88
   5   6   3   18.30    1.14
  -5   6  -3   17.60    1.03
  -5  -6  -3   17.71    1.13
  -5  -6  -3   15.01    0.88
   5  -6   3   16.52    0.86
  -5  -6  -3   15.04    1.10
   5  -6   3   15.34    0.86
  -5  -6  -3   13.72    0.87
   5  -6   3   16.81    1.07
  -4   6  -3   45.24    2.73
   4   6   3   42.84    2.24
  -4   6  -3   38.75    2.36
   4   6   3   39.22    2.78
   4   6   3   47.61    2.80
   4   6   3   40.91    2.23
   4  -6   3   42.67    2.75
  -4  -6  -3   42.37    2.24
   4  -6   3   41.49    2.21
  -4  -6  -3   38.98    2.78
   4  -6   3   45.91    2.21
  -4  -6  -3   44.15    2.79
   3   6   3   21.90    1.23
   3   6   3   22.85    1.23
   3   6   3   25.58    1.55
   3   6   3   21.49    1.53
   3  -6   3   24.18    1.21
  -3  -6  -3   22.98    1.24
  -3  -6  -3   23.75    1.54
  -3  -6  -3   24.97    1.55
   3  -6   3   22.16    1.31
   3  -6   3   22.74    1.51
   3  -6   3   22.45    1.21
  -3  -6  -3   22.53    1.23
   2   6   3    9.51    0.50
   2   6   3    9.46    0.50
   2   6   3    8.15    0.64
   2  -6   3    9.36    0.48
   2  -6   3   10.09    0.48
   2  -6   3    9.08    0.61
  -2  -6  -3    9.63    0.51
  -2  -6  -3    8.75    0.64
  -2  -6  -3    7.87    0.63
  -2  -6  -3    9.52    0.51
   2  -6   3    9.50    0.56
   2  -6   3    8.28    0.61
   1   6   3   93.90    5.05
   1   6   3   96.79    5.04
   1   6   3   95.29    6.27
   1   6   3  106.90    6.28
  -1  -6  -3   97.86    5.05
   1  -6   3   97.30    5.04
   1  -6   3  100.01    6.26
  -1  -6  -3   97.76    6.28
  -1  -6  -3   99.37    6.28
   1  -6   3   95.36    6.27
  -1  -6  -3   96.96    5.05
   1  -6   3   99.75    5.04
   0   6  -3    3.84    0.29
   0   6  -3    3.95    0.28
   0   6   3    3.76    0.27
   0   6   3    3.76    0.27
   0  -6  -3    3.38    0.28
   0  -6   3    3.65    0.28
   0  -6  -3    4.19    0.22
   0  -6  -3    3.86    0.28
   0  -6   3    4.39    0.23
   0  -6   3    4.48    0.23
   0  -6  -3    3.98    0.22
   0  -6   3    4.06    0.29
   1   6  -3  202.51   10.56
   1   6  -3  204.81   10.54
   1   6  -3  212.99   13.16
  -1  -6   3  200.19   10.57
  -1  -6   3  202.66   10.62
  -1  -6   3  193.40   13.07
  -1  -6   3  207.43   13.08
   1  -6  -3  213.43   13.08
   2   6  -3   41.78    2.48
   2   6  -3   37.80    2.47
   2   6  -3   37.29    1.99
  -2  -6   3   39.33    2.48
   2  -6  -3   36.17    2.44
  -2  -6   3   38.93    2.48
   2  -6  -3   36.41    2.08
  -2  -6   3   36.27    1.99
   2  -6  -3   42.21    2.44
  -2  -6   3   35.35    1.99
   3   6  -3    1.22    0.17
   3   6  -3    1.00    0.17
   3   6  -3    1.03    0.12
   3   6  -3    0.95    0.12
  -3  -6   3    1.36    0.18
   3  -6  -3    1.03    0.08
   3  -6  -3    1.32    0.14
  -3  -6   3    0.90    0.17
  -3  -6   3    1.22    0.14
   3  -6  -3    0.93    0.08
  -3  -6   3    1.14    0.13
   4   6  -3   93.80    4.94
  -4   6   3   92.36    5.19
   4   6  -3  102.63    6.16
   4   6  -3   87.73    6.14
   4   6  -3   93.86    4.94
   4  -6  -3  104.08    4.92
  -4  -6   3   97.94    6.15
  -4  -6   3   86.40    6.14
   4  -6  -3   97.37    4.91
  -4  -6   3   97.27    4.95
   4  -6  -3   96.24    6.11
   5   6  -3    7.94    0.52
   5   6  -3    9.49    0.70
   5   6  -3    7.30    0.66
  -5   6   3    8.40    0.55
  -5  -6   3    7.63    0.51
   5  -6  -3    9.65    0.50
   5  -6  -3    9.04    0.50
  -5  -6   3    9.45    0.70
   5  -6  -3    8.93    0.63
  -5  -6   3    8.40    0.52
  -5  -6   3    7.49    0.65
  -6   6   3   29.27    1.87
   6   6  -3   35.28    2.24
   6  -6  -3   31.88    1.75
  -6  -6   3   35.06    2.24
   6  -6  -3   33.67    1.76
   7   6  -3    0.47    0.28
  -7  -6   3    0.47    0.27
   7  -6  -3    0.61    0.17
   7  -6  -3    0.59    0.17
   7   7   3    7.08    0.72
   7  -7   3    7.09    0.50
   7  -7   3    6.73    0.50
  -7  -7  -3    7.86    0.73
   6   7   3   14.71    1.10
   6  -7   3   14.74    0.83
  -6  -7  -3   14.51    1.10
   5   7   3   13.75    0.94
  -5   7  -3   12.13    0.78
   5   7   3   11.66    0.72
   5   7   3   11.70    0.72
   5   7   3   11.08    0.90
  -5  -7  -3   11.61    0.72
  -5  -7  -3   14.01    0.94
  -5  -7  -3   11.02    0.90
  -5  -7  -3   12.45    0.72
   5  -7   3   13.10    0.70
   5  -7   3   12.26    0.86
   5  -7   3   14.19    0.70
   4   7   3   11.12    0.69
   4   7   3   11.25    0.86
   4   7   3   12.07    0.70
  -4  -7  -3   13.38    0.89
  -4  -7  -3   11.96    0.69
   4  -7   3   11.50    0.66
  -4  -7  -3   10.99    0.69
   4  -7   3   13.91    0.84
  -4  -7  -3   12.80    0.88
   4  -7   3   12.67    0.66
   3   7   3   54.11    3.85
   3   7   3   59.94    3.10
   3   7   3   60.88    3.86
   3   7   3   58.67    3.09
  -3  -7  -3   51.38    3.85
   3  -7   3   59.34    3.82
   3  -7   3   65.05    3.07
  -3  -7  -3   60.22    3.86
   3  -7   3   63.30    3.28
   3  -7   3   60.95    3.07
  -3  -7  -3   59.29    3.10
  -3  -7  -3   61.73    3.10
   2   7   3   82.31    4.27
   2   7   3   83.88    4.27
   2   7   3   83.32    5.32
  -2  -7  -3   89.03    4.28
   2  -7   3   79.78    5.29
  -2  -7  -3   71.49    5.31
   2  -7   3   87.75    4.52
  -2  -7  -3   83.74    5.32
  -2  -7  -3   84.19    4.28
   1   7   3  312.02   15.75
   1   7   3  302.61   19.61
   1   7   3  296.34   15.75
   1   7   3  325.72   19.63
   1  -7   3  322.03   15.73
   1  -7   3  312.90   19.58
   1  -7   3  305.49   15.72
  -1  -7  -3  304.57   15.81
  -1  -7  -3  311.86   15.76
  -1  -7  -3  285.76   19.52
  -1  -7  -3  304.58   19.64
   1  -7   3  291.04   19.57
   0   7   3   19.55    1.29
   0   7  -3   20.04    1.30
   0   7   3   19.34    1.29
   0   7  -3   19.43    1.30
   0  -7   3   20.90    1.05
   0  -7  -3   20.63    1.04
   0  -7  -3   19.86    1.30
   0  -7   3   17.58    1.30
   0  -7   3   19.83    1.31
   0  -7   3   20.86    1.05
   0  -7  -3   22.06    1.04
   1   7  -3   32.80    2.16
   1   7  -3   33.65    1.73
   1   7  -3   35.13    2.16
   1   7  -3   33.54    1.73
  -1  -7   3   33.70    2.16
  -1  -7   3   30.28    2.16
  -1  -7   3   33.20    1.74
  -1  -7   3   33.78    1.74
   1  -7  -3   33.39    2.13
   1  -7  -3   33.33    2.13
   2   7  -3   58.47    3.15
   2   7  -3   59.40    3.15
   2   7  -3   68.06    3.93
  -2  -7   3   59.34    3.16
  -2  -7   3   57.55    3.15
  -2  -7   3   59.94    3.92
   2  -7  -3   61.38    3.31
  -2  -7   3   62.82    3.93
   3   7  -3   66.79    3.51
   3   7  -3   69.52    3.51
   3   7  -3   63.63    4.37
   3   7  -3   69.64    4.37
   3  -7  -3   73.96    3.69
  -3  -7   3   68.59    3.51
   3  -7  -3   67.23    4.33
  -3  -7   3   69.38    3.52
  -3  -7   3   59.06    4.36
  -3  -7   3   68.69    4.37
   4   7  -3    7.60    0.49
   4   7  -3    9.44    0.66
   4   7  -3    7.37    0.63
   4   7  -3    8.16    0.50
   4  -7  -3    8.87    0.46
  -4  -7   3    8.26    0.51
  -4  -7   3    7.04    0.62
   4  -7  -3    8.80    0.46
  -4  -7   3    8.86    0.65
   4  -7  -3    8.35    0.58
   5   7  -3   -0.04    0.19
   5   7  -3    0.03    0.09
  -5   7   3    0.11    0.12
   5   7  -3   -0.05    0.15
   5   7  -3    0.03    0.10
   5  -7  -3   -0.03    0.12
  -5  -7   3   -0.07    0.14
   5  -7  -3    0.11    0.09
  -5  -7   3   -0.01    0.18
  -5  -7   3   -0.02    0.11
  -5  -7   3    0.06    0.10
   5  -7  -3    0.18    0.09
  -6   7   3    2.37    0.30
   6   7  -3    3.28    0.48
  -6  -7   3    2.88    0.38
   6  -7  -3    2.72    0.27
   6  -7  -3    2.38    0.27
   7   7  -3    1.96    0.37
  -7  -7   3    1.66    0.35
   7  -7  -3    1.49    0.21
   7  -7  -3    1.27    0.21
   7   8   3    2.89    0.43
   7  -8   3    2.96    0.33
   7  -8   3    2.79    0.33
  -7  -8  -3    2.43    0.40
   6   8   3    7.11    0.71
   6  -8   3    7.44    0.49
  -6  -8  -3    8.11    0.71
   6  -8   3    8.15    0.50
   5   8   3   28.23    1.56
   5   8   3   28.95    1.96
   5  -8   3   31.92    1.53
   5  -8   3   26.22    1.90
  -5  -8  -3   28.27    1.55
  -5  -8  -3   29.53    1.97
   5  -8   3   29.40    1.53
   4   8   3   55.02    2.96
   4   8   3   55.31    2.96
   4   8   3   49.61    3.68
   4   8   3   59.30    3.70
   4  -8   3   62.28    2.93
  -4  -8  -3   56.47    2.97
  -4  -8  -3   57.43    2.97
   4  -8   3   60.99    3.14
  -4  -8  -3   60.32    3.71
   4  -8   3   50.96    3.65
   4  -8   3   56.22    2.93
   3   8   3   54.80    3.47
   3   8   3   52.39    2.78
   3   8   3   50.83    2.77
   3   8   3   49.76    3.46
   3  -8   3   57.73    2.75
  -3  -8  -3   53.50    2.78
  -3  -8  -3   53.97    2.79
   3  -8   3   50.96    3.43
   3  -8   3   54.86    2.94
   3  -8   3   54.36    2.75
  -3  -8  -3   53.55    3.47
   2   8   3    8.78    0.69
   2   8   3    9.69    0.55
   2   8   3   10.11    0.55
   2   8   3   10.95    0.71
  -2  -8  -3   10.29    0.57
  -2  -8  -3   10.19    0.57
   2  -8   3   10.31    0.62
  -2  -8  -3   10.77    0.71
   2  -8   3    9.65    0.67
   1   8   3   58.83    3.08
   1   8   3   57.88    3.85
   1   8   3   58.23    3.08
   1   8   3   58.78    3.85
  -1  -8  -3   62.57    3.10
  -1  -8  -3   58.71    3.10
   1  -8   3   61.03    3.84
   1  -8   3   60.71    3.08
  -1  -8  -3   59.80    3.85
   1  -8   3   62.60    3.08
   0   8   3   80.87    5.41
   0   8  -3   84.30    5.42
   0   8   3   82.87    5.41
   0   8  -3   81.56    5.42
   0  -8   3   90.07    4.36
   0  -8  -3   85.10    5.42
   0  -8   3   85.10    5.43
   0  -8   3   87.92    4.36
   0  -8   3   74.32    5.42
   0  -8  -3   86.61    4.36
   0  -8  -3   93.79    4.36
   1   8  -3    6.48    0.46
   1   8  -3    6.57    0.46
   1   8  -3    6.83    0.35
   1   8  -3    6.65    0.35
  -1  -8   3    6.33    0.46
  -1  -8   3    6.69    0.37
   1  -8  -3    6.35    0.42
  -1  -8   3    6.89    0.37
   1  -8  -3    5.25    0.42
  -1  -8   3    5.25    0.45
   2   8  -3  147.77    9.81
   2   8  -3  152.19    7.89
   2   8  -3  147.55    7.89
  -2  -8   3  154.67    7.90
  -2  -8   3  156.65    7.90
   2  -8  -3  168.17    8.30
  -2  -8   3  146.98    9.82
   3   8  -3    0.00    0.07
   3   8  -3   -0.09    0.15
   3   8  -3    0.03    0.12
   3   8  -3    0.12    0.08
  -3  -8   3    0.08    0.14
  -3  -8   3    0.11    0.09
  -3  -8   3    0.05    0.08
   3  -8  -3    0.03    0.06
   3  -8  -3    0.19    0.09
   4   8  -3    0.41    0.11
   4   8  -3    0.83    0.23
   4   8  -3    0.57    0.12
   4   8  -3    0.37    0.17
  -4  -8   3    0.72    0.14
  -4  -8   3    0.34    0.12
   4  -8  -3    1.21    0.13
  -4  -8   3    0.56    0.19
   4  -8  -3    0.79    0.09
   4  -8  -3    0.88    0.08
   5   8  -3   60.06    3.64
   5   8  -3   51.77    2.90
  -5  -8   3   51.53    2.91
   5  -8  -3   60.41    2.87
  -5  -8   3   57.92    3.63
   5  -8  -3   50.63    3.57
   5  -8  -3   54.95    2.87
   6   8  -3    2.93    0.40
  -6   8   3    3.04    0.33
   6  -8  -3    3.83    0.30
   6  -8  -3    3.50    0.30
  -6  -8   3    3.36    0.49
   7   8  -3    1.69    0.37
   7  -8  -3    1.88    0.22
  -7  -8   3    1.56    0.34
   7  -8  -3    1.54    0.21
   6   9   3    0.94    0.29
   6  -9   3    0.43    0.14
   6  -9   3    0.31    0.14
  -6  -9  -3    0.90    0.28
   5   9   3    0.28    0.22
   5  -9   3    0.55    0.11
  -5  -9  -3    0.39    0.22
   5  -9   3    0.47    0.12
  -5  -9  -3    0.45    0.15
   4   9   3    2.19    0.23
   4   9   3    2.14    0.30
   4   9   3    1.92    0.30
   4   9   3    2.07    0.22
   4  -9   3    2.49    0.30
  -4  -9  -3    2.20    0.26
   4  -9   3    2.10    0.24
  -4  -9  -3    2.40    0.26
  -4  -9  -3    2.25    0.29
   4  -9   3    2.60    0.18
   4  -9   3    3.04    0.19
   3   9   3   18.00    1.05
   3   9   3   18.51    1.05
   3   9   3   22.37    1.34
   3  -9   3   18.27    1.28
  -3  -9  -3   19.46    1.33
   3  -9   3   19.82    1.02
   3  -9   3   21.13    1.02
   3  -9   3   20.02    1.14
  -3  -9  -3   19.57    1.07
  -3  -9  -3   18.67    1.06
   2   9   3  128.69    8.35
   2   9   3  123.52    8.34
   2   9   3  130.47    6.70
  -2  -9  -3  130.61    8.35
   2  -9   3  138.55    7.09
  -2  -9  -3  132.42    6.72
   2  -9   3  123.75    8.32
  -2  -9  -3  135.00    6.72
   1   9   3    4.49    0.38
   1   9   3    4.71    0.37
  -1  -9  -3    4.84    0.39
  -1  -9  -3    5.56    0.31
   1  -9   3    5.29    0.28
   1  -9   3    5.71    0.28
   1  -9   3    5.00    0.36
  -1  -9  -3    5.08    0.31
   0   9  -3   49.40    3.16
   0   9  -3   48.01    3.16
   0  -9  -3   49.75    3.17
   0  -9   3   50.29    2.55
   0  -9   3   47.99    2.55
   0  -9   3   49.42    3.18
   0  -9  -3   51.20    2.54
   0  -9  -3   48.50    2.54
   1   9  -3    0.30    0.10
   1   9  -3    0.34    0.11
   1   9  -3    0.51    0.05
  -1  -9   3    0.36    0.08
   1  -9  -3    0.29    0.06
  -1  -9   3    0.30    0.10
  -1  -9   3    0.46    0.08
   2   9  -3    1.60    0.19
   2   9  -3    1.41    0.13
   2   9  -3    1.40    0.13
  -2  -9   3    1.23    0.14
  -2  -9   3    1.36    0.15
  -2  -9   3    1.74    0.24
   2  -9  -3    1.20    0.14
   3   9  -3   36.23    2.42
   3   9  -3   36.41    1.93
   3   9  -3   33.13    2.41
  -3  -9   3   36.33    2.42
  -3  -9   3   37.80    1.94
   3  -9  -3   39.46    2.03
  -3  -9   3   38.12    1.94
   4   9  -3    8.29    0.55
   4   9  -3   10.12    0.74
   4   9  -3    7.97    0.70
   4   9  -3    9.76    0.56
   4  -9  -3    9.61    0.49
   4  -9  -3    9.90    0.50
  -4  -9   3    9.51    0.56
  -4  -9   3    8.55    0.56
  -4  -9   3    9.47    0.73
   5   9  -3    1.28    0.18
   5   9  -3    1.78    0.31
   5  -9  -3    1.81    0.19
  -5  -9   3    2.06    0.31
  -5  -9   3    1.81    0.22
   5  -9  -3    1.72    0.18
   6   9  -3    0.38    0.28
   6  -9  -3    0.55    0.14
   6  -9  -3    0.58    0.14
  -6  -9   3    0.76    0.28
   6  10   3    1.18    0.33
  -6 -10  -3    1.30    0.31
   6 -10   3    1.27    0.17
   6 -10   3    1.18    0.17
   5  10   3   14.18    0.98
   5 -10   3   12.57    0.70
  -5 -10  -3   12.40    0.96
   5 -10   3   11.45    0.69
   4  10   3    0.64    0.21
   4  10   3    0.18    0.10
   4  10   3    0.18    0.15
   4 -10   3    0.13    0.16
  -4 -10  -3    0.15    0.12
  -4 -10  -3    0.51    0.20
   4 -10   3    0.31    0.08
  -4 -10  -3    0.22    0.13
   4 -10   3    0.33    0.08
   3  10   3   27.11    1.59
  -3 -10  -3   30.49    1.61
   3 -10   3   30.52    1.71
   3 -10   3   29.06    1.95
  -3 -10  -3   30.54    1.61
  -3 -10  -3   33.58    2.02
   2  10   3    9.69    0.74
   2  10   3    9.68    0.73
  -2 -10  -3   11.56    0.60
   2 -10   3   11.29    0.66
   2 -10   3    9.97    0.70
  -2 -10  -3   11.18    0.60
  -2 -10  -3   10.34    0.75
   1  10   3    7.40    0.50
   1  10   3    7.11    0.49
  -1 -10  -3    6.72    0.40
   1 -10   3    7.20    0.38
  -1 -10  -3    6.96    0.51
   1 -10   3    6.58    0.38
  -1 -10  -3    6.78    0.40
   1 -10   3    6.71    0.48
   0  10  -3   53.28    3.20
   0  10  -3   52.86    3.20
   0 -10  -3   45.90    2.58
   0 -10   3   49.42    3.22
   0 -10  -3   50.37    3.21
   0 -10   3   46.35    2.58
   0 -10  -3   48.69    2.58
   0 -10   3   52.58    2.59
   1  10  -3   88.17    5.58
   1  10  -3   92.02    5.58
  -1 -10   3   85.34    4.49
  -1 -10   3   81.72    4.49
  -1 -10   3   86.35    5.59
   1 -10  -3   88.38    5.56
   2  10  -3   24.02    1.32
   2  10  -3   24.02    1.66
   2  10  -3   24.64    1.66
   2 -10  -3   27.06    1.41
  -2 -10   3   25.37    1.34
  -2 -10   3   25.67    1.67
  -2 -10   3   24.86    1.34
   3  10  -3   25.58    1.53
   3  10  -3   33.11    1.94
  -3 -10   3   29.33    1.93
   3 -10  -3   29.00    1.62
  -3 -10   3   28.05    1.55
  -3 -10   3   28.87    1.55
   4  10  -3    2.12    0.29
   4  10  -3    1.39    0.24
  -4 -10   3    1.77    0.20
  -4 -10   3    1.38    0.19
  -4 -10   3    1.58    0.26
   5  10  -3   -0.14    0.23
   5 -10  -3    0.26    0.10
  -5 -10   3   -0.09    0.20
   5 -10  -3    0.19    0.09
   6  10  -3    9.57    0.78
   6 -10  -3    7.22    0.49
  -6 -10   3    9.00    0.76
   6 -10  -3    7.68    0.50
   6  11   3   18.59    1.28
   6 -11   3   14.97    0.93
   6 -11   3   17.05    0.94
  -6 -11  -3   17.24    1.27
   5  11   3    7.11    0.66
  -5 -11  -3    6.61    0.64
   5 -11   3    6.11    0.40
   5 -11   3    7.18    0.41
   4  11   3   -0.10    0.20
   4 -11   3    0.00    0.07
   4 -11   3    0.07    0.07
   4 -11   3   -0.08    0.15
  -4 -11  -3   -0.31    0.18
  -4 -11  -3   -0.18    0.12
  -4 -11  -3   -0.13    0.11
   3  11   3    1.45    0.23
   3  11   3    1.07    0.19
  -3 -11  -3    1.06    0.16
  -3 -11  -3    1.21    0.16
   3 -11   3    1.28    0.20
  -3 -11  -3    1.32    0.23
   2  11   3    3.48    0.32
   2  11   3    3.80    0.35
   2 -11   3    3.76    0.33
  -2 -11  -3    3.63    0.35
  -2 -11  -3    3.81    0.28
   2 -11   3    3.66    0.28
  -2 -11  -3    3.68    0.28
   1  11   3   23.27    1.45
   1  11   3   22.66    1.45
   1 -11   3   22.74    1.16
  -1 -11  -3   21.09    1.17
   1 -11   3   21.36    1.15
  -1 -11  -3   21.76    1.17
   1 -11   3   21.42    1.44
  -1 -11  -3   22.51    1.47
   0  11  -3   14.41    0.94
   0 -11   3   15.24    0.77
   0 -11   3   13.80    0.96
   0 -11   3   13.74    0.77
   0 -11  -3   14.90    0.76
   0 -11  -3   13.89    0.76
   0 -11  -3   14.34    0.96
   1  11  -3   31.94    2.11
   1  11  -3   31.06    2.10
  -1 -11   3   31.54    2.11
  -1 -11   3   33.17    1.70
  -1 -11   3   36.52    1.70
   1 -11  -3   29.72    2.08
   2  11  -3   42.37    2.42
   2  11  -3   35.89    2.40
  -2 -11   3   37.22    2.42
   2 -11  -3   36.03    2.04
  -2 -11   3   35.03    1.94
  -2 -11   3   34.12    1.94
   3  11  -3   41.35    2.47
  -3 -11   3   36.72    1.98
  -3 -11   3   37.42    2.47
   3 -11  -3   37.05    2.07
  -3 -11   3   34.29    1.98
   4  11  -3   15.37    1.00
  -4 -11   3   13.71    0.98
  -4 -11   3   11.99    0.76
  -4 -11   3   12.17    0.77
   5  11  -3    4.95    0.58
   5 -11  -3    5.54    0.33
  -5 -11   3    4.88    0.56
   5 -11  -3    5.61    0.33
   6  11  -3    0.36    0.29
   6 -11  -3    0.32    0.13
  -6 -11   3    0.08    0.26
   6 -11  -3    0.39    0.13
   5  12   3    4.07    0.54
   5 -12   3    3.85    0.28
   5 -12   3    4.13    0.29
  -5 -12  -3    3.78    0.52
   4  12   3   16.17    1.20
   4 -12   3   16.89    0.89
  -4 -12  -3   16.41    1.20
  -4 -12  -3   15.09    0.95
  -4 -12  -3   16.39    0.95
   4 -12   3   17.13    1.02
   4 -12   3   18.13    0.88
   3  12   3   12.08    0.91
   3  12   3   13.99    0.94
  -3 -12  -3   13.32    0.75
  -3 -12  -3   13.12    0.94
  -3 -12  -3   12.22    0.75
   3 -12   3   13.33    0.82
   2  12   3    3.51    0.36
   2  12   3    3.46    0.33
  -2 -12  -3    3.23    0.36
   2 -12   3    4.06    0.35
   2 -12   3    3.61    0.21
   2 -12   3    3.94    0.21
  -2 -12  -3    3.94    0.29
  -2 -12  -3    3.55    0.29
   1  12   3    1.37    0.17
   1  12   3    1.53    0.20
  -1 -12  -3    1.41    0.19
   1 -12   3    1.25    0.13
   1 -12   3    1.28    0.13
   1 -12   3    1.33    0.18
  -1 -12  -3    1.14    0.14
  -1 -12  -3    1.32    0.14
   0 -12  -3   99.35    6.87
   0 -12  -3  113.53    5.53
   0 -12   3  105.61    5.53
   0 -12   3  103.64    6.88
   0 -12   3  116.96    5.54
   0 -12  -3  105.31    5.53
   1  12  -3   72.80    4.58
   1  12  -3   72.71    4.59
  -1 -12   3   76.23    3.70
  -1 -12   3   68.97    3.69
  -1 -12   3   69.28    4.60
   1 -12  -3   67.94    4.57
   2  12  -3   32.71    2.33
   2  12  -3   36.64    2.35
  -2 -12   3   34.30    2.35
   2 -12  -3   37.26    1.99
  -2 -12   3   37.79    1.89
  -2 -12   3   35.90    1.89
   3  12  -3    1.70    0.22
   3  12  -3    2.08    0.26
  -3 -12   3    1.32    0.17
   3 -12  -3    1.41    0.18
  -3 -12   3    1.04    0.16
  -3 -12   3    1.45    0.24
   4  12  -3    3.66    0.44
  -4 -12   3    2.65    0.29
  -4 -12   3    2.87    0.40
  -4 -12   3    2.48    0.30
   4 -12  -3    2.53    0.28
   5  12  -3   40.86    2.59
  -5 -12   3   36.81    2.59
   5 -12  -3   37.04    1.99
   5 -12  -3   39.11    2.00
   6  12  -3    4.97    0.64
   5  13   3   23.01    1.53
   5 -13   3   20.50    1.29
   5 -13   3   19.95    1.14
   5 -13   3   22.47    1.15
   4  13   3    0.89    0.26
   4 -13   3    1.17    0.14
  -4 -13  -3    0.97    0.20
   4 -13   3    1.43    0.24
   4 -13   3    1.27    0.12
  -4 -13  -3    1.13    0.19
  -4 -13  -3    1.03    0.26
   3  13   3    4.27    0.43
   3  13   3    4.81    0.48
   3 -13   3    5.73    0.44
  -3 -13  -3    5.45    0.38
  -3 -13  -3    4.81    0.38
  -3 -13  -3    4.81    0.48
   3 -13   3    5.24    0.28
   2  13   3   76.77    5.19
   2  13   3   77.17    5.20
  -2 -13  -3   77.04    5.22
   2 -13   3   85.82    4.15
   2 -13   3   80.66    4.15
   2 -13   3   83.90    4.44
  -2 -13  -3   78.44    4.19
  -2 -13  -3   86.16    4.20
   1  13   3   10.27    0.77
   1  13   3   10.44    0.77
   1 -13   3   11.08    0.78
  -1 -13  -3   10.42    0.80
   1 -13   3   12.24    0.62
  -1 -13  -3   11.75    0.65
   1 -13   3   12.83    0.63
  -1 -13  -3   12.81    0.65
   0 -13  -3   42.62    2.90
   0 -13   3   42.31    2.90
   0 -13  -3   48.63    2.33
   0 -13   3   44.59    2.33
   0 -13  -3   45.48    2.33
   1  13  -3   37.14    2.51
   1  13  -3   38.40    2.52
  -1 -13   3   37.49    2.53
  -1 -13   3   37.95    2.03
  -1 -13   3   41.01    2.04
   1 -13  -3   38.28    2.00
   1 -13  -3   40.81    2.00
   2  13  -3    1.30    0.21
   2  13  -3    0.94    0.18
  -2 -13   3    1.23    0.16
  -2 -13   3    1.19    0.16
  -2 -13   3    0.87    0.20
   2 -13  -3    1.45    0.18
   3  13  -3   11.70    0.94
   3  13  -3   12.92    0.96
  -3 -13   3   14.68    0.78
  -3 -13   3   13.01    0.77
   3 -13  -3   14.44    0.81
  -3 -13   3   13.04    0.97
   4  13  -3   14.56    1.05
  -4 -13   3   13.04    0.82
   4 -13  -3   14.55    0.85
  -4 -13   3   13.30    1.04
   5  13  -3    0.94    0.30
   5 -13  -3    1.19    0.12
   5 -13  -3    1.50    0.14
   5  14   3    0.40    0.28
   5 -14   3    0.25    0.10
   5 -14   3   -0.08    0.19
   5 -14   3    0.12    0.10
   4  14   3    1.56    0.31
   4 -14   3    2.35    0.18
  -4 -14  -3    1.82    0.24
   4 -14   3    2.02    0.18
   4 -14   3    2.51    0.29
   3  14   3    6.63    0.53
   3 -14   3    6.92    0.36
   3 -14   3    6.17    0.51
   3 -14   3    6.56    0.36
  -3 -14  -3    5.69    0.46
  -3 -14  -3    6.31    0.46
   2  14   3    1.53    0.20
   2  14   3    1.61    0.22
   2 -14   3    1.44    0.14
  -2 -14  -3    1.47    0.23
  -2 -14  -3    1.25    0.17
   2 -14   3    1.46    0.14
   2 -14   3    1.46    0.23
  -2 -14  -3    1.24    0.18
   1  14   3    0.51    0.12
   1  14   3    0.73    0.11
  -1 -14  -3    0.74    0.13
   1 -14   3    0.78    0.10
   1 -14   3    0.82    0.11
  -1 -14  -3    0.73    0.13
  -1 -14  -3    0.63    0.17
   0 -14   3    3.28    0.30
   0 -14  -3    3.00    0.23
   0 -14   3    2.81    0.24
   0 -14   3    2.72    0.24
   0 -14  -3    3.28    0.29
   0 -14  -3    2.98    0.23
   1  14  -3   12.99    0.94
   1  14  -3   12.13    0.92
  -1 -14   3   15.88    0.78
   1 -14  -3   15.37    0.74
  -1 -14   3   12.52    0.97
  -1 -14   3   14.02    0.78
   1 -14  -3   13.93    0.74
   2  14  -3    6.81    0.55
   2  14  -3    6.63    0.57
  -2 -14   3    7.55    0.48
   2 -14  -3    8.10    0.50
  -2 -14   3    6.73    0.59
  -2 -14   3    8.24    0.48
   3  14  -3    0.57    0.22
  -3 -14   3    0.46    0.15
   3 -14  -3    0.85    0.17
  -3 -14   3    0.80    0.17
   4  14  -3    1.06    0.27
   4 -14  -3    0.83    0.18
   5  14  -3    0.18    0.27
   4  15   3    1.10    0.28
   4 -15   3    0.93    0.24
   4 -15   3    1.13    0.11
   4 -15   3    1.11    0.12
  -3 -15  -3   10.80    0.67
  -3 -15  -3   10.05    0.66
   3 -15   3    9.96    0.72
   3 -15   3   10.82    0.57
   3 -15   3   10.74    0.57
   2  15   3   16.90    1.01
   2  15   3   14.26    0.99
  -2 -15  -3   13.76    0.83
   2 -15   3   14.55    0.78
   2 -15   3   14.29    0.78
   2 -15   3   13.68    0.91
  -2 -15  -3   13.87    0.83
  -1 -15  -3   20.46    1.13
  -1 -15  -3   20.08    1.12
   1 -15   3   21.84    1.10
   1 -15   3   20.10    1.10
   0 -15   3    0.21    0.09
   0 -15  -3    0.22    0.10
   0 -15   3    0.19    0.11
   0 -15  -3    0.19    0.09
   1  15  -3    1.71    0.23
   1  15  -3    1.74    0.20
  -1 -15   3    2.01    0.20
  -1 -15   3    1.89    0.23
   1 -15  -3    1.85    0.16
   1 -15  -3    1.88    0.17
   2  15  -3    0.02    0.14
   2  15  -3    0.04    0.16
  -2 -15   3    0.14    0.14
  -2 -15   3    0.14    0.13
   2 -15  -3    0.17    0.14
   3  15  -3   12.45    0.88
  -3 -15   3   10.66    0.69
  -3 -15   3   10.25    0.69
   3 -15  -3   11.36    0.71
   4  15  -3    2.71    0.36
   4 -15  -3    2.37    0.27
   4  16   3   13.78    0.96
   4 -16   3   11.35    0.82
   4 -16   3   12.05    0.66
   4 -16   3   11.58    0.66
   3  16   3    6.75    0.56
   3 -16   3    5.66    0.50
  -3 -16  -3    5.44    0.45
   3 -16   3    5.62    0.35
  -3 -16  -3    5.76    0.46
   3 -16   3    6.08    0.35
   2  16   3    0.03    0.16
   2  16   3    0.22    0.13
   2 -16   3    0.35    0.09
   2 -16   3    0.25    0.09
  -2 -16  -3    0.33    0.16
  -2 -16  -3    0.30    0.15
   2 -16   3    0.37    0.20
   1 -16   3    1.94    0.19
   1 -16   3    2.04    0.21
  -1 -16  -3    1.96    0.20
  -1 -16  -3    1.75    0.20
   0 -16  -3   28.22    1.48
   0 -16  -3   26.85    1.48
   0 -16   3   28.81    1.49
   0 -16   3   27.36    1.48
   1 -16  -3    4.68    0.31
  -1 -16   3    5.49    0.37
   1 -16  -3    4.98    0.32
  -1 -16   3    5.05    0.38
   2  16  -3   14.26    0.95
   2  16  -3   11.91    0.91
  -2 -16   3   13.65    0.78
  -2 -16   3   12.45    0.77
   2 -16  -3   13.91    0.83
   3  16  -3   11.35    0.86
  -3 -16   3   11.09    0.73
  -3 -16   3   10.40    0.69
   3 -16  -3   11.61    0.72
   4  16  -3    7.84    0.67
   4 -16  -3    5.85    0.49
   3  17   3    0.41    0.20
   3 -17   3    0.64    0.10
   3 -17   3    0.62    0.10
   3 -17   3    0.48    0.22
  -3 -17  -3    0.59    0.19
   2  17   3   36.23    2.32
   2  17   3   32.92    2.30
   2 -17   3   37.00    1.86
   2 -17   3   36.30    1.86
  -2 -17  -3   35.55    1.91
  -2 -17  -3   34.66    1.91
   2 -17   3   35.41    2.05
  -1 -17  -3    8.03    0.50
  -1 -17  -3    7.49    0.50
   1 -17   3    7.86    0.47
   0 -17  -3   16.54    0.91
   0 -17   3   17.38    0.92
   0 -17  -3   16.24    0.91
   0 -17   3   16.15    0.92
   1 -17  -3    0.06    0.09
   1 -17  -3    0.11    0.10
  -1 -17   3    0.03    0.12
  -1 -17   3   -0.07    0.13
   2  17  -3    3.01    0.33
   2  17  -3    3.14    0.38
  -2 -17   3    3.63    0.35
   2 -17  -3    3.86    0.22
  -2 -17   3    3.41    0.34
   2 -17  -3    3.66    0.36
   3  17  -3   31.28    2.06
  -3 -17   3   29.63    1.68
   3 -17  -3   31.05    1.76
   2 -18   3    0.16    0.10
   2 -18   3    0.20    0.11
  -2 -18  -3    0.10    0.16
  -2 -18  -3    0.04    0.16
   2 -18   3    0.09    0.21
   1 -18   3    2.96    0.28
  -1 -18  -3    3.08    0.32
   1 -18   3    2.94    0.27
  -1 -18  -3    3.30    0.32
   0 -18  -3   15.75    0.85
   0 -18   3   15.39    0.85
   0 -18  -3   14.28    0.84
   0 -18   3   14.62    0.85
  -1 -18   3    0.27    0.16
   1 -18  -3    0.48    0.12
   1 -18  -3    0.36    0.11
  -1 -18   3    0.35    0.15
   2  18  -3    3.48    0.36
   2  18  -3    2.75    0.31
  -2 -18   3    3.51    0.36
   2 -18  -3    3.49    0.37
   2 -18  -3    3.74    0.24
   2 -18  -3    3.55    0.24
  -2 -18   3    3.38    0.35
   7   0   4    9.13    0.68
  -7   0  -4   11.39    0.83
  -6   0  -4    6.28    0.54
   6   0   4    6.77    0.46
   6   0   4    5.83    0.58
   6   0   4    6.94    0.45
  -6   0  -4    7.22    0.58
   5   0   4    7.61    0.46
  -5   0  -4    7.81    0.58
  -5   0  -4    7.18    0.43
   5   0   4    7.73    0.46
  -5   0  -4    6.56    0.50
   5   0   4    6.66    0.58
   4   0   4  186.68    9.51
   4   0   4  183.74   11.82
  -4   0  -4  175.83    9.50
  -4   0  -4  195.29   11.82
  -4   0  -4  175.73   10.02
   4   0   4  192.35    9.51
  -4   0  -4  184.56    9.51
   3   0   4    4.11    0.24
  -3   0  -4    3.74    0.26
  -3   0  -4    4.12    0.23
   3   0   4    2.91    0.28
  -3   0  -4    3.21    0.29
  -3   0  -4    2.72    0.28
   3   0   4    2.82    0.29
   3   0   4    4.12    0.24
  -3   0  -4    3.78    0.22
   2   0   4  433.46   29.34
  -2   0  -4  458.61   24.94
  -2   0  -4  457.75   29.41
  -2   0  -4  477.40   23.64
   2   0   4  474.08   23.67
   2   0   4  465.04   23.69
   2   0   4  450.08   29.37
  -2   0  -4  441.08   29.38
  -2   0  -4  474.21   23.65
   1   0   4   96.76    5.93
  -1   0  -4   86.04    4.76
   1   0   4   91.24    5.89
  -1   0  -4   90.62    5.89
  -1   0  -4   92.04    4.98
   1   0   4   93.69    4.74
   1   0   4   95.86    4.77
  -1   0  -4   88.81    5.89
  -1   0  -4   91.44    4.74
   0   0   4  146.67    9.17
   0   0  -4  134.47    7.33
   0   0   4  138.74    7.36
   0   0  -4  149.49    9.15
   0   0   4  140.21    7.70
   0   0   4  146.73    9.15
   0   0  -4  138.19    9.15
  -1   0   4  384.73   19.40
   1   0  -4  359.20   24.12
  -1   0   4  380.59   19.40
   1   0  -4  370.48   24.10
   1   0  -4  384.61   19.41
  -1   0   4  380.52   24.12
   2   0  -4  420.37   20.88
   2   0  -4  386.28   25.89
   2   0  -4  386.97   25.91
  -2   0   4  406.09   25.96
  -2   0   4  412.60   20.87
  -2   0   4  410.12   20.86
   2   0  -4  412.55   20.87
   3   0  -4   32.08    1.63
  -3   0   4   31.44    1.62
   3   0  -4   29.32    2.02
   3   0  -4   30.17    1.63
  -3   0   4   31.04    1.62
  -3   0   4   31.76    2.03
   3   0  -4   31.74    2.03
  -4   0   4    8.00    0.46
  -4   0   4    7.67    0.60
  -4   0   4    8.07    0.46
   4   0  -4    8.58    0.48
   4   0  -4    8.93    0.48
  -5   0   4   73.92    5.07
  -5   0   4   79.22    5.08
   5   0  -4   77.81    4.09
   5   0  -4   81.93    5.09
   5   0  -4   80.86    4.09
  -6   0   4   -0.18    0.14
   6   0  -4   -0.22    0.19
   6   0  -4   -0.08    0.14
   6   0  -4   -0.31    0.13
  -6   0   4   -0.23    0.18
  -7   0   4    1.05    0.25
   7   0  -4    0.85    0.18
  -7   1  -4    7.37    0.61
   7  -1   4    5.75    0.48
  -7  -1  -4    6.97    0.64
   6   1   4   17.17    1.00
   6   1   4   18.02    1.00
   6   1   4   18.12    1.26
  -6   1  -4   16.16    1.22
  -6   1  -4   18.76    1.24
  -6  -1  -4   19.93    1.26
   6  -1   4   16.69    1.24
   6  -1   4   16.60    0.99
   6  -1   4   17.89    1.00
  -5   1  -4   66.68    3.75
   5   1   4   70.39    3.55
   5   1   4   68.56    3.55
   5   1   4   69.26    4.42
  -5   1  -4   72.77    4.41
  -5   1  -4   65.40    4.40
  -5  -1  -4   73.16    4.42
   5  -1   4   66.91    3.55
   5  -1   4   68.43    4.41
  -5  -1  -4   62.66    3.53
   5  -1   4   70.70    3.55
  -5  -1  -4   62.84    4.41
   4   1   4    0.19    0.11
   4   1   4    0.18    0.08
  -4   1  -4    0.38    0.07
  -4   1  -4    0.41    0.12
  -4   1  -4    0.34    0.07
  -4   1  -4    0.06    0.10
  -4   1  -4    0.46    0.13
   4   1   4    0.29    0.10
   4   1   4    0.40    0.14
  -4  -1  -4    0.26    0.08
   4  -1   4    0.34    0.09
   4  -1   4    0.20    0.05
   4  -1   4    0.48    0.13
  -4  -1  -4    0.22    0.14
  -4  -1  -4    0.16    0.12
  -4  -1  -4    0.19    0.09
   3   1   4    0.28    0.08
  -3   1  -4    0.13    0.08
   3   1   4    0.25    0.09
  -3   1  -4    0.21    0.06
   3   1   4    0.23    0.07
  -3   1  -4    0.22    0.09
  -3   1  -4    0.22    0.06
  -3   1  -4    0.07    0.05
  -3  -1  -4    0.18    0.06
   3  -1   4    0.20    0.07
  -3  -1  -4    0.27    0.09
   3  -1   4    0.20    0.06
  -3  -1  -4    0.38    0.10
   3  -1   4    0.13    0.08
  -3  -1  -4    0.31    0.07
   3  -1   4    0.26    0.10
   2   1   4  308.82   15.47
  -2   1  -4  305.72   19.28
   2   1   4  288.61   19.23
  -2   1  -4  294.99   16.36
  -2   1  -4  302.98   15.47
  -2   1  -4  303.91   15.51
   2   1   4  305.78   15.51
   2   1   4  285.75   19.15
  -2  -1  -4  297.45   19.29
   2  -1   4  304.79   15.53
  -2  -1  -4  286.03   19.23
  -2  -1  -4  310.28   15.50
   2  -1   4  309.24   15.50
   2  -1   4  292.51   19.26
  -2  -1  -4  302.42   15.51
   2  -1   4  307.37   19.21
   1   1   4   32.23    1.57
  -1   1  -4   31.48    1.57
   1   1   4   29.41    1.95
  -1   1  -4   31.00    1.57
   1   1   4   28.80    1.95
  -1   1  -4   31.45    1.66
  -1   1  -4   27.37    1.95
   1  -1   4   31.06    1.57
  -1  -1  -4   32.44    1.57
  -1  -1  -4   29.31    1.95
  -1  -1  -4   29.50    1.95
   1  -1   4   31.64    1.57
   1  -1   4   26.75    1.95
   1  -1   4   32.04    1.66
   1  -1   4   29.35    1.95
   0   1   4  191.14    9.80
   0   1   4  199.47   10.28
   0   1   4  195.40    9.82
   0   1  -4  194.33   12.21
   0   1  -4  190.59   12.20
   0   1   4  186.81   12.17
   0   1  -4  201.23    9.82
   0  -1  -4  195.04   10.28
   0  -1  -4  192.26    9.80
   0  -1   4  185.33   12.20
   0  -1   4  191.17    9.81
   0  -1  -4  188.31   12.20
   0  -1  -4  195.57    9.81
   0  -1  -4  176.98   12.15
   0  -1   4  170.10    9.79
   0  -1   4  183.17   12.17
  -2   1   4  402.31   20.10
   2   1  -4  382.98   24.96
   2   1  -4  367.87   24.96
  -2   1   4  406.62   20.09
  -2   1   4  374.37   24.97
  -2   1   4  395.76   25.01
   2   1  -4  390.57   20.11
   2   1  -4  393.44   20.12
  -2  -1   4  415.75   20.16
   2  -1  -4  390.23   20.11
  -2  -1   4  397.88   20.14
  -2  -1   4  386.55   25.02
   2  -1  -4  386.23   25.01
   2  -1  -4  371.05   24.99
  -2  -1   4  387.51   24.98
   2  -1  -4  398.56   20.11
  -3   1   4  106.79    5.20
  -3   1   4   95.83    6.47
   3   1  -4  104.37    5.21
   3   1  -4   95.61    6.47
  -3   1   4  104.67    6.47
   3   1  -4   95.37    6.48
   3   1  -4  105.61    5.21
  -3   1   4  101.69    5.20
  -3  -1   4  105.03    5.21
   3  -1  -4   92.27    6.47
  -3  -1   4   93.23    6.47
  -3  -1   4  105.14    5.21
   3  -1  -4  107.54    5.21
  -3  -1   4  102.35    6.48
   3  -1  -4  105.24    5.21
   3  -1  -4   96.34    6.47
   4   1  -4   42.65    2.21
  -4   1   4   40.66    2.19
  -4   1   4   40.89    2.74
   4   1  -4   42.94    2.22
   4   1  -4   42.44    2.76
  -4   1   4   44.28    2.75
  -4  -1   4   44.92    2.76
   4  -1  -4   41.54    2.21
   4  -1  -4   41.91    2.75
  -4  -1   4   41.73    2.21
  -4  -1   4   40.87    2.21
   4  -1  -4   42.87    2.21
   5   1  -4   28.26    1.94
   5   1  -4   29.51    1.56
  -5   1   4   30.04    1.93
   5   1  -4   29.43    1.56
   5  -1  -4   30.87    1.55
  -5  -1   4   27.42    1.54
   5  -1  -4   26.95    1.93
   5  -1  -4   28.58    1.55
  -5  -1   4   30.98    1.94
   6   1  -4   -0.26    0.19
  -6   1   4   -0.34    0.17
   6   1  -4   -0.32    0.12
  -6   1   4   -0.03    0.14
   6   1  -4   -0.27    0.11
   6  -1  -4   -0.26    0.18
  -6  -1   4   -0.21    0.14
   6  -1  -4   -0.37    0.13
   6  -1  -4   -0.26    0.13
  -6  -1   4   -0.23    0.18
  -7   1   4    8.07    0.63
   7  -1  -4    6.09    0.50
  -7  -1   4    7.74    0.66
   7  -1  -4    6.43    0.50
  -7   2  -4    0.06    0.19
  -7  -2  -4   -0.04    0.23
   7  -2   4    0.22    0.16
   7  -2   4    0.12    0.15
  -6   2  -4   18.21    1.18
  -6   2  -4   15.74    1.16
   6   2   4   16.76    0.96
   6   2   4   16.43    0.95
   6   2   4   17.25    1.21
   6  -2   4   15.82    0.95
   6  -2   4   16.59    1.18
  -6  -2  -4   18.12    1.21
   6  -2   4   16.99    0.95
   5   2   4   20.65    1.11
   5   2   4   20.74    1.39
  -5   2  -4   21.87    1.37
  -5   2  -4   19.40    1.19
   5   2   4   20.41    1.11
  -5   2  -4   19.64    1.36
   5  -2   4   20.87    1.10
  -5  -2  -4   19.92    1.10
   5  -2   4   19.90    1.38
  -5  -2  -4   18.38    1.09
   5  -2   4   19.26    1.10
  -5  -2  -4   22.45    1.40
  -4   2  -4    1.80    0.19
   4   2   4    1.50    0.17
  -4   2  -4    1.34    0.12
   4   2   4    1.14    0.19
   4   2   4    1.62    0.16
   4   2   4    0.89    0.16
  -4   2  -4    1.32    0.19
  -4   2  -4    1.11    0.17
   4  -2   4    1.35    0.14
   4  -2   4    0.85    0.16
  -4  -2  -4    1.13    0.12
   4  -2   4    1.10    0.12
  -4  -2  -4    1.40    0.16
  -4  -2  -4    1.39    0.20
  -3   2  -4   31.54    1.87
   3   2   4   37.37    2.20
   3   2   4   34.05    1.77
  -3   2  -4   33.21    2.19
  -3   2  -4   37.53    2.19
   3   2   4   30.94    2.19
   3   2   4   30.98    1.76
  -3   2  -4   32.45    1.75
  -3   2  -4   32.27    1.75
  -3  -2  -4   33.51    2.20
   3  -2   4   34.33    1.76
   3  -2   4   33.28    2.19
  -3  -2  -4   32.84    1.76
   3  -2   4   32.39    1.76
  -3  -2  -4   32.63    1.76
   3  -2   4   38.35    2.20
  -3  -2  -4   35.17    2.20
  -2   2  -4   10.63    0.71
  -2   2  -4   10.42    0.56
   2   2   4   10.81    0.58
   2   2   4   12.02    0.73
  -2   2  -4   10.47    0.56
   2   2   4   10.54    0.72
  -2   2  -4    9.26    0.61
  -2   2  -4   11.05    0.71
   2  -2   4   10.42    0.57
  -2  -2  -4   10.50    0.58
  -2  -2  -4   10.72    0.72
   2  -2   4   10.53    0.71
   2  -2   4   10.23    0.71
   2  -2   4   10.06    0.57
   1   2   4    3.07    0.23
  -1   2  -4    2.63    0.17
   1   2   4    2.74    0.18
  -1   2  -4    2.43    0.20
  -1   2  -4    2.76    0.17
   1   2   4    2.73    0.18
   1   2   4    2.95    0.23
  -1   2  -4    2.66    0.22
  -1  -2  -4    2.75    0.18
  -1  -2  -4    2.59    0.23
   1  -2   4    2.53    0.20
   1  -2   4    2.63    0.17
  -1  -2  -4    2.88    0.23
   1  -2   4    2.60    0.22
   1  -2   4    2.56    0.22
   1  -2   4    2.57    0.18
  -1  -2  -4    2.53    0.18
   0   2   4   28.35    1.87
   0   2  -4   28.83    1.51
   0   2   4   27.52    1.50
   0   2  -4   28.89    1.51
   0   2  -4   32.45    1.88
   0   2   4   27.86    1.50
   0  -2  -4   29.38    1.50
   0  -2  -4   28.32    1.87
   0  -2   4   28.29    1.51
   0  -2   4   30.99    1.88
   0  -2  -4   30.43    1.87
   0  -2  -4   27.93    1.50
   0  -2   4   30.98    1.88
   0  -2   4   27.15    1.51
   1   2  -4  489.58   31.84
   1   2  -4  487.12   31.84
  -1   2   4  487.74   31.78
   1   2  -4  508.41   25.62
  -1   2   4  490.08   31.79
  -1  -2   4  481.43   31.84
   1  -2  -4  537.50   25.58
  -1  -2   4  499.37   31.83
   1  -2  -4  500.45   31.79
  -1  -2   4  535.48   25.65
   1  -2  -4  457.50   31.78
  -2   2   4  117.56    7.56
  -2   2   4  116.74    6.05
  -2   2   4  119.71    6.05
   2   2  -4  125.49    6.05
   2   2  -4  113.39    7.52
   2   2  -4  118.79    6.05
   2   2  -4  116.51    7.52
  -2   2   4  115.44    7.54
  -2  -2   4  116.28    7.52
  -2  -2   4  119.31    6.05
  -2  -2   4  120.88    6.05
   2  -2  -4  112.20    7.51
  -2  -2   4  111.14    7.52
   2  -2  -4  120.27    6.04
   2  -2  -4  122.50    6.06
   2  -2  -4  116.11    7.51
  -3   2   4    3.28    0.27
   3   2  -4    3.29    0.30
   3   2  -4    3.54    0.24
   3   2  -4    3.28    0.31
  -3   2   4    3.43    0.28
  -3   2   4    3.32    0.19
   3   2  -4    3.55    0.24
  -3   2   4    3.36    0.19
   3  -2  -4    3.53    0.29
  -3  -2   4    3.22    0.23
   3  -2  -4    3.55    0.22
  -3  -2   4    3.65    0.31
  -3  -2   4    3.22    0.29
   3  -2  -4    3.03    0.27
   3  -2  -4    3.75    0.23
  -3  -2   4    3.74    0.23
  -4   2   4   -0.06    0.12
   4   2  -4    0.10    0.14
   4   2  -4    0.07    0.09
  -4   2   4    0.25    0.11
   4   2  -4   -0.08    0.11
   4   2  -4   -0.01    0.09
   4  -2  -4    0.03    0.12
  -4  -2   4    0.17    0.08
  -4  -2   4    0.07    0.08
   4  -2  -4    0.03    0.08
   4  -2  -4    0.04    0.08
  -4  -2   4    0.03    0.14
  -4  -2   4    0.03    0.11
   5   2  -4    7.48    0.48
  -5   2   4    7.38    0.56
  -5   2   4    8.36    0.58
   5   2  -4    7.72    0.62
   5   2  -4    7.30    0.47
   5  -2  -4    7.20    0.58
  -5  -2   4    8.36    0.62
   5  -2  -4    7.93    0.47
   5  -2  -4    7.84    0.47
  -5  -2   4    7.20    0.45
  -5  -2   4    6.21    0.57
  -6   2   4    2.33    0.28
   6   2  -4    2.25    0.32
  -6   2   4    1.52    0.24
   6   2  -4    2.18    0.23
  -6   2   4    2.27    0.33
   6   2  -4    1.88    0.21
   6  -2  -4    2.14    0.22
   6  -2  -4    1.51    0.26
   6  -2  -4    2.09    0.22
  -6  -2   4    2.47    0.32
  -7   2   4    6.49    0.56
  -7  -2   4    6.26    0.60
   7  -2  -4    5.72    0.45
   7  -2  -4    5.48    0.46
   7   3   4    5.01    0.57
  -7   3  -4    4.54    0.46
  -7  -3  -4    5.23    0.56
   7  -3   4    3.65    0.39
   7  -3   4    3.87    0.39
   6   3   4    6.94    0.49
  -6   3  -4    7.12    0.57
   6   3   4    6.80    0.49
   6   3   4    7.98    0.65
  -6   3  -4    7.68    0.59
   6  -3   4    6.84    0.48
   6  -3   4    7.31    0.61
   6  -3   4    7.15    0.48
  -6  -3  -4    8.00    0.64
  -5   3  -4    0.27    0.13
   5   3   4    0.35    0.12
   5   3   4    0.24    0.19
  -5   3  -4    0.25    0.15
  -5   3  -4    0.04    0.13
   5   3   4    0.26    0.13
   5  -3   4    0.21    0.15
  -5  -3  -4    0.20    0.11
   5  -3   4    0.13    0.06
  -5  -3  -4    0.32    0.18
  -5  -3  -4    0.09    0.10
  -5  -3  -4    0.22    0.14
   5  -3   4    0.21    0.11
  -4   3  -4   34.97    2.09
   4   3   4   39.05    1.98
  -4   3  -4   41.06    2.45
   4   3   4   36.20    2.46
  -4   3  -4   38.55    2.44
   4   3   4   33.94    2.46
   4   3   4   37.97    1.98
  -4  -3  -4   38.67    2.47
  -4  -3  -4   33.12    2.45
   4  -3   4   38.20    1.97
  -4  -3  -4   39.71    1.98
   4  -3   4   40.11    1.97
   4  -3   4   37.12    2.45
  -4  -3  -4   37.60    1.98
   3   3   4    2.84    0.30
  -3   3  -4    3.37    0.27
  -3   3  -4    3.23    0.26
   3   3   4    3.37    0.23
  -3   3  -4    3.50    0.18
  -3   3  -4    3.33    0.26
  -3   3  -4    3.38    0.18
   3   3   4    3.04    0.28
   3  -3   4    3.66    0.22
  -3  -3  -4    2.94    0.22
   3  -3   4    2.73    0.27
   3  -3   4    2.76    0.26
   3  -3   4    3.48    0.22
  -3  -3  -4    2.70    0.28
  -3  -3  -4    3.08    0.30
  -3  -3  -4    3.21    0.22
  -2   3  -4  150.90    7.61
  -2   3  -4  152.01    9.50
  -2   3  -4  142.58    8.00
   2   3   4  144.73    9.45
   2   3   4  154.46    9.46
   2   3   4  152.09    7.61
  -2   3  -4  146.50    7.62
  -2   3  -4  143.57    9.51
   2  -3   4  145.26    8.01
   2  -3   4  151.60    9.45
   2  -3   4  142.28    9.44
  -2  -3  -4  146.26    9.45
  -2  -3  -4  152.24    9.46
   2  -3   4  147.69    7.60
  -2  -3  -4  140.96    7.60
   2  -3   4  153.86    7.61
  -2  -3  -4  148.23    7.61
  -1   3  -4   19.93    1.28
  -1   3  -4   21.88    1.28
   1   3   4   19.28    1.29
   1   3   4   18.23    1.03
  -1   3  -4   19.75    1.02
  -1   3  -4   19.41    1.02
   1   3   4   19.48    1.03
  -1  -3  -4   19.49    1.04
   1  -3   4   20.62    1.28
  -1  -3  -4   18.90    1.04
   1  -3   4   21.55    1.29
   1  -3   4   19.15    1.03
   1  -3   4   18.63    1.10
  -1  -3  -4   20.76    1.29
   1  -3   4   19.51    1.03
   0   3  -4  222.56   11.50
   0   3   4  220.79   14.30
   0   3   4  221.08   14.29
   0   3  -4  221.08   11.50
   0   3   4  221.47   11.49
   0   3   4  221.78   11.49
   0   3  -4  223.53   14.34
   0  -3   4  224.04   11.53
   0  -3  -4  224.71   14.30
   0  -3   4  230.39   11.52
   0  -3  -4  221.12   14.31
   0  -3   4  231.13   14.31
   0  -3  -4  227.61   11.51
   0  -3   4  215.30   14.33
   0  -3  -4  220.39   11.51
  -1   3   4  171.90   10.68
   1   3  -4  158.58   10.70
   1   3  -4  158.42   10.63
  -1   3   4  156.60   10.66
   1   3  -4  172.51    8.63
   1   3  -4  171.96    8.65
   1  -3  -4  184.08    8.59
  -1  -3   4  168.54   10.70
   1  -3  -4  155.12   10.65
  -1  -3   4  150.84   10.63
   1  -3  -4  175.93    8.58
  -1  -3   4  177.52    8.59
  -1  -3   4  177.70    8.63
   1  -3  -4  154.15   10.67
   2   3  -4    0.99    0.12
   2   3  -4    0.69    0.12
  -2   3   4    0.66    0.10
  -2   3   4    1.00    0.11
   2  -3  -4    0.59    0.09
   2  -3  -4    0.95    0.11
  -2  -3   4    0.69    0.11
  -2  -3   4    1.18    0.14
  -3   3   4  211.30   13.60
   3   3  -4  221.49   13.56
   3   3  -4  191.07   13.55
   3   3  -4  214.49   10.93
  -3   3   4  215.59   11.53
   3   3  -4  214.98   10.91
  -3   3   4  217.68   13.58
  -3  -3   4  216.16   10.91
   3  -3  -4  220.13   13.56
  -3  -3   4  208.49   10.90
   3  -3  -4  210.05   10.96
   3  -3  -4  202.72   13.54
  -3  -3   4  207.34   13.55
   3  -3  -4  215.90   10.95
  -3  -3   4  216.20   13.56
  -4   3   4   21.94    1.21
   4   3  -4   22.23    1.45
   4   3  -4   20.54    1.15
   4   3  -4   21.59    1.16
  -4   3   4   21.46    1.41
  -4   3   4   22.52    1.41
   4   3  -4   19.12    1.43
  -4  -3   4   20.34    1.43
  -4  -3   4   20.93    1.15
  -4  -3   4   22.92    1.45
   4  -3  -4   22.69    1.14
  -4  -3   4   22.00    1.15
   4  -3  -4   20.70    1.14
   4  -3  -4   21.41    1.42
   5   3  -4   11.46    0.87
   5   3  -4   11.93    0.69
  -5   3   4   11.68    0.82
   5   3  -4   11.97    0.69
  -5   3   4   12.38    0.83
  -5   3   4   12.27    0.73
   5  -3  -4   13.32    0.68
  -5  -3   4   11.27    0.67
  -5  -3   4   12.28    0.87
  -5  -3   4   10.07    0.84
   5  -3  -4   11.90    0.67
  -5  -3   4   11.98    0.68
   5  -3  -4   11.47    0.84
   6   3  -4    0.59    0.15
   6   3  -4    0.79    0.17
  -6   3   4    0.78    0.18
  -6   3   4    1.26    0.18
   6   3  -4    0.99    0.25
  -6   3   4    0.94    0.19
  -6  -3   4    0.75    0.25
   6  -3  -4    0.83    0.16
   6  -3  -4    1.18    0.22
   6  -3  -4    0.80    0.16
  -7   3   4    0.79    0.21
   7  -3  -4    0.59    0.18
  -7  -3   4    0.60    0.26
   7  -3  -4    0.78    0.19
   7   4   4   25.07    1.64
  -7   4  -4   23.58    1.56
   7  -4   4   19.81    1.27
  -7  -4  -4   24.48    1.63
   7  -4   4   21.80    1.27
   6   4   4   -0.01    0.12
  -6   4  -4    0.09    0.13
  -6   4  -4   -0.02    0.15
   6   4   4    0.19    0.23
   6   4   4    0.09    0.13
   6  -4   4    0.08    0.13
   6  -4   4   -0.09    0.12
  -6  -4  -4    0.09    0.21
   5   4   4    1.18    0.17
   5   4   4    1.89    0.20
  -5   4  -4    1.91    0.25
   5   4   4    1.94    0.28
  -5   4  -4    1.97    0.23
  -5   4  -4    1.36    0.21
  -5  -4  -4    1.50    0.22
   5  -4   4    2.04    0.26
  -5  -4  -4    1.72    0.19
  -5  -4  -4    2.04    0.20
   5  -4   4    1.81    0.21
   5  -4   4    1.97    0.21
  -5  -4  -4    2.23    0.29
  -4   4  -4  106.73    6.67
   4   4   4  107.72    5.39
   4   4   4   91.72    6.69
   4   4   4  108.95    6.70
  -4   4  -4  106.21    6.67
  -4   4  -4  102.36    5.68
   4  -4   4  104.86    5.37
  -4  -4  -4  103.92    5.38
  -4  -4  -4  108.22    6.70
  -4  -4  -4   96.39    6.69
   4  -4   4  105.24    6.68
  -4  -4  -4  100.59    5.38
   4  -4   4  110.61    5.37
   3   4   4   38.57    2.42
  -3   4  -4   37.15    2.39
  -3   4  -4   37.89    2.39
  -3   4  -4   34.53    2.05
   3   4   4   37.40    1.94
   3   4   4   35.42    2.41
  -3  -4  -4   37.93    1.94
  -3  -4  -4   36.74    2.41
   3  -4   4   36.31    1.92
   3  -4   4   37.72    2.05
  -3  -4  -4   35.53    2.41
   3  -4   4   38.08    1.92
   3  -4   4   37.65    2.40
  -2   4  -4  126.11    7.18
   2   4   4  136.96    6.82
  -2   4  -4  132.94    8.49
   2   4   4  139.82    8.48
   2   4   4  128.11    6.82
  -2   4  -4  136.42    8.52
   2   4   4  126.39    8.48
  -2  -4  -4  131.04    6.82
   2  -4   4  134.89    8.47
   2  -4   4  133.51    6.84
  -2  -4  -4  132.78    6.82
  -2  -4  -4  135.98    8.48
   2  -4   4  136.68    7.19
  -2  -4  -4  127.71    8.48
   2  -4   4  129.17    8.47
   2  -4   4  133.15    6.84
   1   4   4    8.88    0.50
  -1   4  -4    9.87    0.62
   1   4   4    8.90    0.50
  -1   4  -4   10.26    0.63
   1  -4   4    8.96    0.50
   1  -4   4    9.00    0.50
   1  -4   4    9.63    0.63
   1  -4   4    8.03    0.55
  -1  -4  -4   10.63    0.64
  -1  -4  -4    8.97    0.51
  -1  -4  -4    8.82    0.51
   1  -4   4    9.53    0.63
  -1  -4  -4   10.08    0.64
   0   4  -4   97.95    4.92
   0   4   4   95.80    4.92
   0   4  -4   94.68    4.93
   0   4  -4   88.77    6.10
   0   4  -4   98.70    6.11
   0   4   4   95.89    4.92
   0   4   4   96.33    6.15
   0   4   4  101.76    6.13
   0  -4  -4   91.94    6.12
   0  -4   4   98.64    4.92
   0  -4   4   95.78    4.91
   0  -4  -4   93.42    6.10
   0  -4   4   89.50    6.11
   0  -4   4   97.89    6.11
   0  -4  -4   95.69    4.94
   0  -4  -4   96.83    4.94
   1   4  -4    2.09    0.18
   1   4  -4    1.93    0.14
   1   4  -4    1.84    0.14
   1  -4  -4    1.79    0.11
   1  -4  -4    1.84    0.11
  -1  -4   4    1.99    0.15
   1  -4  -4    2.10    0.16
  -1  -4   4    2.27    0.19
   1  -4  -4    1.76    0.13
   2   4  -4   26.35    1.79
  -2   4   4   28.14    1.49
  -2   4   4   26.61    1.75
  -2   4   4   28.77    1.75
   2   4  -4   25.87    1.78
   2   4  -4   29.14    1.44
   2  -4  -4   25.97    1.76
   2  -4  -4   28.22    1.41
   2  -4  -4   28.50    1.41
  -2  -4   4   27.05    1.79
  -2  -4   4   25.08    1.78
  -2  -4   4   28.70    1.44
  -2  -4   4   28.33    1.44
   2  -4  -4   26.00    1.76
   3   4  -4    1.65    0.16
   3   4  -4    1.24    0.17
  -3   4   4    0.93    0.13
  -3   4   4    1.43    0.14
   3   4  -4    1.05    0.15
  -3  -4   4    1.05    0.16
   3  -4  -4    1.07    0.16
  -3  -4   4    1.03    0.16
  -3  -4   4    1.64    0.15
  -3  -4   4    1.18    0.13
  -4   4   4    0.91    0.14
   4   4  -4    0.75    0.13
   4   4  -4    1.17    0.20
  -4   4   4    1.22    0.15
   4   4  -4    0.75    0.16
   4   4  -4    0.57    0.11
  -4   4   4    1.00    0.13
  -4  -4   4    1.03    0.13
   4  -4  -4    1.22    0.15
  -4  -4   4    0.97    0.18
  -4  -4   4    1.20    0.18
   4  -4  -4    0.94    0.11
   4  -4  -4    1.07    0.11
  -4  -4   4    0.85    0.12
  -5   4   4   54.67    3.09
  -5   4   4   59.04    3.62
  -5   4   4   60.37    3.62
   5   4  -4   58.59    3.67
   5   4  -4   55.62    2.94
   5   4  -4   52.19    2.94
   5  -4  -4   61.24    2.93
  -5  -4   4   51.88    2.93
   5  -4  -4   54.43    2.92
  -5  -4   4   53.85    2.93
  -5  -4   4   59.67    3.67
   5  -4  -4   57.82    3.64
  -5  -4   4   49.92    3.65
  -6   4   4    7.65    0.57
  -6   4   4    9.15    0.64
   6   4  -4    8.00    0.55
   6   4  -4    8.62    0.72
   6   4  -4    8.03    0.55
   6  -4  -4    8.94    0.54
   6  -4  -4    8.60    0.53
  -6  -4   4    8.76    0.72
  -7   4   4   14.85    1.10
   7   4  -4   16.65    1.21
  -7   4   4   16.84    1.12
   7  -4  -4   15.10    0.93
  -7  -4   4   17.39    1.22
   7  -4  -4   15.98    0.93
  -7   5  -4    9.85    0.72
  -7   5  -4    9.30    0.71
   7   5   4    8.89    0.84
   7  -5   4   10.14    0.62
  -7  -5  -4    9.94    0.85
   7  -5   4    9.32    0.62
  -6   5  -4    5.84    0.46
   6   5   4    6.00    0.60
  -6   5  -4    5.33    0.45
   6  -5   4    5.32    0.40
   6  -5   4    5.49    0.40
  -6  -5  -4    5.58    0.57
   5   5   4   32.98    2.00
   5   5   4   24.90    1.97
   5   5   4   29.62    1.59
  -5   5  -4   32.17    1.94
  -5   5  -4   30.59    1.94
  -5   5  -4   27.58    1.69
   5  -5   4   30.55    1.96
  -5  -5  -4   27.14    1.58
   5  -5   4   29.59    1.57
  -5  -5  -4   26.79    1.97
  -5  -5  -4   29.04    1.59
  -5  -5  -4   32.71    2.00
   5  -5   4   31.27    1.57
  -4   5  -4    0.67    0.12
   4   5   4    0.67    0.18
  -4   5  -4    0.81    0.12
  -4   5  -4    0.58    0.14
   4   5   4    0.49    0.11
   4   5   4    0.50    0.14
   4   5   4    0.65    0.12
  -4  -5  -4    0.54    0.16
  -4  -5  -4    0.40    0.14
   4  -5   4    0.66    0.10
  -4  -5  -4    0.40    0.09
  -4  -5  -4    0.62    0.12
   4  -5   4    0.59    0.10
   4  -5   4    0.55    0.13
  -3   5  -4   41.98    2.59
   3   5   4   40.86    2.63
  -3   5  -4   41.05    2.59
   3   5   4   36.11    2.62
   3   5   4   41.12    2.11
   3   5   4   40.39    2.11
  -3   5  -4   38.52    2.23
   3  -5   4   43.01    2.09
   3  -5   4   39.61    2.09
  -3  -5  -4   41.05    2.11
  -3  -5  -4   41.59    2.63
  -3  -5  -4   36.82    2.62
   3  -5   4   42.03    2.23
  -3  -5  -4   40.70    2.11
   3  -5   4   39.07    2.60
  -2   5  -4  467.83   28.57
   2   5   4  418.40   28.62
  -2   5  -4  447.83   28.58
   2   5   4  458.46   23.09
   2   5   4  456.26   28.66
   2   5   4  440.26   23.06
  -2  -5  -4  456.26   23.05
   2  -5   4  441.39   28.60
  -2  -5  -4  414.91   28.61
   2  -5   4  431.82   28.60
   2  -5   4  453.69   23.02
   2  -5   4  452.49   24.34
  -2  -5  -4  452.11   23.07
   2  -5   4  472.73   23.00
  -2  -5  -4  444.57   28.70
   1   5   4  160.04    8.21
  -1   5  -4  163.65   10.18
   1   5   4  158.58    8.21
  -1   5  -4  158.06   10.17
   1   5   4  149.37   10.18
  -1  -5  -4  167.99    8.18
  -1  -5  -4  142.77   10.14
   1  -5   4  148.49   10.17
   1  -5   4  165.52    8.19
  -1  -5  -4  166.21    8.16
   1  -5   4  166.39    8.20
   1  -5   4  157.57   10.14
  -1  -5  -4  160.06   10.16
   0   5   4  128.33    8.69
   0   5   4  132.90    8.69
   0   5  -4  138.65    6.98
   0   5  -4  136.48    8.68
   0   5  -4  135.72    8.66
   0   5  -4  140.10    6.99
   0  -5  -4  138.51    7.01
   0  -5  -4  138.89    6.99
   0  -5   4  138.97    7.01
   0  -5  -4  138.47    8.71
   0  -5   4  134.92    7.00
   0  -5   4  135.29    8.69
   0  -5   4  127.19    8.66
   1   5  -4   73.80    4.78
   1   5  -4   79.04    3.84
   1   5  -4   75.52    3.84
  -1  -5   4   67.42    4.78
  -1  -5   4   80.10    3.85
   1  -5  -4   72.50    4.76
   1  -5  -4   73.39    4.76
  -1  -5   4   73.38    3.84
  -1  -5   4   74.53    4.78
   2   5  -4   42.24    2.13
   2   5  -4   38.09    2.65
   2   5  -4   43.31    2.65
   2  -5  -4   38.39    2.62
  -2  -5   4   39.81    2.65
  -2  -5   4   41.75    2.65
  -2  -5   4   41.41    2.13
   2  -5  -4   42.55    2.62
  -2  -5   4   40.70    2.13
   3   5  -4  186.87    9.84
  -3   5   4  191.86   10.34
   3   5  -4  202.81    9.84
   3   5  -4  187.29   12.23
   3   5  -4  175.53   12.23
  -3  -5   4  173.74   12.23
   3  -5  -4  205.36    9.85
  -3  -5   4  198.45   12.24
  -3  -5   4  197.21    9.84
   3  -5  -4  198.21    9.84
   3  -5  -4  187.92   12.21
  -4   5   4   63.90    3.93
   4   5  -4   54.28    3.97
  -4   5   4   61.31    3.36
   4   5  -4   61.93    3.20
  -4   5   4   60.59    3.92
   4   5  -4   62.19    3.98
  -4  -5   4   64.33    3.99
   4  -5  -4   63.04    3.17
   4  -5  -4   61.63    3.95
  -4  -5   4   60.07    3.20
  -4  -5   4   62.67    3.20
  -4  -5   4   54.81    3.97
   4  -5  -4   66.38    3.18
  -5   5   4    0.18    0.10
   5   5  -4    0.09    0.12
  -5   5   4    0.22    0.09
   5   5  -4    0.17    0.18
  -5   5   4   -0.03    0.12
   5   5  -4    0.00    0.10
  -5  -5   4    0.20    0.11
  -5  -5   4    0.13    0.14
   5  -5  -4    0.06    0.10
  -5  -5   4    0.09    0.10
   5  -5  -4    0.23    0.14
  -5  -5   4    0.02    0.17
   5  -5  -4    0.02    0.10
  -6   5   4    3.86    0.38
   6   5  -4    5.39    0.54
  -6   5   4    4.76    0.38
  -6   5   4    5.07    0.39
  -6  -5   4    5.33    0.53
   6  -5  -4    4.52    0.36
   6  -5  -4    4.49    0.35
  -7   5   4   10.63    0.78
   7   5  -4   12.06    0.94
  -7   5   4   11.98    0.80
   7  -5  -4   10.34    0.69
  -7  -5   4   11.68    0.95
   7  -5  -4   10.87    0.69
  -7   6  -4    0.96    0.17
  -7   6  -4    0.83    0.16
   7   6   4    1.04    0.31
   7  -6   4    0.83    0.19
  -7  -6  -4    0.73    0.30
   7  -6   4    0.78    0.18
  -6   6  -4    0.48    0.13
   6   6   4    0.16    0.26
  -6   6  -4    0.49    0.14
   6  -6   4    0.38    0.14
   6  -6   4    0.73    0.08
  -6  -6  -4    0.17    0.24
   5   6   4   10.79    0.65
  -5   6  -4   10.66    0.71
   5   6   4   10.84    0.84
   5   6   4    8.93    0.81
  -5   6  -4   11.15    0.75
  -5   6  -4   11.76    0.75
   5   6   4   10.72    0.65
  -5  -6  -4   11.80    0.66
  -5  -6  -4   11.68    0.85
   5  -6   4   11.36    0.63
  -5  -6  -4   10.36    0.65
   5  -6   4   12.12    0.64
   4   6   4   14.28    0.81
   4   6   4   12.69    1.01
  -4   6  -4   14.36    0.96
  -4   6  -4   15.43    0.96
   4   6   4   14.59    1.03
   4   6   4   14.87    0.82
  -4   6  -4   13.76    0.87
  -4  -6  -4   15.62    0.82
  -4  -6  -4   14.67    1.03
   4  -6   4   16.65    0.80
   4  -6   4   14.90    0.79
   4  -6   4   13.45    0.99
   3   6   4   71.25    3.82
   3   6   4   77.74    4.77
   3   6   4   67.07    4.75
  -3   6  -4   77.50    4.72
  -3   6  -4   75.66    4.72
   3   6   4   75.68    3.83
   3  -6   4   72.42    4.74
  -3  -6  -4   75.91    4.77
   3  -6   4   78.83    3.81
  -3  -6  -4   71.97    3.83
   3  -6   4   73.42    3.81
  -3  -6  -4   74.72    3.83
   3  -6   4   76.37    4.04
  -3  -6  -4   65.15    4.75
  -2   6  -4   22.43    1.40
   2   6   4   21.60    1.15
  -2   6  -4   22.69    1.40
   2   6   4   21.63    1.15
   2   6   4   22.24    1.44
  -2  -6  -4   20.64    1.44
   2  -6   4   20.72    1.42
   2  -6   4   22.89    1.13
  -2  -6  -4   21.86    1.44
  -2  -6  -4   21.39    1.15
  -2  -6  -4   21.53    1.15
   2  -6   4   21.54    1.42
   2  -6   4   21.27    1.13
   2  -6   4   22.00    1.23
  -1   6  -4   47.71    3.04
   1   6   4   45.17    3.06
   1   6   4   48.68    2.46
   1   6   4   50.12    2.46
  -1   6  -4   46.47    3.04
   1   6   4   45.63    3.06
  -1  -6  -4   49.86    2.46
  -1  -6  -4   48.96    2.46
   1  -6   4   50.12    2.45
   1  -6   4   42.15    3.05
  -1  -6  -4   46.54    3.06
   1  -6   4   47.53    3.05
   1  -6   4   49.37    2.45
   0   6  -4   36.57    1.88
   0   6   4   35.84    2.35
   0   6  -4   36.62    2.36
   0   6   4   35.55    2.35
   0   6  -4   36.67    2.35
   0   6  -4   37.53    1.88
   0  -6  -4   37.15    2.35
   0  -6   4   37.77    1.89
   0  -6   4   33.63    2.36
   0  -6  -4   37.83    1.89
   0  -6  -4   39.50    1.89
   0  -6  -4   32.53    2.35
   0  -6   4   37.77    1.90
   0  -6   4   37.27    2.36
   1   6  -4  185.84    9.27
   1   6  -4  184.56    9.31
   1   6  -4  176.35   11.55
  -1  -6   4  189.61    9.31
  -1  -6   4  163.36   11.48
   1  -6  -4  175.18   11.49
  -1  -6   4  179.93   11.48
   1  -6  -4  177.11   11.49
  -1  -6   4  186.97    9.29
   2   6  -4  122.53    5.98
   2   6  -4  115.56    5.98
   2   6  -4  115.53    7.44
   2   6  -4  109.04    7.43
   2  -6  -4  126.36    6.28
  -2  -6   4  121.28    5.98
  -2  -6   4  120.46    7.44
   2  -6  -4  107.35    7.40
  -2  -6   4  119.83    5.98
  -2  -6   4  104.80    7.43
   2  -6  -4  114.45    7.40
   3   6  -4    0.46    0.13
   3   6  -4    0.47    0.09
   3   6  -4    0.30    0.14
   3   6  -4    0.28    0.08
   3  -6  -4    0.43    0.09
   3  -6  -4    0.47    0.05
   3  -6  -4    0.46    0.06
  -3  -6   4    0.45    0.10
  -3  -6   4    0.43    0.09
  -3  -6   4    0.26    0.12
  -3  -6   4    0.40    0.13
   4   6  -4    8.95    0.73
   4   6  -4    9.89    0.58
  -4   6   4   10.06    0.60
   4   6  -4   10.49    0.59
   4   6  -4    9.80    0.75
  -4  -6   4    8.26    0.72
   4  -6  -4   10.66    0.55
   4  -6  -4    8.88    0.68
   4  -6  -4   10.92    0.55
  -4  -6   4   10.36    0.75
  -4  -6   4   10.57    0.58
   5   6  -4    4.00    0.44
  -5   6   4    3.85    0.31
   5   6  -4    3.03    0.38
   5   6  -4    3.56    0.30
   5  -6  -4    3.40    0.33
   5  -6  -4    3.93    0.27
  -5  -6   4    3.99    0.44
   5  -6  -4    4.13    0.27
  -5  -6   4    3.72    0.30
  -5  -6   4    2.57    0.36
  -5  -6   4    3.25    0.29
   6   6  -4   12.76    1.01
  -6   6   4   12.15    0.81
   6  -6  -4   13.44    0.75
   6  -6  -4   13.11    0.75
  -6  -6   4   13.48    1.00
   7   6  -4    2.80    0.42
   7  -6  -4    3.34    0.34
  -7  -6   4    3.51    0.44
   7  -6  -4    3.20    0.34
   7   7   4    0.30    0.28
   7  -7   4    0.06    0.15
  -7  -7  -4    0.44    0.28
   7  -7   4   -0.12    0.16
   6   7   4    0.22    0.25
   6  -7   4    0.36    0.13
   6  -7   4    0.40    0.13
  -6  -7  -4    0.31    0.24
   5   7   4    1.02    0.17
   5   7   4    0.85    0.20
  -5   7  -4    0.89    0.19
   5   7   4    1.09    0.16
   5   7   4    1.07    0.25
  -5  -7  -4    1.05    0.24
  -5  -7  -4    0.87    0.21
   5  -7   4    1.21    0.14
   5  -7   4    1.06    0.18
  -5  -7  -4    1.15    0.17
   5  -7   4    1.31    0.15
  -5  -7  -4    1.12    0.16
   4   7   4   11.40    0.65
   4   7   4   10.14    0.80
   4   7   4   11.52    0.84
   4   7   4   11.80    0.65
  -4  -7  -4   11.89    0.66
   4  -7   4   12.44    0.71
  -4  -7  -4   11.65    0.83
  -4  -7  -4    9.24    0.63
   4  -7   4   12.15    0.62
   4  -7   4   12.43    0.62
   4  -7   4    9.17    0.77
   3   7   4    1.34    0.13
   3   7   4    0.79    0.19
   3   7   4    1.06    0.12
   3   7   4    0.73    0.16
   3  -7   4    1.51    0.18
  -3  -7  -4    0.96    0.13
  -3  -7  -4    1.11    0.14
   3  -7   4    1.24    0.16
  -3  -7  -4    0.87    0.18
   3  -7   4    1.40    0.12
   3  -7   4    1.35    0.12
   2   7   4   48.46    2.96
   2   7   4   43.18    2.37
   2   7   4   44.61    2.37
   2  -7   4   46.78    2.52
   2  -7   4   48.50    2.35
   2  -7   4   43.72    2.93
  -2  -7  -4   46.77    2.96
  -2  -7  -4   45.48    2.38
   2  -7   4   44.83    2.35
  -2  -7  -4   46.02    2.38
  -2  -7  -4   43.57    2.95
   1   7   4   45.82    3.46
  -1   7  -4   51.60    3.44
   1   7   4   57.76    2.78
   1   7   4   48.62    3.46
  -1   7  -4   52.50    3.44
   1   7   4   54.08    2.78
   1  -7   4   53.90    3.46
  -1  -7  -4   52.14    3.47
   1  -7   4   57.66    2.78
  -1  -7  -4   59.14    2.79
  -1  -7  -4   55.77    2.79
   1  -7   4   57.78    2.78
   0   7   4  132.60    8.56
   0   7   4  139.18    8.55
   0   7  -4  134.49    8.59
   0   7  -4  134.55    8.53
   0  -7   4  123.30    8.53
   0  -7  -4  139.93    8.53
   0  -7  -4  127.42    6.87
   0  -7  -4  125.00    8.53
   0  -7   4  141.44    6.88
   0  -7  -4  138.00    6.86
   0  -7   4  134.37    8.53
   0  -7   4  132.77    6.90
   1   7  -4    1.20    0.11
   1   7  -4    1.35    0.18
   1   7  -4    1.16    0.11
   1   7  -4    1.21    0.16
  -1  -7   4    1.57    0.17
  -1  -7   4    1.07    0.12
   1  -7  -4    1.05    0.12
  -1  -7   4    1.29    0.17
   1  -7  -4    1.31    0.12
  -1  -7   4    1.14    0.13
   2   7  -4   18.38    1.20
   2   7  -4   18.27    0.95
   2   7  -4   15.38    1.19
   2   7  -4   18.36    0.95
  -2  -7   4   16.43    1.19
  -2  -7   4   18.33    0.96
   2  -7  -4   18.09    1.15
  -2  -7   4   18.64    1.20
  -2  -7   4   17.92    0.96
   2  -7  -4   18.77    0.99
   3   7  -4    9.60    0.76
   3   7  -4   10.41    0.61
   3   7  -4   12.28    0.78
   3   7  -4    9.56    0.60
  -3  -7   4   10.53    0.61
  -3  -7   4   10.77    0.76
  -3  -7   4   10.37    0.61
   3  -7  -4   11.86    0.72
  -3  -7   4   11.11    0.77
   4   7  -4    7.64    0.64
   4   7  -4    8.57    0.51
   4   7  -4    8.56    0.67
   4   7  -4    8.60    0.51
  -4  -7   4    6.96    0.64
  -4  -7   4    8.95    0.52
   4  -7  -4    9.26    0.47
   4  -7  -4    9.45    0.48
   4  -7  -4    8.27    0.60
  -4  -7   4    8.87    0.67
  -5   7   4    4.89    0.37
   5   7  -4    5.14    0.52
   5   7  -4    4.70    0.36
   5   7  -4    3.98    0.46
   5   7  -4    5.22    0.37
   5  -7  -4    5.63    0.34
   5  -7  -4    4.73    0.42
  -5  -7   4    5.46    0.52
  -5  -7   4    4.90    0.36
   5  -7  -4    5.98    0.34
  -5  -7   4    5.01    0.37
   6   7  -4   -0.09    0.24
  -6   7   4    0.06    0.14
   6  -7  -4    0.00    0.12
  -6  -7   4   -0.13    0.22
   6  -7  -4    0.07    0.12
   7   7  -4    1.07    0.33
  -7  -7   4    0.63    0.30
   7  -7  -4    0.69    0.18
   7  -7  -4    0.63    0.18
   6   8   4    4.04    0.54
   6  -8   4    4.43    0.34
   6  -8   4    3.93    0.34
  -6  -8  -4    4.34    0.53
   5   8   4    0.46    0.13
   5   8   4    0.91    0.25
   5  -8   4    0.79    0.16
  -5  -8  -4    0.48    0.13
   5  -8   4    0.67    0.12
   5  -8   4    0.72    0.12
  -5  -8  -4    0.63    0.23
   4   8   4   36.08    2.00
   4   8   4   34.51    2.00
   4   8   4   34.93    2.49
   4  -8   4   40.91    2.46
  -4  -8  -4   41.09    2.52
   4  -8   4   39.77    2.13
   4  -8   4   36.78    1.98
  -4  -8  -4   37.14    2.01
  -4  -8  -4   36.64    2.01
   4  -8   4   40.94    1.98
   3   8   4   17.22    1.16
   3   8   4   15.92    0.92
   3   8   4   16.27    0.92
   3  -8   4   18.31    0.90
   3  -8   4   17.45    1.00
   3  -8   4   16.42    1.12
  -3  -8  -4   16.91    0.93
  -3  -8  -4   17.84    1.17
   3  -8   4   16.77    0.90
  -3  -8  -4   17.33    0.94
   2   8   4    1.55    0.14
   2   8   4    1.63    0.14
   2   8   4    1.77    0.21
   2  -8   4    1.75    0.12
   2  -8   4    1.70    0.12
  -2  -8  -4    1.69    0.18
   2  -8   4    1.74    0.20
  -2  -8  -4    2.41    0.23
   2  -8   4    1.92    0.17
  -2  -8  -4    1.67    0.17
   1   8   4   12.93    0.91
   1   8   4   13.47    0.71
   1   8   4   12.13    0.91
  -1  -8  -4   13.13    0.73
   1  -8   4   14.64    0.72
  -1  -8  -4   13.73    0.92
   1  -8   4   13.46    0.90
   1  -8   4   14.35    0.72
  -1  -8  -4   14.60    0.74
   0   8  -4   46.62    2.95
   0   8   4   46.36    2.94
   0   8   4   47.18    2.95
   0   8  -4   46.77    2.96
   0  -8   4   46.32    2.38
   0  -8   4   45.21    2.96
   0  -8   4   44.00    2.38
   0  -8  -4   46.33    2.96
   0  -8  -4   44.39    2.37
   0  -8  -4   46.80    2.37
   1   8  -4  136.66    7.15
   1   8  -4  137.87    8.90
   1   8  -4  134.36    7.16
   1   8  -4  146.59    8.91
   1  -8  -4  133.92    8.88
  -1  -8   4  143.40    8.91
  -1  -8   4  141.34    7.17
  -1  -8   4  140.29    7.17
   2   8  -4   37.49    2.25
   2   8  -4   31.78    1.79
   2   8  -4   33.57    1.79
  -2  -8   4   35.48    2.25
   2  -8  -4   34.65    1.88
   2  -8  -4   36.13    2.20
  -2  -8   4   32.25    1.80
  -2  -8   4   33.03    1.80
   3   8  -4   12.95    0.74
   3   8  -4   12.07    0.92
   3   8  -4   14.60    0.95
   3  -8  -4   13.67    0.77
  -3  -8   4   14.08    0.94
  -3  -8   4   13.14    0.75
  -3  -8   4   13.29    0.75
   3  -8  -4   13.30    0.88
   4   8  -4    4.91    0.50
   4   8  -4    6.03    0.39
   4   8  -4    6.92    0.39
   4   8  -4    5.23    0.53
  -4  -8   4    6.13    0.40
   4  -8  -4    6.68    0.34
  -4  -8   4    6.11    0.53
  -4  -8   4    5.44    0.40
   4  -8  -4    5.48    0.43
   4  -8  -4    6.60    0.34
   5   8  -4    1.62    0.20
   5   8  -4    2.30    0.32
  -5  -8   4    1.46    0.19
   5  -8  -4    1.44    0.15
  -5  -8   4    1.32    0.19
  -5  -8   4    1.53    0.28
   5  -8  -4    1.64    0.16
   5  -8  -4    1.84    0.25
   6   8  -4    1.95    0.34
  -6  -8   4    1.43    0.31
   6  -8  -4    1.46    0.18
   6  -8  -4    1.74    0.19
   7   8  -4    6.70    0.71
   6   9   4   31.13    2.04
   6  -9   4   29.96    1.58
  -6  -9  -4   29.57    2.03
   6  -9   4   27.10    1.57
   5   9   4   28.27    1.84
   5  -9   4   28.35    1.43
  -5  -9  -4   28.14    1.84
   5  -9   4   24.99    1.42
  -5  -9  -4   24.38    1.46
   4   9   4    4.02    0.45
   4   9   4    3.67    0.39
   4   9   4    3.63    0.29
   4  -9   4    4.51    0.27
  -4  -9  -4    4.13    0.43
   4  -9   4    3.95    0.37
   4  -9   4    4.04    0.26
  -4  -9  -4    4.20    0.32
  -4  -9  -4    3.57    0.32
   3   9   4   12.53    0.72
   3   9   4   12.70    0.92
  -3  -9  -4   13.27    0.73
   3  -9   4   14.01    0.69
  -3  -9  -4   12.64    0.92
   3  -9   4   11.71    0.86
   3  -9   4   13.49    0.69
  -3  -9  -4   12.56    0.73
   3  -9   4   13.84    0.80
   2   9   4   69.07    3.90
   2   9   4   81.90    4.87
   2   9   4   72.50    4.86
  -2  -9  -4   77.37    4.87
  -2  -9  -4   75.50    3.92
  -2  -9  -4   73.70    3.92
   2  -9   4   80.58    3.89
   2  -9   4   77.26    4.14
   2  -9   4   76.54    3.89
   2  -9   4   71.65    4.84
   1   9   4    4.95    0.34
   1   9   4    4.48    0.33
  -1  -9  -4    3.87    0.27
  -1  -9  -4    4.42    0.34
   1  -9   4    4.25    0.25
   1  -9   4    4.27    0.32
   1  -9   4    3.92    0.24
  -1  -9  -4    3.75    0.27
   0   9  -4   21.94    1.42
   0   9  -4   22.44    1.43
   0  -9   4   20.95    1.15
   0  -9   4   21.50    1.43
   0  -9  -4   22.92    1.43
   0  -9  -4   20.81    1.14
   0  -9  -4   22.23    1.14
   0  -9   4   21.85    1.15
   1   9  -4   12.46    0.71
   1   9  -4   14.61    0.91
   1   9  -4   13.71    0.91
   1  -9  -4   13.51    0.88
  -1  -9   4   12.81    0.73
  -1  -9   4   13.64    0.92
   2   9  -4   30.05    1.67
   2   9  -4   30.94    1.67
   2   9  -4   33.80    2.10
  -2  -9   4   31.65    2.10
   2  -9  -4   33.11    1.76
  -2  -9   4   31.78    1.69
  -2  -9   4   32.43    1.69
   3   9  -4   65.68    3.58
   3   9  -4   65.07    4.46
   3   9  -4   65.28    3.59
   3   9  -4   79.10    4.48
  -3  -9   4   68.14    3.59
  -3  -9   4   71.30    4.48
   3  -9  -4   72.23    3.77
  -3  -9   4   66.10    3.59
   4   9  -4   25.50    1.93
   4   9  -4   30.54    1.96
   4   9  -4   29.55    1.56
  -4  -9   4   28.04    1.56
   4  -9  -4   30.50    1.51
  -4  -9   4   30.52    1.96
  -4  -9   4   27.40    1.56
   4  -9  -4   30.18    1.51
   5   9  -4    1.51    0.19
   5   9  -4    2.12    0.32
  -5  -9   4    1.58    0.29
   5  -9  -4    1.73    0.19
  -5  -9   4    1.67    0.21
   5  -9  -4    1.73    0.18
   6   9  -4    2.54    0.38
  -6  -9   4    2.66    0.39
   6  -9  -4    2.33    0.26
   6  -9  -4    2.22    0.26
   6  10   4   -0.12    0.26
   6 -10   4    0.18    0.12
  -6 -10  -4    0.05    0.25
   6 -10   4    0.09    0.13
   5  10   4   11.46    0.91
  -5 -10  -4   12.01    0.92
   5 -10   4   10.76    0.65
   5 -10   4   11.95    0.65
   4  10   4   43.66    2.67
   4  10   4   35.02    2.65
   4  10   4   35.15    2.12
   4 -10   4   43.10    2.27
  -4 -10  -4   38.43    2.14
   4 -10   4   40.11    2.10
  -4 -10  -4   43.03    2.68
   4 -10   4   44.36    2.10
  -4 -10  -4   40.24    2.14
   3  10   4  101.39    5.53
   3  10   4  107.92    6.89
  -3 -10  -4  106.07    6.89
   3 -10   4  108.61    5.50
   3 -10   4  112.71    5.85
  -3 -10  -4  108.81    5.54
  -3 -10  -4  105.56    5.54
   3 -10   4   96.40    6.84
   3 -10   4  115.99    5.50
   2  10   4   62.85    4.20
   2  10   4   71.99    4.21
   2 -10   4   60.24    4.18
   2 -10   4   65.03    3.35
   2 -10   4   65.78    3.58
  -2 -10  -4   65.60    4.21
  -2 -10  -4   60.84    3.38
  -2 -10  -4   66.44    3.38
   2 -10   4   67.46    3.35
   1  10   4    4.10    0.33
   1  10   4    4.02    0.34
   1 -10   4    4.21    0.33
  -1 -10  -4    4.17    0.28
   1 -10   4    4.74    0.26
  -1 -10  -4    4.69    0.28
   1 -10   4    4.54    0.26
  -1 -10  -4    4.16    0.35
   0  10  -4  117.46    7.76
   0  10  -4  121.29    7.75
   0 -10   4  119.78    6.25
   0 -10   4  119.05    7.77
   0 -10  -4  118.16    7.76
   0 -10  -4  120.32    6.24
   0 -10  -4  127.52    6.24
   0 -10   4  128.11    6.25
   1  10  -4   91.31    5.99
   1  10  -4   92.35    6.00
  -1 -10   4   98.96    4.83
  -1 -10   4   94.12    4.83
  -1 -10   4   95.13    6.01
   1 -10  -4   89.33    5.97
   2  10  -4    8.33    0.66
   2  10  -4    8.72    0.50
   2  10  -4    7.81    0.64
   2 -10  -4   10.08    0.55
  -2 -10   4    8.93    0.53
  -2 -10   4   10.03    0.53
  -2 -10   4    9.08    0.66
   3  10  -4   47.83    2.72
   3  10  -4   51.91    3.41
  -3 -10   4   51.78    2.74
  -3 -10   4   53.77    2.74
   3 -10  -4   54.97    2.87
  -3 -10   4   53.33    3.41
   4  10  -4    7.54    0.63
   4  10  -4    6.30    0.58
  -4 -10   4    7.01    0.47
  -4 -10   4    7.22    0.61
   4 -10  -4    7.65    0.39
  -4 -10   4    7.27    0.47
   5  10  -4    5.29    0.58
  -5 -10   4    5.38    0.57
   5 -10  -4    5.44    0.34
   5 -10  -4    5.70    0.34
   6  10  -4   16.31    1.26
   6 -10  -4   16.53    0.93
   6 -10  -4   16.88    0.93
  -6 -10   4   17.46    1.26
   6  11   4    2.72    0.41
   6 -11   4    3.09    0.29
   6 -11   4    3.35    0.30
  -6 -11  -4    3.53    0.52
   5  11   4    0.40    0.25
   5 -11   4    0.24    0.11
  -5 -11  -4    0.38    0.26
   5 -11   4    0.22    0.10
   4  11   4    1.41    0.27
  -4 -11  -4    0.74    0.17
   4 -11   4    1.11    0.12
   4 -11   4    1.06    0.11
  -4 -11  -4    0.82    0.17
   4 -11   4    1.10    0.22
  -4 -11  -4    0.80    0.24
   3  11   4    3.10    0.35
   3  11   4    3.55    0.40
  -3 -11  -4    3.15    0.30
  -3 -11  -4    3.38    0.29
  -3 -11  -4    3.53    0.38
   3 -11   4    3.67    0.35
   3 -11   4    3.82    0.22
   3 -11   4    4.00    0.23
   2  11   4    0.49    0.13
   2  11   4    0.48    0.15
  -2 -11  -4    0.50    0.11
   2 -11   4    0.52    0.07
  -2 -11  -4    0.39    0.15
   2 -11   4    0.60    0.11
   2 -11   4    0.39    0.15
  -2 -11  -4    0.38    0.11
   2 -11   4    0.62    0.07
   1  11   4   73.01    4.86
   1  11   4   72.95    4.86
   1 -11   4   76.67    3.90
  -1 -11  -4   73.58    4.87
   1 -11   4   73.29    4.86
  -1 -11  -4   74.13    3.92
  -1 -11  -4   81.87    3.92
   1 -11   4   80.38    3.91
   0  11  -4    1.51    0.17
   0  11  -4    1.36    0.16
   0 -11   4    1.87    0.16
   0 -11   4    1.75    0.17
   0 -11  -4    1.54    0.19
   0 -11  -4    2.08    0.15
   0 -11   4    1.35    0.21
   0 -11  -4    1.82    0.15
   1  11  -4   67.26    4.19
   1  11  -4   65.05    4.18
  -1 -11   4   63.48    3.37
  -1 -11   4   64.01    4.19
  -1 -11   4   69.05    3.38
   1 -11  -4   61.17    4.16
   2  11  -4   82.19    5.30
   2  11  -4   76.80    5.29
  -2 -11   4   80.25    5.30
   2 -11  -4   86.77    4.48
  -2 -11   4   80.95    4.26
  -2 -11   4   86.08    4.27
   3  11  -4    6.26    0.56
  -3 -11   4    6.60    0.44
  -3 -11   4    6.53    0.44
  -3 -11   4    6.62    0.56
   3 -11  -4    7.29    0.44
   4  11  -4   36.12    2.27
  -4 -11   4   33.13    1.81
  -4 -11   4   31.98    1.81
  -4 -11   4   33.76    2.26
   5  11  -4    0.07    0.24
  -5 -11   4    0.26    0.24
   5 -11  -4    0.26    0.09
   5 -11  -4    0.22    0.09
   6  11  -4    0.02    0.29
  -6 -11   4   -0.12    0.26
   6 -11  -4   -0.08    0.12
   6 -11  -4    0.05    0.12
   5  12   4    0.04    0.26
   5 -12   4    0.28    0.19
  -5 -12  -4   -0.01    0.24
   5 -12   4    0.02    0.10
   5 -12   4   -0.03    0.09
   4 -12   4    5.12    0.45
  -4 -12  -4    4.32    0.39
  -4 -12  -4    5.16    0.52
   4 -12   4    5.35    0.31
   4 -12   4    4.54    0.30
  -4 -12  -4    4.43    0.39
   3  12   4    1.87    0.27
   3  12   4    1.64    0.24
  -3 -12  -4    1.63    0.26
  -3 -12  -4    1.82    0.20
   3 -12   4    2.32    0.16
   3 -12   4    2.44    0.27
   3 -12   4    2.19    0.16
  -3 -12  -4    2.11    0.25
   2  12   4   19.05    1.18
   2  12   4   17.14    1.16
   2 -12   4   16.86    1.03
  -2 -12  -4   17.27    1.19
   2 -12   4   16.82    0.90
  -2 -12  -4   16.60    0.95
   2 -12   4   17.38    0.90
  -2 -12  -4   16.37    0.95
   1  12   4    0.12    0.09
   1  12   4   -0.01    0.11
  -1 -12  -4    0.07    0.12
  -1 -12  -4    0.04    0.09
  -1 -12  -4    0.07    0.09
   1 -12   4    0.15    0.07
   1 -12   4    0.03    0.07
   1 -12   4    0.05    0.09
   0  12  -4    0.25    0.09
   0 -12   4    0.45    0.10
   0 -12  -4    0.58    0.09
   0 -12   4    0.29    0.12
   0 -12   4    0.50    0.10
   0 -12  -4    0.31    0.11
   0 -12  -4    0.62    0.09
   1  12  -4    0.36    0.12
   1 -12  -4    0.00    0.05
  -1 -12   4    0.50    0.14
  -1 -12   4    0.16    0.10
   1 -12  -4    0.21    0.10
  -1 -12   4    0.18    0.10
   1 -12  -4   -0.05    0.06
   2  12  -4    8.42    0.57
   2  12  -4    7.12    0.53
   2 -12  -4    6.22    0.45
  -2 -12   4    6.19    0.44
  -2 -12   4    6.29    0.43
  -2 -12   4    7.14    0.56
   3  12  -4    5.30    0.48
   3  12  -4    6.40    0.53
   3 -12  -4    5.69    0.40
  -3 -12   4    5.50    0.39
  -3 -12   4    5.25    0.40
  -3 -12   4    6.29    0.52
   4  12  -4    0.16    0.22
  -4 -12   4    0.14    0.20
  -4 -12   4    0.27    0.14
  -4 -12   4    0.25    0.14
  -5 -12   4    6.52    0.61
   5 -12  -4    5.13    0.33
   5 -12  -4    5.15    0.33
   5  13   4    0.71    0.27
   5 -13   4    0.17    0.20
   5 -13   4    0.23    0.11
   5 -13   4    0.27    0.11
   4  13   4    0.61    0.25
   4 -13   4    0.73    0.10
   4 -13   4    0.54    0.10
  -4 -13  -4    0.46    0.17
   4 -13   4    0.67    0.21
  -4 -13  -4    0.55    0.25
   3  13   4    0.00    0.18
   3  13   4    0.07    0.14
   3 -13   4    0.08    0.07
   3 -13   4    0.18    0.07
  -3 -13  -4    0.20    0.18
  -3 -13  -4    0.10    0.14
  -3 -13  -4    0.04    0.12
   3 -13   4    0.02    0.16
   2  13   4   35.38    2.03
   2  13   4   31.66    2.01
   2 -13   4   28.54    1.59
  -2 -13  -4   29.39    1.63
   2 -13   4   29.85    1.75
  -2 -13  -4   30.35    2.03
   2 -13   4   30.91    1.59
  -2 -13  -4   28.58    1.63
   1  13   4   39.69    2.63
   1  13   4   42.23    2.63
  -1 -13  -4   39.55    2.66
   1 -13   4   43.03    2.13
  -1 -13  -4   40.02    2.14
   1 -13   4   39.78    2.64
   1 -13   4   40.09    2.12
  -1 -13  -4   41.72    2.14
   0 -13   4   18.39    1.22
   0 -13  -4   18.14    1.21
   0 -13  -4   18.50    0.97
   0 -13  -4   17.91    0.97
   0 -13   4   17.42    0.97
   1  13  -4   16.00    0.97
   1  13  -4   14.78    0.96
  -1 -13   4   14.06    0.99
   1 -13  -4   13.98    0.75
  -1 -13   4   12.94    0.79
  -1 -13   4   13.56    0.79
   1 -13  -4   13.79    0.75
   2  13  -4    9.27    0.65
   2  13  -4    7.91    0.62
  -2 -13   4    8.59    0.52
  -2 -13   4    8.70    0.53
  -2 -13   4    8.38    0.66
   2 -13  -4    8.07    0.54
   3  13  -4   14.30    0.99
  -3 -13   4   14.14    0.81
  -3 -13   4   15.14    1.03
   3 -13  -4   13.22    0.83
  -3 -13   4   13.30    0.81
   4  13  -4    7.69    0.63
  -4 -13   4    5.38    0.46
  -4 -13   4    6.14    0.61
   4 -13  -4    6.66    0.45
   5  13  -4    0.33    0.27
   5 -13  -4    0.31    0.09
   5 -13  -4    0.24    0.08
   5  14   4   19.25    1.32
   5 -14   4   17.36    1.11
   5 -14   4   16.33    0.96
   5 -14   4   18.15    0.96
   4  14   4   13.09    0.98
   4 -14   4   12.93    0.84
   4 -14   4   11.85    0.69
   4 -14   4   13.00    0.69
   3  14   4   42.21    3.10
   3  14   4   47.46    3.11
   3 -14   4   48.74    2.68
  -3 -14  -4   49.14    2.52
   3 -14   4   50.61    2.46
  -3 -14  -4   45.39    2.51
   3 -14   4   48.60    2.46
   2  14   4    0.58    0.16
   2  14   4    0.46    0.14
   2 -14   4    0.44    0.18
  -2 -14  -4    0.27    0.13
   2 -14   4    0.42    0.09
  -2 -14  -4    0.39    0.18
  -2 -14  -4    0.37    0.14
   2 -14   4    0.27    0.08
   1  14   4    0.90    0.12
   1  14   4    0.70    0.13
  -1 -14  -4    0.77    0.14
   1 -14   4    0.69    0.11
   1 -14   4    0.74    0.14
  -1 -14  -4    0.66    0.13
   1 -14   4    0.82    0.11
  -1 -14  -4    0.65    0.17
   0 -14   4    3.42    0.34
   0 -14  -4    4.45    0.27
   0 -14  -4    3.84    0.27
   0 -14  -4    3.03    0.33
   0 -14   4    4.06    0.28
   1  14  -4   56.92    3.44
   1  14  -4   52.54    3.43
   1 -14  -4   54.10    2.75
  -1 -14   4   51.21    3.46
   1 -14  -4   52.45    2.75
  -1 -14   4   53.62    2.78
  -1 -14   4   51.25    2.78
   2  14  -4   10.78    0.74
   2  14  -4    9.62    0.71
   2 -14  -4    9.41    0.62
  -2 -14   4    9.74    0.75
  -2 -14   4    9.42    0.60
  -2 -14   4   10.12    0.60
   3  14  -4    5.38    0.53
  -3 -14   4    5.11    0.40
  -3 -14   4    5.17    0.40
   3 -14  -4    5.58    0.40
   4  14  -4    7.87    0.71
   4 -14  -4    8.04    0.54
   5  14  -4    6.35    0.65
   5 -14  -4    5.46    0.32
   5 -14  -4    5.16    0.32
   4  15   4    1.65    0.31
   4 -15   4    1.37    0.14
   4 -15   4    1.41    0.14
   4 -15   4    1.49    0.26
   3  15   4   27.30    1.80
   3 -15   4   26.29    1.56
  -3 -15  -4   24.57    1.46
   3 -15   4   27.82    1.40
  -3 -15  -4   27.30    1.46
   3 -15   4   25.99    1.39
   2  15   4   19.71    1.47
   2  15   4   21.82    1.48
   2 -15   4   23.22    1.17
  -2 -15  -4   21.81    1.21
  -2 -15  -4   23.18    1.22
   2 -15   4   22.55    1.17
   2 -15   4   22.58    1.32
  -1 -15  -4   54.63    3.04
   1 -15   4   58.08    3.02
  -1 -15  -4   60.07    3.04
   1 -15   4   59.98    3.02
   0 -15   4    0.17    0.11
   0 -15  -4    0.13    0.10
   0 -15  -4    0.15    0.10
   0 -15   4    0.16    0.10
   1  15  -4    3.59    0.34
   1  15  -4    3.34    0.31
   1 -15  -4    3.79    0.25
   1 -15  -4    4.39    0.26
  -1 -15   4    4.16    0.31
  -1 -15   4    3.78    0.31
   2  15  -4   19.54    1.24
   2  15  -4   16.96    1.22
   2 -15  -4   18.10    1.06
  -2 -15   4   16.93    1.01
  -2 -15   4   18.18    1.01
   3  15  -4    3.00    0.38
  -3 -15   4    3.28    0.34
   3 -15  -4    4.00    0.33
  -3 -15   4    3.43    0.34
   4  15  -4   11.93    0.94
   4 -15  -4   11.52    0.73
   3  16   4    2.27    0.31
  -3 -16  -4    2.85    0.34
   3 -16   4    2.81    0.22
   3 -16   4    2.62    0.21
   3 -16   4    3.08    0.35
  -3 -16  -4    2.53    0.27
   2  16   4    0.77    0.16
   2  16   4    0.89    0.19
  -2 -16  -4    0.69    0.17
   2 -16   4    1.02    0.13
   2 -16   4    0.94    0.12
   2 -16   4    0.85    0.23
  -2 -16  -4    0.73    0.18
   1 -16   4    0.33    0.11
   1 -16   4    0.37    0.11
  -1 -16  -4    0.32    0.13
  -1 -16  -4    0.36    0.14
   0 -16  -4    1.50    0.16
   0 -16   4    1.54    0.17
   0 -16  -4    1.62    0.17
   0 -16   4    1.17    0.17
   1  16  -4   14.35    1.05
   1 -16  -4   15.27    0.86
  -1 -16   4   17.10    0.91
  -1 -16   4   16.62    0.91
   1 -16  -4   17.01    0.86
   2  16  -4    0.24    0.18
   2  16  -4    0.14    0.14
  -2 -16   4    0.16    0.15
  -2 -16   4    0.49    0.16
   2 -16  -4    0.32    0.16
   3  16  -4    3.52    0.43
  -3 -16   4    2.76    0.34
   3 -16  -4    2.95    0.32
   3  17   4    4.52    0.45
  -3 -17  -4    3.29    0.38
   3 -17   4    3.85    0.28
   3 -17   4    3.56    0.44
   3 -17   4    3.91    0.27
   2 -17   4    1.10    0.15
   2 -17   4    1.06    0.25
  -2 -17  -4    1.01    0.19
   2 -17   4    1.48    0.15
  -2 -17  -4    1.04    0.20
  -1 -17  -4    2.19    0.22
  -1 -17  -4    2.05    0.22
   1 -17   4    2.35    0.24
   0 -17  -4    0.29    0.13
   0 -17   4    0.29    0.13
   0 -17   4    0.39    0.13
   0 -17  -4    0.30    0.12
  -1 -17   4    0.17    0.14
   1 -17  -4    0.24    0.10
   1 -17  -4    0.29    0.10
  -1 -17   4    0.16    0.14
   2  17  -4    1.12    0.21
   2  17  -4    0.91    0.18
   2 -17  -4    0.94    0.10
  -2 -17   4    0.78    0.18
   2 -17  -4    0.90    0.10
   2 -17  -4    0.82    0.19
  -2 -17   4    0.67    0.18
   3 -17  -4    3.20    0.35
  -3 -17   4    3.00    0.36
  -1 -18  -4    0.20    0.14
  -1 -18  -4    0.07    0.15
   1 -18   4    0.00    0.12
   0 -18   4    4.30    0.35
   0 -18   4    4.45    0.36
   0 -18  -4    4.61    0.35
   0 -18  -4    4.44    0.34
   1 -18  -4    6.17    0.39
  -1 -18   4    5.75    0.45
  -1 -18   4    6.17    0.45
   1 -18  -4    6.38    0.40
  -7   0  -5    0.14    0.22
   6   0   5    0.12    0.13
   6   0   5    0.12    0.19
  -6   0  -5    0.21    0.18
   6   0   5    0.11    0.12
  -5   0  -5   -0.02    0.03
  -5   0  -5   -0.08    0.15
   5   0   5    0.04    0.11
  -5   0  -5    0.02    0.12
  -5   0  -5    0.05    0.07
   5   0   5   -0.01    0.14
   5   0   5   -0.01    0.11
  -4   0  -5    0.39    0.15
  -4   0  -5    0.50    0.13
   4   0   5    0.59    0.12
  -4   0  -5    0.20    0.11
   4   0   5    0.22    0.10
  -4   0  -5    0.30    0.09
   4   0   5    0.36    0.15
  -4   0  -5    0.40    0.09
  -3   0  -5    0.11    0.06
  -3   0  -5    0.19    0.10
  -3   0  -5    0.14    0.06
   3   0   5    0.10    0.06
   3   0   5    0.14    0.10
  -3   0  -5    0.10    0.08
   3   0   5    0.10    0.09
  -3   0  -5    0.15    0.08
   3   0   5    0.13    0.07
   2   0   5    0.06    0.05
   2   0   5    0.06    0.05
  -2   0  -5    0.02    0.06
  -2   0  -5    0.11    0.05
   2   0   5    0.03    0.07
  -2   0  -5    0.12    0.05
  -2   0  -5    0.04    0.07
  -2   0  -5    0.09    0.08
   1   0   5   -0.50    0.07
  -1   0  -5   -0.57    0.04
  -1   0  -5   -0.56    0.06
   1   0   5   -0.65    0.05
   1   0   5   -0.50    0.05
  -1   0  -5   -0.58    0.05
  -1   0  -5   -0.57    0.07
   1   0   5   -0.52    0.05
   1   0   5   -0.55    0.06
  -1   0  -5   -0.52    0.04
   0   0   5    0.03    0.06
   0   0  -5    0.21    0.05
   0   0   5   -0.03    0.02
   0   0   5   -0.05    0.06
   0   0   5    0.01    0.04
   0   0  -5    0.01    0.06
   0   0  -5    0.01    0.04
   0   0   5   -0.01    0.03
  -1   0   5   -0.03    0.03
   1   0  -5    0.00    0.04
   1   0  -5   -0.02    0.04
  -1   0   5   -0.02    0.03
   1   0  -5    0.14    0.06
  -1   0   5    0.01    0.05
   1   0  -5    0.00    0.06
   2   0  -5    0.41    0.07
  -2   0   5    0.35    0.06
   2   0  -5    0.48    0.07
   2   0  -5    0.30    0.09
  -2   0   5    0.49    0.06
  -2   0   5    0.41    0.09
   2   0  -5    0.50    0.09
   3   0  -5    0.03    0.09
  -3   0   5    0.04    0.05
   3   0  -5    0.15    0.07
   3   0  -5   -0.01    0.09
  -3   0   5    0.05    0.05
   3   0  -5    0.28    0.07
  -3   0   5    0.19    0.11
   4   0  -5    0.25    0.13
  -4   0   5    0.21    0.10
   4   0  -5    0.41    0.10
  -4   0   5    0.35    0.08
  -4   0   5    0.42    0.14
  -4   0   5    0.26    0.07
   4   0  -5    0.45    0.10
  -5   0   5    0.42    0.18
   5   0  -5    0.10    0.11
  -5   0   5    0.17    0.13
   5   0  -5    0.18    0.12
   5   0  -5    0.18    0.16
   6   0  -5   -0.38    0.12
   6   0  -5   -0.26    0.17
   6   0  -5   -0.24    0.12
   7   0  -5    0.19    0.16
  -7   0   5    0.35    0.23
  -7   1  -5    6.40    0.58
   7  -1   5    5.26    0.45
  -7  -1  -5    5.88    0.60
  -6   1  -5   37.28    2.23
   6   1   5   33.44    2.24
   6   1   5   32.23    1.79
  -6   1  -5   30.73    2.21
   6   1   5   32.87    1.79
   6  -1   5   33.67    2.23
  -6  -1  -5   35.36    2.24
   6  -1   5   33.58    1.79
   6  -1   5   31.09    1.79
   5   1   5    9.05    0.53
   5   1   5    8.52    0.52
  -5   1  -5    8.04    0.64
  -5   1  -5    7.93    0.57
   5   1   5    8.34    0.67
  -5   1  -5   10.11    0.66
   5  -1   5    8.35    0.66
   5  -1   5    8.73    0.52
   5  -1   5    8.90    0.52
  -5  -1  -5    7.96    0.50
  -5  -1  -5    8.90    0.67
  -5  -1  -5    7.79    0.56
  -5  -1  -5    8.43    0.65
  -4   1  -5    0.85    0.15
  -4   1  -5    0.36    0.12
  -4   1  -5    0.84    0.10
  -4   1  -5    0.58    0.15
   4   1   5    0.56    0.10
   4   1   5    0.62    0.14
   4   1   5    0.68    0.11
   4   1   5    0.32    0.15
  -4   1  -5    0.87    0.10
   4  -1   5    0.58    0.10
   4  -1   5    0.46    0.10
  -4  -1  -5    0.74    0.17
  -4  -1  -5    0.86    0.11
   4  -1   5    0.38    0.13
  -4  -1  -5    0.64    0.15
  -4  -1  -5    0.51    0.09
  -3   1  -5    4.14    0.25
  -3   1  -5    4.49    0.30
  -3   1  -5    4.37    0.25
   3   1   5    4.24    0.27
   3   1   5    3.55    0.33
   3   1   5    3.36    0.34
  -3   1  -5    4.09    0.33
  -3  -1  -5    4.62    0.27
  -3  -1  -5    3.80    0.34
   3  -1   5    3.61    0.33
   3  -1   5    4.55    0.27
   3  -1   5    4.32    0.26
   3  -1   5    3.52    0.32
  -3  -1  -5    4.35    0.26
  -3  -1  -5    4.09    0.34
   2   1   5    6.42    0.37
  -2   1  -5    6.60    0.37
  -2   1  -5    6.36    0.36
  -2   1  -5    6.58    0.46
   2   1   5    6.67    0.37
  -2   1  -5    6.21    0.40
   2   1   5    6.18    0.46
   2   1   5    6.55    0.47
  -2  -1  -5    7.31    0.37
   2  -1   5    6.48    0.46
   2  -1   5    6.70    0.37
   2  -1   5    6.26    0.46
   2  -1   5    6.75    0.37
  -2  -1  -5    6.37    0.37
  -2  -1  -5    6.13    0.46
  -2  -1  -5    6.59    0.47
  -1   1  -5  362.23   23.66
  -1   1  -5  380.43   19.04
   1   1   5  383.34   19.03
  -1   1  -5  382.86   23.66
  -1   1  -5  389.35   19.02
   1   1   5  336.14   23.59
   1   1   5  378.47   23.68
  -1   1  -5  366.79   20.02
  -1  -1  -5  366.10   19.99
   1  -1   5  361.35   23.61
  -1  -1  -5  367.52   23.66
   1  -1   5  373.92   19.03
   1  -1   5  364.94   19.01
   1  -1   5  366.81   20.03
   1  -1   5  355.06   23.62
  -1  -1  -5  356.11   23.64
  -1  -1  -5  380.93   19.04
   0   1  -5  343.11   22.59
   0   1   5  360.20   22.61
   0   1   5  349.65   22.58
   0   1  -5  342.52   22.59
   0   1   5  357.70   18.17
   0   1   5  366.96   18.18
   0   1   5  368.38   19.07
   0   1  -5  360.23   18.17
   0  -1   5  357.52   22.60
   0  -1  -5  359.59   18.18
   0  -1  -5  353.63   22.58
   0  -1   5  337.43   22.56
   0  -1   5  368.44   18.19
   0  -1   5  301.80   18.17
   0  -1  -5  345.14   22.60
   0  -1  -5  368.10   19.07
   0  -1  -5  354.77   18.18
   1   1  -5  121.93    7.89
   1   1  -5  122.50    7.89
  -1   1   5  125.19    6.37
  -1   1   5  128.73    6.40
   1   1  -5  125.18    6.35
   1   1  -5  129.53    6.42
  -1   1   5  124.35    7.93
  -1  -1   5  117.62    7.89
   1  -1  -5  118.92    7.91
  -1  -1   5  119.80    7.93
   1  -1  -5  125.23    6.41
   1  -1  -5  113.76    7.88
   1  -1  -5  125.58    6.34
  -1  -1   5  130.92    6.40
   2   1  -5   85.75    4.37
  -2   1   5   86.03    4.36
   2   1  -5   79.66    5.43
  -2   1   5   72.75    5.42
   2   1  -5   86.91    5.43
  -2   1   5   87.51    4.36
  -2   1   5   87.65    5.43
   2   1  -5   84.20    4.37
  -2  -1   5   85.10    4.37
   2  -1  -5   86.59    4.37
   2  -1  -5   80.45    5.43
   2  -1  -5   87.26    4.37
  -2  -1   5   82.23    5.43
  -2  -1   5   82.78    5.43
   2  -1  -5   87.86    5.43
  -2  -1   5   93.92    4.37
   3   1  -5    3.66    0.24
   3   1  -5    3.50    0.31
  -3   1   5    3.81    0.30
  -3   1   5    3.46    0.29
   3   1  -5    3.15    0.30
  -3   1   5    3.63    0.22
   3   1  -5    3.71    0.24
  -3   1   5    3.47    0.22
  -3  -1   5    3.70    0.23
   3  -1  -5    3.36    0.29
  -3  -1   5    3.60    0.31
   3  -1  -5    3.50    0.30
   3  -1  -5    3.75    0.24
  -3  -1   5    3.25    0.30
  -3  -1   5    3.65    0.23
   3  -1  -5    3.49    0.24
  -4   1   5  183.66   12.00
   4   1  -5  189.71   12.02
   4   1  -5  188.06    9.67
   4   1  -5  186.15    9.67
  -4   1   5  200.66   12.05
  -4   1   5  182.48    9.65
   4  -1  -5  186.06    9.66
  -4  -1   5  193.48   12.02
  -4  -1   5  185.88    9.66
   4  -1  -5  189.76    9.66
   4  -1  -5  186.38   12.01
  -4  -1   5  182.43    9.66
  -5   1   5    4.52    0.40
   5   1  -5    4.27    0.32
   5   1  -5    3.97    0.32
  -5   1   5    3.91    0.36
   5   1  -5    4.24    0.41
   5  -1  -5    4.12    0.31
  -5  -1   5    3.49    0.28
  -5  -1   5    4.23    0.41
   5  -1  -5    3.85    0.39
   5  -1  -5    4.20    0.31
  -6   1   5    0.65    0.22
   6   1  -5    0.92    0.18
  -6   1   5    0.74    0.18
   6   1  -5    0.73    0.17
   6   1  -5    0.70    0.23
   6  -1  -5    0.60    0.15
  -6  -1   5    0.50    0.22
   6  -1  -5    0.63    0.16
   6  -1  -5    0.70    0.21
  -6  -1   5    0.89    0.20
  -7   1   5    5.78    0.54
  -7  -1   5    5.71    0.57
   7  -1  -5    4.78    0.42
   7  -1  -5    4.57    0.42
  -7   2  -5   -0.07    0.19
  -7  -2  -5    0.20    0.24
   7  -2   5    0.20    0.17
   6   2   5    0.26    0.21
   6   2   5   -0.04    0.13
   6   2   5    0.01    0.13
  -6   2  -5    0.08    0.14
  -6   2  -5    0.15    0.17
   6  -2   5    0.10    0.12
  -6  -2  -5    0.15    0.19
   6  -2   5    0.14    0.18
   6  -2   5    0.07    0.12
   5   2   5   31.88    1.67
   5   2   5   29.59    2.08
  -5   2  -5   34.02    2.07
  -5   2  -5   30.39    2.06
   5   2   5   31.34    1.67
  -5   2  -5   31.17    1.78
  -5  -2  -5   32.12    1.66
  -5  -2  -5   33.43    2.09
  -5  -2  -5   28.83    1.65
   5  -2   5   29.19    2.06
   5  -2   5   31.57    1.66
   5  -2   5   33.06    1.66
  -5  -2  -5   28.90    2.07
  -4   2  -5   51.35    2.70
   4   2   5   52.60    2.72
   4   2   5   55.29    3.39
  -4   2  -5   55.96    3.38
   4   2   5   50.64    2.72
   4   2   5   46.58    3.38
  -4   2  -5   52.01    3.37
  -4   2  -5   51.38    2.88
  -4  -2  -5   50.51    2.71
  -4  -2  -5   53.88    3.39
  -4  -2  -5   53.01    2.72
   4  -2   5   53.08    3.38
  -4  -2  -5   49.09    3.38
   4  -2   5   51.78    2.72
   4  -2   5   54.53    2.72
   3   2   5  273.32   13.72
  -3   2  -5  247.87   17.05
   3   2   5  276.45   13.66
   3   2   5  245.59   16.98
  -3   2  -5  284.05   17.06
  -3   2  -5  275.67   13.75
  -3   2  -5  257.74   14.41
  -3   2  -5  271.44   13.69
   3  -2   5  274.55   13.70
  -3  -2  -5  277.43   13.72
   3  -2   5  246.97   16.97
   3  -2   5  261.78   16.97
  -3  -2  -5  262.54   17.04
  -3  -2  -5  268.15   13.70
   3  -2   5  272.86   13.78
  -3  -2  -5  261.31   16.98
   2   2   5   49.35    3.11
  -2   2  -5   46.01    2.63
  -2   2  -5   48.26    2.49
   2   2   5   47.37    3.11
   2   2   5   49.94    2.50
  -2   2  -5   49.26    3.10
  -2   2  -5   49.21    2.49
  -2  -2  -5   47.11    3.11
   2  -2   5   46.20    3.10
   2  -2   5   47.42    3.10
   2  -2   5   48.98    2.50
   2  -2   5   46.76    2.63
  -2  -2  -5   49.08    3.11
  -2  -2  -5   48.95    2.50
   2  -2   5   48.67    2.49
  -1   2  -5    0.06    0.04
   1   2   5    0.12    0.05
  -1   2  -5    0.01    0.06
  -1   2  -5    0.07    0.04
  -1   2  -5    0.09    0.06
   1   2   5    0.06    0.06
   1   2   5    0.15    0.05
  -1  -2  -5    0.10    0.05
  -1  -2  -5    0.11    0.07
   1  -2   5    0.11    0.05
   1  -2   5   -0.01    0.06
  -1  -2  -5    0.07    0.05
   1  -2   5    0.06    0.06
  -1  -2  -5    0.16    0.07
   1  -2   5   -0.01    0.05
   1  -2   5    0.01    0.04
   0   2  -5  448.44   23.76
   0   2   5  485.39   23.75
   0   2   5  442.18   29.52
   0   2  -5  497.82   23.78
   0   2   5  462.10   23.75
   0   2  -5  466.08   29.55
   0   2  -5  459.33   29.54
   0  -2   5  469.65   23.77
   0  -2  -5  445.09   29.52
   0  -2  -5  468.19   23.75
   0  -2   5  442.78   29.53
   0  -2   5  467.37   29.56
   0  -2  -5  443.52   29.50
   0  -2   5  463.48   23.77
   0  -2  -5  462.34   23.76
  -1   2   5  126.98    6.50
  -1   2   5  128.04    8.11
   1   2  -5  124.36    8.05
   1   2  -5  127.34    8.08
  -1   2   5  128.27    8.05
  -1   2   5  123.06    6.50
  -1  -2   5  125.85    8.05
   1  -2  -5  124.74    6.51
  -1  -2   5  127.52    6.55
   1  -2  -5  128.16    8.08
   1  -2  -5  120.45    8.06
  -1  -2   5  127.85    8.05
   2   2  -5  128.54    7.29
   2   2  -5  148.06    7.29
   2   2  -5  141.38    9.06
  -2   2   5  138.59    7.29
  -2   2   5  139.54    9.07
  -2   2   5  141.49    9.06
   2   2  -5  137.49    9.06
  -2   2   5  147.50    7.30
  -2  -2   5  145.28    9.06
  -2  -2   5  147.63    7.33
  -2  -2   5  146.35    7.29
   2  -2  -5  142.51    9.05
  -2  -2   5  139.34    9.06
   2  -2  -5  142.48    7.32
   2  -2  -5  136.15    9.05
   2  -2  -5  145.75    7.29
   3   2  -5    7.52    0.44
  -3   2   5    8.22    0.54
  -3   2   5    6.70    0.53
   3   2  -5    7.86    0.44
   3   2  -5    6.78    0.55
  -3   2   5    8.05    0.41
  -3   2   5    8.26    0.41
   3   2  -5    6.88    0.56
  -3  -2   5    6.45    0.54
  -3  -2   5    7.44    0.56
   3  -2  -5    8.38    0.43
   3  -2  -5    8.64    0.44
  -3  -2   5    7.93    0.44
   3  -2  -5    7.18    0.54
  -3  -2   5    8.33    0.44
   3  -2  -5    7.08    0.54
  -4   2   5    8.19    0.55
   4   2  -5    6.77    0.57
   4   2  -5    8.11    0.59
   4   2  -5    7.44    0.46
   4   2  -5    7.33    0.46
  -4   2   5    8.37    0.56
  -4  -2   5    7.09    0.44
  -4  -2   5    7.29    0.45
  -4  -2   5    7.88    0.59
  -4  -2   5    7.91    0.57
   4  -2  -5    7.23    0.45
   4  -2  -5    7.71    0.45
   4  -2  -5    7.81    0.56
   5   2  -5    7.82    0.52
   5   2  -5    7.78    0.52
   5   2  -5    9.93    0.68
  -5   2   5    9.33    0.64
  -5  -2   5    9.15    0.67
  -5  -2   5    7.39    0.50
   5  -2  -5    9.38    0.65
   5  -2  -5    8.30    0.51
  -5  -2   5    8.85    0.64
   5  -2  -5    7.63    0.51
  -6   2   5   31.19    1.89
   6   2  -5   26.53    1.53
   6   2  -5   28.08    1.53
   6   2  -5   28.38    1.91
  -6   2   5   26.58    1.61
  -6   2   5   26.75    1.87
   6  -2  -5   29.14    1.52
   6  -2  -5   27.79    1.52
  -6  -2   5   30.01    1.91
   6  -2  -5   27.12    1.89
  -7   2   5    0.15    0.19
  -7  -2   5   -0.03    0.23
   7  -2  -5    0.18    0.16
   7  -2  -5   -0.02    0.15
   7   3   5    5.16    0.60
  -7   3  -5    5.30    0.51
   7  -3   5    4.96    0.42
  -7  -3  -5    5.90    0.59
   7  -3   5    4.89    0.43
   6   3   5    4.26    0.35
   6   3   5    4.39    0.48
  -6   3  -5    3.66    0.38
   6   3   5    4.41    0.34
  -6   3  -5    3.80    0.42
  -6  -3  -5    4.39    0.47
   6  -3   5    3.99    0.34
   6  -3   5    3.68    0.34
   6  -3   5    2.79    0.41
  -5   3  -5   86.67    5.11
  -5   3  -5   71.74    4.35
   5   3   5   80.56    4.13
   5   3   5   74.96    4.12
   5   3   5   85.17    5.14
  -5   3  -5   79.22    5.11
  -5  -3  -5   71.29    5.12
  -5  -3  -5   75.60    4.12
   5  -3   5   76.57    4.12
  -5  -3  -5   74.16    4.12
   5  -3   5   84.55    4.12
  -5  -3  -5   89.38    5.15
   5  -3   5   81.20    5.12
   4   3   5   20.62    1.55
  -4   3  -5   23.57    1.54
  -4   3  -5   25.31    1.54
  -4   3  -5   21.57    1.33
   4   3   5   21.89    1.25
   4   3   5   22.83    1.25
   4   3   5   25.51    1.57
   4  -3   5   23.96    1.24
  -4  -3  -5   24.74    1.57
   4  -3   5   21.73    1.24
   4  -3   5   25.22    1.55
  -4  -3  -5   23.33    1.25
  -4  -3  -5   22.12    1.24
   3   3   5   24.44    1.26
   3   3   5   22.44    1.57
   3   3   5   22.20    1.57
  -3   3  -5   23.74    1.24
  -3   3  -5   24.17    1.56
  -3   3  -5   25.02    1.56
  -3   3  -5   22.92    1.34
  -3   3  -5   24.31    1.23
  -3  -3  -5   24.88    1.26
  -3  -3  -5   20.84    1.26
   3  -3   5   25.07    1.25
   3  -3   5   24.15    1.25
  -3  -3  -5   24.28    1.58
   2   3   5   66.40    3.29
  -2   3  -5   66.12    3.27
   2   3   5   60.03    4.09
  -2   3  -5   67.74    3.27
  -2   3  -5   61.74    4.08
   2   3   5   64.12    3.29
  -2   3  -5   64.05    4.08
  -2   3  -5   61.09    3.47
   2   3   5   60.25    4.09
  -2  -3  -5   62.40    4.09
   2  -3   5   66.10    3.28
   2  -3   5   62.62    4.08
   2  -3   5   62.69    3.47
   2  -3   5   65.92    3.28
  -2  -3  -5   67.29    3.29
  -2  -3  -5   62.78    4.09
   2  -3   5   59.52    4.08
  -2  -3  -5   63.56    3.29
   1   3   5  592.72   30.08
   1   3   5  574.11   37.40
  -1   3  -5  619.59   30.06
   1   3   5  577.29   30.09
   1   3   5  566.22   37.38
  -1   3  -5  597.66   37.39
  -1   3  -5  537.40   37.37
  -1  -3  -5  586.18   30.11
   1  -3   5  556.11   31.68
  -1  -3  -5  621.78   30.11
   1  -3   5  602.21   30.09
  -1  -3  -5  599.72   37.41
   1  -3   5  593.19   37.42
   1  -3   5  554.95   37.39
  -1  -3  -5  572.98   37.38
   1  -3   5  602.08   30.08
   0   3   5  392.29   19.91
   0   3   5  384.22   24.77
   0   3  -5  388.78   19.95
   0   3  -5  383.94   24.81
   0   3  -5  402.86   19.94
   0   3   5  378.52   19.92
   0  -3  -5  367.63   24.76
   0  -3  -5  386.65   24.79
   0  -3   5  368.40   24.77
   0  -3  -5  399.55   19.94
   0  -3   5  386.16   24.78
   0  -3  -5  395.64   19.94
   0  -3   5  388.99   19.95
   0  -3   5  395.94   19.95
   1   3  -5  239.38   12.22
   1   3  -5  234.79   15.15
   1   3  -5  231.99   15.12
  -1   3   5  234.82   15.14
   1   3  -5  240.43   12.16
  -1   3   5  241.09   15.12
   1  -3  -5  231.06   12.16
  -1  -3   5  235.46   12.17
   1  -3  -5  222.05   15.14
  -1  -3   5  240.86   15.17
  -1  -3   5  235.76   15.15
   1  -3  -5  244.14   15.13
  -2   3   5   82.71    5.37
   2   3  -5   82.32    4.32
  -2   3   5   85.97    5.35
   2   3  -5   88.44    5.37
   2   3  -5   80.50    5.36
  -2   3   5   81.67    4.52
  -2  -3   5   86.19    4.32
  -2  -3   5   83.81    5.37
   2  -3  -5   85.85    4.30
   2  -3  -5   77.62    5.35
  -2  -3   5   82.88    5.37
   2  -3  -5   89.56    5.35
   2  -3  -5   80.03    4.30
  -3   3   5    7.11    0.55
   3   3  -5    7.74    0.59
  -3   3   5    9.18    0.48
   3   3  -5    8.56    0.47
  -3   3   5    7.65    0.56
   3   3  -5    8.47    0.47
   3   3  -5    7.81    0.59
   3  -3  -5    8.41    0.45
   3  -3  -5    7.41    0.56
  -3  -3   5    8.45    0.47
  -3  -3   5    8.41    0.60
  -3  -3   5    8.55    0.46
  -3  -3   5    6.94    0.58
   3  -3  -5    8.43    0.45
  -4   3   5   41.96    2.25
   4   3  -5   41.31    2.14
   4   3  -5   40.41    2.14
   4   3  -5   42.99    2.68
   4   3  -5   37.43    2.66
  -4   3   5   40.92    2.64
  -4   3   5   41.38    2.64
  -4  -3   5   42.46    2.67
   4  -3  -5   43.74    2.13
   4  -3  -5   40.72    2.13
  -4  -3   5   37.51    2.66
   4  -3  -5   40.43    2.65
  -4  -3   5   41.18    2.14
  -4  -3   5   38.81    2.14
  -5   3   5    2.13    0.27
   5   3  -5    2.32    0.24
   5   3  -5    1.79    0.27
  -5   3   5    2.13    0.24
  -5   3   5    1.76    0.25
   5   3  -5    2.29    0.26
   5  -3  -5    1.98    0.28
  -5  -3   5    1.88    0.28
   5  -3  -5    2.44    0.23
  -5  -3   5    1.68    0.24
  -5  -3   5    2.25    0.21
   5  -3  -5    2.25    0.23
  -5  -3   5    2.27    0.22
   6   3  -5   -0.05    0.12
   6   3  -5    0.14    0.21
  -6   3   5    0.14    0.15
  -6   3   5    0.26    0.14
   6   3  -5    0.19    0.13
  -6   3   5   -0.02    0.13
   6  -3  -5    0.19    0.17
   6  -3  -5   -0.04    0.12
   6  -3  -5   -0.08    0.13
  -6  -3   5    0.27    0.22
  -7   3   5    2.34    0.30
   7  -3  -5    2.34    0.26
  -7  -3   5    2.81    0.37
   7  -3  -5    2.45    0.27
  -7   4  -5    3.15    0.39
   7   4   5    3.02    0.43
   7  -4   5    3.01    0.34
   7  -4   5    2.86    0.35
  -7  -4  -5    3.85    0.51
  -6   4  -5    0.51    0.16
   6   4   5    0.76    0.25
  -6   4  -5    0.27    0.17
   6  -4   5    0.33    0.15
  -6  -4  -5    0.11    0.22
   6  -4   5    0.36    0.15
  -5   4  -5    0.34    0.17
   5   4   5    0.21    0.12
  -5   4  -5    0.61    0.14
   5   4   5    0.45    0.21
   5   4   5    0.51    0.14
  -5   4  -5    0.85    0.16
  -5  -4  -5    0.44    0.12
   5  -4   5    0.64    0.12
  -5  -4  -5    0.47    0.13
  -5  -4  -5    0.35    0.20
   5  -4   5    0.53    0.12
   4   4   5   64.37    4.61
  -4   4  -5   73.26    3.92
  -4   4  -5   72.55    4.59
   4   4   5   70.64    4.62
   4   4   5   74.75    3.71
  -4   4  -5   73.11    4.59
   4  -4   5   72.76    3.70
  -4  -4  -5   70.22    3.71
  -4  -4  -5   60.40    4.60
   4  -4   5   66.80    4.59
  -4  -4  -5   75.45    3.71
  -4  -4  -5   75.52    4.62
   4  -4   5   77.90    3.70
   3   4   5    0.72    0.15
  -3   4  -5    0.84    0.12
   3   4   5    0.81    0.14
   3   4   5    0.95    0.11
   3   4   5    0.90    0.10
  -3   4  -5    0.80    0.12
  -3   4  -5    0.83    0.13
  -3  -4  -5    0.52    0.13
  -3  -4  -5    0.91    0.15
   3  -4   5    0.91    0.14
  -3  -4  -5    0.87    0.10
   3  -4   5    0.90    0.13
   3  -4   5    0.94    0.10
   3  -4   5    1.08    0.13
   2   4   5    0.20    0.09
  -2   4  -5    0.22    0.08
   2   4   5    0.45    0.07
  -2   4  -5    0.30    0.08
   2   4   5    0.43    0.11
   2   4   5    0.23    0.07
  -2   4  -5    0.24    0.08
  -2  -4  -5    0.38    0.11
  -2  -4  -5    0.30    0.10
  -2  -4  -5    0.26    0.06
   2  -4   5    0.29    0.10
   2  -4   5    0.25    0.08
   2  -4   5    0.31    0.06
  -2  -4  -5    0.40    0.08
   2  -4   5    0.36    0.06
   2  -4   5    0.37    0.09
   1   4   5   18.24    1.31
  -1   4  -5   20.99    1.04
  -1   4  -5   19.87    1.30
  -1   4  -5   19.54    1.30
  -1   4  -5   20.87    1.04
   1   4   5   20.16    1.05
   1   4   5   20.99    1.05
  -1  -4  -5   19.62    1.05
  -1  -4  -5   21.49    1.06
   1  -4   5   17.74    1.30
  -1  -4  -5   19.36    1.31
   1  -4   5   21.32    1.05
  -1  -4  -5   19.92    1.31
   1  -4   5   19.56    1.31
   1  -4   5   20.31    1.12
   1  -4   5   20.68    1.05
   0   4  -5    0.05    0.04
   0   4  -5    0.27    0.04
   0   4   5    0.09    0.03
   0   4  -5    0.13    0.04
   0   4   5    0.09    0.03
   0   4  -5    0.18    0.07
   0   4   5    0.19    0.06
   0  -4   5    0.19    0.05
   0  -4  -5    0.33    0.07
   0  -4  -5    0.08    0.04
   0  -4   5    0.08    0.04
   0  -4   5    0.21    0.07
   0  -4   5    0.31    0.07
   0  -4  -5    0.12    0.04
   0  -4  -5    0.09    0.06
  -1   4   5  188.77   11.80
   1   4  -5  179.95   11.75
   1   4  -5  190.88    9.51
   1   4  -5  187.93   11.76
  -1   4   5  186.25   11.79
   1   4  -5  183.39    9.47
   1  -4  -5  182.85    9.48
   1  -4  -5  186.27   11.80
   1  -4  -5  170.39   11.80
  -1  -4   5  181.39   11.76
  -1  -4   5  185.36   11.76
   1  -4  -5  186.96    9.95
  -1  -4   5  183.99    9.54
  -2   4   5  155.86    9.76
  -2   4   5  150.29    9.75
  -2   4   5  153.99    8.26
   2   4  -5  147.16    9.75
   2   4  -5  163.19    7.85
   2   4  -5  141.13    9.75
  -2  -4   5  162.18    7.87
  -2  -4   5  143.49    9.75
   2  -4  -5  146.57    9.73
   2  -4  -5  156.85    7.86
   2  -4  -5  142.48    9.73
  -2  -4   5  153.88    9.75
  -2  -4   5  163.52    7.85
   2  -4  -5  155.21    7.87
   3   4  -5    8.86    0.49
   3   4  -5    8.95    0.62
  -3   4   5    8.57    0.58
  -3   4   5    9.12    0.57
   3   4  -5    8.03    0.61
  -3   4   5    8.41    0.50
  -3  -4   5    6.91    0.48
  -3  -4   5    8.57    0.62
   3  -4  -5    8.30    0.47
   3  -4  -5    8.67    0.59
   3  -4  -5    8.90    0.47
  -3  -4   5    8.78    0.49
  -3  -4   5    8.16    0.61
   4   4  -5   -0.02    0.14
   4   4  -5    0.13    0.10
  -4   4   5   -0.07    0.09
  -4   4   5    0.14    0.09
   4   4  -5   -0.01    0.11
   4   4  -5    0.03    0.09
  -4   4   5    0.04    0.09
  -4  -4   5    0.06    0.09
  -4  -4   5    0.07    0.12
   4  -4  -5    0.18    0.11
  -4  -4   5    0.01    0.08
   4  -4  -5    0.04    0.08
  -4  -4   5   -0.01    0.15
   4  -4  -5   -0.05    0.07
   5   4  -5   22.28    1.51
   5   4  -5   21.97    1.20
  -5   4   5   22.55    1.45
   5   4  -5   21.91    1.20
  -5   4   5   20.73    1.45
  -5   4   5   22.47    1.26
  -5  -4   5   20.70    1.19
   5  -4  -5   23.85    1.19
  -5  -4   5   21.49    1.19
  -5  -4   5   23.48    1.52
   5  -4  -5   20.40    1.47
   5  -4  -5   21.81    1.18
   6   4  -5   13.38    0.98
   6   4  -5   12.08    0.75
  -6   4   5   13.20    0.89
   6   4  -5   11.65    0.75
  -6   4   5   11.37    0.79
   6  -4  -5   13.25    0.74
  -6  -4   5   13.94    0.98
   6  -4  -5   12.78    0.74
   7   4  -5    4.20    0.57
  -7   4   5    4.33    0.42
  -7   4   5    3.76    0.38
   7  -4  -5    3.96    0.38
  -7  -4   5    4.88    0.56
   7  -4  -5    3.61    0.38
  -7   5  -5    1.57    0.23
   7   5   5    1.50    0.34
  -7   5  -5    1.32    0.22
  -7  -5  -5    1.76    0.33
   7  -5   5    1.09    0.20
   7  -5   5    1.27    0.21
  -6   5  -5    1.34    0.21
  -6   5  -5    1.17    0.19
   6   5   5    1.03    0.30
   6  -5   5    1.46    0.19
   6  -5   5    1.44    0.19
  -6  -5  -5    1.56    0.31
  -5   5  -5    0.49    0.14
   5   5   5    0.34    0.17
   5   5   5    0.97    0.22
  -5   5  -5    0.35    0.12
   5   5   5    0.30    0.13
  -5   5  -5   -0.01    0.15
  -5  -5  -5    0.16    0.11
   5  -5   5    0.19    0.11
  -5  -5  -5    0.34    0.19
   5  -5   5    0.20    0.10
  -5  -5  -5    0.20    0.12
   5  -5   5    0.79    0.17
  -5  -5  -5    0.69    0.18
  -4   5  -5   36.14    2.26
   4   5   5   35.52    2.30
  -4   5  -5   36.79    2.26
   4   5   5   35.01    1.84
   4   5   5   33.93    1.84
   4   5   5   31.27    2.29
  -4   5  -5   33.30    1.95
   4  -5   5   34.83    1.83
   4  -5   5   39.01    1.83
  -4  -5  -5   35.73    2.30
  -4  -5  -5   35.66    1.84
  -4  -5  -5   30.92    2.29
   4  -5   5   34.23    2.27
  -3   5  -5    4.76    0.33
   3   5   5    5.50    0.39
   3   5   5    4.11    0.36
   3   5   5    3.76    0.28
   3   5   5    4.13    0.29
  -3   5  -5    3.71    0.31
  -3   5  -5    4.55    0.33
  -3  -5  -5    4.63    0.38
   3  -5   5    4.28    0.34
  -3  -5  -5    4.78    0.37
  -3  -5  -5    4.38    0.29
   3  -5   5    4.23    0.33
  -3  -5  -5    4.23    0.30
   3  -5   5    3.96    0.27
   3  -5   5    4.40    0.27
  -2   5  -5    1.82    0.18
  -2   5  -5    2.12    0.18
   2   5   5    1.99    0.21
   2  -5   5    2.15    0.15
  -2  -5  -5    2.00    0.23
   2  -5   5    1.99    0.19
   2  -5   5    1.99    0.20
  -1   5  -5   87.51    5.58
   1   5   5   92.08    5.59
   1   5   5   87.34    4.49
   1   5   5   86.47    4.49
  -1   5  -5   88.37    5.58
  -1  -5  -5   84.66    4.50
   1  -5   5   83.15    5.58
  -1  -5  -5   84.74    5.59
   1  -5   5   88.09    5.59
   1  -5   5   87.97    4.49
  -1  -5  -5   87.57    5.59
   1  -5   5   88.72    4.49
   0   5  -5   25.16    1.32
   0   5  -5   25.19    1.65
   0   5  -5   26.04    1.32
   0   5   5   25.22    1.64
   0   5  -5   26.83    1.65
   0  -5  -5   24.41    1.65
   0  -5   5   23.57    1.65
   0  -5   5   25.24    1.33
   0  -5  -5   25.65    1.32
   0  -5   5   25.63    1.33
   0  -5   5   25.25    1.65
   0  -5  -5   25.27    1.32
   0  -5  -5   26.89    1.65
  -1   5   5   22.09    1.36
   1   5  -5   20.77    1.39
  -1   5   5   21.67    1.36
   1   5  -5   21.69    1.11
   1   5  -5   20.70    1.11
  -1  -5   5   21.32    1.39
   1  -5  -5   21.58    1.37
  -1  -5   5   21.32    1.11
  -1  -5   5   19.68    1.39
   1  -5  -5   20.06    1.37
   1  -5  -5   21.61    1.10
   2   5  -5   30.75    1.65
   2   5  -5   32.39    2.05
   2   5  -5   32.25    1.65
   2   5  -5   30.95    2.05
   2  -5  -5   32.84    2.03
  -2  -5   5   29.78    2.05
  -2  -5   5   31.89    2.05
   2  -5  -5   28.95    2.02
   2  -5  -5   31.14    1.62
   2  -5  -5   32.11    1.62
  -2  -5   5   32.33    1.65
  -2  -5   5   31.59    1.65
  -3   5   5    1.07    0.13
   3   5  -5    0.93    0.16
   3   5  -5    1.57    0.20
   3   5  -5    0.75    0.11
   3  -5  -5    1.18    0.16
   3  -5  -5    0.94    0.09
  -3  -5   5    1.01    0.17
  -3  -5   5    1.18    0.16
  -3  -5   5    0.83    0.11
   3  -5  -5    0.98    0.10
   4   5  -5   29.12    1.90
  -4   5   5   29.12    1.84
   4   5  -5   28.96    1.52
  -4   5   5   28.40    1.58
  -4   5   5   29.51    1.84
   4   5  -5   25.98    1.89
  -4  -5   5   29.02    1.90
   4  -5  -5   28.67    1.86
  -4  -5   5   28.24    1.52
  -4  -5   5   27.74    1.52
  -4  -5   5   25.10    1.88
   4  -5  -5   30.85    1.50
   4  -5  -5   29.01    1.49
  -5   5   5    0.19    0.12
   5   5  -5    0.24    0.12
   5   5  -5    0.03    0.10
   5   5  -5    0.40    0.20
  -5   5   5    0.31    0.11
   5  -5  -5    0.36    0.14
  -5  -5   5    0.22    0.15
   5  -5  -5    0.30    0.11
   5  -5  -5    0.25    0.10
  -5  -5   5    0.33    0.19
  -5  -5   5    0.22    0.11
  -5  -5   5    0.24    0.12
  -6   5   5   -0.07    0.13
  -6   5   5    0.15    0.11
  -6   5   5    0.08    0.13
   6   5  -5    0.14    0.22
  -6  -5   5    0.20    0.23
   6  -5  -5    0.07    0.13
   6  -5  -5    0.10    0.13
   7   5  -5    0.73    0.29
  -7   5   5    0.76    0.17
  -7   5   5    0.66    0.15
   7  -5  -5    0.36    0.17
   7  -5  -5    0.60    0.18
  -7  -5   5    0.70    0.28
  -7   6  -5    8.68    0.60
  -7   6  -5    7.42    0.59
   7   6   5    8.31    0.78
  -7  -6  -5    8.34    0.76
   7  -6   5    7.97    0.55
   7  -6   5    7.17    0.54
   6   6   5    7.73    0.71
  -6   6  -5    7.86    0.56
  -6   6  -5    7.35    0.56
  -6  -6  -5    7.21    0.69
   6  -6   5    7.35    0.49
   6  -6   5    7.78    0.49
  -5   6  -5   36.60    2.18
   5   6   5   31.56    1.79
   5   6   5   28.98    2.22
   5   6   5   37.18    2.25
  -5   6  -5   31.06    1.90
   5   6   5   32.82    1.79
  -5   6  -5   34.64    2.18
  -5  -6  -5   28.14    2.22
  -5  -6  -5   31.62    1.79
  -5  -6  -5   37.47    2.26
  -5  -6  -5   33.16    1.79
   5  -6   5   33.91    1.77
   5  -6   5   38.01    1.78
   5  -6   5   33.47    2.20
   4   6   5    2.85    0.34
   4   6   5    3.25    0.27
  -4   6  -5    3.17    0.30
   4   6   5    4.03    0.40
  -4   6  -5    3.49    0.28
  -4   6  -5    3.71    0.29
   4   6   5    3.31    0.27
  -4  -6  -5    3.31    0.34
  -4  -6  -5    3.27    0.37
  -4  -6  -5    3.33    0.27
   4  -6   5    3.51    0.32
   4  -6   5    3.46    0.25
   4  -6   5    3.58    0.25
   3   6   5   36.14    1.96
   3   6   5   34.04    1.96
  -3   6  -5   40.09    2.41
   3   6   5   43.21    2.46
   3   6   5   35.09    2.44
  -3   6  -5   38.72    2.41
   3  -6   5   38.96    1.95
  -3  -6  -5   35.49    1.96
  -3  -6  -5   38.73    2.45
  -3  -6  -5   36.90    1.97
   3  -6   5   35.94    2.42
  -3  -6  -5   37.23    2.45
   3  -6   5   35.43    1.95
   3  -6   5   37.83    2.09
   2   6   5   18.15    0.95
   2   6   5   18.10    0.95
  -2   6  -5   17.47    1.15
  -2   6  -5   18.28    1.16
   2   6   5   14.97    1.18
   2   6   5   17.42    1.19
  -2  -6  -5   17.92    0.95
   2  -6   5   17.52    1.17
  -2  -6  -5   15.52    1.18
   2  -6   5   19.04    1.03
   2  -6   5   17.95    0.93
   2  -6   5   19.71    0.94
  -2  -6  -5   18.12    0.95
  -2  -6  -5   18.56    1.19
  -1   6  -5   11.93    0.76
   1   6   5   11.34    0.77
  -1   6  -5   11.88    0.76
   1   6   5   11.37    0.77
   1   6   5   11.91    0.61
   1   6   5   11.83    0.61
  -1  -6  -5    9.97    0.77
   1  -6   5   10.63    0.77
  -1  -6  -5   11.58    0.62
   1  -6   5   11.53    0.61
  -1  -6  -5   11.52    0.78
   1  -6   5   11.74    0.61
   1  -6   5   11.55    0.77
  -1  -6  -5   11.85    0.62
   0   6  -5   63.26    3.36
   0   6  -5   69.97    4.20
   0   6   5   73.87    4.18
   0   6  -5   63.48    3.36
   0   6   5   68.57    4.19
   0   6  -5   65.65    4.19
   0  -6  -5   61.82    3.37
   0  -6  -5   71.57    4.19
   0  -6   5   63.50    3.37
   0  -6   5   64.96    4.20
   0  -6   5   62.19    3.37
   0  -6  -5   61.73    3.37
   0  -6  -5   58.56    4.19
   0  -6   5   66.19    4.20
   1   6  -5  126.57    6.52
   1   6  -5  127.05    8.11
   1   6  -5  131.69    6.52
  -1  -6   5  127.66    6.52
   1  -6  -5  132.78    6.51
  -1  -6   5  126.99    8.11
   1  -6  -5  128.45    8.10
  -1  -6   5  120.36    8.10
   1  -6  -5  119.04    8.09
   2   6  -5   32.69    1.77
   2   6  -5   34.20    1.77
   2   6  -5   33.97    2.20
   2   6  -5   31.24    2.20
  -2  -6   5   34.25    1.77
  -2  -6   5   34.08    1.77
  -2  -6   5   34.03    2.21
   2  -6  -5   34.76    1.84
  -2  -6   5   31.14    2.20
   2  -6  -5   34.68    2.17
   2  -6  -5   35.44    1.74
   2  -6  -5   34.38    1.74
   3   6  -5    8.53    0.48
   3   6  -5    6.70    0.60
   3   6  -5    7.07    0.59
   3   6  -5    8.16    0.47
   3  -6  -5    7.11    0.55
  -3  -6   5    7.74    0.60
  -3  -6   5    8.64    0.48
   3  -6  -5    8.89    0.44
  -3  -6   5    8.28    0.48
   3  -6  -5    8.80    0.44
  -4   6   5   44.97    2.55
   4   6  -5   44.83    2.44
   4   6  -5   46.53    2.44
   4   6  -5   42.29    3.03
   4   6  -5   50.70    3.05
  -4  -6   5   45.99    2.44
   4  -6  -5   47.30    2.41
   4  -6  -5   48.20    3.01
  -4  -6   5   47.73    3.05
   4  -6  -5   49.88    2.42
  -4  -6   5   42.89    3.03
  -5   6   5   11.62    0.75
   5   6  -5   15.13    0.95
   5   6  -5   10.02    0.89
   5   6  -5   12.19    0.72
  -5  -6   5   13.26    0.93
  -5  -6   5   11.80    0.72
   5  -6  -5   12.67    0.70
  -5  -6   5   11.43    0.90
  -5  -6   5   11.49    0.72
   5  -6  -5   13.61    0.87
   5  -6  -5   13.81    0.70
  -6   6   5   25.24    1.66
   6   6  -5   31.73    2.01
   6  -6  -5   30.36    1.57
   6  -6  -5   28.15    1.56
  -6  -6   5   30.85    2.01
   7   6  -5    4.60    0.57
   7  -6  -5    3.78    0.37
  -7  -6   5    4.50    0.57
   7  -6  -5    3.62    0.37
   7   7   5   10.40    0.87
  -7  -7  -5   10.03    0.85
   7  -7   5    8.05    0.60
   7  -7   5    9.28    0.61
   6   7   5   14.69    1.10
  -6  -7  -5   14.51    1.09
   6  -7   5   13.24    0.82
   6  -7   5   14.83    0.82
   5   7   5    8.79    0.57
   5   7   5    8.63    0.56
  -5   7  -5   10.18    0.62
   5   7   5   10.30    0.76
  -5  -7  -5    9.18    0.57
  -5  -7  -5    7.92    0.72
   5  -7   5    8.72    0.54
  -5  -7  -5    7.73    0.56
  -5  -7  -5   10.45    0.76
   5  -7   5   10.22    0.55
   5  -7   5    9.17    0.68
   4   7   5   20.60    1.51
   4   7   5   22.01    1.21
   4   7   5   25.05    1.54
   4   7   5   21.23    1.21
  -4  -7  -5   22.84    1.22
   4  -7   5   24.35    1.19
  -4  -7  -5   19.72    1.52
   4  -7   5   22.50    1.20
  -4  -7  -5   22.02    1.22
   4  -7   5   23.14    1.30
  -4  -7  -5   23.70    1.54
   3   7   5    4.65    0.30
   3   7   5    3.74    0.37
   3   7   5    4.41    0.29
   3   7   5    3.75    0.40
   3  -7   5    4.30    0.34
   3  -7   5    4.97    0.35
  -3  -7  -5    4.10    0.39
   3  -7   5    4.96    0.27
   3  -7   5    4.86    0.27
  -3  -7  -5    5.28    0.31
  -3  -7  -5    4.27    0.31
  -3  -7  -5    3.32    0.37
  -2   7  -5   27.25    1.76
   2   7   5   27.24    1.44
   2   7   5   27.58    1.44
   2   7   5   26.87    1.80
  -2   7  -5   27.00    1.76
   2  -7   5   28.81    1.43
   2  -7   5   25.93    1.78
  -2  -7  -5   27.13    1.45
  -2  -7  -5   26.55    1.80
   2  -7   5   27.14    1.43
  -2  -7  -5   28.41    1.45
   2  -7   5   29.46    1.55
   1   7   5  363.46   22.12
   1   7   5  337.62   17.72
  -1   7  -5  350.76   22.04
   1   7   5  341.81   17.73
  -1   7  -5  347.75   22.03
   1   7   5  328.16   22.07
  -1  -7  -5  352.43   17.76
   1  -7   5  341.30   17.73
   1  -7   5  352.82   17.75
  -1  -7  -5  352.72   22.07
  -1  -7  -5  346.70   17.76
  -1  -7  -5  315.91   21.99
   1  -7   5  348.02   22.08
   0   7  -5   35.45    2.26
   0   7   5   33.42    2.25
   0   7  -5   33.88    2.26
   0   7  -5   35.94    1.80
   0   7  -5   35.56    1.80
   0   7   5   31.24    2.25
   0  -7   5   35.21    2.27
   0  -7   5   37.71    1.82
   0  -7  -5   35.67    1.81
   0  -7  -5   34.05    2.26
   0  -7  -5   38.40    1.81
   0  -7   5   29.99    2.26
   0  -7   5   38.53    1.82
   1   7  -5  115.47    5.59
   1   7  -5  111.11    5.59
   1   7  -5  103.09    6.95
   1   7  -5  107.65    6.95
  -1  -7   5  110.92    6.96
  -1  -7   5  115.36    5.59
   1  -7  -5  114.90    5.57
  -1  -7   5   96.87    6.95
   1  -7  -5  102.82    6.93
   1  -7  -5  106.79    6.93
   2   7  -5    0.23    0.07
   2   7  -5    0.25    0.11
   2   7  -5    0.25    0.07
   2   7  -5    0.20    0.12
  -2  -7   5    0.20    0.10
  -2  -7   5    0.20    0.11
  -2  -7   5    0.47    0.10
   2  -7  -5    0.39    0.07
   2  -7  -5    0.25    0.07
  -2  -7   5    0.14    0.07
   3   7  -5   34.13    2.39
   3   7  -5   37.45    2.41
   3   7  -5   37.83    1.92
  -3  -7   5   39.06    1.93
   3  -7  -5   38.85    1.89
  -3  -7   5   37.40    1.93
   3  -7  -5   38.65    1.89
  -3  -7   5   30.86    2.39
   3  -7  -5   34.79    2.36
  -3  -7   5   36.61    2.40
   4   7  -5   28.60    1.81
   4   7  -5   26.33    1.43
   4   7  -5   26.43    1.44
   4   7  -5   24.02    1.78
  -4  -7   5   26.66    1.44
   4  -7  -5   29.46    1.41
   4  -7  -5   27.85    1.40
  -4  -7   5   23.83    1.78
  -4  -7   5   27.48    1.80
   4  -7  -5   26.89    1.75
   5   7  -5    6.99    0.67
  -5   7   5    7.80    0.53
   5   7  -5    8.12    0.53
   5   7  -5    8.09    0.52
   5   7  -5    9.43    0.71
   5  -7  -5    9.29    0.50
  -5  -7   5    7.96    0.52
  -5  -7   5    7.95    0.52
  -5  -7   5    9.78    0.71
   5  -7  -5    8.00    0.61
   5  -7  -5    8.87    0.49
  -6   7   5    0.95    0.18
   6   7  -5    0.58    0.27
   6  -7  -5    1.20    0.17
   6  -7  -5    0.98    0.16
  -6  -7   5    0.92    0.28
   7   7  -5    0.99    0.31
   7  -7  -5    0.85    0.18
  -7  -7   5    0.65    0.30
   7  -7  -5    0.92    0.19
   6   8   5    2.04    0.36
   6  -8   5    2.60    0.28
  -6  -8  -5    2.37    0.37
   6  -8   5    2.62    0.28
   5   8   5    3.17    0.46
   5   8   5    2.74    0.29
   5  -8   5    3.23    0.26
   5  -8   5    3.54    0.27
  -5  -8  -5    2.69    0.29
  -5  -8  -5    3.16    0.44
   4   8   5   81.55    4.39
   4   8   5   73.59    5.45
   4   8   5   77.71    4.38
   4   8   5   91.10    5.47
   4  -8   5   93.07    4.37
  -4  -8  -5   81.75    4.39
   4  -8   5   90.25    4.64
   4  -8   5   84.40    4.37
  -4  -8  -5   89.00    5.48
  -4  -8  -5   82.86    4.39
   3   8   5   56.12    3.96
   3   8   5   58.30    3.18
   3   8   5   60.74    3.18
   3   8   5   62.97    3.97
   3  -8   5   62.11    3.17
  -3  -8  -5   63.18    3.19
   3  -8   5   63.67    3.38
  -3  -8  -5   60.48    3.97
  -3  -8  -5   63.30    3.20
   3  -8   5   57.02    3.94
   3  -8   5   66.03    3.17
   2   8   5   46.50    2.51
   2   8   5   46.72    2.51
   2   8   5   47.53    3.14
   2  -8   5   51.43    2.68
   2  -8   5   50.21    2.50
   2  -8   5   48.98    2.50
  -2  -8  -5   47.74    3.14
   2  -8   5   45.93    3.12
  -2  -8  -5   50.58    2.53
  -2  -8  -5   48.42    2.52
   1   8   5   28.68    1.92
   1   8   5   32.85    1.93
  -1   8  -5   29.90    1.90
   1   8   5   28.04    1.53
  -1   8  -5   30.58    1.90
   1   8   5   28.03    1.53
   1  -8   5   30.32    1.92
   1  -8   5   29.25    1.54
  -1  -8  -5   27.76    1.55
  -1  -8  -5   29.58    1.55
  -1  -8  -5   30.56    1.94
   1  -8   5   29.96    1.54
   0   8  -5   70.27    4.54
   0   8  -5   70.87    4.53
   0   8   5   71.82    4.52
   0   8   5   68.69    4.52
   0  -8   5   71.62    4.54
   0  -8  -5   69.51    3.64
   0  -8  -5   70.04    4.53
   0  -8   5   69.93    3.65
   0  -8  -5   73.48    3.64
   0  -8   5   70.90    3.65
   1   8  -5   64.44    3.23
   1   8  -5   59.65    4.02
   1   8  -5   60.85    4.03
   1   8  -5   62.98    3.23
   1  -8  -5   69.04    3.21
   1  -8  -5   62.27    3.21
  -1  -8   5   61.07    4.03
   1  -8  -5   58.29    4.01
  -1  -8   5   64.44    3.24
   2   8  -5   58.24    3.08
   2   8  -5   56.57    3.08
   2   8  -5   61.38    3.84
  -2  -8   5   60.65    3.09
   2  -8  -5   57.50    3.80
  -2  -8   5   58.44    3.84
   2  -8  -5   62.61    3.23
  -2  -8   5   59.98    3.09
   3   8  -5    6.35    0.39
   3   8  -5    6.66    0.40
   3   8  -5    5.83    0.50
   3   8  -5    6.75    0.53
  -3  -8   5    6.66    0.52
  -3  -8   5    6.51    0.41
  -3  -8   5    7.05    0.41
   3  -8  -5    5.91    0.44
   4   8  -5    7.84    0.59
   4   8  -5    6.29    0.42
   4   8  -5    6.06    0.54
   4  -8  -5    6.68    0.38
   4  -8  -5    6.72    0.38
   4  -8  -5    7.20    0.48
  -4  -8   5    6.17    0.43
  -4  -8   5    6.77    0.57
  -4  -8   5    6.14    0.43
   5   8  -5   27.04    1.59
   5   8  -5   32.34    2.02
   5  -8  -5   30.32    1.56
   5  -8  -5   27.87    1.94
  -5  -8   5   27.24    1.59
   5  -8  -5   31.11    1.56
  -5  -8   5   30.84    2.01
   6   8  -5    7.48    0.71
  -6  -8   5    7.24    0.70
   6  -8  -5    7.39    0.47
   6  -8  -5    7.66    0.48
   6   9   5    3.96    0.55
   6  -9   5    2.90    0.31
   6  -9   5    3.26    0.32
  -6  -9  -5    4.12    0.53
   5   9   5    0.94    0.25
   5  -9   5    0.42    0.12
   5  -9   5    0.44    0.12
  -5  -9  -5    0.56    0.23
   4   9   5    3.96    0.42
   4   9   5    2.45    0.24
   4   9   5    2.50    0.33
   4  -9   5    2.78    0.27
  -4  -9  -5    2.10    0.20
   4  -9   5    3.48    0.23
   4  -9   5    2.80    0.32
  -4  -9  -5    2.49    0.28
  -4  -9  -5    2.88    0.37
   4  -9   5    3.09    0.22
   3   9   5    2.25    0.20
   3   9   5    2.55    0.33
  -3  -9  -5    2.42    0.31
   3  -9   5    2.53    0.29
   3  -9   5    2.50    0.23
   3  -9   5    2.53    0.19
  -3  -9  -5    2.73    0.25
   3  -9   5    2.79    0.19
  -3  -9  -5    2.56    0.24
   2   9   5    4.76    0.28
   2   9   5    3.65    0.36
   2  -9   5    5.22    0.37
   2  -9   5    4.91    0.27
  -2  -9  -5    4.38    0.30
   2  -9   5    5.00    0.27
  -2  -9  -5    4.05    0.39
   2  -9   5    3.96    0.34
  -2  -9  -5    4.79    0.31
  -1   9  -5   43.61    2.77
   1   9   5   42.58    2.79
  -1   9  -5   44.17    2.77
   1   9   5   42.02    2.79
  -1  -9  -5   41.20    2.25
   1  -9   5   41.30    2.79
  -1  -9  -5   44.17    2.80
   1  -9   5   45.31    2.24
  -1  -9  -5   44.82    2.25
   1  -9   5   43.26    2.24
   0   9  -5   35.46    2.29
   0   9  -5   32.54    2.30
   0   9   5   32.01    2.28
   0   9   5   33.76    2.28
   0  -9   5   35.35    2.31
   0  -9  -5   34.59    2.30
   0  -9  -5   40.11    1.85
   0  -9   5   37.99    1.86
   0  -9   5   36.61    1.85
   0  -9  -5   37.11    1.85
   1   9  -5   15.53    0.87
   1   9  -5   15.95    1.10
   1   9  -5   16.76    1.12
  -1  -9   5   17.31    0.90
   1  -9  -5   16.73    1.09
   1  -9  -5   16.42    0.86
  -1  -9   5   16.43    0.89
  -1  -9   5   16.92    1.12
   1  -9  -5   17.11    0.86
   2   9  -5   12.32    0.68
   2   9  -5   12.88    0.87
   2   9  -5   11.47    0.67
   2  -9  -5   12.04    0.81
  -2  -9   5   12.19    0.69
   2  -9  -5   12.86    0.71
  -2  -9   5   12.08    0.86
  -2  -9   5   12.67    0.69
   3   9  -5   16.32    1.25
   3   9  -5   17.81    1.27
   3   9  -5   17.39    1.00
   3   9  -5   17.97    1.00
   3  -9  -5   19.88    1.04
  -3  -9   5   19.94    1.02
  -3  -9   5   18.78    1.27
  -3  -9   5   19.62    1.02
   4   9  -5    0.33    0.21
   4   9  -5    0.51    0.12
   4   9  -5    0.52    0.18
  -4  -9   5    0.60    0.20
  -4  -9   5    0.53    0.12
  -4  -9   5    0.60    0.14
   4  -9  -5    0.63    0.08
   4  -9  -5    0.56    0.08
   5   9  -5    8.49    0.74
   5   9  -5    7.55    0.54
  -5  -9   5    9.02    0.72
   5  -9  -5    8.64    0.50
   5  -9  -5    9.23    0.50
   6   9  -5    3.52    0.44
   6  -9  -5    3.36    0.30
   6  -9  -5    3.09    0.29
  -6  -9   5    3.47    0.51
   6  10   5    1.33    0.34
  -6 -10  -5    1.41    0.33
   6 -10   5    1.19    0.17
   6 -10   5    1.21    0.18
   5  10   5   15.87    1.07
  -5 -10  -5   14.61    1.06
   5 -10   5   12.42    0.77
   5 -10   5   13.37    0.77
   4  10   5    1.04    0.15
   4  10   5    1.99    0.28
   4  10   5    1.65    0.24
  -4 -10  -5    1.44    0.25
   4 -10   5    1.33    0.20
  -4 -10  -5    1.15    0.18
   4 -10   5    1.44    0.23
   4 -10   5    1.35    0.14
  -4 -10  -5    1.36    0.19
   4 -10   5    1.44    0.17
  -3 -10  -5   15.32    0.88
  -3 -10  -5   17.14    1.11
   3 -10   5   16.23    0.84
  -3 -10  -5   15.98    0.88
   3 -10   5   14.86    1.05
   3 -10   5   15.33    0.95
   3 -10   5   15.17    0.84
   2  10   5    8.14    0.65
   2  10   5    7.76    0.66
  -2 -10  -5    9.16    0.54
  -2 -10  -5    8.50    0.67
   2 -10   5    8.58    0.63
   2 -10   5   10.39    0.61
  -2 -10  -5   10.02    0.54
   2 -10   5    9.93    0.50
   2 -10   5   10.10    0.50
   1  10   5    0.09    0.10
   1  10   5    0.00    0.08
   1 -10   5    0.04    0.06
  -1 -10  -5   -0.02    0.07
  -1 -10  -5   -0.04    0.08
   1 -10   5    0.12    0.09
   1 -10   5    0.07    0.06
  -1 -10  -5   -0.01    0.10
   0  10  -5   11.72    0.75
   0  10  -5   11.95    0.75
   0 -10  -5   12.18    0.76
   0 -10  -5   10.37    0.60
   0 -10   5    9.82    0.60
   0 -10  -5   10.14    0.60
   0 -10   5   11.14    0.76
   0 -10   5   11.03    0.61
   1  10  -5   44.84    2.95
   1  10  -5   48.82    2.96
  -1 -10   5   45.37    2.96
   1 -10  -5   43.89    2.93
   1 -10  -5   45.63    2.35
  -1 -10   5   45.57    2.38
   1 -10  -5   46.93    2.35
  -1 -10   5   43.52    2.38
   2  10  -5    1.37    0.19
   2  10  -5    0.70    0.15
   2  10  -5    0.31    0.08
  -2 -10   5    0.23    0.10
   2 -10  -5    0.37    0.10
  -2 -10   5    0.28    0.10
  -2 -10   5    0.68    0.16
   3  10  -5    6.24    0.50
   3  10  -5    4.59    0.34
  -3 -10   5    5.23    0.38
  -3 -10   5    5.25    0.37
  -3 -10   5    5.68    0.49
   3 -10  -5    5.98    0.36
   4  10  -5    4.97    0.46
   4  10  -5    3.10    0.28
   4 -10  -5    3.54    0.22
   4 -10  -5    3.52    0.22
  -4 -10   5    3.70    0.31
  -4 -10   5    2.89    0.29
  -4 -10   5    3.89    0.43
   5  10  -5    0.46    0.25
   5 -10  -5    0.10    0.09
   5 -10  -5    0.17    0.09
  -5 -10   5    0.08    0.21
   6  10  -5    5.87    0.63
   6 -10  -5    4.59    0.36
   6 -10  -5    4.19    0.35
  -6 -10   5    5.15    0.59
   6  11   5   10.18    0.84
   6 -11   5    8.73    0.56
  -6 -11  -5    9.28    0.82
   6 -11   5    8.38    0.56
   5  11   5   33.47    2.00
   5 -11   5   26.35    1.53
   5 -11   5   29.40    1.53
  -5 -11  -5   28.64    1.99
   5 -11   5   26.79    1.67
   4  11   5   39.24    2.39
  -4 -11  -5   36.58    2.39
   4 -11   5   33.08    1.86
   4 -11   5   37.50    1.86
  -4 -11  -5   33.91    1.90
   4 -11   5   35.63    2.03
  -4 -11  -5   33.28    1.90
   3  11   5    1.30    0.21
   3  11   5    2.38    0.27
  -3 -11  -5    1.67    0.19
  -3 -11  -5    1.48    0.18
   3 -11   5    1.42    0.15
   3 -11   5    2.06    0.25
   3 -11   5    1.62    0.19
   3 -11   5    1.76    0.16
  -3 -11  -5    1.90    0.26
   2  11   5    3.01    0.30
   2  11   5    3.05    0.33
   2 -11   5    2.84    0.26
   2 -11   5    3.54    0.20
   2 -11   5    2.95    0.32
  -2 -11  -5    3.02    0.32
  -2 -11  -5    2.80    0.25
   2 -11   5    2.95    0.20
  -2 -11  -5    2.74    0.25
   1  11   5   40.32    2.38
   1  11   5   37.78    2.37
  -1 -11  -5   35.83    1.92
   1 -11   5   35.63    2.38
  -1 -11  -5   33.56    1.92
  -1 -11  -5   36.97    2.39
   1 -11   5   37.96    1.91
   1 -11   5   34.85    1.90
   0  11  -5   22.83    1.47
   0  11  -5   22.54    1.47
   0 -11   5   21.69    1.19
   0 -11   5   21.89    1.49
   0 -11  -5   23.20    1.19
   0 -11  -5   21.83    1.19
   0 -11   5   23.74    1.20
   0 -11  -5   22.51    1.48
   1  11  -5    0.40    0.12
   1  11  -5    0.57    0.14
  -1 -11   5    0.31    0.10
   1 -11  -5    0.53    0.10
   1 -11  -5    0.42    0.06
  -1 -11   5    0.44    0.14
  -1 -11   5    0.36    0.10
   1 -11  -5    0.36    0.06
   2  11  -5  102.93    5.85
   2  11  -5   87.56    5.83
   2 -11  -5   90.08    4.93
  -2 -11   5   84.36    4.70
  -2 -11   5   89.97    5.85
  -2 -11   5   89.50    4.70
   3  11  -5    3.31    0.38
   3 -11  -5    2.97    0.25
  -3 -11   5    3.33    0.37
  -3 -11   5    2.60    0.27
  -3 -11   5    2.66    0.26
   4  11  -5   35.72    2.14
  -4 -11   5   29.06    1.70
  -4 -11   5   29.25    1.70
  -4 -11   5   32.75    2.14
   5  11  -5    9.26    0.78
   5 -11  -5    8.83    0.50
   5 -11  -5    8.57    0.50
  -5 -11   5    8.41    0.76
   6  11  -5   -0.15    0.28
   6 -11  -5   -0.09    0.11
  -6 -11   5   -0.26    0.24
   6 -11  -5   -0.04    0.12
   5  12   5    4.56    0.59
   5 -12   5    4.63    0.34
   5 -12   5    5.27    0.34
  -5 -12  -5    4.32    0.57
   5 -12   5    4.85    0.47
   4  12   5   37.50    2.32
   4 -12   5   32.74    1.80
  -4 -12  -5   34.19    2.32
  -4 -12  -5   31.58    1.85
  -4 -12  -5   32.57    1.85
   4 -12   5   36.47    1.98
   4 -12   5   36.28    1.80
   3  12   5    2.82    0.38
   3  12   5    2.41    0.31
   3 -12   5    3.56    0.34
  -3 -12  -5    2.79    0.28
  -3 -12  -5    2.77    0.28
  -3 -12  -5    3.03    0.37
   3 -12   5    3.05    0.21
   3 -12   5    3.05    0.21
   2  12   5   34.18    2.38
   2  12   5   36.83    2.39
   2 -12   5   38.94    2.06
   2 -12   5   32.84    2.36
  -2 -12  -5   37.51    1.93
  -2 -12  -5   35.53    2.40
   2 -12   5   38.61    1.89
  -2 -12  -5   35.99    1.93
   2 -12   5   37.25    1.89
   1  12   5   12.15    0.82
   1  12   5   11.58    0.81
  -1 -12  -5   11.78    0.84
   1 -12   5   11.04    0.81
  -1 -12  -5   12.53    0.67
   1 -12   5   12.42    0.66
   1 -12   5   11.99    0.65
  -1 -12  -5   12.10    0.67
   0  12  -5   18.73    1.24
   0  12  -5   19.66    1.25
   0 -12  -5   18.51    1.01
   0 -12   5   18.27    1.02
   0 -12  -5   19.51    1.01
   0 -12   5   19.89    1.02
   0 -12   5   18.84    1.27
   0 -12  -5   18.49    1.26
   1  12  -5  121.15    7.87
   1  12  -5  122.51    7.86
   1 -12  -5  131.04    6.31
  -1 -12   5  119.59    6.34
   1 -12  -5  120.82    6.31
  -1 -12   5  121.06    7.88
  -1 -12   5  131.63    6.34
   1 -12  -5  114.71    7.85
   2  12  -5   62.93    3.95
   2  12  -5   56.97    3.94
  -2 -12   5   61.58    3.18
  -2 -12   5   60.60    3.96
   2 -12  -5   63.46    3.33
  -2 -12   5   59.74    3.18
   3  12  -5    9.24    0.75
   3  12  -5   10.42    0.79
  -3 -12   5   10.78    0.62
  -3 -12   5    9.71    0.62
  -3 -12   5   10.14    0.79
   3 -12  -5   11.28    0.63
   4  12  -5    0.19    0.22
  -4 -12   5    0.19    0.20
  -4 -12   5    0.02    0.12
  -4 -12   5   -0.01    0.14
   5  12  -5   24.12    1.67
   5 -12  -5   23.79    1.24
  -5 -12   5   22.96    1.66
   5 -12  -5   23.22    1.24
   5  13   5   17.06    1.24
   5 -13   5   15.54    0.90
   5 -13   5   16.29    1.05
   5 -13   5   17.01    0.90
   4  13   5    1.81    0.31
   4 -13   5    1.62    0.18
   4 -13   5    1.57    0.19
   4 -13   5    1.90    0.28
  -4 -13  -5    1.64    0.23
   3  13   5    1.59    0.26
   3  13   5    1.44    0.22
  -3 -13  -5    1.11    0.18
  -3 -13  -5    1.16    0.18
   3 -13   5    1.31    0.13
   3 -13   5    1.20    0.23
   3 -13   5    1.45    0.16
  -3 -13  -5    1.52    0.25
   2  13   5   35.09    2.58
   2  13   5   37.00    2.59
  -2 -13  -5   38.60    2.10
  -2 -13  -5   43.38    2.10
   2 -13   5   41.61    2.06
  -2 -13  -5   36.36    2.61
   2 -13   5   42.53    2.07
   2 -13   5   42.78    2.25
   1  13   5    0.38    0.11
   1  13   5    0.38    0.12
  -1 -13  -5    0.44    0.11
  -1 -13  -5    0.33    0.14
   1 -13   5    0.43    0.10
  -1 -13  -5    0.43    0.12
   1 -13   5    0.40    0.10
   1 -13   5    0.40    0.13
   0  13  -5   20.64    1.36
   0 -13   5   21.41    1.12
   0 -13   5   19.09    1.39
   0 -13   5   22.42    1.12
   0 -13  -5   22.64    1.11
   0 -13  -5   18.61    1.38
   0 -13  -5   21.28    1.11
   1  13  -5    2.97    0.33
   1  13  -5    3.33    0.31
  -1 -13   5    4.20    0.29
  -1 -13   5    3.36    0.35
  -1 -13   5    3.72    0.28
   1 -13  -5    3.72    0.23
   1 -13  -5    3.34    0.22
   2  13  -5    0.64    0.16
   2  13  -5    0.74    0.19
  -2 -13   5    0.81    0.19
  -2 -13   5    0.76    0.14
   2 -13  -5    0.86    0.14
  -2 -13   5    0.69    0.14
   3  13  -5   49.02    3.02
  -3 -13   5   43.28    2.42
  -3 -13   5   45.11    2.42
   3 -13  -5   46.66    2.53
  -3 -13   5   44.83    3.02
   4  13  -5    1.81    0.32
  -4 -13   5    2.17    0.33
   5  13  -5    5.23    0.60
   5 -13  -5    5.04    0.31
   5 -13  -5    4.88    0.31
   4  14   5    7.05    0.66
   4 -14   5    7.56    0.43
   4 -14   5    6.75    0.43
   4 -14   5    7.06    0.58
   3  14   5    3.91    0.39
  -3 -14  -5    2.83    0.32
   3 -14   5    2.68    0.32
  -3 -14  -5    2.93    0.32
   3 -14   5    3.34    0.23
   3 -14   5    2.54    0.23
   2  14   5    4.54    0.40
   2  14   5    3.93    0.37
   2 -14   5    4.25    0.29
  -2 -14  -5    4.38    0.34
   2 -14   5    4.48    0.29
   2 -14   5    4.05    0.42
  -2 -14  -5    4.44    0.34
   1  14   5    1.12    0.15
   1  14   5    1.16    0.17
  -1 -14  -5    1.23    0.15
   1 -14   5    1.43    0.17
  -1 -14  -5    1.35    0.21
   1 -14   5    1.29    0.18
   1 -14   5    1.53    0.18
  -1 -14  -5    1.46    0.16
   0 -14  -5    5.38    0.35
   0 -14   5    5.58    0.36
   0 -14  -5    5.32    0.43
   0 -14  -5    5.44    0.35
   0 -14   5    5.49    0.45
   1  14  -5    5.03    0.46
   1  14  -5    4.88    0.44
  -1 -14   5    6.19    0.40
   1 -14  -5    6.55    0.35
   1 -14  -5    6.22    0.34
  -1 -14   5    6.80    0.40
  -1 -14   5    4.99    0.48
   2  14  -5    2.02    0.28
   2  14  -5    1.86    0.27
  -2 -14   5    2.33    0.27
  -2 -14   5    2.71    0.26
  -2 -14   5    2.53    0.33
   2 -14  -5    2.54    0.26
   3  14  -5    2.25    0.30
  -3 -14   5    1.87    0.23
  -3 -14   5    1.66    0.20
   3 -14  -5    1.70    0.20
   4  14  -5    8.75    0.77
   5  14  -5    0.01    0.26
   5 -14  -5   -0.11    0.08
   5 -14  -5   -0.03    0.08
   4  15   5    0.11    0.24
   4 -15   5    0.02    0.09
   4 -15   5    0.12    0.10
   4 -15   5    0.00    0.20
   3  15   5    0.25    0.20
  -3 -15  -5   -0.01    0.14
   3 -15   5    0.07    0.09
   3 -15   5    0.23    0.09
  -3 -15  -5    0.11    0.16
   3 -15   5    0.18    0.19
   2  15   5    8.11    0.58
  -2 -15  -5    7.45    0.51
   2 -15   5    7.17    0.59
   2 -15   5    7.90    0.46
  -2 -15  -5    7.71    0.51
   2 -15   5    8.05    0.46
  -1 -15  -5    2.71    0.29
   1 -15   5    3.28    0.26
   1 -15   5    2.94    0.26
  -1 -15  -5    3.32    0.28
   0 -15   5    5.10    0.35
   0 -15  -5    4.90    0.33
   0 -15  -5    4.90    0.34
   1  15  -5    1.74    0.20
   1  15  -5    1.40    0.20
  -1 -15   5    1.14    0.17
  -1 -15   5    0.95    0.16
   1 -15  -5    1.25    0.13
   1 -15  -5    1.20    0.13
   2  15  -5    5.18    0.50
   2  15  -5    6.06    0.54
   2 -15  -5    6.99    0.45
  -2 -15   5    6.70    0.44
  -2 -15   5    6.66    0.45
   3  15  -5    4.35    0.47
  -3 -15   5    3.50    0.35
   3 -15  -5    3.90    0.33
  -3 -15   5    3.37    0.36
   4  15  -5    5.06    0.55
   4 -15  -5    3.25    0.34
   3  16   5    6.23    0.52
   3 -16   5    5.13    0.34
   3 -16   5    5.19    0.49
   3 -16   5    5.16    0.34
  -3 -16  -5    4.71    0.43
   2  16   5   16.72    1.07
   2  16   5   14.97    1.05
   2 -16   5   15.36    0.84
   2 -16   5   16.09    0.85
   2 -16   5   15.28    0.99
  -2 -16  -5   13.85    0.88
  -2 -16  -5   15.44    0.89
   1 -16   5    3.06    0.27
  -1 -16  -5    3.04    0.30
  -1 -16  -5    3.24    0.29
   1 -16   5    3.15    0.26
   0 -16  -5   18.81    1.07
   0 -16  -5   20.68    1.08
   0 -16   5   19.33    1.08
   0 -16   5   20.47    1.09
   1  16  -5   25.41    1.73
   1  16  -5   28.36    1.75
   1 -16  -5   27.01    1.40
  -1 -16   5   26.91    1.44
   1 -16  -5   26.19    1.40
  -1 -16   5   25.63    1.44
   2  16  -5    4.51    0.45
   2  16  -5    4.03    0.40
   2 -16  -5    4.52    0.27
   2 -16  -5    4.75    0.27
  -2 -16   5    4.30    0.37
   2 -16  -5    4.38    0.37
  -2 -16   5    4.20    0.38
   3  16  -5    0.05    0.21
   3 -16  -5    0.01    0.14
  -3 -16   5   -0.13    0.15
   2  17   5   26.93    1.74
   2  17   5   24.06    1.73
   2 -17   5   27.95    1.41
  -2 -17  -5   24.17    1.44
   2 -17   5   27.01    1.40
  -2 -17  -5   28.09    1.45
   2 -17   5   26.13    1.57
   1 -17   5    4.43    0.32
  -1 -17  -5    3.80    0.34
  -1 -17  -5    3.86    0.35
   1 -17   5    4.52    0.31
   0 -17  -5   33.33    1.72
   0 -17   5   31.44    1.73
   0 -17   5   33.54    1.74
   0 -17  -5   31.35    1.72
   1 -17  -5    0.18    0.11
   1 -17  -5    0.30    0.10
  -1 -17   5    0.19    0.14
  -1 -17   5    0.26    0.15
   2  17  -5    1.29    0.23
   2  17  -5    0.93    0.19
   2 -17  -5    1.20    0.12
   2 -17  -5    1.20    0.12
  -2 -17   5    1.18    0.20
   2 -17  -5    0.96    0.19
  -2 -17   5    1.13    0.20
   3  17  -5   21.10    1.48
  -1 -18  -5   -0.20    0.14
   1 -18   5   -0.01    0.12
  -1 -18  -5    0.02    0.14
   0 -18  -5    3.61    0.32
   0 -18   5    3.70    0.33
   0 -18  -5    3.50    0.31
   0 -18   5    3.40    0.32
   1 -18  -5    0.28    0.11
   1 -18  -5    0.30    0.12
  -1 -18   5    0.38    0.15
  -1 -18   5    0.32    0.16
  -7   0  -6   15.42    1.14
   6   0   6    2.45    0.29
   6   0   6    3.38    0.41
   6   0   6    2.41    0.29
  -6   0  -6    3.43    0.41
   5   0   6   -0.02    0.15
  -5   0  -6    0.12    0.12
  -5   0  -6    0.07    0.08
   5   0   6    0.01    0.11
  -5   0  -6   -0.04    0.16
   5   0   6    0.11    0.11
  -5   0  -6   -0.03    0.03
  -4   0  -6  259.53   18.51
   4   0   6  306.09   14.90
  -4   0  -6  286.36   15.68
   4   0   6  301.27   18.52
  -4   0  -6  274.72   14.89
  -4   0  -6  302.24   18.63
   4   0   6  294.73   14.90
  -4   0  -6  295.18   14.89
  -3   0  -6  106.87    6.60
  -3   0  -6  106.03    5.31
   3   0   6  102.59    5.31
   3   0   6   96.72    6.60
  -3   0  -6  100.85    6.60
   3   0   6  110.76    6.61
  -3   0  -6   97.60    5.60
   3   0   6  102.41    5.31
  -3   0  -6  102.67    5.31
   2   0   6   57.51    3.86
  -2   0  -6   58.20    3.27
  -2   0  -6   57.79    3.86
   2   0   6   59.80    3.11
   2   0   6   62.09    3.87
  -2   0  -6   61.11    3.10
   2   0   6   60.51    3.11
  -2   0  -6   61.96    3.11
  -2   0  -6   61.19    3.86
   1   0   6   63.83    3.20
   1   0   6   62.27    3.97
   1   0   6   62.80    3.36
   1   0   6   64.46    3.19
  -1   0  -6   62.86    3.19
  -1   0  -6   58.25    3.97
  -1   0  -6   64.23    3.97
   1   0   6   59.71    3.97
  -1   0  -6   57.54    3.36
   0   0  -6    4.11    0.31
   0   0  -6    3.69    0.25
   0   0   6    4.38    0.26
   0   0   6    4.71    0.25
   0   0   6    4.00    0.31
   0   0   6    4.38    0.32
   0   0  -6    4.27    0.32
   0   0  -6    4.61    0.25
  -1   0   6   51.35    3.35
   1   0  -6   52.15    2.69
   1   0  -6   50.21    3.35
  -1   0   6   51.61    3.34
  -1   0   6   51.53    2.69
   1   0  -6   53.06    2.69
   1   0  -6   54.24    3.35
  -2   0   6  104.80    5.21
   2   0  -6   92.79    5.21
   2   0  -6  102.23    5.21
  -2   0   6  108.41    5.21
   2   0  -6   95.48    6.47
  -2   0   6  105.37    6.48
   2   0  -6   98.83    6.47
  -3   0   6   78.67    3.96
  -3   0   6   76.75    4.93
   3   0  -6   80.48    3.97
   3   0  -6   73.10    4.93
   3   0  -6   70.68    4.93
   3   0  -6   80.39    3.97
  -3   0   6   76.91    3.96
  -4   0   6   55.31    2.96
   4   0  -6   57.57    2.97
   4   0  -6   58.75    2.97
  -4   0   6   60.00    3.70
   4   0  -6   54.34    3.69
  -4   0   6   56.37    2.96
   5   0  -6   35.02    2.20
  -5   0   6   31.46    2.18
  -5   0   6   35.21    2.20
   5   0  -6   32.74    1.76
   5   0  -6   31.25    1.76
   6   0  -6    1.54    0.20
  -6   0   6    1.77    0.27
   6   0  -6    1.73    0.27
  -6   0   6    1.35    0.23
   6   0  -6    1.77    0.21
  -7   0   6   20.17    1.32
   7   0  -6   16.62    1.05
  -7   1  -6    3.76    0.48
  -7  -1  -6    3.76    0.50
   6   1   6   18.08    1.05
  -6   1  -6   19.99    1.30
   6   1   6   18.97    1.32
   6   1   6   18.46    1.04
   6  -1   6   18.17    1.30
   6  -1   6   16.85    1.04
   6  -1   6   17.88    1.04
  -6  -1  -6   20.25    1.32
   5   1   6   24.58    1.27
  -5   1  -6   22.22    1.57
  -5   1  -6   21.94    1.35
   5   1   6   24.16    1.59
   5   1   6   23.78    1.27
  -5   1  -6   25.39    1.58
  -5  -1  -6   22.29    1.58
  -5  -1  -6   21.17    1.25
   5  -1   6   22.88    1.27
  -5  -1  -6   22.50    1.35
  -5  -1  -6   25.41    1.59
   5  -1   6   24.50    1.27
   5  -1   6   23.52    1.58
   4   1   6   41.30    2.50
  -4   1  -6   36.36    1.99
   4   1   6   35.58    2.49
   4   1   6   38.53    2.00
   4   1   6   36.90    2.00
  -4   1  -6   41.35    2.49
  -4   1  -6   34.43    2.11
  -4   1  -6   37.36    1.98
  -4  -1  -6   40.95    2.50
  -4  -1  -6   35.68    1.99
  -4  -1  -6   36.34    2.49
   4  -1   6   37.99    2.00
  -4  -1  -6   37.62    2.00
   4  -1   6   41.19    2.49
   4  -1   6   39.52    2.00
  -4  -1  -6   36.81    2.12
   3   1   6    2.12    0.19
  -3   1  -6    2.31    0.17
   3   1   6    2.13    0.18
  -3   1  -6    2.11    0.21
  -3   1  -6    2.10    0.23
  -3   1  -6    2.06    0.16
   3   1   6    2.14    0.25
   3   1   6    1.65    0.22
   3  -1   6    1.66    0.21
  -3  -1  -6    2.15    0.23
  -3  -1  -6    2.28    0.20
   3  -1   6    1.77    0.23
  -3  -1  -6    2.29    0.17
   3  -1   6    2.10    0.18
  -3  -1  -6    2.27    0.18
   3  -1   6    2.15    0.18
  -3  -1  -6    2.09    0.24
   2   1   6   21.23    1.47
  -2   1  -6   21.30    1.25
  -2   1  -6   22.94    1.18
  -2   1  -6   21.65    1.47
   2   1   6   21.09    1.47
  -2   1  -6   23.78    1.18
   2   1   6   22.61    1.18
   2   1   6   23.60    1.19
  -2  -1  -6   23.20    1.48
  -2  -1  -6   21.86    1.47
  -2  -1  -6   23.41    1.19
  -2  -1  -6   22.68    1.25
  -2  -1  -6   23.21    1.18
   2  -1   6   22.49    1.47
   2  -1   6   22.82    1.18
   2  -1   6   21.12    1.47
   2  -1   6   22.12    1.18
   1   1   6  108.11    5.49
   1   1   6  106.07    6.82
  -1   1  -6  105.33    5.48
  -1   1  -6  107.18    5.51
  -1   1  -6  104.21    6.82
  -1   1  -6  112.17    6.82
   1   1   6  106.13    6.82
  -1   1  -6  105.89    5.77
   1  -1   6  102.46    6.82
   1  -1   6  107.14    5.49
  -1  -1  -6  104.30    5.79
  -1  -1  -6  102.94    6.82
  -1  -1  -6  111.17    6.82
   1  -1   6  104.26    5.77
   1  -1   6  110.22    5.49
   1  -1   6  107.78    6.82
   0   1  -6    4.63    0.37
   0   1   6    5.42    0.36
   0   1   6    4.95    0.29
   0   1  -6    4.75    0.36
   0   1   6    5.06    0.29
   0   1   6    5.30    0.37
   0   1  -6    5.00    0.29
   0   1   6    5.20    0.29
   0  -1  -6    4.84    0.36
   0  -1   6    4.66    0.36
   0  -1  -6    5.34    0.29
   0  -1  -6    5.18    0.37
   0  -1   6    4.81    0.29
   0  -1  -6    5.16    0.29
   1   1  -6    8.25    0.46
  -1   1   6    8.91    0.46
   1   1  -6    8.24    0.58
  -1   1   6    8.04    0.46
   1   1  -6    8.92    0.47
   1   1  -6    8.65    0.58
  -1   1   6    8.93    0.58
   1  -1  -6    8.17    0.46
   1  -1  -6    8.07    0.58
   1  -1  -6    8.61    0.46
   1  -1  -6    9.39    0.58
  -1  -1   6    8.43    0.58
  -1  -1   6    8.46    0.58
  -1  -1   6    7.54    0.46
   2   1  -6  110.08    6.96
  -2   1   6  109.88    5.59
   2   1  -6  105.11    6.95
  -2   1   6  108.27    6.95
  -2   1   6  107.94    5.59
   2   1  -6  109.56    5.59
   2   1  -6  108.50    5.59
  -2  -1   6  110.05    5.59
  -2  -1   6  111.11    5.59
  -2  -1   6  104.90    6.95
   2  -1  -6  111.61    5.59
   2  -1  -6  110.56    6.95
  -2  -1   6  108.18    6.96
   2  -1  -6  110.58    5.59
   2  -1  -6  103.51    6.95
  -3   1   6  332.20   21.95
   3   1  -6  337.86   17.70
  -3   1   6  369.81   21.96
  -3   1   6  333.08   17.67
   3   1  -6  339.04   17.72
   3   1  -6  319.67   21.87
   3   1  -6  338.91   21.89
  -3   1   6  347.05   17.69
   3  -1  -6  324.03   21.89
  -3  -1   6  339.21   21.89
   3  -1  -6  349.39   17.67
   3  -1  -6  352.53   17.70
  -3  -1   6  357.61   17.74
  -3  -1   6  351.75   22.04
  -3  -1   6  341.49   17.64
   3  -1  -6  354.95   21.94
  -4   1   6   11.24    0.78
   4   1  -6   10.84    0.79
   4   1  -6   11.38    0.63
  -4   1   6   10.34    0.77
   4   1  -6   11.29    0.63
  -4   1   6   10.83    0.60
  -4  -1   6   10.71    0.61
   4  -1  -6   10.98    0.62
   4  -1  -6   10.86    0.62
  -4  -1   6   11.64    0.80
  -4  -1   6   11.59    0.62
   4  -1  -6   10.31    0.78
   5   1  -6   56.94    3.70
  -5   1   6   52.63    3.67
  -5   1   6   61.01    3.69
   5   1  -6   58.07    2.97
   5   1  -6   56.37    2.97
   5  -1  -6   58.85    2.97
  -5  -1   6   60.57    3.70
  -5  -1   6   50.70    2.95
   5  -1  -6   57.13    3.69
   5  -1  -6   55.08    2.96
  -6   1   6    1.65    0.25
   6   1  -6    1.17    0.19
   6   1  -6    1.31    0.19
   6   1  -6    1.77    0.28
   6  -1  -6    1.35    0.18
   6  -1  -6    1.37    0.19
   6  -1  -6    2.20    0.28
  -6  -1   6    1.74    0.28
  -7   1   6    0.03    0.20
   7  -1  -6    0.03    0.15
  -7  -1   6    0.01    0.23
  -7   2  -6   -0.16    0.21
  -7  -2  -6    0.08    0.23
   7  -2   6   -0.02    0.15
  -6   2  -6    0.02    0.14
   6   2   6    0.12    0.14
   6   2   6    0.07    0.12
   6   2   6    0.10    0.21
  -6   2  -6    0.07    0.18
  -6  -2  -6    0.05    0.20
   6  -2   6    0.06    0.13
   6  -2   6    0.01    0.13
   6  -2   6    0.04    0.17
   5   2   6    0.20    0.12
  -5   2  -6    0.42    0.15
   5   2   6    0.20    0.17
  -5   2  -6    0.31    0.14
   5   2   6    0.48    0.12
  -5   2  -6    0.21    0.16
  -5  -2  -6    0.43    0.11
  -5  -2  -6    0.24    0.15
   5  -2   6    0.34    0.12
  -5  -2  -6    0.32    0.18
  -5  -2  -6    0.35    0.10
   5  -2   6    0.51    0.13
  -4   2  -6    0.14    0.12
   4   2   6    0.22    0.10
  -4   2  -6    0.28    0.07
   4   2   6    0.11    0.12
   4   2   6    0.17    0.10
   4   2   6    0.21    0.14
  -4   2  -6    0.29    0.12
  -4   2  -6    0.01    0.11
   4  -2   6    0.11    0.08
   4  -2   6    0.24    0.13
   4  -2   6    0.12    0.09
  -4  -2  -6    0.19    0.09
  -4  -2  -6    0.18    0.13
  -4  -2  -6    0.38    0.10
  -4  -2  -6    0.28    0.14
  -3   2  -6    0.43    0.11
   3   2   6    0.81    0.15
   3   2   6    0.52    0.10
   3   2   6    0.46    0.12
  -3   2  -6    0.39    0.07
  -3   2  -6    0.45    0.11
  -3   2  -6    0.48    0.12
   3   2   6    0.31    0.08
  -3   2  -6    0.36    0.07
  -3  -2  -6    0.47    0.13
  -3  -2  -6    0.42    0.09
   3  -2   6    0.40    0.11
   3  -2   6    0.32    0.08
   3  -2   6    0.40    0.09
  -3  -2  -6    0.73    0.10
  -3  -2  -6    0.66    0.14
  -2   2  -6    0.46    0.10
  -2   2  -6    0.40    0.06
   2   2   6    0.32    0.10
  -2   2  -6    0.47    0.06
   2   2   6    0.46    0.10
  -2   2  -6    0.41    0.10
   2   2   6    0.40    0.07
   2  -2   6    0.48    0.08
   2  -2   6    0.40    0.09
   2  -2   6    0.32    0.06
   2  -2   6    0.37    0.10
  -2  -2  -6    0.29    0.10
  -2  -2  -6    0.33    0.09
  -2  -2  -6    0.39    0.07
   2  -2   6    0.47    0.09
  -1   2  -6    4.85    0.28
  -1   2  -6    4.79    0.36
  -1   2  -6    4.98    0.28
   1   2   6    4.89    0.36
   1   2   6    4.98    0.36
   1   2   6    4.91    0.28
   1   2   6    4.60    0.28
   1  -2   6    4.80    0.35
  -1  -2  -6    5.07    0.29
   1  -2   6    4.91    0.36
   1  -2   6    4.80    0.31
  -1  -2  -6    4.88    0.36
  -1  -2  -6    4.84    0.36
  -1  -2  -6    5.11    0.29
   1  -2   6    4.76    0.28
   1  -2   6    4.69    0.28
   0   2  -6    5.44    0.30
   0   2   6    5.03    0.30
   0   2  -6    5.39    0.30
   0   2  -6    5.39    0.38
   0   2   6    5.33    0.38
   0   2   6    5.36    0.30
   0   2  -6    5.66    0.39
   0  -2  -6    5.26    0.30
   0  -2  -6    5.35    0.30
   0  -2   6    5.11    0.30
   0  -2  -6    5.39    0.30
   0  -2   6    5.47    0.39
   0  -2   6    5.28    0.30
   0  -2  -6    5.03    0.38
   0  -2  -6    5.59    0.38
   0  -2   6    5.21    0.38
  -1   2   6   53.68    2.76
  -1   2   6   53.93    3.43
  -1   2   6   54.60    2.75
   1   2  -6   53.38    3.44
   1   2  -6   54.21    3.44
  -1   2   6   49.41    3.43
   1  -2  -6   51.81    2.76
   1  -2  -6   51.39    3.43
  -1  -2   6   52.10    3.44
   1  -2  -6   56.38    3.44
  -1  -2   6   55.02    3.44
   1  -2  -6   54.83    2.76
  -2   2   6   48.91    3.02
  -2   2   6   46.29    3.02
  -2   2   6   46.81    2.42
   2   2  -6   44.45    3.03
   2   2  -6   48.77    2.44
  -2   2   6   48.70    2.42
   2   2  -6   42.75    3.03
  -2  -2   6   48.50    3.03
  -2  -2   6   43.48    3.03
  -2  -2   6   46.64    2.43
   2  -2  -6   46.04    3.02
  -2  -2   6   51.54    2.44
   2  -2  -6   43.26    3.02
   2  -2  -6   49.28    2.43
   2  -2  -6   48.04    2.43
  -3   2   6    0.09    0.09
  -3   2   6    0.28    0.05
   3   2  -6    0.19    0.08
  -3   2   6    0.33    0.11
   3   2  -6    0.14    0.12
   3   2  -6    0.24    0.09
  -3   2   6    0.34    0.05
   3   2  -6    0.23    0.12
   3  -2  -6    0.22    0.07
  -3  -2   6    0.23    0.08
  -3  -2   6    0.18    0.10
  -3  -2   6    0.30    0.13
   3  -2  -6    0.24    0.08
   3  -2  -6    0.27    0.11
   4   2  -6    1.01    0.18
   4   2  -6    0.81    0.13
   4   2  -6    0.92    0.14
  -4   2   6    0.94    0.14
  -4   2   6    0.86    0.15
  -4  -2   6    0.92    0.18
   4  -2  -6    0.96    0.16
  -4  -2   6    0.62    0.10
  -4  -2   6    0.96    0.16
   4  -2  -6    0.88    0.12
   4  -2  -6    0.62    0.10
  -4  -2   6    0.69    0.10
   5   2  -6    0.09    0.17
  -5   2   6    0.05    0.12
  -5   2   6    0.03    0.14
   5   2  -6    0.05    0.11
   5   2  -6    0.09    0.12
  -5  -2   6   -0.03    0.12
   5  -2  -6    0.02    0.11
  -5  -2   6    0.18    0.09
   5  -2  -6    0.13    0.11
  -5  -2   6    0.07    0.17
   5  -2  -6    0.11    0.15
  -6   2   6    9.15    0.68
   6   2  -6    8.42    0.56
   6   2  -6    8.56    0.71
  -6   2   6    8.24    0.57
   6   2  -6    8.80    0.56
  -6   2   6    7.49    0.64
  -6  -2   6    9.50    0.72
   6  -2  -6    9.19    0.55
   6  -2  -6    7.84    0.68
   6  -2  -6    8.18    0.55
  -7   2   6    1.73    0.28
   7  -2  -6    1.40    0.21
  -7  -2   6    2.23    0.34
   7  -2  -6    1.97    0.25
  -7   3  -6    0.60    0.22
  -7  -3  -6    0.67    0.27
   7  -3   6    0.59    0.19
   6   3   6   14.95    1.07
   6   3   6   13.72    0.84
  -6   3  -6   13.76    1.00
  -6   3  -6   15.45    1.02
   6   3   6   13.75    0.83
   6  -3   6   13.34    1.04
  -6  -3  -6   15.19    1.06
   6  -3   6   13.32    0.82
   6  -3   6   14.67    0.83
  -5   3  -6   11.61    0.77
   5   3   6   11.06    0.82
   5   3   6   10.55    0.63
  -5   3  -6   10.36    0.76
  -5   3  -6   10.31    0.69
   5   3   6   10.34    0.63
  -5  -3  -6   10.38    0.63
   5  -3   6   11.26    0.62
  -5  -3  -6    9.32    0.61
  -5  -3  -6   12.25    0.82
   5  -3   6   10.07    0.62
  -5  -3  -6    9.40    0.78
   5  -3   6   10.17    0.78
   4   3   6    1.53    0.22
   4   3   6    1.29    0.23
  -4   3  -6    1.86    0.23
  -4   3  -6    1.70    0.24
   4   3   6    1.74    0.20
   4   3   6    2.25    0.20
  -4   3  -6    2.19    0.23
  -4  -3  -6    1.88    0.20
  -4  -3  -6    1.94    0.20
  -4  -3  -6    1.86    0.24
   4  -3   6    2.21    0.20
  -4  -3  -6    2.01    0.28
   4  -3   6    1.78    0.19
   3   3   6    3.52    0.36
   3   3   6    3.70    0.34
  -3   3  -6    4.05    0.30
  -3   3  -6    4.27    0.33
  -3   3  -6    4.34    0.33
  -3   3  -6    4.34    0.24
  -3   3  -6    4.24    0.24
   3   3   6    4.02    0.28
   3  -3   6    4.32    0.27
  -3  -3  -6    4.31    0.36
   3  -3   6    4.32    0.27
  -3  -3  -6    3.52    0.27
  -3  -3  -6    3.82    0.35
  -3  -3  -6    4.36    0.28
   3  -3   6    4.29    0.34
  -2   3  -6  127.60    7.20
  -2   3  -6  138.17    6.86
   2   3   6  125.80    8.50
  -2   3  -6  130.47    8.50
   2   3   6  132.42    6.84
   2   3   6  129.69    8.50
   2   3   6  139.60    6.84
  -2   3  -6  137.85    6.86
  -2   3  -6  137.17    8.50
   2  -3   6  136.17    6.84
  -2  -3  -6  137.24    8.51
  -2  -3  -6  133.62    6.84
   2  -3   6  131.78    6.84
   2  -3   6  132.58    8.50
   2  -3   6  131.22    7.21
  -2  -3  -6  133.26    6.84
   2  -3   6  128.12    8.50
  -2  -3  -6  130.33    8.51
  -1   3  -6   98.44    4.89
   1   3   6   92.53    4.90
   1   3   6   92.90    6.09
   1   3   6  100.49    6.09
  -1   3  -6   98.29    6.09
  -1   3  -6   94.16    4.91
   1   3   6   95.30    4.90
  -1  -3  -6   96.32    6.09
   1  -3   6   95.72    4.90
  -1  -3  -6   93.74    4.90
  -1  -3  -6   90.72    6.09
   1  -3   6   95.75    6.09
   1  -3   6   91.83    6.09
   1  -3   6   95.84    4.90
   1  -3   6   95.09    5.16
  -1  -3  -6   94.92    4.90
   0   3   6   45.57    2.36
   0   3  -6   45.30    2.36
   0   3  -6   48.36    2.36
   0   3   6   46.51    2.93
   0   3  -6   46.12    2.94
   0   3   6   46.39    2.36
   0   3  -6   40.28    2.93
   0  -3  -6   46.60    2.36
   0  -3   6   45.88    2.36
   0  -3   6   44.69    2.94
   0  -3  -6   46.42    2.94
   0  -3  -6   43.64    2.93
   0  -3   6   47.12    2.94
   0  -3  -6   45.09    2.36
   0  -3   6   45.89    2.36
  -1   3   6  190.76   12.30
   1   3  -6  194.44    9.93
  -1   3   6  192.31   12.31
   1   3  -6  183.40   12.31
   1   3  -6  196.12    9.91
  -1   3   6  194.67    9.88
   1   3  -6  192.14   12.29
  -1   3   6  195.89    9.88
   1  -3  -6  198.38    9.90
   1  -3  -6  189.41    9.92
  -1  -3   6  196.44    9.92
   1  -3  -6  176.73   12.30
   1  -3  -6  193.76   12.32
  -1  -3   6  181.77   12.29
  -1  -3   6  201.89   12.25
  -2   3   6   63.40    4.06
   2   3  -6   63.39    4.08
   2   3  -6   60.86    4.08
  -2   3   6   64.62    4.06
  -2   3   6   66.06    3.43
   2  -3  -6   64.26    3.27
   2  -3  -6   65.30    3.27
   2  -3  -6   64.28    4.07
   2  -3  -6   57.03    4.06
  -2  -3   6   59.79    4.08
  -2  -3   6   64.83    3.28
  -2  -3   6   65.80    4.08
   3   3  -6   24.90    1.53
   3   3  -6   22.94    1.22
  -3   3   6   22.86    1.50
   3   3  -6   20.39    1.51
  -3   3   6   22.51    1.26
  -3   3   6   24.37    1.49
   3   3  -6   22.52    1.22
   3  -3  -6   23.59    1.50
   3  -3  -6   23.00    1.21
   3  -3  -6   22.21    1.20
  -3  -3   6   21.86    1.21
  -3  -3   6   22.68    1.22
  -3  -3   6   23.92    1.52
  -3  -3   6   22.36    1.51
  -4   3   6    7.92    0.56
  -4   3   6    8.37    0.57
   4   3  -6    8.05    0.48
  -4   3   6    8.00    0.49
   4   3  -6    7.91    0.61
   4   3  -6    6.73    0.59
   4   3  -6    7.79    0.48
  -4  -3   6    7.84    0.47
   4  -3  -6    8.68    0.47
  -4  -3   6    7.98    0.61
  -4  -3   6    7.31    0.59
   4  -3  -6    7.96    0.58
   4  -3  -6    8.10    0.46
  -4  -3   6    8.09    0.48
  -5   3   6   19.29    1.24
   5   3  -6   19.16    1.28
  -5   3   6   18.22    1.06
  -5   3   6   17.63    1.22
   5   3  -6   18.12    1.02
   5   3  -6   18.36    1.02
  -5  -3   6   19.47    1.28
  -5  -3   6   16.73    1.25
  -5  -3   6   16.88    1.00
   5  -3  -6   18.31    1.00
  -5  -3   6   17.62    1.01
   5  -3  -6   18.92    1.26
   5  -3  -6   19.58    1.01
   6   3  -6    1.35    0.26
   6   3  -6    1.29    0.20
  -6   3   6    1.27    0.20
  -6   3   6    1.78    0.25
  -6   3   6    1.59    0.22
   6   3  -6    1.53    0.21
   6  -3  -6    1.19    0.18
   6  -3  -6    1.35    0.19
  -6  -3   6    1.74    0.28
  -7   3   6    1.58    0.25
   7  -3  -6    1.41    0.22
  -7  -3   6    1.51    0.32
   7  -3  -6    1.31    0.21
   7   4   6   31.76    2.09
  -7   4  -6   30.92    2.01
  -7  -4  -6   31.86    2.08
   7  -4   6   28.27    1.64
   7  -4   6   27.77    1.64
   6   4   6    0.61    0.26
  -6   4  -6    0.54    0.17
  -6   4  -6    0.34    0.18
   6  -4   6    0.33    0.14
   6  -4   6    0.38    0.15
  -6  -4  -6    0.54    0.24
  -5   4  -6    1.69    0.24
   5   4   6    1.28    0.17
  -5   4  -6    1.39    0.22
   5   4   6    1.99    0.28
   5   4   6    1.56    0.19
  -5   4  -6    2.01    0.27
  -5  -4  -6    1.78    0.19
   5  -4   6    1.42    0.17
  -5  -4  -6    1.62    0.26
   5  -4   6    2.05    0.22
  -5  -4  -6    1.68    0.25
  -5  -4  -6    1.37    0.18
   5  -4   6    2.30    0.28
  -4   4  -6   15.51    1.06
  -4   4  -6   17.21    1.06
   4   4   6   16.80    1.10
   4   4   6   13.73    1.08
  -4   4  -6   14.64    0.93
   4   4   6   15.71    0.87
   4  -4   6   15.41    0.86
  -4  -4  -6   15.18    0.87
   4  -4   6   16.17    1.07
  -4  -4  -6   14.44    1.08
  -4  -4  -6   15.70    0.87
   4  -4   6   16.55    0.86
  -4  -4  -6   16.92    1.10
   3   4   6   37.94    2.50
   3   4   6   35.87    2.50
  -3   4  -6   36.19    2.12
  -3   4  -6   38.28    1.97
  -3   4  -6   40.50    2.48
  -3   4  -6   37.99    2.48
   3   4   6   39.16    2.01
  -3  -4  -6   39.72    2.51
  -3  -4  -6   36.51    2.50
   3  -4   6   38.20    2.49
   3  -4   6   38.17    2.13
   3  -4   6   40.12    2.00
  -3  -4  -6   40.03    2.01
   3  -4   6   37.76    2.00
   2   4   6  288.40   14.83
  -2   4  -6  293.75   14.79
  -2   4  -6  287.64   18.41
  -2   4  -6  291.21   14.78
  -2   4  -6  297.15   18.47
   2   4   6  295.76   18.45
   2   4   6  300.82   14.87
   2   4   6  272.88   18.40
   2  -4   6  284.07   15.65
  -2  -4  -6  294.68   14.87
   2  -4   6  297.33   14.83
  -2  -4  -6  282.88   18.45
   2  -4   6  263.92   18.38
   2  -4   6  285.69   14.85
  -2  -4  -6  280.57   18.34
   2  -4   6  285.84   18.35
  -2  -4  -6  286.07   14.89
   1   4   6    1.32    0.17
  -1   4  -6    1.20    0.09
  -1   4  -6    1.18    0.09
   1   4   6    1.15    0.11
  -1   4  -6    1.37    0.15
   1   4   6    1.17    0.11
  -1   4  -6    1.14    0.14
   1  -4   6    1.25    0.11
  -1  -4  -6    1.30    0.16
  -1  -4  -6    1.11    0.15
   1  -4   6    1.18    0.12
   1  -4   6    1.27    0.16
  -1  -4  -6    1.33    0.12
   1  -4   6    1.16    0.14
   1  -4   6    1.31    0.14
  -1  -4  -6    1.19    0.12
   0   4  -6   61.32    3.19
   0   4  -6   62.25    3.97
   0   4  -6   64.78    3.19
   0   4   6   62.10    3.18
   0   4   6   61.96    3.18
   0   4   6   59.87    3.96
   0  -4  -6   62.28    3.19
   0  -4   6   63.26    3.97
   0  -4  -6   62.49    3.97
   0  -4   6   58.68    3.97
   0  -4  -6   63.06    3.19
   0  -4   6   62.89    3.19
   0  -4  -6   57.49    3.97
   0  -4   6   62.88    3.19
   1   4  -6  113.29    7.39
  -1   4   6  112.51    7.38
   1   4  -6  115.68    5.94
   1   4  -6  114.25    7.39
   1   4  -6  116.41    5.95
  -1   4   6  116.10    7.43
   1  -4  -6  117.58    5.94
   1  -4  -6  119.94    5.93
   1  -4  -6  119.50    7.38
  -1  -4   6  108.89    7.39
  -1  -4   6  118.04    7.39
  -1  -4   6  119.35    5.95
   1  -4  -6  109.94    7.38
   2   4  -6  299.26   15.22
   2   4  -6  284.95   15.18
  -2   4   6  301.01   18.90
   2   4  -6  302.44   18.98
   2   4  -6  285.82   18.87
  -2   4   6  311.04   18.88
  -2  -4   6  309.56   19.00
   2  -4  -6  301.23   15.20
  -2  -4   6  298.78   18.83
   2  -4  -6  305.72   18.88
   2  -4  -6  300.78   15.22
  -2  -4   6  301.15   15.27
  -2  -4   6  255.71   15.22
   2  -4  -6  275.98   18.86
   3   4  -6   13.74    0.94
  -3   4   6   14.46    0.90
  -3   4   6   12.87    0.76
   3   4  -6   12.55    0.93
  -3   4   6   14.19    0.89
   3   4  -6   13.43    0.74
   3  -4  -6   13.24    0.72
   3  -4  -6   13.75    0.73
  -3  -4   6   13.26    0.74
   3  -4  -6   13.98    0.91
  -3  -4   6   13.77    0.93
  -3  -4   6   12.38    0.92
  -3  -4   6   13.63    0.74
  -4   4   6   11.16    0.70
   4   4  -6   11.76    0.68
  -4   4   6   13.41    0.81
   4   4  -6   13.23    0.87
   4   4  -6   11.06    0.68
   4   4  -6   10.48    0.84
  -4   4   6   12.04    0.82
  -4  -4   6   11.27    0.67
   4  -4  -6   12.70    0.67
  -4  -4   6   12.08    0.85
  -4  -4   6   11.85    0.68
   4  -4  -6   12.58    0.83
   4  -4  -6   11.69    0.66
  -4  -4   6   12.71    0.87
   5   4  -6   38.20    2.39
   5   4  -6   32.86    1.90
  -5   4   6   39.35    2.34
  -5   4   6   37.62    2.34
   5   4  -6   35.89    1.91
  -5   4   6   34.42    2.00
  -5  -4   6   32.18    1.90
  -5  -4   6   34.88    1.90
   5  -4  -6   35.25    1.89
  -5  -4   6   38.29    2.39
   5  -4  -6   37.67    2.36
   5  -4  -6   37.33    1.90
  -5  -4   6   32.53    2.37
  -6   4   6   11.63    0.80
  -6   4   6    9.90    0.70
  -6   4   6   10.97    0.78
   6   4  -6   11.26    0.87
   6  -4  -6   10.29    0.66
   6  -4  -6   10.99    0.66
  -6  -4   6   12.40    0.88
  -7   4   6    9.44    0.69
   7  -4  -6    8.23    0.59
   7  -4  -6    8.67    0.59
  -7  -4   6    9.50    0.82
  -7   5  -6    0.24    0.17
   7   5   6    0.34    0.29
   7  -5   6    0.20    0.15
  -7  -5  -6    0.28    0.27
   7  -5   6    0.06    0.16
  -6   5  -6   38.85    2.48
   6   5   6   40.65    2.55
  -6   5  -6   35.30    2.48
   6  -5   6   38.05    2.01
  -6  -5  -6   40.35    2.55
   6  -5   6   34.16    2.01
  -5   5  -6   12.54    0.84
  -5   5  -6   11.69    0.76
   5   5   6   11.97    0.70
  -5   5  -6   12.22    0.83
   5   5   6   13.27    0.91
   5   5   6    9.84    0.86
   5  -5   6   10.82    0.85
  -5  -5  -6   13.65    0.91
   5  -5   6   13.24    0.69
  -5  -5  -6   11.34    0.69
  -5  -5  -6   11.99    0.70
   5  -5   6   11.29    0.68
   4   5   6   34.66    2.58
  -4   5  -6   37.11    2.20
   4   5   6   39.10    2.08
   4   5   6   38.60    2.08
  -4   5  -6   39.59    2.56
  -4   5  -6   41.86    2.56
   4   5   6   41.66    2.60
   4  -5   6   38.12    2.07
  -4  -5  -6   39.56    2.08
   4  -5   6   40.06    2.57
  -4  -5  -6   40.41    2.60
   4  -5   6   42.50    2.07
   3   5   6  100.65    5.15
  -3   5  -6  101.23    6.38
   3   5   6   91.19    6.40
  -3   5  -6   93.70    5.42
   3   5   6   98.87    6.40
  -3   5  -6  100.07    6.38
   3   5   6   97.28    5.15
   3  -5   6   97.24    6.39
   3  -5   6  107.18    5.14
  -3  -5  -6  100.48    5.15
  -3  -5  -6   99.59    6.40
   3  -5   6  106.59    5.43
   3  -5   6   98.60    5.14
  -3  -5  -6  101.98    5.15
  -2   5  -6  124.47    7.93
   2   5   6  119.38    7.95
   2   5   6  118.82    7.95
   2   5   6  126.75    6.39
  -2   5  -6  123.69    7.95
   2   5   6  126.94    6.39
   2  -5   6  124.97    6.39
   2  -5   6  126.35    6.74
  -2  -5  -6  122.57    6.39
   2  -5   6  117.69    7.94
  -2  -5  -6  123.58    7.95
  -2  -5  -6  131.27    6.40
   2  -5   6  129.17    6.38
   2  -5   6  122.42    7.94
   1   5   6  172.22    8.67
  -1   5  -6  169.29    8.67
   1   5   6  167.00    8.71
  -1   5  -6  171.14   10.79
   1   5   6  170.24   10.79
  -1   5  -6  169.43    8.68
  -1   5  -6  168.65   10.79
   1  -5   6  171.71    8.70
  -1  -5  -6  170.41    8.68
  -1  -5  -6  171.47    8.66
   1  -5   6  169.51   10.81
   1  -5   6  165.62    8.70
  -1  -5  -6  157.03   10.76
  -1  -5  -6  172.29   10.77
   1  -5   6  158.65   10.76
   1  -5   6  170.85    9.12
   0   5  -6  254.77   12.94
   0   5   6  254.76   12.90
   0   5   6  254.42   12.90
   0   5   6  247.79   16.09
   0   5  -6  263.31   12.92
   0   5  -6  253.15   16.06
   0   5   6  243.95   16.07
   0  -5  -6  237.90   15.99
   0  -5   6  262.35   12.93
   0  -5   6  256.66   12.96
   0  -5  -6  253.84   12.96
   0  -5   6  249.47   16.09
   0  -5   6  229.77   16.09
   0  -5  -6  239.74   16.06
   0  -5  -6  261.09   12.94
   1   5  -6   28.28    1.95
   1   5  -6   32.88    1.57
  -1   5   6   28.83    1.93
  -1   5   6   27.57    1.93
   1   5  -6   30.80    1.57
   1   5  -6   28.21    1.95
   1  -5  -6   28.64    1.94
   1  -5  -6   32.01    1.62
  -1  -5   6   27.18    1.95
   1  -5  -6   30.94    1.55
  -1  -5   6   30.10    1.96
   1  -5  -6   30.46    1.94
   1  -5  -6   31.65    1.56
  -1  -5   6   32.15    1.57
   2   5  -6    5.60    0.45
   2   5  -6    5.64    0.35
   2   5  -6    5.71    0.46
  -2   5   6    6.40    0.40
   2   5  -6    5.78    0.36
  -2   5   6    6.07    0.40
   2  -5  -6    6.06    0.33
  -2  -5   6    5.85    0.36
  -2  -5   6    5.67    0.45
   2  -5  -6    5.99    0.42
  -2  -5   6    6.16    0.46
   2  -5  -6    6.01    0.33
   3   5  -6  150.91   10.14
   3   5  -6  163.72    8.16
   3   5  -6  160.41   10.14
  -3   5   6  153.20    8.55
  -3   5   6  161.70   10.11
  -3   5   6  156.61   10.11
   3  -5  -6  159.36   10.11
   3  -5  -6  164.07    8.15
  -3  -5   6  163.41    8.16
  -3  -5   6  140.87   10.13
   3  -5  -6  165.76    8.14
  -3  -5   6  160.62   10.14
  -4   5   6   30.23    1.61
   4   5  -6   29.52    1.55
   4   5  -6   28.00    1.93
   4   5  -6   24.91    1.91
  -4   5   6   29.91    1.87
  -4   5   6   26.07    1.86
   4  -5  -6   31.69    1.52
  -4  -5   6   30.29    1.93
  -4  -5   6   29.95    1.54
  -4  -5   6   28.71    1.54
   4  -5  -6   30.15    1.52
   4  -5  -6   27.34    1.89
   5   5  -6   19.87    1.33
  -5   5   6   18.16    1.08
  -5   5   6   18.81    1.24
   5   5  -6   18.91    1.05
   5   5  -6   17.39    1.04
  -5   5   6   20.38    1.25
  -5  -5   6   15.76    1.29
  -5  -5   6   17.58    1.04
  -5  -5   6   20.68    1.33
  -5  -5   6   18.83    1.04
   5  -5  -6   18.25    1.28
   5  -5  -6   19.83    1.03
   5  -5  -6   20.68    1.03
  -6   5   6    0.25    0.14
  -6   5   6    0.27    0.14
   6   5  -6    0.26    0.23
   6  -5  -6    0.20    0.14
  -6  -5   6    0.22    0.22
   6  -5  -6    0.34    0.14
  -7   5   6    0.52    0.16
   7   5  -6    0.73    0.29
  -7   5   6    0.35    0.14
  -7  -5   6    0.50    0.27
   7  -5  -6    0.31    0.17
   7  -5  -6    0.41    0.18
  -7   6  -6    3.01    0.33
  -7   6  -6    2.84    0.31
   7   6   6    2.66    0.42
   7  -6   6    2.57    0.28
  -7  -6  -6    2.94    0.41
   7  -6   6    2.92    0.35
  -6   6  -6    2.90    0.31
   6   6   6    2.53    0.38
  -6   6  -6    2.80    0.30
   6  -6   6    3.28    0.31
   6  -6   6    2.93    0.30
  -6  -6  -6    3.07    0.40
  -5   6  -6    1.81    0.22
   5   6   6    1.81    0.20
   5   6   6    1.33    0.28
   5   6   6    2.19    0.21
  -5   6  -6    1.69    0.24
   5   6   6    1.04    0.23
   5  -6   6    1.46    0.22
   5  -6   6    1.96    0.22
  -5  -6  -6    1.93    0.30
   5  -6   6    1.93    0.22
  -5  -6  -6    1.57    0.19
  -5  -6  -6    1.59    0.19
  -4   6  -6   19.51    1.23
  -4   6  -6   18.68    1.23
   4   6   6   19.22    1.02
  -4   6  -6   17.14    1.09
   4   6   6   17.02    1.27
   4   6   6   19.39    1.29
   4   6   6   17.92    1.02
  -4  -6  -6   19.03    1.02
   4  -6   6   18.85    1.00
   4  -6   6   20.59    1.01
  -4  -6  -6   16.12    1.26
  -4  -6  -6   19.30    1.29
   3   6   6   54.87    2.76
   3   6   6   53.47    3.44
  -3   6  -6   53.09    3.40
  -3   6  -6   52.77    3.40
   3   6   6   51.61    2.76
   3   6   6   47.86    3.43
   3  -6   6   55.81    2.75
   3  -6   6   53.67    2.93
   3  -6   6   50.82    3.42
  -3  -6  -6   54.41    2.77
  -3  -6  -6   54.82    3.45
  -3  -6  -6   52.90    2.76
   3  -6   6   52.47    2.75
  -2   6  -6    2.71    0.22
   2   6   6    2.67    0.27
   2   6   6    2.70    0.19
   2   6   6    2.84    0.19
   2   6   6    2.29    0.25
  -2   6  -6    2.54    0.22
   2  -6   6    2.68    0.24
   2  -6   6    2.96    0.19
  -2  -6  -6    2.18    0.25
   2  -6   6    2.77    0.25
   2  -6   6    2.80    0.18
  -2  -6  -6    2.93    0.21
  -2  -6  -6    2.55    0.27
  -2  -6  -6    2.52    0.20
   1   6   6   34.39    1.75
   1   6   6   34.91    1.76
  -1   6  -6   33.42    2.18
  -1   6  -6   33.35    2.18
   1   6   6   33.00    2.19
   1   6   6   34.04    2.19
   1  -6   6   33.57    2.19
  -1  -6  -6   31.07    2.19
   1  -6   6   34.90    1.76
  -1  -6  -6   34.39    1.76
  -1  -6  -6   35.83    1.77
   1  -6   6   34.66    1.76
   1  -6   6   31.49    2.19
  -1  -6  -6   33.92    2.20
   0   6  -6  186.72    9.24
   0   6   6  175.04   11.52
   0   6  -6  179.81   11.51
   0   6   6  170.66   11.49
   0   6  -6  175.38    9.26
   0   6  -6  179.84   11.46
   0  -6   6  182.60    9.28
   0  -6   6  185.09   11.47
   0  -6   6  182.68    9.28
   0  -6  -6  183.50    9.26
   0  -6  -6  170.64   11.46
   0  -6   6  163.82   11.47
   0  -6  -6  191.07    9.22
   0  -6  -6  187.64   11.50
   1   6  -6    8.20    0.63
   1   6  -6    9.80    0.49
   1   6  -6    9.76    0.50
  -1   6   6    7.94    0.58
   1  -6  -6   10.20    0.48
   1  -6  -6    8.25    0.60
   1  -6  -6    9.08    0.48
  -1  -6   6    9.92    0.50
   1  -6  -6    8.37    0.60
  -1  -6   6    7.41    0.62
  -1  -6   6    9.07    0.63
   2   6  -6    1.09    0.18
   2   6  -6    1.35    0.20
   2   6  -6    1.47    0.15
   2   6  -6    1.29    0.14
   2  -6  -6    1.43    0.11
   2  -6  -6    1.24    0.15
  -2  -6   6    1.59    0.16
  -2  -6   6    1.10    0.17
   2  -6  -6    1.58    0.11
  -2  -6   6    1.39    0.15
  -2  -6   6    1.23    0.19
   3   6  -6    1.21    0.20
   3   6  -6    1.16    0.18
   3   6  -6    1.79    0.18
  -3  -6   6    1.28    0.20
  -3  -6   6    1.87    0.18
   3  -6  -6    1.35    0.16
  -3  -6   6    1.00    0.18
   4   6  -6    0.07    0.13
   4   6  -6    0.09    0.17
   4   6  -6    0.11    0.11
  -4   6   6    0.10    0.09
  -4  -6   6    0.10    0.09
  -4  -6   6    0.09    0.11
  -4  -6   6    0.09    0.17
  -4  -6   6    0.07    0.13
   4  -6  -6    0.00    0.08
   4  -6  -6   -0.06    0.08
   4  -6  -6    0.04    0.10
   5   6  -6    6.53    0.44
   5   6  -6    7.60    0.61
  -5   6   6    5.83    0.44
   5  -6  -6    6.63    0.51
  -5  -6   6    7.65    0.59
  -5  -6   6    6.44    0.43
   5  -6  -6    6.67    0.41
  -5  -6   6    5.76    0.43
  -5  -6   6    5.86    0.55
   5  -6  -6    7.00    0.42
   6   6  -6   17.75    1.27
  -6   6   6   16.05    1.02
  -6  -6   6   18.29    1.27
   6  -6  -6   17.44    0.97
   6  -6  -6   16.79    0.97
   7   6  -6    3.73    0.56
  -7  -6   6    4.22    0.55
   7  -6  -6    3.22    0.36
   7  -6  -6    3.55    0.36
   6   7   6    0.09    0.26
  -6   7  -6    0.24    0.11
  -6   7  -6    0.14    0.11
   6  -7   6    0.11    0.13
  -6  -7  -6    0.00    0.24
   6  -7   6    0.22    0.13
   5   7   6   -0.10    0.21
  -5   7  -6    0.05    0.10
   5   7   6   -0.07    0.11
  -5   7  -6    0.02    0.10
  -5  -7  -6   -0.10    0.20
   5  -7   6    0.18    0.11
   5  -7   6   -0.03    0.11
  -5  -7  -6   -0.03    0.12
   5  -7   6    0.07    0.14
  -5  -7  -6   -0.06    0.11
   4   7   6    0.20    0.18
  -4   7  -6    0.06    0.09
   4   7   6   -0.03    0.13
   4   7   6    0.11    0.09
  -4   7  -6    0.04    0.08
   4   7   6   -0.03    0.09
   4  -7   6    0.12    0.09
   4  -7   6    0.05    0.16
  -4  -7  -6    0.13    0.11
  -4  -7  -6    0.06    0.11
   4  -7   6    0.09    0.09
  -4  -7  -6    0.14    0.16
  -3   7  -6   23.71    1.48
   3   7   6   21.10    1.52
   3   7   6   21.40    1.22
  -3   7  -6   23.79    1.48
   3   7   6   24.51    1.54
   3   7   6   22.18    1.22
  -3  -7  -6   23.29    1.23
  -3  -7  -6   23.09    1.54
   3  -7   6   24.49    1.20
   3  -7   6   22.70    1.21
   3  -7   6   22.43    1.31
   3  -7   6   21.77    1.50
  -3  -7  -6   21.66    1.22
  -2   7  -6    5.50    0.37
   2   7   6    4.69    0.31
  -2   7  -6    5.68    0.38
   2   7   6    4.87    0.32
   2   7   6    5.97    0.43
   2  -7   6    5.18    0.39
  -2  -7  -6    4.86    0.33
  -2  -7  -6    5.46    0.33
   2  -7   6    4.91    0.38
  -2  -7  -6    5.44    0.42
   2  -7   6    5.55    0.31
  -2  -7  -6    5.50    0.42
   2  -7   6    5.05    0.31
   1   7   6   26.37    1.86
   1   7   6   29.13    1.49
   1   7   6   25.78    1.86
   1   7   6   29.28    1.48
  -1   7  -6   28.47    1.85
  -1   7  -6   27.20    1.85
   1  -7   6   29.44    1.49
   1  -7   6   29.47    1.49
  -1  -7  -6   27.44    1.87
  -1  -7  -6   31.73    1.50
  -1  -7  -6   29.88    1.50
   1  -7   6   28.32    1.86
   0   7   6   14.87    0.91
   0   7  -6   13.48    0.92
   0   7   6   14.76    0.91
   0   7  -6   12.97    0.72
   0   7  -6   15.67    0.93
   0   7  -6   12.97    0.72
   0  -7   6   13.14    0.74
   0  -7  -6   12.69    0.73
   0  -7  -6   13.98    0.92
   0  -7   6   13.55    0.93
   0  -7   6   14.28    0.74
   0  -7   6   13.95    0.93
   0  -7  -6   12.89    0.73
   1   7  -6    4.92    0.29
   1   7  -6    5.01    0.29
   1   7  -6    4.35    0.39
  -1  -7   6    5.41    0.31
   1  -7  -6    4.90    0.27
   1  -7  -6    4.08    0.34
  -1  -7   6    4.88    0.38
   2   7  -6    0.46    0.14
   2   7  -6    0.62    0.10
   2   7  -6    0.51    0.13
   2   7  -6    0.54    0.09
   2  -7  -6    0.76    0.08
   2  -7  -6    0.70    0.08
  -2  -7   6    0.59    0.14
  -2  -7   6    0.56    0.13
  -2  -7   6    0.53    0.09
   2  -7  -6    0.73    0.07
  -2  -7   6    0.40    0.09
   2  -7  -6    0.84    0.12
   3   7  -6    0.35    0.13
   3   7  -6    0.22    0.10
   3   7  -6    0.20    0.08
   3   7  -6    0.32    0.15
   3  -7  -6    0.57    0.10
  -3  -7   6    0.17    0.09
  -3  -7   6    0.30    0.15
  -3  -7   6    0.17    0.10
   3  -7  -6    0.25    0.06
   3  -7  -6    0.16    0.06
  -3  -7   6    0.38    0.13
   4   7  -6   15.24    1.24
   4   7  -6   18.61    1.28
   4   7  -6   17.79    1.00
   4   7  -6   18.08    1.00
  -4  -7   6   19.11    1.27
   4  -7  -6   20.09    0.97
  -4  -7   6   18.95    1.01
   4  -7  -6   19.56    0.97
   4  -7  -6   16.47    1.21
  -5   7   6    0.06    0.11
   5   7  -6    0.19    0.22
   5   7  -6    0.04    0.11
  -5  -7   6    0.26    0.13
   5  -7  -6    0.16    0.13
  -5  -7   6    0.23    0.21
  -5  -7   6    0.12    0.14
   5  -7  -6    0.23    0.11
   5  -7  -6    0.12    0.10
  -6   7   6    0.59    0.16
   6   7  -6    0.68    0.27
  -6  -7   6    0.89    0.27
   6  -7  -6    0.85    0.16
   6  -7  -6    0.98    0.16
   7   7  -6    0.61    0.31
  -7  -7   6    0.61    0.30
   7  -7  -6    0.50    0.17
   7  -7  -6    0.31    0.17
   6   8   6    0.23    0.27
  -6  -8  -6    0.05    0.25
   6  -8   6    0.20    0.13
   6  -8   6    0.14    0.13
   5   8   6    1.91    0.32
   5   8   6    1.42    0.19
   5  -8   6    2.09    0.22
  -5  -8  -6    2.14    0.31
  -5  -8  -6    2.25    0.24
   5  -8   6    2.19    0.23
   4   8   6   61.12    3.08
   4   8   6   54.26    3.83
   4   8   6   52.64    3.07
   4  -8   6   63.78    3.06
  -4  -8  -6   64.23    3.85
   4  -8   6   58.26    3.06
   4  -8   6   58.12    3.81
  -4  -8  -6   58.81    3.09
   4  -8   6   60.98    3.27
  -4  -8  -6   57.05    3.08
   3   8   6    6.97    0.50
   3   8   6    5.43    0.46
   3   8   6    5.41    0.36
   3   8   6    5.31    0.36
   3  -8   6    5.12    0.43
   3  -8   6    5.45    0.43
  -3  -8  -6    6.22    0.49
   3  -8   6    5.62    0.34
  -3  -8  -6    5.77    0.38
  -3  -8  -6    5.49    0.38
   3  -8   6    6.15    0.34
  -2   8  -6   52.00    3.21
  -2   8  -6   51.95    3.21
   2   8   6   55.89    3.26
   2   8   6   46.07    2.60
   2   8   6   46.74    2.60
   2  -8   6   50.91    2.78
  -2  -8  -6   50.62    3.26
  -2  -8  -6   48.37    2.62
   2  -8   6   49.24    2.60
   2  -8   6   48.91    3.24
   2  -8   6   52.75    2.60
  -2  -8  -6   49.13    2.62
  -1   8  -6    1.59    0.15
   1   8   6    1.82    0.20
  -1   8  -6    1.38    0.15
   1   8   6    1.00    0.09
   1   8   6    1.35    0.17
  -1  -8  -6    1.23    0.18
   1  -8   6    1.24    0.13
   1  -8   6    1.30    0.17
   1  -8   6    1.05    0.12
  -1  -8  -6    1.01    0.12
  -1  -8  -6    1.14    0.12
   0   8   6    1.93    0.19
   0   8  -6    2.01    0.22
   0   8  -6    2.12    0.21
   0   8   6    1.74    0.19
   0  -8   6    2.40    0.17
   0  -8  -6    2.71    0.17
   0  -8   6    2.56    0.18
   0  -8  -6    2.06    0.21
   0  -8  -6    2.34    0.16
   0  -8   6    2.35    0.23
   1   8  -6   91.92    5.55
   1   8  -6   84.18    5.54
   1   8  -6   82.27    4.45
   1   8  -6   82.78    4.45
  -1  -8   6   87.11    4.46
   1  -8  -6   88.09    4.44
   1  -8  -6   87.40    5.53
  -1  -8   6   88.50    5.55
   1  -8  -6   84.90    4.44
   2   8  -6   15.44    0.91
   2   8  -6   16.48    1.15
   2   8  -6   16.36    0.91
   2  -8  -6   17.91    0.88
  -2  -8   6   17.03    0.92
  -2  -8   6   16.56    1.15
  -2  -8   6   16.81    0.92
   2  -8  -6   16.09    1.11
   2  -8  -6   17.71    0.88
   2  -8  -6   17.99    0.94
   3   8  -6    0.69    0.12
   3   8  -6    0.58    0.11
   3   8  -6    0.49    0.18
   3   8  -6    0.46    0.14
  -3  -8   6    0.57    0.11
   3  -8  -6    0.83    0.09
   3  -8  -6    0.64    0.07
  -3  -8   6    0.58    0.18
  -3  -8   6    0.59    0.12
   3  -8  -6    0.42    0.10
   4   8  -6    6.39    0.42
   4   8  -6    6.54    0.57
   4   8  -6    5.41    0.52
  -4  -8   6    6.52    0.56
  -4  -8   6    6.68    0.42
  -4  -8   6    6.48    0.43
   4  -8  -6    5.79    0.47
   4  -8  -6    6.85    0.37
   4  -8  -6    7.04    0.38
   5   8  -6    3.80    0.34
   5   8  -6    4.84    0.53
  -5  -8   6    4.98    0.51
  -5  -8   6    3.84    0.34
   5  -8  -6    4.56    0.31
   5  -8  -6    4.37    0.31
   6   8  -6    1.51    0.31
  -6  -8   6    1.56    0.32
   6  -8  -6    1.25    0.17
   6  -8  -6    1.18    0.17
   6   9   6   21.38    1.44
  -6  -9  -6   20.12    1.43
   6  -9   6   17.85    1.08
   6  -9   6   19.33    1.09
   5   9   6   12.14    0.92
   5  -9   6   11.94    0.67
  -5  -9  -6   11.72    0.91
   5  -9   6   10.52    0.66
   4   9   6    0.32    0.16
   4   9   6    1.03    0.24
   4   9   6    0.13    0.10
   4  -9   6    0.30    0.10
   4  -9   6    0.32    0.18
   4  -9   6    0.38    0.10
   4  -9   6    0.36    0.12
  -4  -9  -6    0.15    0.11
  -4  -9  -6    0.52    0.21
  -4  -9  -6    0.40    0.14
   3   9   6    2.33    0.32
   3   9   6    1.54    0.17
  -3  -9  -6    1.56    0.23
  -3  -9  -6    1.87    0.19
   3  -9   6    1.71    0.23
   3  -9   6    1.75    0.17
  -3  -9  -6    2.12    0.21
   3  -9   6    1.69    0.16
   3  -9   6    1.60    0.21
   2   9   6   39.52    2.79
   2   9   6   43.10    2.79
   2   9   6   40.57    2.23
   2  -9   6   40.78    2.77
  -2  -9  -6   43.29    2.80
   2  -9   6   43.94    2.23
  -2  -9  -6   42.18    2.25
  -2  -9  -6   44.65    2.25
   2  -9   6   46.39    2.23
   2  -9   6   44.67    2.39
   1   9   6   49.44    3.21
  -1   9  -6   51.94    3.19
  -1   9  -6   50.83    3.19
   1   9   6   53.36    3.21
   1  -9   6   46.85    2.57
  -1  -9  -6   46.66    2.58
   1  -9   6   48.02    3.21
  -1  -9  -6   48.65    2.58
  -1  -9  -6   50.79    3.22
   1  -9   6   50.60    2.58
   0   9   6  102.49    6.35
   0   9   6   99.66    6.35
   0   9  -6   98.65    6.37
   0   9  -6   99.54    6.36
   0  -9  -6  100.11    6.37
   0  -9  -6   96.77    5.12
   0  -9   6   99.62    6.37
   0  -9  -6  101.16    5.12
   0  -9   6   96.82    5.12
   0  -9   6   99.09    5.13
   1   9  -6    0.73    0.08
   1   9  -6    0.52    0.15
   1   9  -6    0.46    0.13
  -1  -9   6    0.64    0.11
  -1  -9   6    0.50    0.13
   1  -9  -6    0.68    0.10
   1  -9  -6    0.90    0.09
   1  -9  -6    0.74    0.07
   2   9  -6    4.71    0.43
   2   9  -6    4.74    0.31
  -2  -9   6    4.65    0.42
   2  -9  -6    4.27    0.35
  -2  -9   6    5.24    0.33
   2  -9  -6    5.70    0.32
  -2  -9   6    5.22    0.33
   3   9  -6   47.61    2.62
   3   9  -6   47.44    2.62
   3   9  -6   45.74    3.26
   3   9  -6   55.40    3.28
  -3  -9   6   52.48    3.28
   3  -9  -6   52.15    2.58
  -3  -9   6   51.08    2.63
  -3  -9   6   49.81    2.63
   3  -9  -6   51.93    2.58
   3  -9  -6   47.90    3.22
   4   9  -6   40.40    2.46
   4   9  -6   36.14    1.95
   4   9  -6   32.95    1.95
   4   9  -6   31.35    2.42
  -4  -9   6   35.94    1.96
   4  -9  -6   40.19    1.91
  -4  -9   6   37.95    2.45
   4  -9  -6   39.48    1.91
  -4  -9   6   36.15    1.95
   5   9  -6   18.74    1.35
   5  -9  -6   18.91    1.01
   5  -9  -6   18.47    1.01
  -5  -9   6   18.65    1.34
   6   9  -6    0.54    0.29
   6  -9  -6    1.05    0.16
  -6  -9   6    0.68    0.28
   6  -9  -6    0.81    0.15
   6  10   6    2.20    0.38
   6 -10   6    1.98    0.22
  -6 -10  -6    1.93    0.36
   6 -10   6    1.84    0.21
   5  10   6    6.50    0.63
   5 -10   6    6.69    0.42
   5 -10   6    6.04    0.41
  -5 -10  -6    6.48    0.63
   4  10   6    5.43    0.39
   4  10   6    5.77    0.58
  -4 -10  -6    5.80    0.43
   4 -10   6    6.20    0.38
  -4 -10  -6    6.29    0.43
   4 -10   6    6.91    0.50
  -4 -10  -6    6.14    0.57
   4 -10   6    5.63    0.47
   4 -10   6    7.18    0.38
   3  10   6  102.81    6.37
  -3 -10  -6   96.63    6.37
   3 -10   6  103.59    5.09
   3 -10   6   98.47    5.09
   3 -10   6  104.44    5.41
   3 -10   6   88.60    6.33
  -3 -10  -6   98.84    5.12
  -3 -10  -6   96.88    5.12
   2  10   6   22.47    1.43
   2  10   6   20.34    1.42
  -2 -10  -6   21.38    1.44
  -2 -10  -6   21.93    1.15
   2 -10   6   18.88    1.40
   2 -10   6   21.51    1.12
   2 -10   6   21.85    1.24
   2 -10   6   23.26    1.13
  -2 -10  -6   20.33    1.15
   1  10   6    7.07    0.51
   1  10   6    6.89    0.50
  -1  10  -6    7.00    0.47
  -1  10  -6    7.38    0.48
   1 -10   6    6.83    0.51
   1 -10   6    6.88    0.40
  -1 -10  -6    6.92    0.52
  -1 -10  -6    6.99    0.42
   1 -10   6    7.45    0.41
  -1 -10  -6    6.47    0.42
   0  10   6   45.03    2.97
   0  10  -6   46.44    2.99
   0  10  -6   46.05    3.00
   0  10   6   47.25    2.97
   0 -10   6   46.69    3.01
   0 -10   6   47.36    2.42
   0 -10  -6   44.92    2.41
   0 -10  -6   48.15    2.41
   0 -10  -6   46.60    3.00
   0 -10   6   45.32    2.41
   1  10  -6   22.48    1.51
   1  10  -6   21.34    1.50
  -1 -10   6   23.68    1.22
   1 -10  -6   25.16    1.18
   1 -10  -6   23.04    1.18
  -1 -10   6   22.58    1.21
  -1 -10   6   22.23    1.51
   1 -10  -6   21.11    1.48
   2  10  -6  177.01    9.64
   2  10  -6  176.63   11.99
   2  10  -6  199.92   12.00
  -2 -10   6  192.66    9.66
   2 -10  -6  173.92   11.96
  -2 -10   6  183.80    9.65
   2 -10  -6  201.48   10.13
  -2 -10   6  194.63   12.00
   3  10  -6    2.30    0.28
   3  10  -6    1.71    0.19
   3  10  -6    1.62    0.24
   3 -10  -6    2.11    0.19
  -3 -10   6    1.94    0.23
  -3 -10   6    2.14    0.28
  -3 -10   6    1.94    0.23
   4  10  -6    2.19    0.31
   4  10  -6    2.09    0.23
  -4 -10   6    2.38    0.25
  -4 -10   6    2.41    0.32
  -4 -10   6    2.38    0.26
   4 -10  -6    2.20    0.17
   4 -10  -6    2.20    0.17
   5  10  -6   14.67    1.05
  -5 -10   6   13.44    1.03
   5 -10  -6   13.29    0.74
   5 -10  -6   12.69    0.74
   6  10  -6    6.65    0.72
   6 -10  -6    6.76    0.45
   6 -10  -6    6.51    0.45
  -6 -10   6    7.35    0.71
   6  11   6    2.60    0.41
   6 -11   6    2.43    0.28
   6 -11   6    2.52    0.29
  -6 -11  -6    2.54    0.40
   5  11   6   14.31    1.11
  -5 -11  -6   14.65    1.11
   5 -11   6   14.81    0.82
   5 -11   6   14.17    0.82
   5 -11   6   15.09    0.94
   4  11   6   12.58    0.98
  -4 -11  -6   13.77    0.76
   4 -11   6   12.88    0.72
  -4 -11  -6   12.34    0.76
   4 -11   6   13.56    0.72
  -4 -11  -6   11.62    0.96
   4 -11   6   13.49    0.84
   3  11   6    0.73    0.20
   3  11   6    0.48    0.16
   3 -11   6    0.46    0.09
   3 -11   6    0.24    0.16
   3 -11   6    0.80    0.14
  -3 -11  -6    0.44    0.14
  -3 -11  -6    0.40    0.13
  -3 -11  -6    0.54    0.19
   3 -11   6    0.43    0.10
   2  11   6    6.96    0.55
   2  11   6    6.28    0.52
   2 -11   6    7.35    0.40
  -2 -11  -6    7.60    0.44
   2 -11   6    7.07    0.40
   2 -11   6    7.42    0.51
  -2 -11  -6    6.22    0.43
  -2 -11  -6    6.85    0.55
   2 -11   6    6.31    0.50
   1  11   6   62.03    4.20
   1  11   6   61.20    4.20
   1 -11   6   67.86    3.38
  -1 -11  -6   71.89    3.40
  -1 -11  -6   64.60    3.39
  -1 -11  -6   61.83    4.22
   1 -11   6   70.90    3.39
   1 -11   6   62.67    4.21
   0  11  -6    6.31    0.47
   0  11  -6    5.58    0.47
   0 -11  -6    6.27    0.48
   0 -11  -6    7.45    0.39
   0 -11  -6    6.53    0.38
   0 -11   6    6.85    0.40
   0 -11   6    7.18    0.40
   0 -11   6    6.19    0.49
   1  11  -6    3.13    0.33
   1  11  -6    3.04    0.31
   1 -11  -6    3.25    0.21
  -1 -11   6    3.02    0.32
  -1 -11   6    3.23    0.26
  -1 -11   6    3.80    0.26
   1 -11  -6    3.85    0.21
   1 -11  -6    3.13    0.27
   2  11  -6    8.83    0.69
   2  11  -6    8.16    0.67
   2 -11  -6    9.74    0.55
  -2 -11   6    9.86    0.55
  -2 -11   6    9.01    0.55
  -2 -11   6    8.99    0.69
   3  11  -6    0.42    0.20
   3 -11  -6    0.44    0.11
  -3 -11   6    0.55    0.19
  -3 -11   6    0.35    0.13
  -3 -11   6    0.46    0.12
   4  11  -6   22.06    1.54
   4 -11  -6   23.40    1.16
   4 -11  -6   22.80    1.16
  -4 -11   6   21.83    1.54
  -4 -11   6   21.37    1.22
  -4 -11   6   21.06    1.22
   5  11  -6    0.52    0.28
  -5 -11   6    0.43    0.25
   5 -11  -6    0.59    0.11
   5 -11  -6    0.55    0.11
   6  11  -6    1.38    0.34
  -6 -11   6    1.07    0.32
   6 -11  -6    1.25    0.17
   6 -11  -6    1.16    0.17
   5  12   6    0.13    0.26
   5 -12   6    0.20    0.21
   5 -12   6    0.03    0.11
   5 -12   6    0.13    0.12
   4  12   6    1.68    0.28
  -4 -12  -6    1.03    0.20
   4 -12   6    0.85    0.13
   4 -12   6    1.30    0.14
  -4 -12  -6    1.51    0.28
   4 -12   6    0.84    0.23
   3  12   6    2.05    0.30
   3  12   6    2.52    0.36
   3 -12   6    1.83    0.26
  -3 -12  -6    2.52    0.31
   3 -12   6    2.05    0.19
  -3 -12  -6    2.00    0.22
   3 -12   6    2.55    0.20
  -3 -12  -6    1.80    0.21
   2  12   6   13.13    0.88
  -2 -12  -6   12.14    0.72
  -2 -12  -6   13.36    0.91
  -2 -12  -6   12.16    0.72
   2 -12   6   13.27    0.69
   2 -12   6   11.93    0.69
   2 -12   6   12.43    0.81
   2 -12   6   12.38    0.86
   1  12   6    9.01    0.59
   1  12   6    8.43    0.58
   1 -12   6    7.99    0.47
  -1 -12  -6    7.70    0.49
   1 -12   6    8.23    0.48
  -1 -12  -6    8.31    0.49
  -1 -12  -6    8.10    0.61
   1 -12   6    8.06    0.59
   0  12  -6    1.25    0.16
   0  12  -6    1.43    0.17
   0 -12  -6    1.87    0.17
   0 -12  -6    1.38    0.18
   0 -12   6    1.44    0.19
   0 -12  -6    1.80    0.17
   0 -12   6    1.61    0.16
   0 -12   6    1.46    0.15
   1 -12  -6    0.63    0.09
  -1 -12   6    0.61    0.11
  -1 -12   6    1.07    0.18
   1 -12  -6    1.20    0.17
  -1 -12   6    0.57    0.13
   1 -12  -6    0.78    0.09
   2  12  -6    0.53    0.18
   2  12  -6    0.26    0.15
  -2 -12   6    0.19    0.11
  -2 -12   6    0.17    0.12
   2 -12  -6    0.34    0.11
  -2 -12   6    0.22    0.16
   3  12  -6    0.34    0.21
   3  12  -6    0.08    0.15
  -3 -12   6    0.06    0.11
  -3 -12   6    0.01    0.12
  -3 -12   6    0.22    0.18
   3 -12  -6    0.09    0.10
   4  12  -6   -0.01    0.21
   4 -12  -6    0.11    0.07
  -4 -12   6    0.10    0.14
  -4 -12   6    0.04    0.20
   5  12  -6    7.71    0.67
   5 -12  -6    5.42    0.37
  -5 -12   6    6.38    0.63
   5 -12  -6    5.74    0.37
   5 -13   6    5.07    0.38
   5 -13   6    6.48    0.40
   5 -13   6    5.88    0.54
   4  13   6    3.78    0.47
   4 -13   6    2.74    0.34
  -4 -13  -6    2.51    0.29
   4 -13   6    3.37    0.25
   4 -13   6    2.94    0.25
   3  13   6   -0.23    0.18
   3  13   6   -0.10    0.14
   3 -13   6    0.19    0.09
   3 -13   6    0.07    0.09
  -3 -13  -6   -0.17    0.14
  -3 -13  -6   -0.16    0.13
   3 -13   6    0.00    0.18
  -3 -13  -6    0.02    0.18
   2  13   6   14.35    1.00
   2  13   6   15.82    1.02
  -2 -13  -6   13.70    0.82
   2 -13   6   14.33    0.91
  -2 -13  -6   15.26    0.83
   2 -13   6   15.10    0.79
   2 -13   6   14.38    0.79
  -2 -13  -6   14.45    1.03
   2 -13   6   13.62    0.99
   1  13   6   54.10    3.60
   1  13   6   57.10    3.60
  -1 -13  -6   55.47    2.92
  -1 -13  -6   54.01    3.63
   1 -13   6   56.32    2.91
   1 -13   6   59.09    2.91
  -1 -13  -6   59.47    2.92
   1 -13   6   51.93    3.61
   0  13  -6   24.28    1.59
   0  13  -6   25.78    1.60
   0 -13   6   23.53    1.63
   0 -13   6   23.97    1.31
   0 -13  -6   22.86    1.62
   0 -13   6   25.73    1.31
   0 -13  -6   24.05    1.30
   0 -13  -6   25.98    1.30
   1  13  -6   -0.05    0.12
   1  13  -6   -0.02    0.14
  -1 -13   6    0.04    0.11
  -1 -13   6    0.17    0.14
  -1 -13   6    0.02    0.10
   1 -13  -6    0.01    0.07
   1 -13  -6   -0.04    0.07
   2  13  -6    1.19    0.19
   2  13  -6    1.63    0.24
   2 -13  -6    1.11    0.16
  -2 -13   6    1.06    0.21
  -2 -13   6    1.04    0.16
  -2 -13   6    1.16    0.17
  -3 -13   6    1.47    0.20
  -3 -13   6    0.92    0.16
  -3 -13   6    1.95    0.27
   3 -13  -6    1.29    0.17
   4  13  -6    6.65    0.65
  -4 -13   6    6.08    0.61
   5  13  -6    2.40    0.37
   5 -13  -6    1.97    0.20
   5 -13  -6    1.94    0.19
   4  14   6    4.24    0.52
   4 -14   6    3.67    0.30
   4 -14   6    4.41    0.30
   4 -14   6    3.88    0.44
   3  14   6   30.77    2.02
  -3 -14  -6   30.93    1.64
   3 -14   6   31.37    1.59
   3 -14   6   29.69    1.75
  -3 -14  -6   27.92    1.63
   3 -14   6   29.88    1.59
   2  14   6    0.70    0.15
   2  14   6    0.82    0.18
   2 -14   6    0.46    0.11
  -2 -14  -6    0.47    0.14
  -2 -14  -6    0.44    0.14
   2 -14   6    0.40    0.19
   2 -14   6    0.65    0.11
   1  14   6    4.27    0.33
   1  14   6    4.49    0.34
  -1 -14  -6    3.95    0.32
   1 -14   6    3.96    0.37
   1 -14   6    4.14    0.30
   1 -14   6    4.28    0.30
  -1 -14  -6    4.04    0.40
  -1 -14  -6    4.08    0.32
   0 -14   6   11.05    0.80
   0 -14  -6   10.68    0.79
   0 -14   6   11.14    0.64
   0 -14  -6   11.75    0.64
   0 -14  -6   10.94    0.63
   0 -14   6   11.67    0.65
   1  14  -6   26.24    1.66
   1  14  -6   23.42    1.64
  -1 -14   6   26.36    1.35
  -1 -14   6   23.65    1.68
   1 -14  -6   26.08    1.31
  -1 -14   6   24.31    1.35
   1 -14  -6   24.53    1.31
   2  14  -6   31.12    1.92
   2  14  -6   26.98    1.90
  -2 -14   6   26.91    1.54
   2 -14  -6   28.19    1.61
  -2 -14   6   29.28    1.55
   2 -14  -6   29.50    1.48
   2 -14  -6   28.42    1.49
   3  14  -6   10.49    0.81
  -3 -14   6    9.74    0.64
   3 -14  -6   10.71    0.63
  -3 -14   6    9.79    0.63
   4  14  -6    0.76    0.28
   4  15   6    0.25    0.24
   4 -15   6    0.34    0.11
   4 -15   6   -0.01    0.22
   4 -15   6    0.20    0.11
   3  15   6    6.95    0.57
  -3 -15  -6    5.99    0.46
   3 -15   6    6.27    0.54
  -3 -15  -6    5.86    0.46
   3 -15   6    5.81    0.38
   3 -15   6    5.79    0.38
   2  15   6    7.94    0.66
   2  15   6    8.64    0.68
  -2 -15  -6    9.43    0.58
   2 -15   6    9.66    0.54
   2 -15   6   10.52    0.68
  -2 -15  -6    8.92    0.58
   2 -15   6    9.65    0.54
   1 -15   6   51.51    2.72
  -1 -15  -6   50.11    2.73
  -1 -15  -6   53.16    2.73
   1 -15   6   53.76    2.73
   0 -15  -6    7.62    0.47
   0 -15   6    7.74    0.49
   0 -15  -6    8.10    0.48
   1  15  -6   23.04    1.52
   1  15  -6   20.94    1.50
   1 -15  -6   22.50    1.21
   1 -15  -6   24.15    1.21
  -1 -15   6   23.93    1.25
  -1 -15   6   22.03    1.24
   2  15  -6   29.89    1.88
   2  15  -6   25.86    1.85
   2 -15  -6   27.57    1.46
   2 -15  -6   29.44    1.45
   2 -15  -6   27.38    1.58
  -2 -15   6   28.95    1.52
  -2 -15   6   26.26    1.51
   3  15  -6    4.43    0.49
   3 -15  -6    4.40    0.34
  -3 -15   6    3.52    0.37
   4  15  -6   18.18    1.34
   3  16   6   10.94    0.85
   3 -16   6   11.60    0.64
   3 -16   6   11.40    0.64
   3 -16   6   11.63    0.80
  -3 -16  -6   10.43    0.71
   2  16   6    1.30    0.20
   2  16   6    1.25    0.22
  -2 -16  -6    1.87    0.22
   2 -16   6    2.06    0.21
   2 -16   6    1.99    0.22
   2 -16   6    1.90    0.29
  -2 -16  -6    2.08    0.23
   1 -16   6    1.92    0.19
  -1 -16  -6    1.78    0.20
   1 -16   6    1.91    0.22
  -1 -16  -6    1.78    0.20
   0 -16   6    0.31    0.13
   0 -16  -6    0.44    0.12
   0 -16  -6    0.41    0.13
   0 -16   6    0.24    0.13
   1  16  -6    0.18    0.12
   1  16  -6    0.30    0.14
  -1 -16   6    0.36    0.14
   1 -16  -6    0.23    0.11
  -1 -16   6    0.38    0.14
   1 -16  -6    0.16    0.10
   2  16  -6    4.49    0.48
   2  16  -6    4.51    0.43
   2 -16  -6    5.04    0.31
  -2 -16   6    4.82    0.40
  -2 -16   6    5.24    0.40
   2 -16  -6    5.44    0.31
   2 -16  -6    5.45    0.40
   3  16  -6   -0.02    0.22
  -3 -16   6    0.23    0.17
   3 -16  -6    0.25    0.15
   2  17   6    0.89    0.15
  -2 -17  -6    0.47    0.17
   2 -17   6    0.46    0.13
   2 -17   6    0.65    0.13
  -2 -17  -6    0.36    0.17
   2 -17   6    0.74    0.25
  -1 -17  -6   -0.09    0.13
   1 -17   6    0.07    0.12
  -1 -17  -6   -0.10    0.14
   1 -17   6    0.02    0.11
   0 -17   6    0.04    0.13
   0 -17  -6    0.17    0.13
   0 -17  -6    0.00    0.13
   1 -17  -6    1.45    0.15
  -1 -17   6    1.29    0.19
   1 -17  -6    1.49    0.16
  -1 -17   6    1.27    0.20
   2  17  -6    0.43    0.20
   2 -17  -6    0.52    0.16
   2 -17  -6    0.29    0.09
  -2 -17   6    0.30    0.16
   2 -17  -6    0.24    0.10
  -2 -17   6    0.24    0.16
  -1 -18  -6    6.09    0.45
  -1 -18  -6    5.75    0.44
   1 -18   6    6.15    0.42
   0 -18  -6    5.04    0.38
   0 -18   6    4.76    0.38
   0 -18  -6    4.93    0.37
   0 -18   6    4.59    0.38
  -1 -18   6    2.36    0.25
   1 -18  -6    2.07    0.24
   1 -18  -6    2.31    0.21
  -1 -18   6    2.36    0.25
  -7   0  -7    0.39    0.23
   6   0   7   -0.04    0.18
   6   0   7    0.11    0.14
  -6   0  -7    0.16    0.19
   6   0   7    0.10    0.13
   5   0   7   -0.16    0.10
   5   0   7   -0.11    0.15
  -5   0  -7   -0.03    0.07
  -5   0  -7   -0.08    0.06
  -5   0  -7   -0.19    0.15
   5   0   7   -0.04    0.11
  -5   0  -7   -0.02    0.12
   4   0   7    0.11    0.09
  -4   0  -7    0.25    0.09
  -4   0  -7    0.27    0.09
   4   0   7    0.17    0.10
   4   0   7    0.29    0.15
  -4   0  -7    0.19    0.12
  -4   0  -7    0.34    0.14
  -3   0  -7    0.46    0.09
   3   0   7    0.23    0.10
  -3   0  -7    0.38    0.09
  -3   0  -7    0.32    0.10
   3   0   7    0.32    0.08
  -3   0  -7    0.56    0.13
  -3   0  -7    0.38    0.12
   3   0   7    0.24    0.08
   3   0   7    0.26    0.12
   2   0   7   -0.02    0.06
   2   0   7   -0.01    0.06
  -2   0  -7   -0.02    0.08
  -2   0  -7   -0.01    0.08
   2   0   7   -0.01    0.08
  -2   0  -7   -0.05    0.05
  -2   0  -7   -0.03    0.06
  -2   0  -7   -0.09    0.07
   2   0   7   -0.05    0.08
  -1   0  -7   -0.08    0.04
  -1   0  -7   -0.12    0.06
   1   0   7   -0.01    0.05
   1   0   7   -0.07    0.06
   1   0   7   -0.02    0.07
   1   0   7   -0.11    0.04
  -1   0  -7   -0.03    0.08
  -1   0  -7   -0.05    0.06
   1   0   7    0.20    0.08
  -1   0  -7   -0.06    0.04
   0   0  -7    0.00    0.06
   0   0   7    0.09    0.05
   0   0  -7    0.01    0.05
   0   0  -7   -0.01    0.07
   0   0   7    0.00    0.06
   0   0   7   -0.03    0.04
   0   0  -7   -0.07    0.04
   0   0   7   -0.01    0.06
   0   0   7   -0.02    0.04
   1   0  -7    0.41    0.09
   1   0  -7    0.15    0.05
  -1   0   7    0.06    0.04
  -1   0   7    0.07    0.08
   1   0  -7    0.20    0.08
  -1   0   7    0.05    0.07
   1   0  -7    0.13    0.05
   2   0  -7    0.09    0.06
   2   0  -7    0.20    0.09
  -2   0   7    0.26    0.06
  -2   0   7    0.17    0.05
  -2   0   7    0.23    0.10
  -2   0   7    0.10    0.08
   2   0  -7    0.13    0.10
  -3   0   7    0.16    0.11
   3   0  -7    0.07    0.07
   3   0  -7    0.01    0.07
  -3   0   7    0.13    0.06
  -3   0   7    0.11    0.06
   3   0  -7    0.17    0.11
   3   0  -7    0.15    0.11
  -4   0   7    0.05    0.14
   4   0  -7    0.08    0.09
  -4   0   7    0.07    0.10
  -4   0   7    0.27    0.08
   4   0  -7   -0.04    0.13
   4   0  -7    0.05    0.10
   5   0  -7   -0.04    0.11
  -5   0   7    0.01    0.12
   5   0  -7    0.19    0.16
  -5   0   7    0.11    0.16
   5   0  -7    0.12    0.12
  -6   0   7   -0.08    0.18
   6   0  -7    0.00    0.13
   6   0  -7    0.15    0.14
   6   0  -7   -0.10    0.18
  -7   0   7    0.42    0.23
  -7   1  -7    9.80    0.80
  -7  -1  -7    9.82    0.82
  -6   1  -7    0.32    0.21
   6   1   7    0.37    0.14
   6   1   7    0.47    0.22
   6   1   7    0.20    0.12
   6  -1   7    0.41    0.14
   6  -1   7    0.53    0.15
  -6  -1  -7    0.60    0.22
   6  -1   7    0.25    0.20
   5   1   7    2.00    0.24
   5   1   7    2.67    0.35
  -5   1  -7    2.09    0.28
  -5   1  -7    2.58    0.33
  -5   1  -7    2.37    0.27
   5   1   7    1.87    0.20
  -5  -1  -7    2.20    0.27
   5  -1   7    2.09    0.25
   5  -1   7    2.19    0.24
  -5  -1  -7    2.08    0.21
  -5  -1  -7    2.10    0.27
  -5  -1  -7    2.49    0.34
   4   1   7    3.98    0.29
   4   1   7    4.23    0.30
  -4   1  -7    4.00    0.27
   4   1   7    3.86    0.39
  -4   1  -7    3.87    0.27
  -4   1  -7    3.43    0.33
  -4   1  -7    4.77    0.38
   4  -1   7    4.02    0.29
   4  -1   7    4.34    0.38
  -4  -1  -7    3.85    0.28
  -4  -1  -7    3.74    0.37
  -4  -1  -7    3.80    0.33
   4  -1   7    4.02    0.29
  -4  -1  -7    3.73    0.28
  -4  -1  -7    4.14    0.39
   3   1   7   13.58    1.01
  -3   1  -7   15.10    0.81
   3   1   7   16.26    1.03
  -3   1  -7   14.47    0.87
  -3   1  -7   16.42    1.02
   3   1   7   15.20    0.82
   3   1   7   14.41    0.82
  -3   1  -7   14.43    0.81
   3  -1   7   15.02    0.82
  -3  -1  -7   14.46    0.87
   3  -1   7   15.49    0.82
  -3  -1  -7   15.54    0.82
  -3  -1  -7   14.62    1.02
  -3  -1  -7   14.92    0.81
   3  -1   7   14.23    1.01
  -3  -1  -7   15.25    1.02
   3  -1   7   15.53    1.02
   2   1   7   53.87    3.48
  -2   1  -7   56.56    2.80
   2   1   7   54.25    2.80
  -2   1  -7   57.68    3.48
  -2   1  -7   52.38    2.95
  -2   1  -7   53.86    2.79
   2   1   7   54.40    2.80
  -2   1  -7   53.45    3.48
  -2  -1  -7   57.37    2.80
   2  -1   7   54.32    3.48
  -2  -1  -7   53.13    3.48
  -2  -1  -7   50.16    3.48
   2  -1   7   53.46    2.80
   2  -1   7   53.48    3.48
  -2  -1  -7   55.34    2.80
   2  -1   7   52.71    2.80
  -2  -1  -7   51.14    2.95
   1   1   7  107.83    5.37
   1   1   7  105.43    6.67
   1   1   7   98.69    6.67
  -1   1  -7  100.60    6.67
  -1   1  -7  103.33    6.67
  -1   1  -7  100.53    5.64
  -1   1  -7  105.25    5.36
  -1   1  -7  107.93    5.37
  -1  -1  -7   99.64    6.67
   1  -1   7  105.86    6.67
  -1  -1  -7  112.67    5.37
   1  -1   7   97.63    6.67
   1  -1   7  106.86    5.37
   1  -1   7  105.81    5.37
  -1  -1  -7  105.67    6.67
   1  -1   7  104.19    5.65
  -1  -1  -7  103.33    5.64
   0   1   7   71.91    3.64
   0   1  -7   66.45    4.53
   0   1  -7   72.64    4.54
   0   1   7   70.51    4.53
   0   1   7   68.41    3.82
   0   1   7   68.66    4.53
   0   1   7   69.97    3.64
   0   1  -7   71.75    3.65
   0  -1   7   71.12    3.83
   0  -1  -7   71.10    3.65
   0  -1   7   73.71    3.65
   0  -1   7   74.34    4.54
   0  -1   7   67.09    4.53
   0  -1  -7   73.74    4.54
   0  -1  -7   72.19    3.65
   0  -1  -7   65.86    4.53
  -1   1   7    0.27    0.08
  -1   1   7    0.06    0.05
  -1   1   7    0.28    0.05
   1   1  -7    0.23    0.09
   1   1  -7    0.27    0.06
   1   1  -7    0.50    0.09
  -1   1   7    0.26    0.04
   1   1  -7    0.09    0.05
   1  -1  -7    0.13    0.07
   1  -1  -7    0.18    0.08
  -1  -1   7    0.21    0.07
  -1  -1   7    0.19    0.06
   1  -1  -7    0.21    0.06
   1  -1  -7    0.15    0.05
  -1  -1   7    0.15    0.08
   2   1  -7   15.16    1.07
  -2   1   7   16.05    0.85
  -2   1   7   15.62    0.85
  -2   1   7   16.96    1.07
   2   1  -7   15.66    0.86
   2   1  -7   16.65    1.07
  -2  -1   7   16.26    1.07
   2  -1  -7   17.36    1.07
  -2  -1   7   15.89    0.85
   2  -1  -7   16.01    0.86
   2  -1  -7   15.38    1.06
  -2  -1   7   15.38    0.85
  -2  -1   7   15.73    1.07
  -3   1   7   13.16    0.75
  -3   1   7   13.57    0.75
  -3   1   7   14.62    0.95
   3   1  -7   13.45    0.77
  -3   1   7   15.70    0.96
   3   1  -7   12.93    0.96
   3   1  -7   15.46    0.97
   3   1  -7   13.08    0.77
  -3  -1   7   13.32    0.76
   3  -1  -7   14.21    0.77
  -3  -1   7   12.89    0.76
   3  -1  -7   13.61    0.95
   3  -1  -7   15.67    0.96
  -3  -1   7   15.20    0.96
   3  -1  -7   13.56    0.76
  -3  -1   7   13.90    0.96
   4   1  -7   39.26    2.08
  -4   1   7   37.80    2.58
   4   1  -7   40.81    2.08
   4   1  -7   41.53    2.60
  -4   1   7   42.90    2.59
  -4   1   7   36.96    2.06
  -4  -1   7   41.54    2.60
  -4  -1   7   37.47    2.07
   4  -1  -7   40.09    2.59
  -4  -1   7   37.64    2.07
   4  -1  -7   38.43    2.08
   4  -1  -7   41.00    2.08
   5   1  -7    2.64    0.28
  -5   1   7    2.69    0.31
   5   1  -7    2.42    0.36
  -5   1   7    3.20    0.36
   5   1  -7    2.82    0.29
  -5  -1   7    3.35    0.38
   5  -1  -7    2.76    0.28
   5  -1  -7    3.03    0.35
   5  -1  -7    2.87    0.28
   6   1  -7    0.63    0.15
   6   1  -7    0.69    0.22
  -6   1   7    0.61    0.17
  -6   1   7    0.63    0.21
   6   1  -7    0.50    0.15
   6  -1  -7    0.59    0.21
  -6  -1   7    0.68    0.23
   6  -1  -7    0.62    0.15
   6  -1  -7    0.52    0.16
  -7   1   7    3.03    0.43
   7  -1  -7    1.91    0.25
  -7  -1   7    3.57    0.47
  -7   2  -7    8.13    0.70
  -7  -2  -7    7.83    0.72
   6   2   7    6.65    0.58
   6   2   7    5.51    0.42
  -6   2  -7    6.26    0.55
   6   2   7    5.21    0.43
   6  -2   7    5.17    0.42
   6  -2   7    5.78    0.43
  -6  -2  -7    7.06    0.58
   6  -2   7    6.34    0.55
  -5   2  -7   12.16    0.81
   5   2   7   12.86    0.76
  -5   2  -7   12.65    0.93
   5   2   7   13.70    0.97
   5   2   7   13.05    0.76
  -5   2  -7   14.04    0.95
   5  -2   7   13.69    0.95
  -5  -2  -7   14.57    0.97
  -5  -2  -7   12.78    0.82
   5  -2   7   14.26    0.76
  -5  -2  -7   13.17    0.75
  -5  -2  -7   12.16    0.74
  -5  -2  -7   12.29    0.94
   5  -2   7   13.57    0.76
   4   2   7   21.83    1.47
  -4   2  -7   21.22    1.15
  -4   2  -7   21.40    1.45
  -4   2  -7   23.38    1.46
  -4   2  -7   20.84    1.25
   4   2   7   18.86    1.46
   4   2   7   21.91    1.18
   4   2   7   22.55    1.18
  -4  -2  -7   22.19    1.17
   4  -2   7   22.07    1.17
   4  -2   7   21.86    1.46
  -4  -2  -7   21.22    1.17
  -4  -2  -7   21.29    1.47
  -4  -2  -7   23.00    1.47
   4  -2   7   22.65    1.17
  -3   2  -7  260.01   15.79
  -3   2  -7  243.30   13.35
   3   2   7  226.01   15.76
  -3   2  -7  246.94   12.70
   3   2   7  264.63   15.78
   3   2   7  248.28   12.69
   3   2   7  236.99   12.69
  -3   2  -7  242.82   12.73
  -3  -2  -7  246.56   12.69
   3  -2   7  260.29   12.68
  -3  -2  -7  244.06   12.68
   3  -2   7  248.66   12.76
   3  -2   7  251.07   15.77
  -3  -2  -7  253.87   15.77
   3  -2   7  241.83   15.77
  -3  -2  -7  235.09   15.77
   2   2   7   49.56    3.36
  -2   2  -7   51.67    3.36
   2   2   7   54.88    2.71
  -2   2  -7   54.03    2.70
  -2   2  -7   49.96    2.85
   2   2   7   51.21    3.36
  -2   2  -7   52.89    2.70
   2  -2   7   54.14    2.70
  -2  -2  -7   54.78    2.71
  -2  -2  -7   53.12    3.37
  -2  -2  -7   50.49    3.36
   2  -2   7   52.82    2.70
   2  -2   7   48.16    3.36
   2  -2   7   51.16    2.85
   2  -2   7   52.48    3.36
  -1   2  -7  102.47    5.15
  -1   2  -7  104.18    5.15
   1   2   7  103.54    5.15
   1   2   7  102.06    5.15
   1   2   7   95.04    6.40
  -1   2  -7   99.23    6.40
  -1   2  -7   95.93    6.40
   1   2   7  103.32    6.40
  -1  -2  -7  102.45    6.40
   1  -2   7  101.54    5.15
  -1  -2  -7  103.03    5.15
  -1  -2  -7   99.61    5.41
  -1  -2  -7  101.87    5.15
   1  -2   7   91.91    6.40
   1  -2   7   99.06    6.40
   1  -2   7  102.35    5.15
   1  -2   7   99.81    5.42
  -1  -2  -7   91.87    6.40
   0   2   7   32.32    1.64
   0   2   7   32.53    1.64
   0   2   7   26.74    2.04
   0   2   7   31.68    2.05
   0   2  -7   33.20    2.05
   0   2  -7   31.55    1.65
   0   2  -7   32.03    1.65
   0   2  -7   30.69    2.05
   0  -2  -7   31.57    1.65
   0  -2   7   31.83    2.05
   0  -2  -7   32.74    2.05
   0  -2   7   31.36    1.65
   0  -2   7   32.26    1.65
   0  -2  -7   31.76    1.72
   0  -2   7   33.26    2.05
   0  -2  -7   28.82    2.04
   0  -2  -7   32.28    1.65
   1   2  -7   42.44    2.08
  -1   2   7   38.86    2.58
   1   2  -7   37.07    2.58
  -1   2   7   44.45    2.07
  -1   2   7   41.28    2.07
   1   2  -7   38.84    2.58
  -1  -2   7   40.93    2.58
   1  -2  -7   37.14    2.58
   1  -2  -7   42.21    2.07
   1  -2  -7   38.82    2.58
  -1  -2   7   36.47    2.58
   1  -2  -7   40.12    2.07
  -2   2   7  286.39   15.11
   2   2  -7  298.24   15.18
   2   2  -7  289.84   15.16
  -2   2   7  308.05   15.12
   2   2  -7  277.53   18.73
  -2   2   7  306.09   18.79
  -2   2   7  298.86   18.79
   2   2  -7  302.62   18.84
   2  -2  -7  291.90   15.13
  -2  -2   7  287.54   18.73
  -2  -2   7  307.23   15.18
   2  -2  -7  288.90   15.14
  -2  -2   7  280.84   18.77
  -2  -2   7  297.55   15.16
   2  -2  -7  294.23   18.79
   2  -2  -7  277.52   18.75
   3   2  -7  121.56    5.97
  -3   2   7  115.92    5.95
   3   2  -7  106.71    7.42
  -3   2   7  123.13    7.41
  -3   2   7  107.22    7.40
  -3   2   7  117.99    5.95
   3   2  -7  110.32    7.42
   3  -2  -7  122.71    5.96
  -3  -2   7  119.07    7.42
   3  -2  -7  122.45    5.96
   3  -2  -7  112.39    7.41
  -3  -2   7  102.59    7.41
  -3  -2   7  115.04    5.97
  -3  -2   7  122.99    5.97
   4   2  -7    1.87    0.24
  -4   2   7    2.07    0.25
  -4   2   7    1.38    0.22
   4   2  -7    2.57    0.21
   4   2  -7    1.94    0.21
  -4  -2   7    2.04    0.29
  -4  -2   7    1.23    0.20
  -4  -2   7    1.92    0.19
   4  -2  -7    1.60    0.21
   4  -2  -7    1.91    0.19
   4  -2  -7    1.96    0.20
  -4  -2   7    2.06    0.18
   5   2  -7    1.44    0.18
  -5   2   7    1.95    0.28
  -5   2   7    1.88    0.24
   5   2  -7    1.41    0.18
   5   2  -7    1.69    0.25
  -5  -2   7    1.57    0.19
   5  -2  -7    1.87    0.22
   5  -2  -7    2.04    0.28
  -5  -2   7    1.80    0.26
   5  -2  -7    1.53    0.18
  -5  -2   7    1.82    0.24
  -6   2   7   28.71    1.80
   6   2  -7   26.70    1.82
  -6   2   7   26.09    1.77
   6   2  -7   25.02    1.45
   6   2  -7   24.78    1.45
  -6  -2   7   29.39    1.83
   6  -2  -7   24.90    1.44
   6  -2  -7   26.17    1.83
   6  -2  -7   27.84    1.45
  -7   2   7    3.44    0.43
   7  -2  -7    2.57    0.28
  -7  -2   7    3.53    0.50
  -7   3  -7    0.98    0.25
  -7  -3  -7    1.25    0.31
   7  -3   7    0.74    0.19
   6   3   7    4.57    0.50
  -6   3  -7    4.16    0.43
  -6   3  -7    3.84    0.40
  -6  -3  -7    4.76    0.51
   6  -3   7    3.84    0.35
   6  -3   7    3.35    0.34
   5   3   7   98.45    6.12
  -5   3  -7   92.54    6.09
  -5   3  -7   87.34    5.18
   5   3   7   92.49    4.91
  -5   3  -7  106.57    6.10
   5   3   7   92.17    4.91
  -5  -3  -7  105.79    6.12
  -5  -3  -7   97.39    4.91
  -5  -3  -7   85.26    4.90
   5  -3   7   92.95    4.91
   5  -3   7  100.01    4.91
  -5  -3  -7   84.73    6.10
   5  -3   7   94.13    6.10
  -4   3  -7   37.78    2.19
  -4   3  -7   42.82    2.56
   4   3   7   38.75    2.58
  -4   3  -7   38.32    2.56
   4   3   7   39.32    2.07
   4   3   7   34.39    2.57
   4   3   7   40.11    2.07
   4  -3   7   41.44    2.06
   4  -3   7   39.03    2.06
  -4  -3  -7   38.70    2.06
  -4  -3  -7   41.48    2.58
  -4  -3  -7   40.54    2.07
   4  -3   7   39.30    2.57
  -4  -3  -7   36.89    2.57
   3   3   7    6.87    0.55
  -3   3  -7    6.95    0.47
  -3   3  -7    7.58    0.53
   3   3   7    6.36    0.53
  -3   3  -7    7.54    0.53
  -3   3  -7    7.48    0.41
   3   3   7    7.44    0.43
  -3   3  -7    7.45    0.40
  -3  -3  -7    6.76    0.54
   3  -3   7    7.84    0.43
   3  -3   7    7.20    0.53
  -3  -3  -7    6.20    0.42
  -3  -3  -7    7.31    0.55
  -3  -3  -7    7.76    0.44
   3  -3   7    7.80    0.43
   2   3   7   63.87    3.26
  -2   3  -7   63.47    3.25
  -2   3  -7   65.43    4.05
  -2   3  -7   63.84    3.25
  -2   3  -7   59.74    4.05
  -2   3  -7   58.55    3.44
   2   3   7   61.68    4.06
   2   3   7   65.43    4.06
   2  -3   7   65.10    3.26
   2  -3   7   64.34    4.06
  -2  -3  -7   59.43    4.06
  -2  -3  -7   64.21    4.06
   2  -3   7   65.93    3.26
  -2  -3  -7   62.73    3.26
   2  -3   7   61.03    4.05
  -2  -3  -7   66.49    3.27
   2  -3   7   59.80    3.44
  -1   3  -7  120.44    5.89
   1   3   7  120.60    5.90
  -1   3  -7  112.13    7.32
   1   3   7  117.59    5.89
   1   3   7  107.26    7.32
  -1   3  -7  113.27    5.91
  -1  -3  -7  115.63    5.90
  -1  -3  -7  115.67    5.90
   1  -3   7  113.22    7.33
   1  -3   7  106.28    7.33
   1  -3   7  116.57    5.89
  -1  -3  -7  107.33    7.33
  -1  -3  -7  113.98    7.33
   1  -3   7  117.81    6.21
   1  -3   7  119.71    5.90
   0   3   7  257.52   16.49
   0   3   7  262.13   13.25
   0   3  -7  243.90   16.43
   0   3  -7  251.83   16.46
   0   3  -7  258.81   13.27
   0   3  -7  262.77   13.31
   0   3   7  256.08   13.26
   0  -3  -7  245.23   16.36
   0  -3  -7  261.95   13.21
   0  -3   7  255.98   13.26
   0  -3   7  240.84   16.49
   0  -3  -7  264.30   13.23
   0  -3  -7  261.77   16.42
   0  -3   7  260.92   13.29
   0  -3   7  258.52   16.49
   0  -3  -7  263.52   13.89
  -1   3   7   13.58    0.96
  -1   3   7   15.14    0.76
   1   3  -7   14.07    0.98
  -1   3   7   15.44    0.76
   1   3  -7   13.37    0.97
  -1   3   7   14.80    0.96
   1   3  -7   14.53    0.78
   1   3  -7   15.12    0.78
  -1  -3   7   12.88    0.97
  -1  -3   7   15.40    0.78
  -1  -3   7   14.56    0.98
   1  -3  -7   14.95    0.97
  -1  -3   7   14.73    0.78
   1  -3  -7   13.59    0.96
   1  -3  -7   14.86    0.77
   1  -3  -7   14.98    0.77
   2   3  -7    9.21    0.53
   2   3  -7   10.82    0.68
  -2   3   7   10.00    0.65
  -2   3   7    9.50    0.50
  -2   3   7    9.05    0.50
   2   3  -7    9.37    0.67
  -2   3   7    9.44    0.53
   2  -3  -7    9.26    0.52
  -2  -3   7   10.38    0.67
  -2  -3   7    9.40    0.67
   2  -3  -7    9.18    0.65
   2  -3  -7    8.97    0.52
  -2  -3   7    9.34    0.53
  -3   3   7   11.27    0.77
   3   3  -7   11.01    0.63
  -3   3   7   12.36    0.77
   3   3  -7   10.98    0.79
   3   3  -7   12.44    0.81
   3   3  -7   11.03    0.63
  -3  -3   7   11.70    0.81
  -3  -3   7   11.65    0.80
  -3  -3   7   10.47    0.63
   3  -3  -7   11.04    0.62
   3  -3  -7   11.35    0.78
  -3  -3   7   10.88    0.63
   3  -3  -7   11.38    0.62
   4   3  -7   56.59    2.91
  -4   3   7   58.36    3.05
   4   3  -7   56.94    2.91
  -4   3   7   57.67    3.60
  -4   3   7   52.34    3.59
   4   3  -7   55.43    3.63
   4   3  -7   49.42    3.62
   4  -3  -7   56.92    2.90
   4  -3  -7   54.58    3.61
  -4  -3   7   59.77    3.63
  -4  -3   7   50.03    3.61
  -4  -3   7   55.42    2.91
   4  -3  -7   59.27    2.90
  -4  -3   7   57.95    2.91
   5   3  -7    5.66    0.50
  -5   3   7    5.60    0.44
   5   3  -7    5.05    0.38
   5   3  -7    5.06    0.37
  -5   3   7    4.82    0.37
  -5   3   7    5.15    0.42
   5  -3  -7    5.19    0.45
   5  -3  -7    5.14    0.36
  -5  -3   7    4.84    0.35
[truncated: 495,123 more chars]
